# Supplementary material for: Copper-catalyzed remote C(sp3)–H azidation and oxidative trifluoromethylation of benzohydrazides
Source: PubMed Central journal article supplement (PMC6377619; doi:10.1038/s41467-019-08741-w), 2019-02-15
Supplement: 41467_2019_8741_MOESM1_ESM.pdf [file 41467_2019_8741_MOESM1_ESM.pdf]

## Supplementary Information

# Copper-catalyzed remote C(sp<sup>3</sup>)-H azidation and oxidative trifluoromethylation of benzohydrazides

Bao, X., *et al*

## Supplementary Figures

BAOX1295F.1.fid —

7.446  
7.426  
7.403  
7.399  
7.381  
7.385  
7.383  
7.380  
7.380  
7.381  
7.381  
7.377  
7.237  
7.234  
7.216  
7.200  
7.196  
6.171

5.104  
5.087  
5.070  
5.053

2.877  
2.865

1.472  
1.455

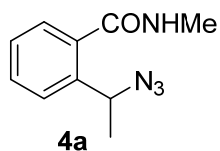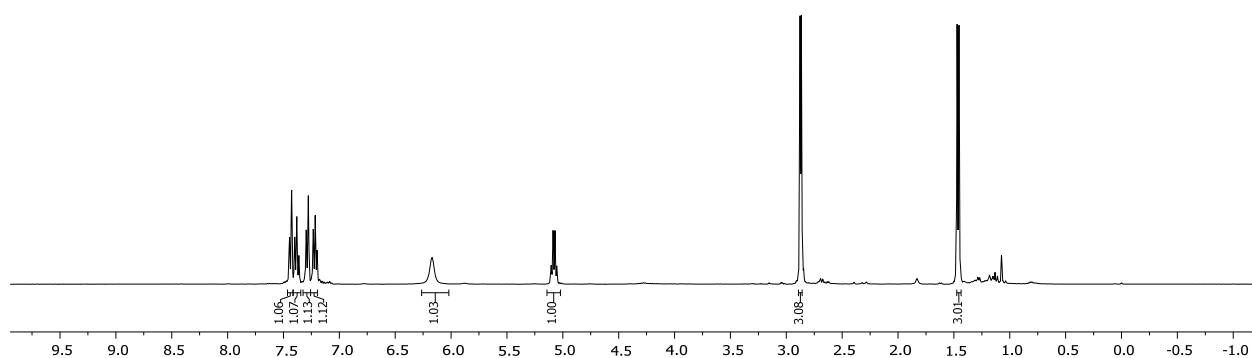

## Supplementary Figure 1. <sup>1</sup>H spectra of 4a

BAOX1295F.2.fid — ChemInfo\_13C\_cpdc CDCI3 /opt/ xbao 35

169.889

139.683  
135.933  
134.918  
127.918  
127.035  
126.765

77.478  
77.160  
76.843

57.403

26.796  
21.657

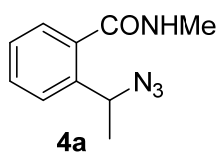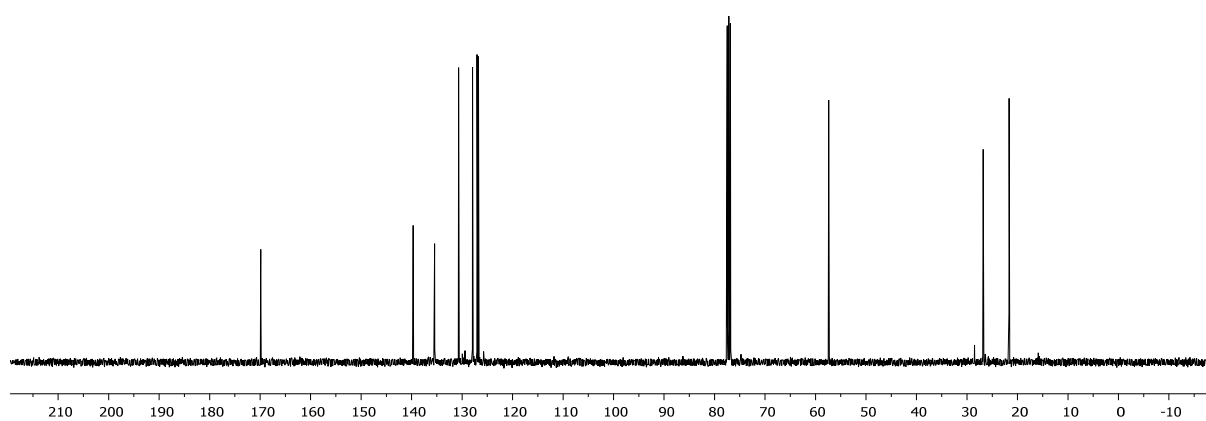

## Supplementary Figure 2. <sup>13</sup>C NMR spectra of 4a

BAOX1296A.1.fid — ChemInfo\_1Hzq CDCl3 /opt/ xbao 36

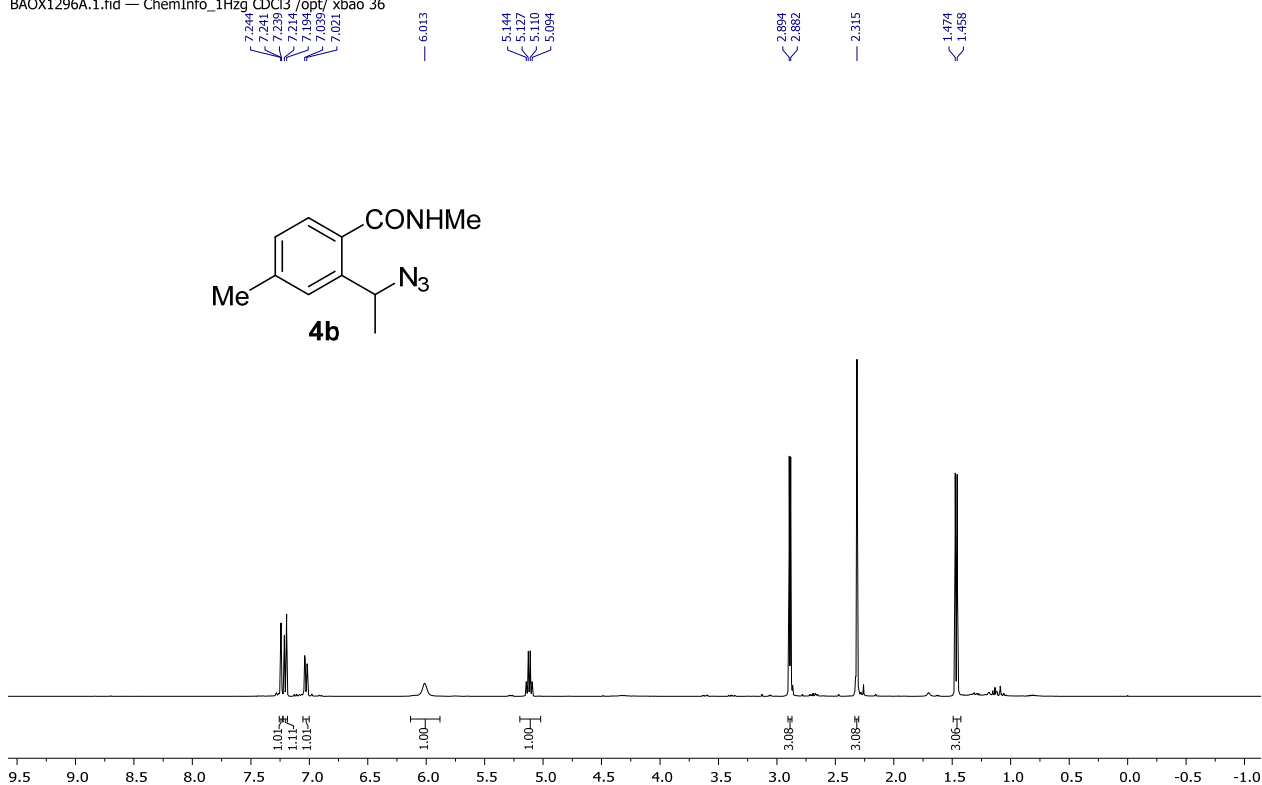

Supplementary Figure 3. <sup>13</sup>C NMR spectra of 4b

BAOX1296A.2.fid — ChemInfo\_13C\_cpd CDCl3 /opt/ xbao 36

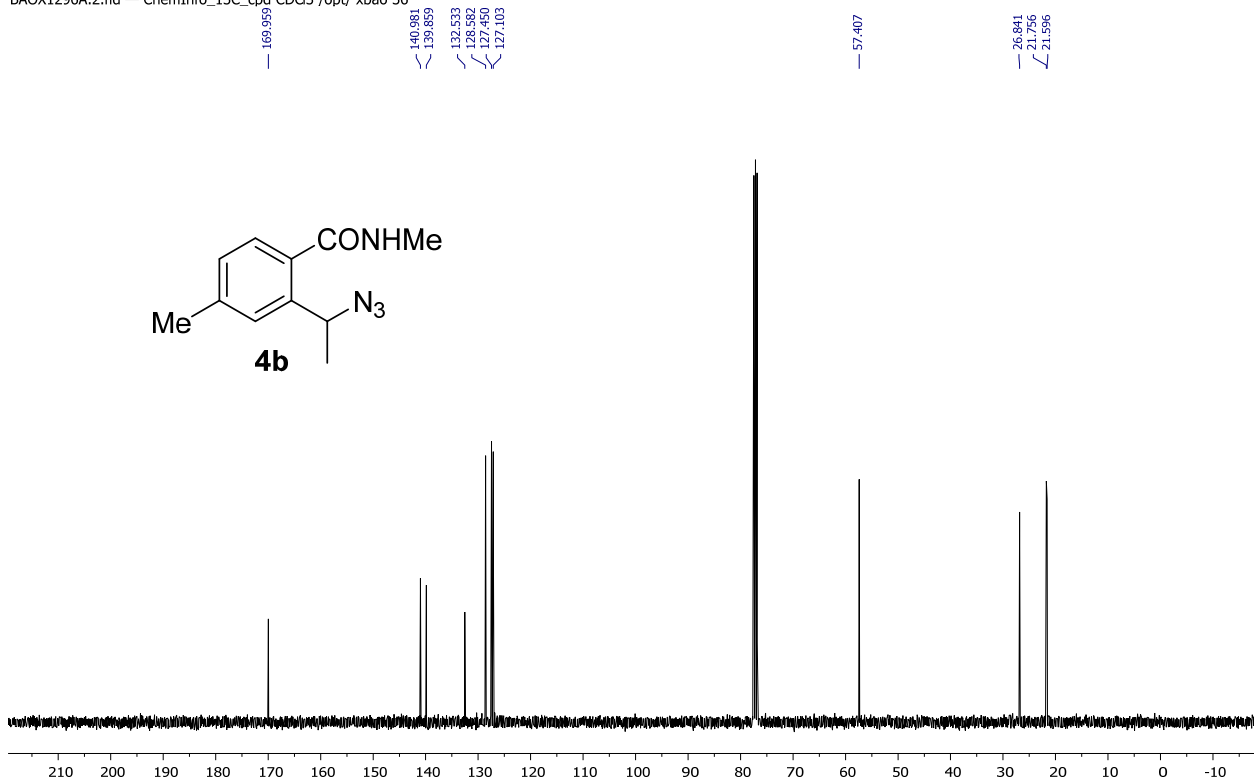

Supplementary Figure 4. <sup>13</sup>C NMR spectra of 4b

BAOX1296B.1.fid — ChemInfo\_1Hzq CDCl3 /opt/ xbao 37

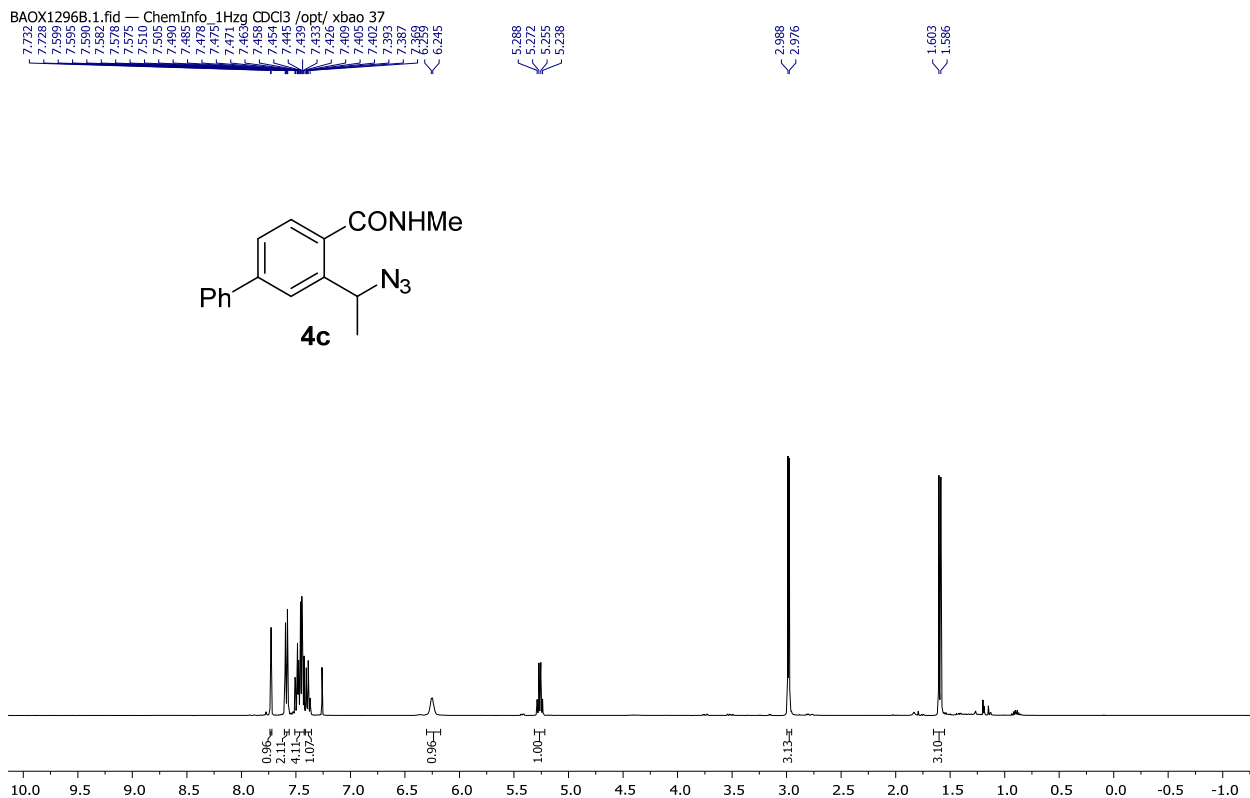

Supplementary Figure 5. <sup>1</sup>H spectra of 4c

BAOX1296B.2.fid — ChemInfo\_13C\_cpq CDCl3 /opt/ xbao 37

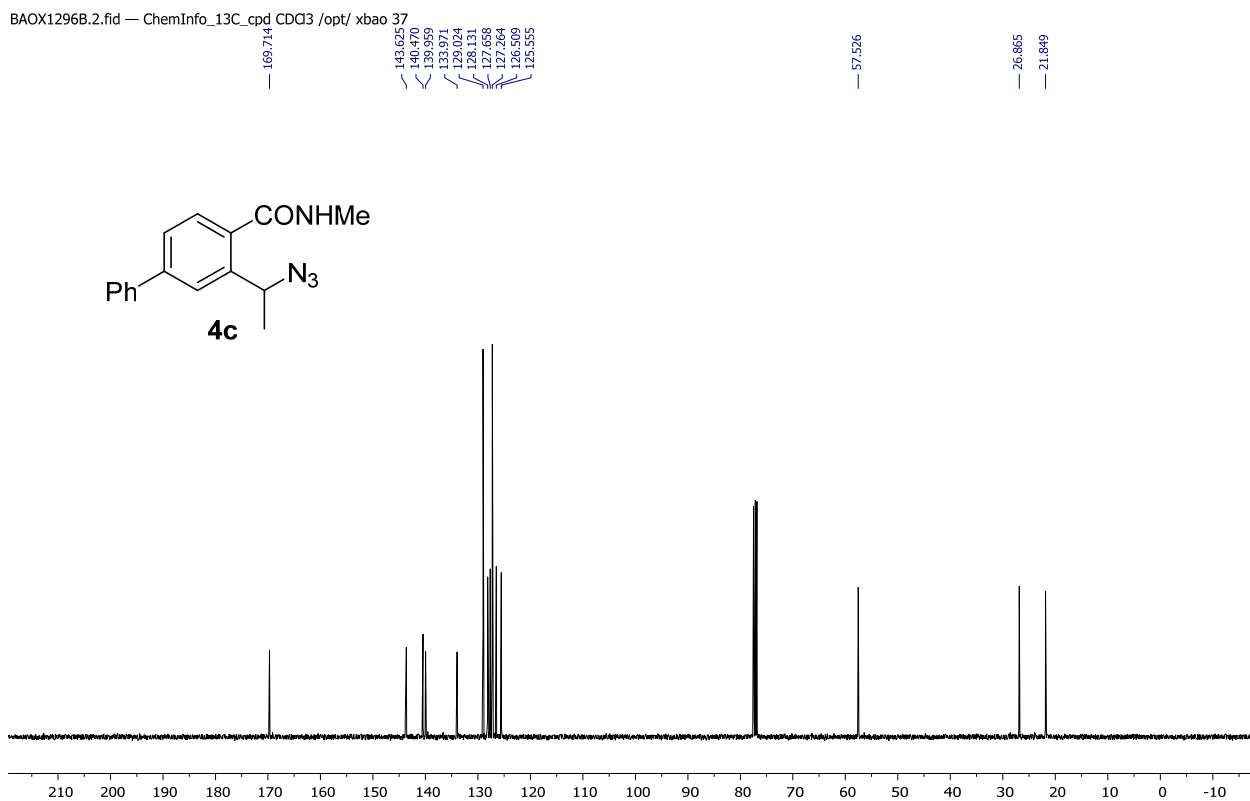

Supplementary Figure 6. <sup>13</sup>C NMR spectra of 4c

BAOX1298F.1.fid

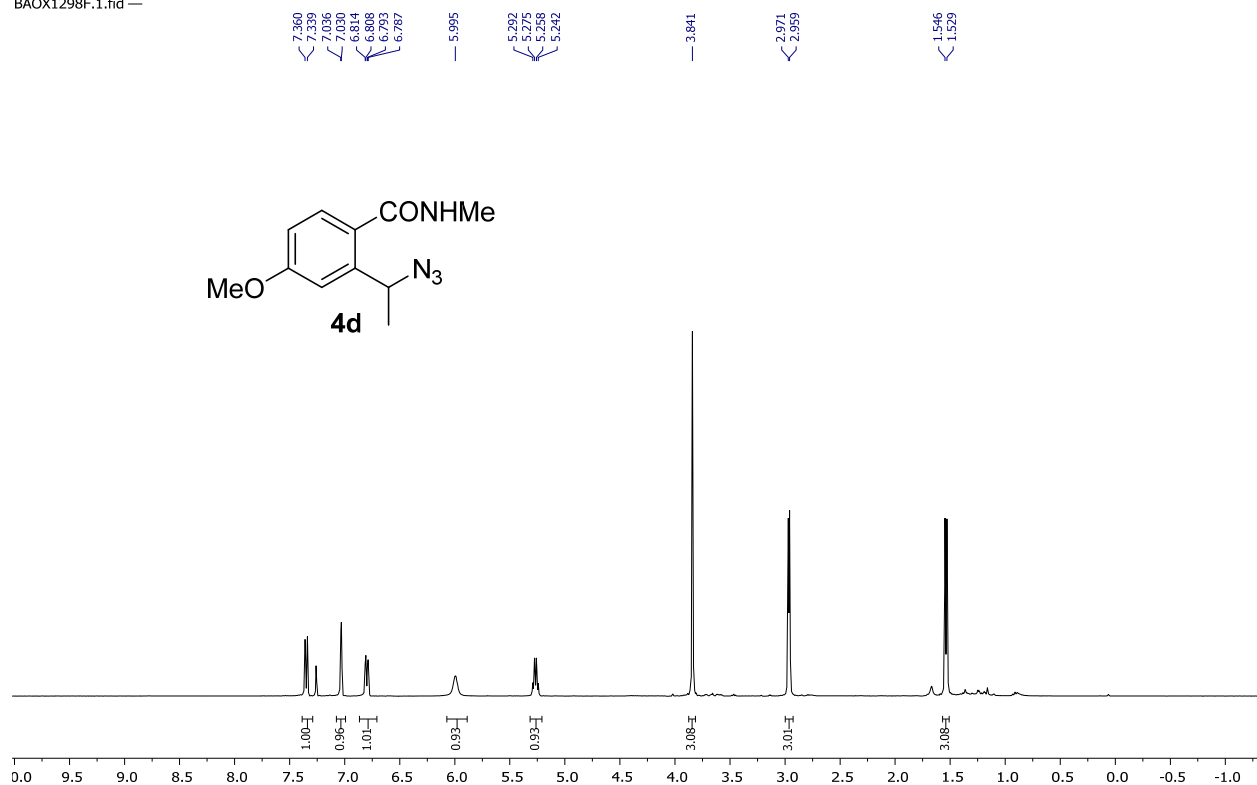

Supplementary Figure 7. <sup>1</sup>H spectra of 4d

BAOX1298F.2.fid

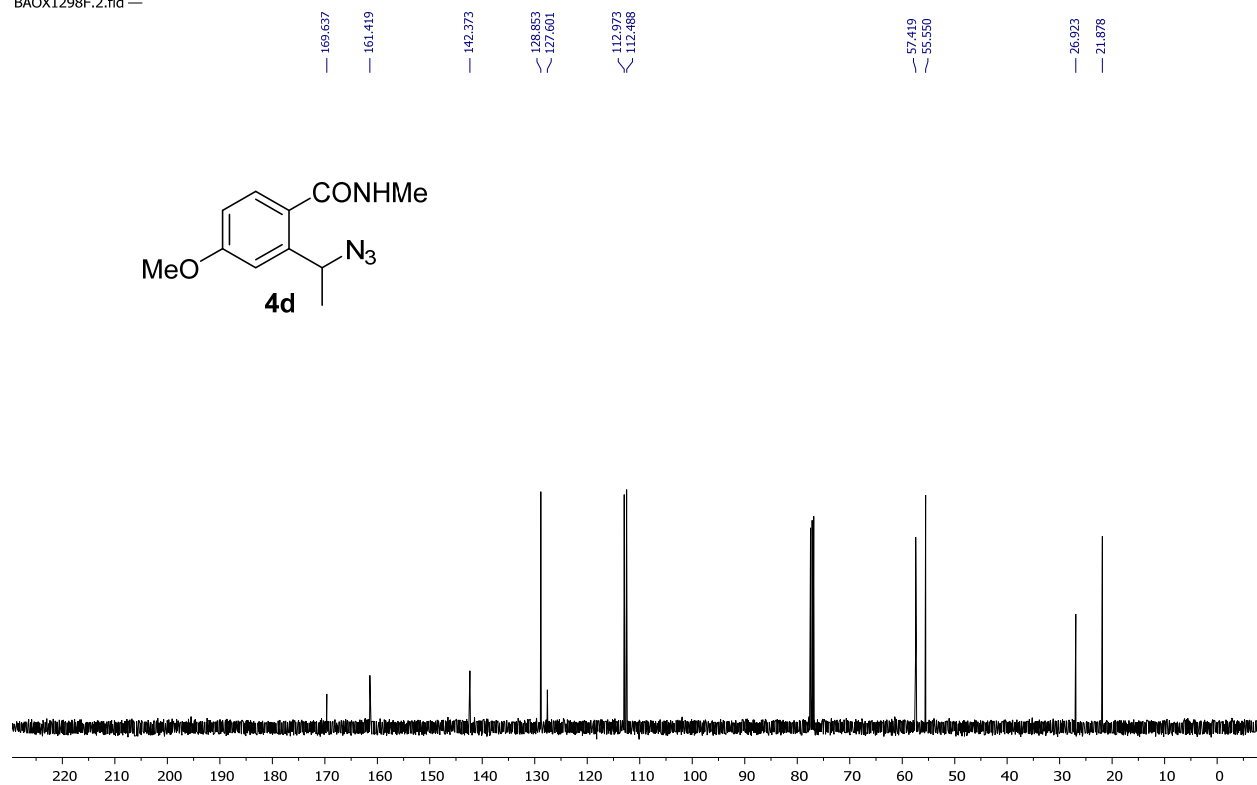

Supplementary Figure 8. <sup>13</sup>C NMR spectra of 4d

BAOX1298G.1.fid

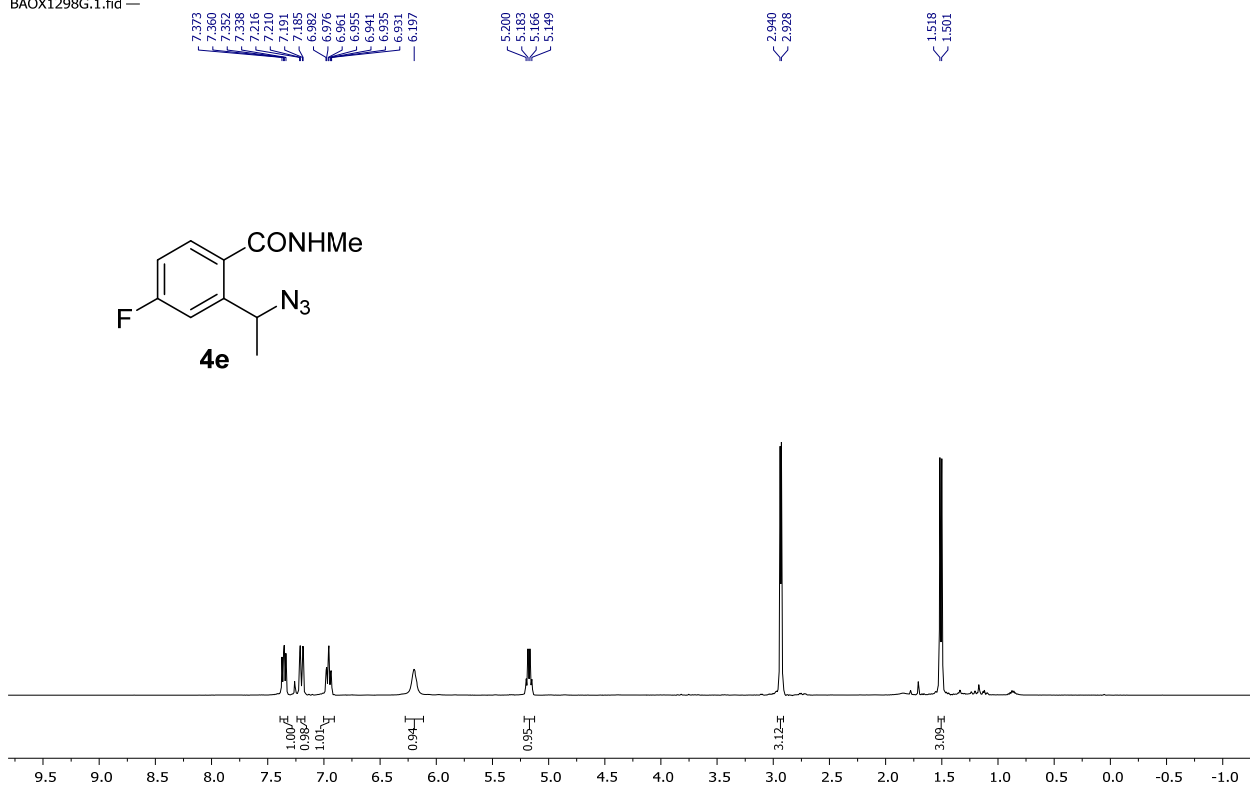

Supplementary Figure 9.  $^1\text{H}$  spectra of **4e**

BAOX1298G.2.fid

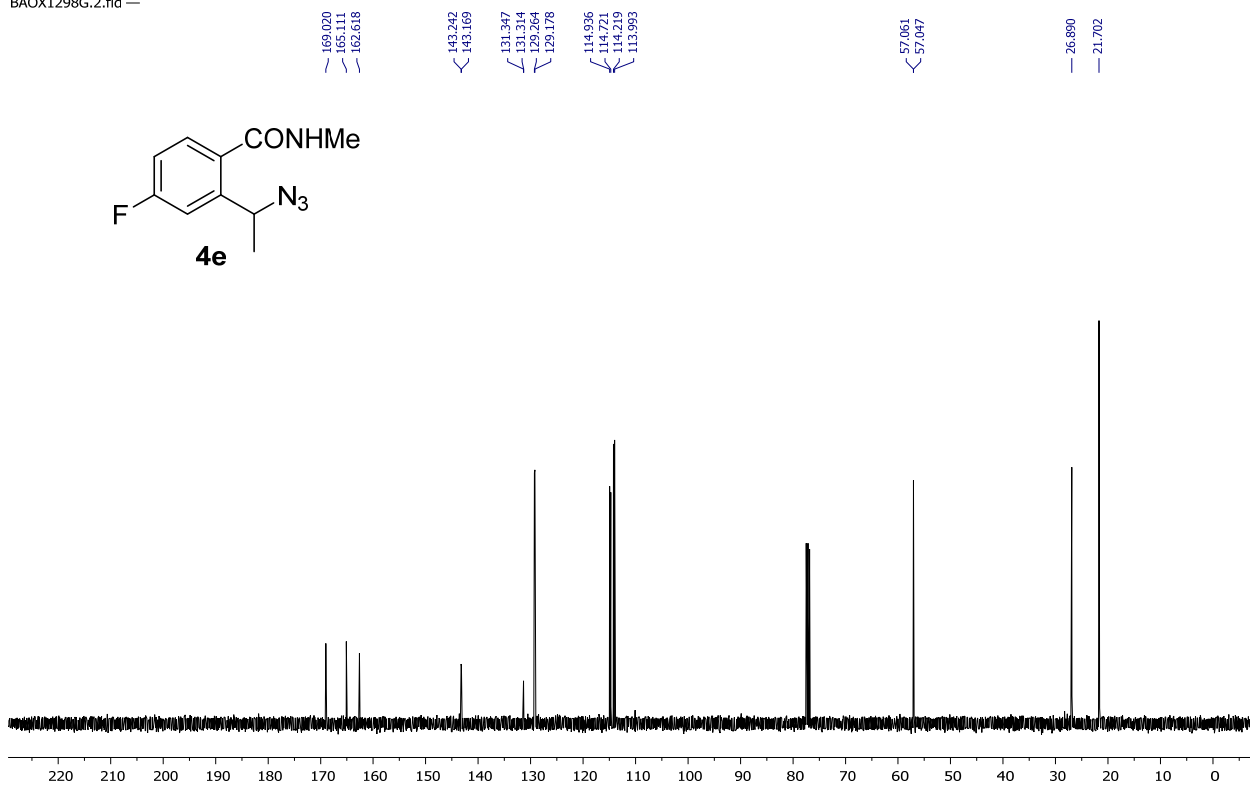

Supplementary Figure 10.  $^{13}\text{C}$  NMR spectra of **4e**

BAOX1302B.1.fid

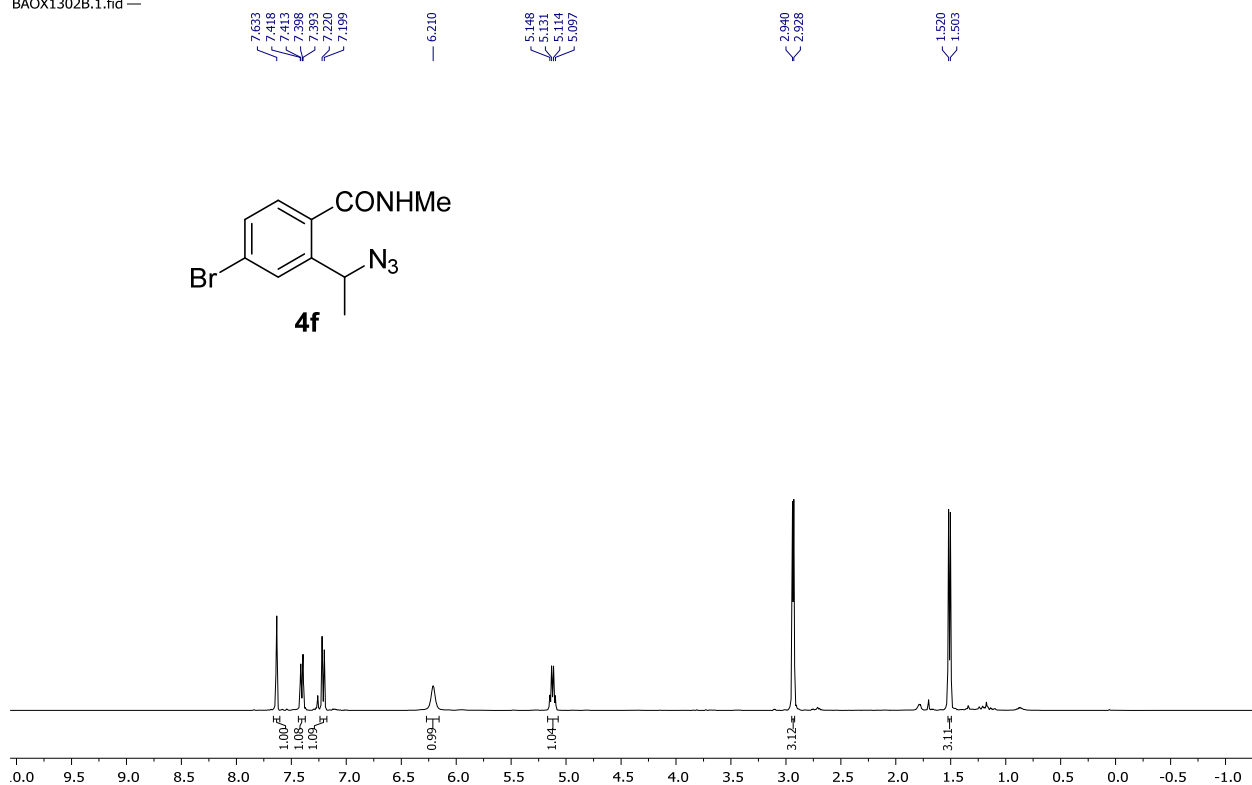

Supplementary Figure 11. <sup>1</sup>H spectra of 4f

BAOX1302B.2.fid

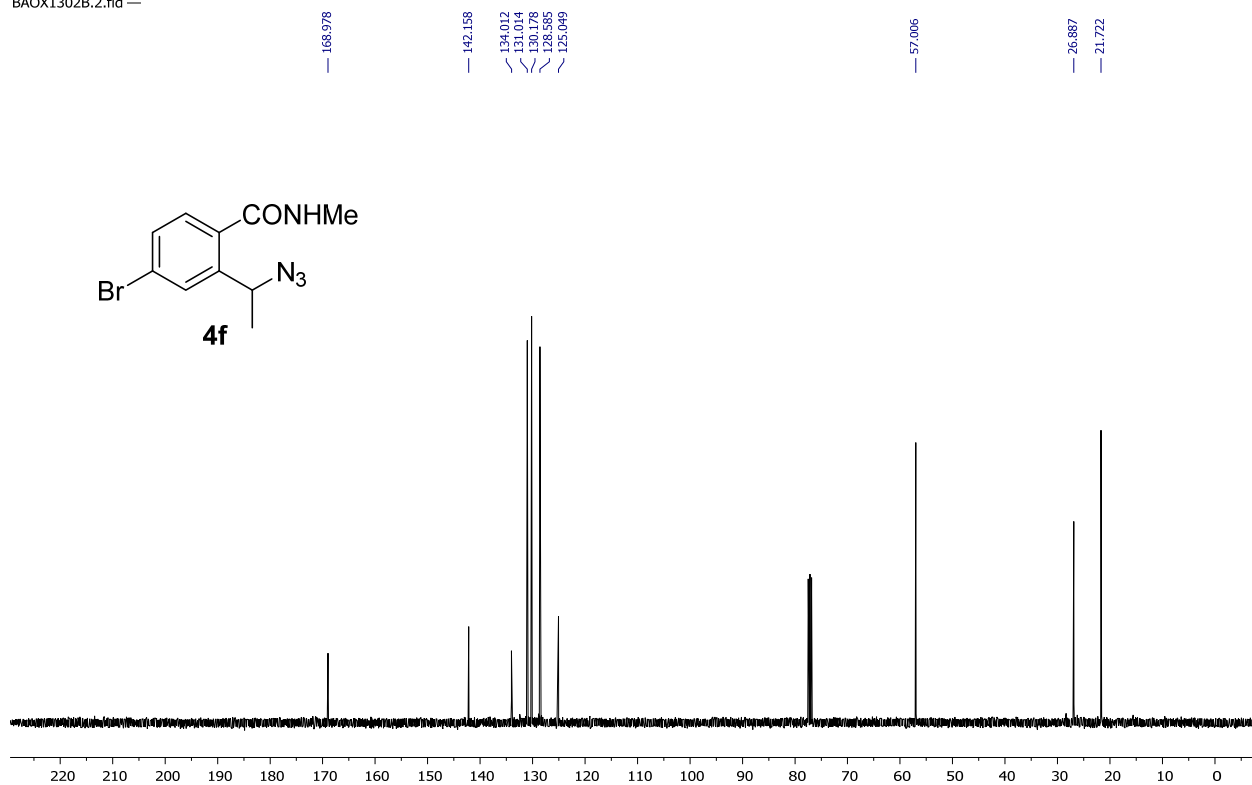

Supplementary Figure 12. <sup>13</sup>C NMR spectra of 4f

BAOX1297E-2.1.fid —

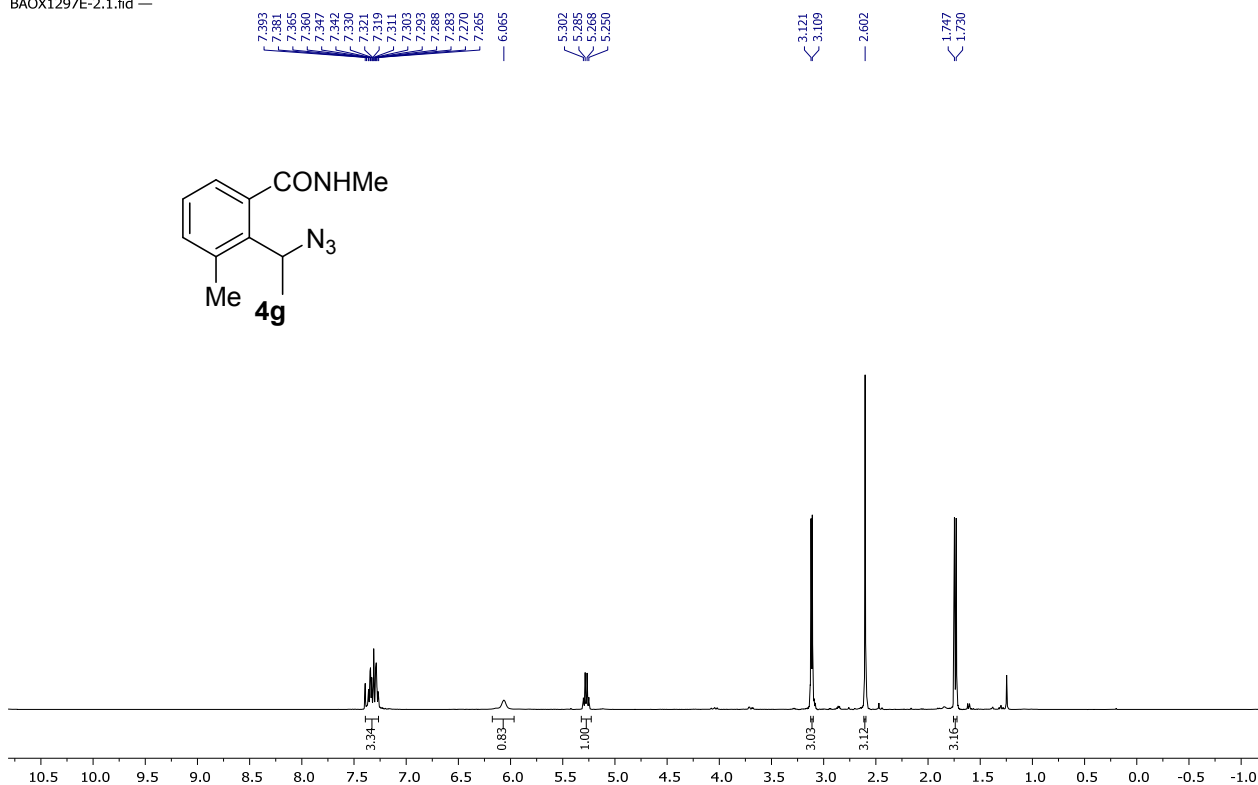

Supplementary Figure 13. <sup>1</sup>H spectra of 4g

BAOX1297E-2.2.fid —

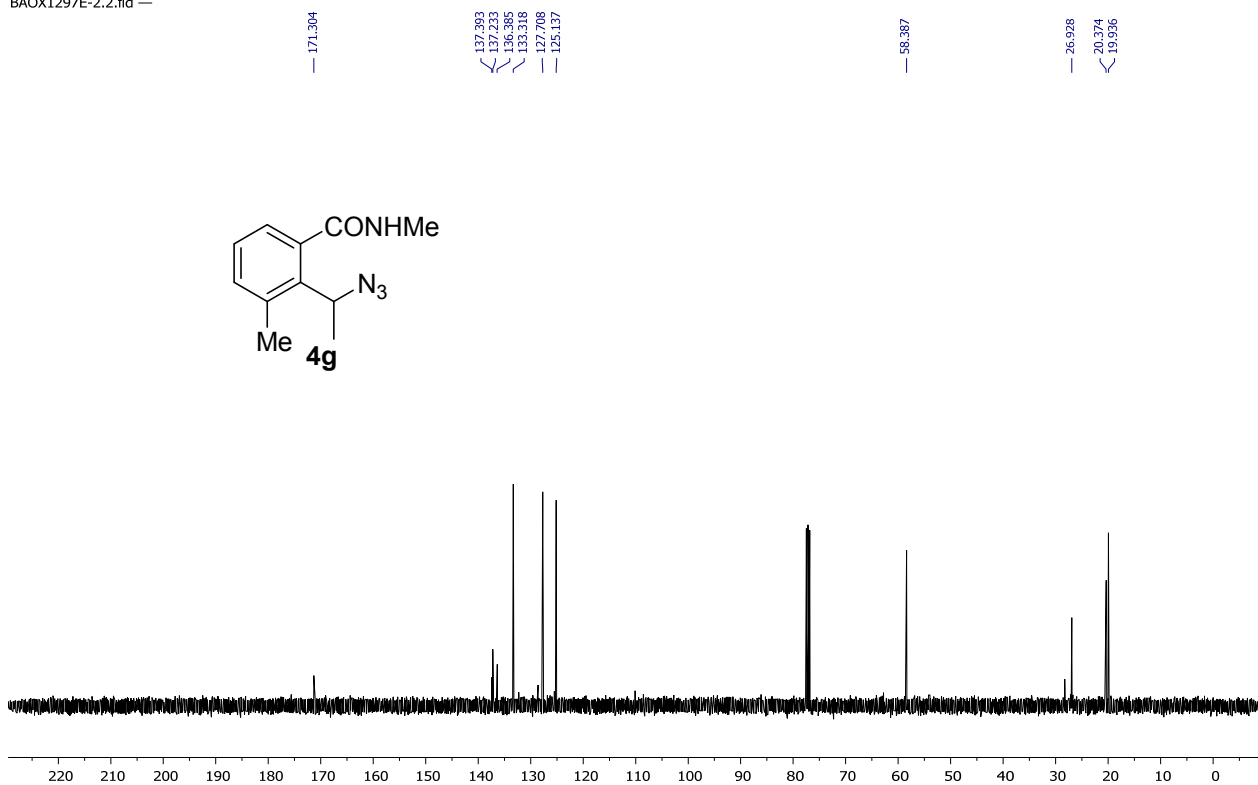

Supplementary Figure 14. <sup>13</sup>C NMR spectra of 4g



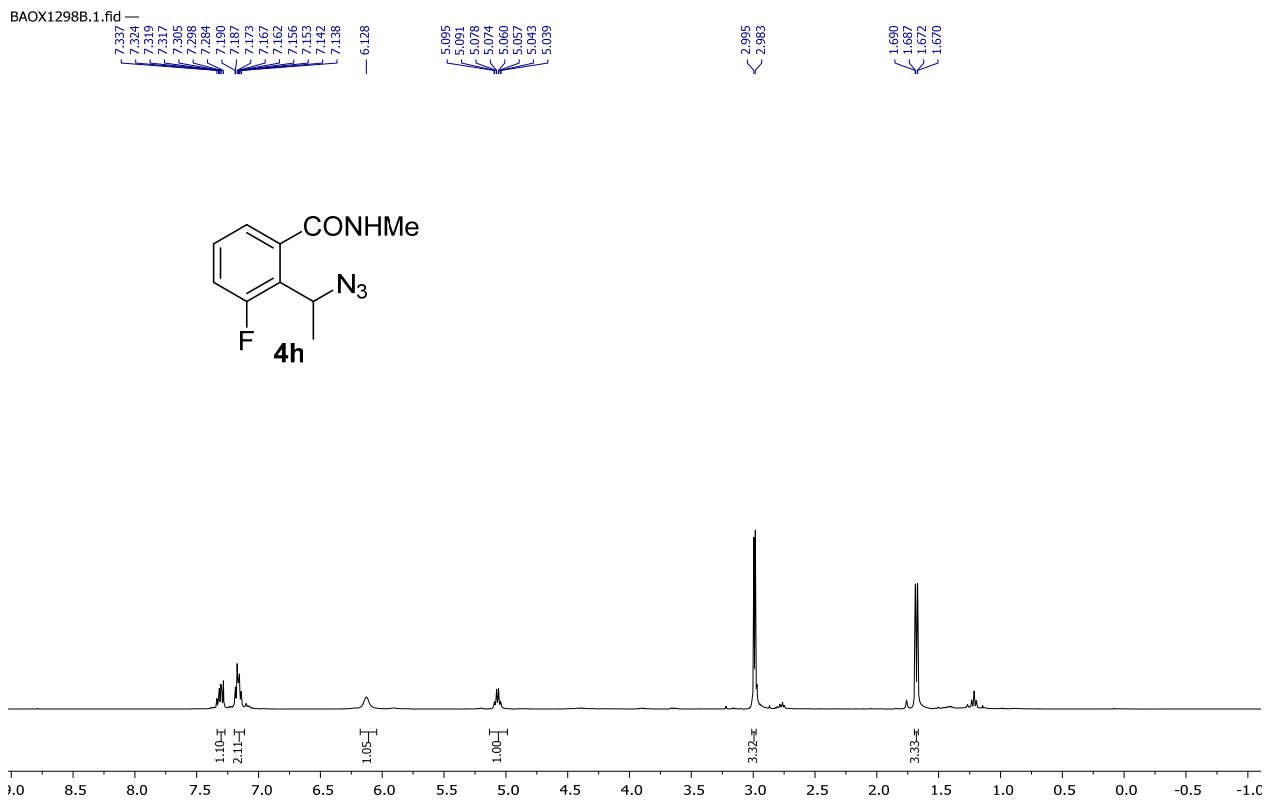

Supplementary Figure 15.  $^1\text{H}$  spectra of 4h

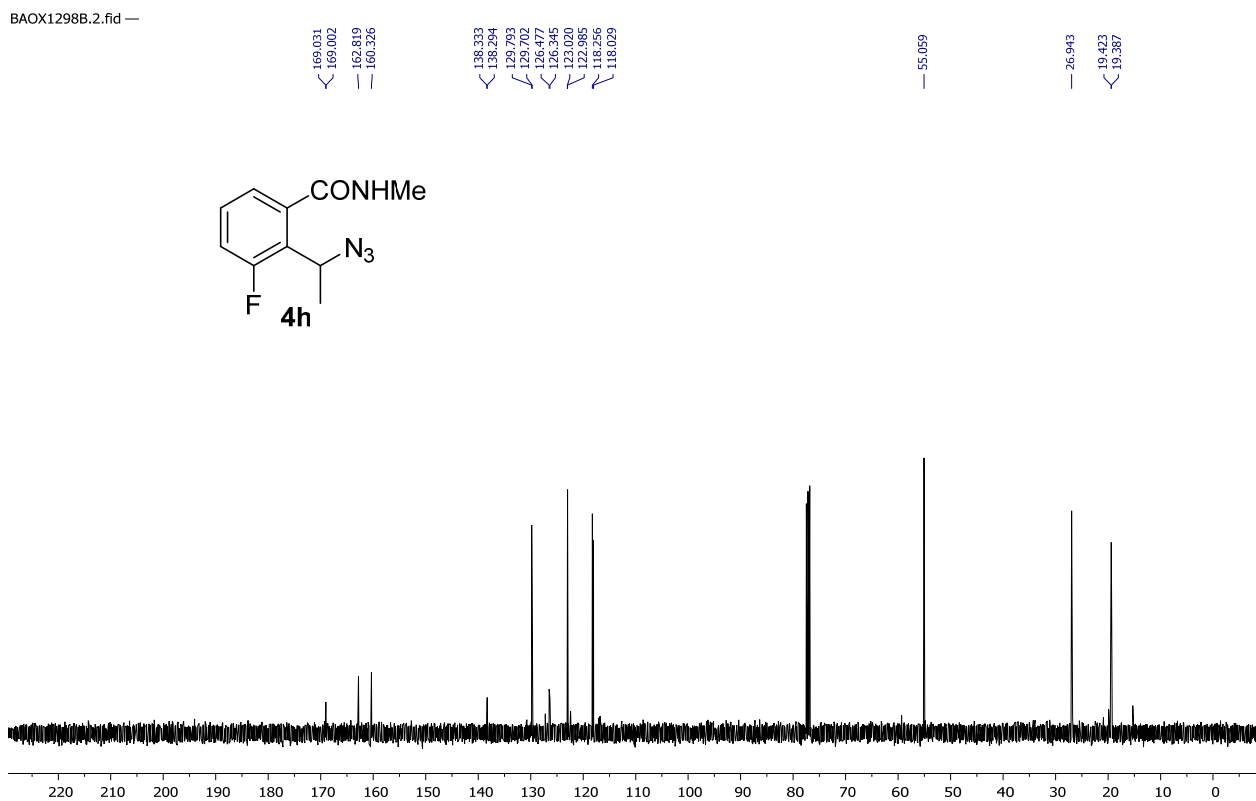

Supplementary Figure 16.  $^{13}\text{C}$  NMR spectra of 4h

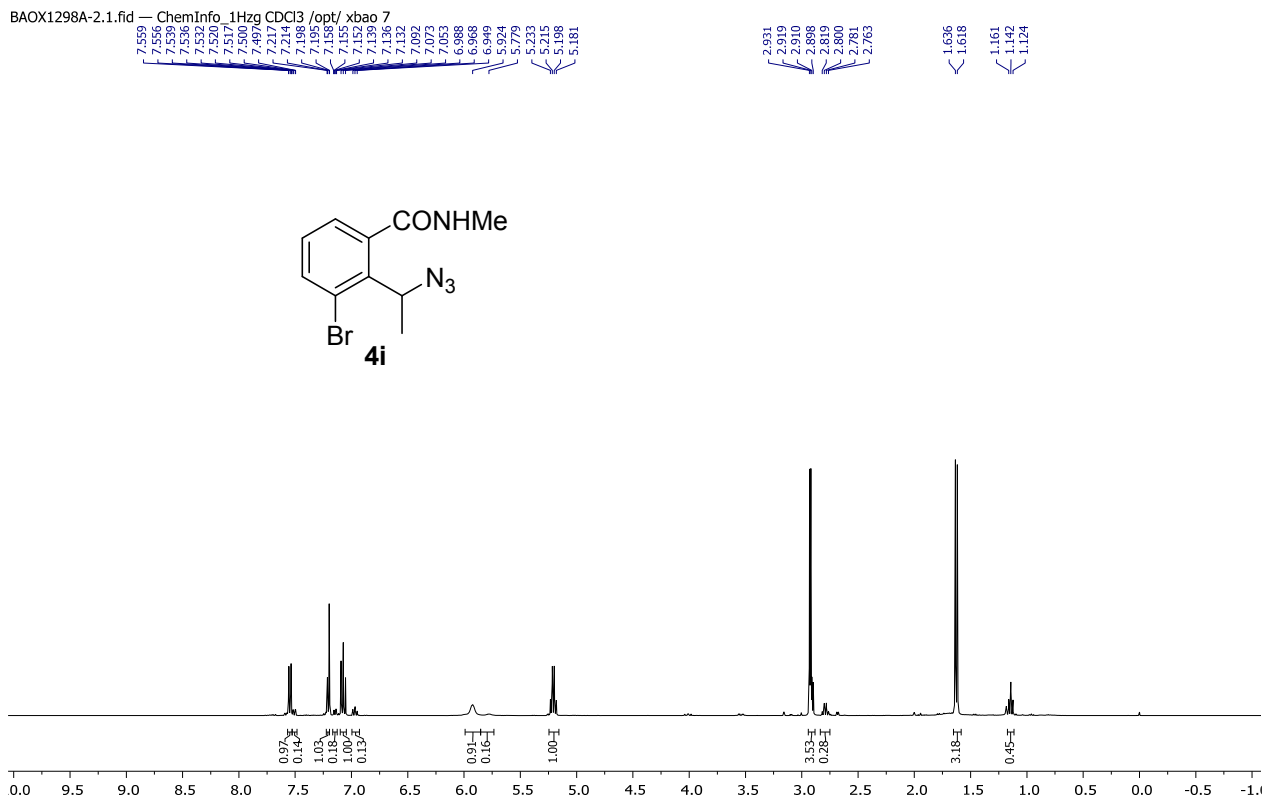

Supplementary Figure 17. <sup>1</sup>H spectra of **4i**

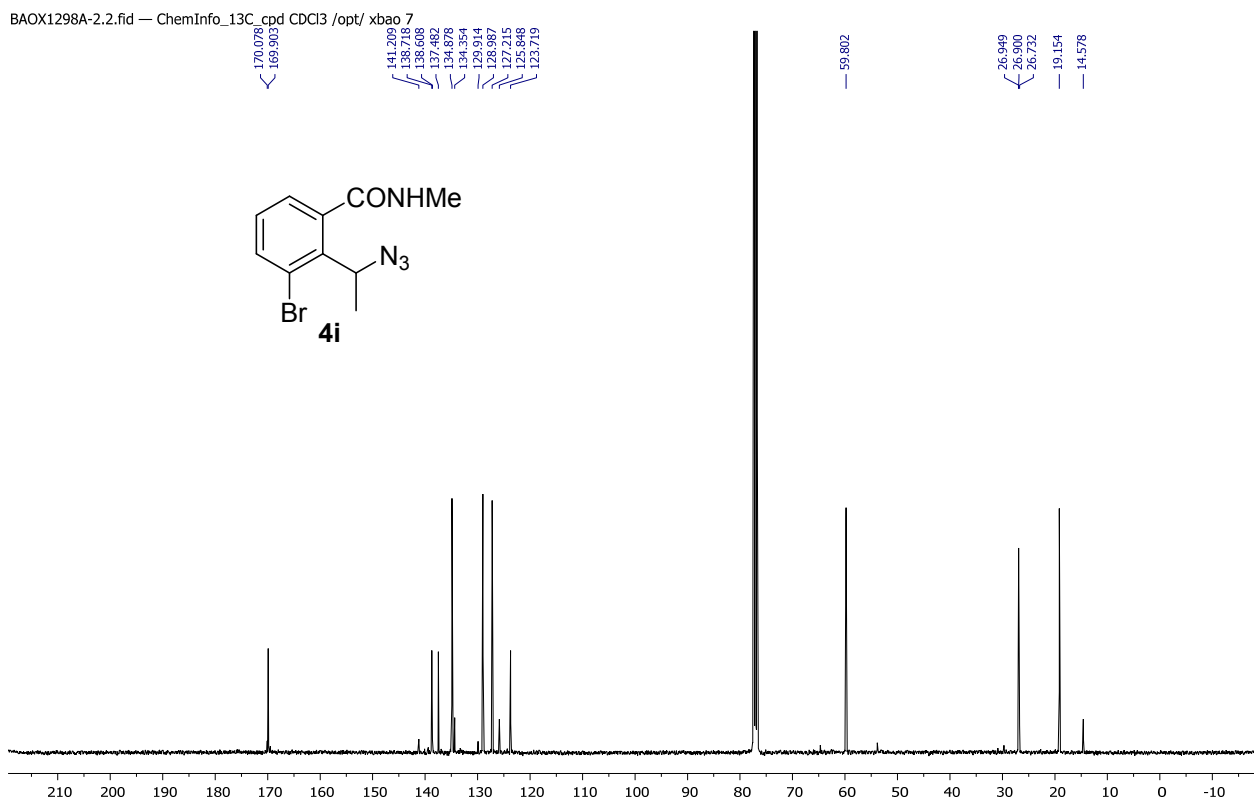

Supplementary Figure 18. <sup>13</sup>C NMR spectra of **4i**

BAOX1302A.2.fid

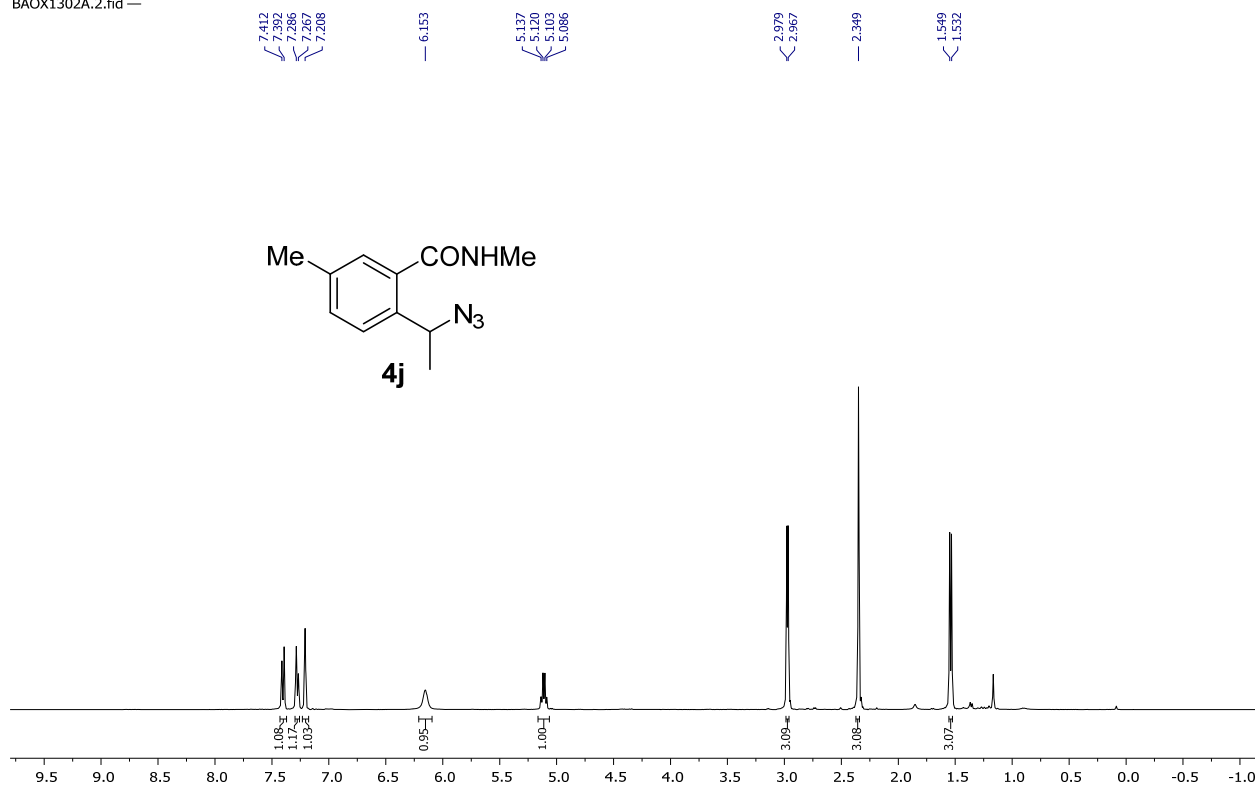

Supplementary Figure 19. <sup>1</sup>H spectra of **4j**

BAOX1302A.3.fid

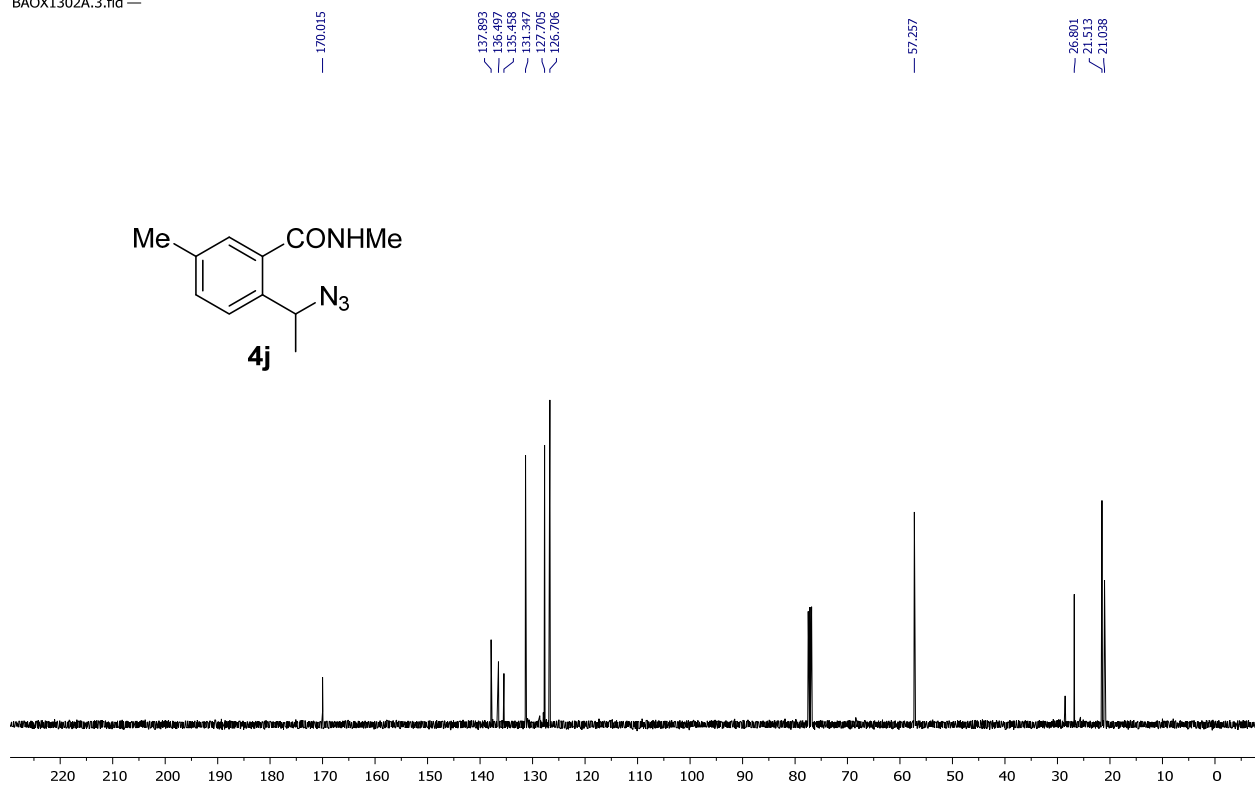

Supplementary Figure 20. <sup>13</sup>C NMR spectra of **4j**

BAOX1302D-B.1.fid —

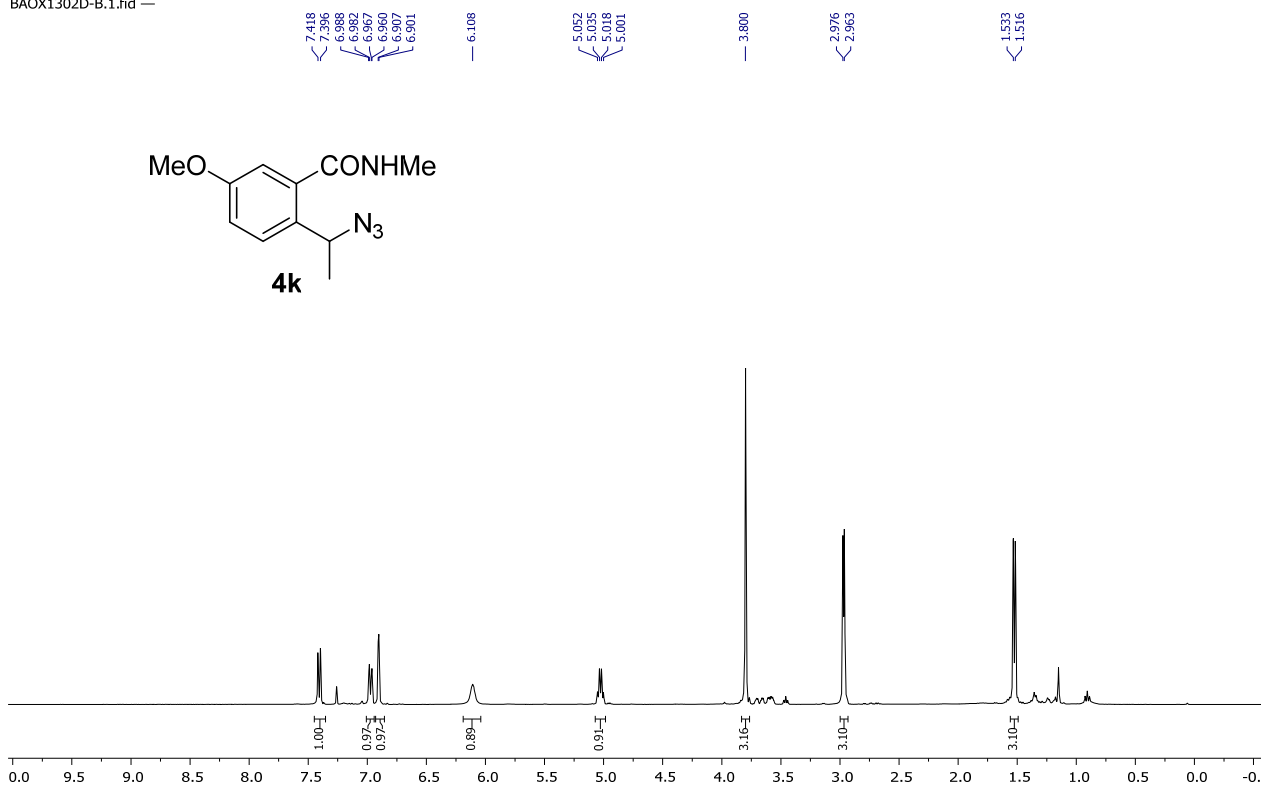

Supplementary Figure 21. <sup>1</sup>H spectra of 4k

BAOX1302D-B.2.fid —

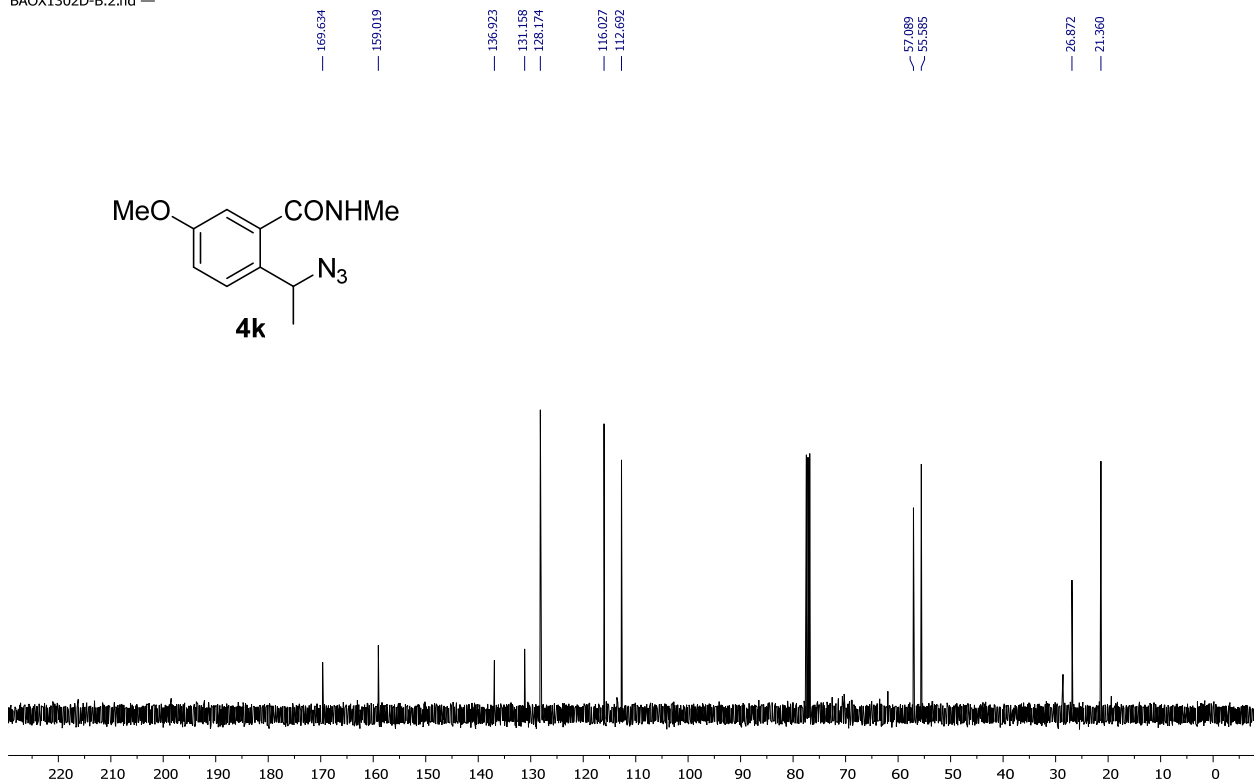

Supplementary Figure 22. <sup>13</sup>C NMR spectra of 4k

BAOX1302D-A.1.fid —

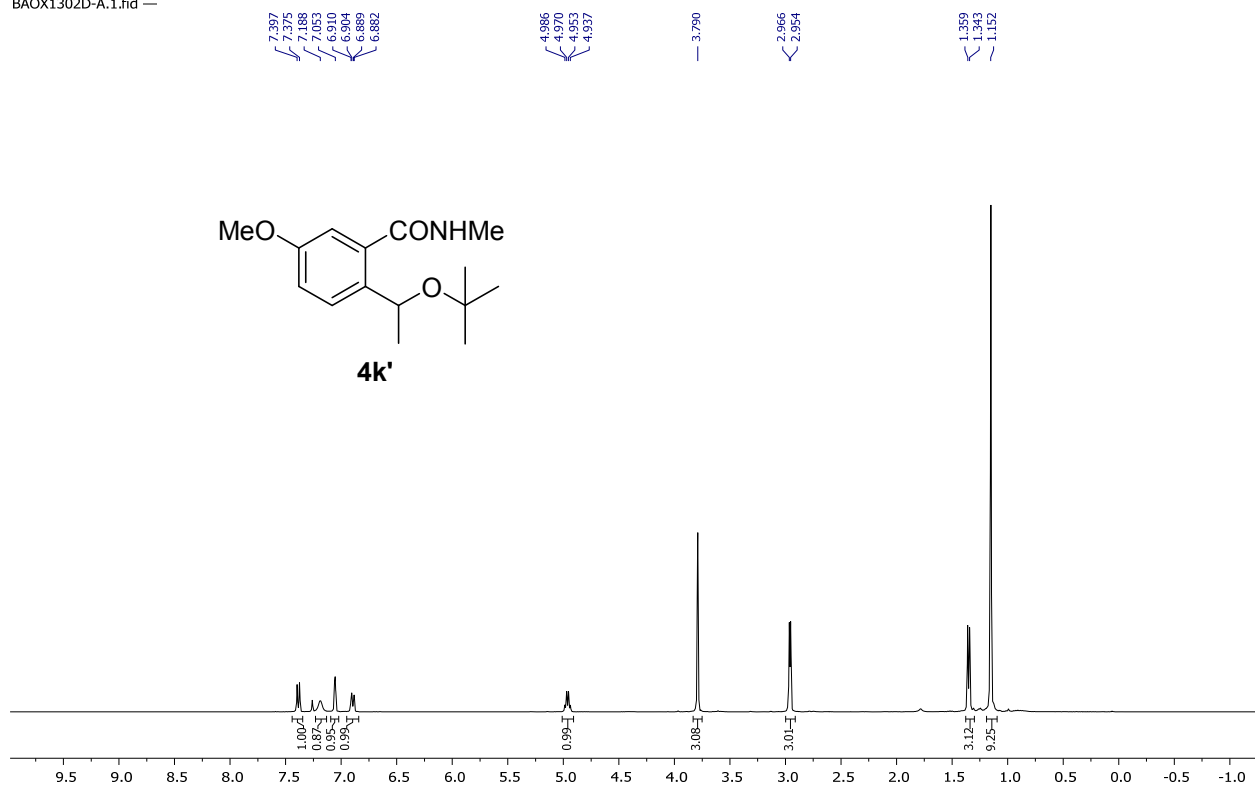

Supplementary Figure 23. <sup>1</sup>H spectra of **4k'**

BAOX1302D-A.2.fid —

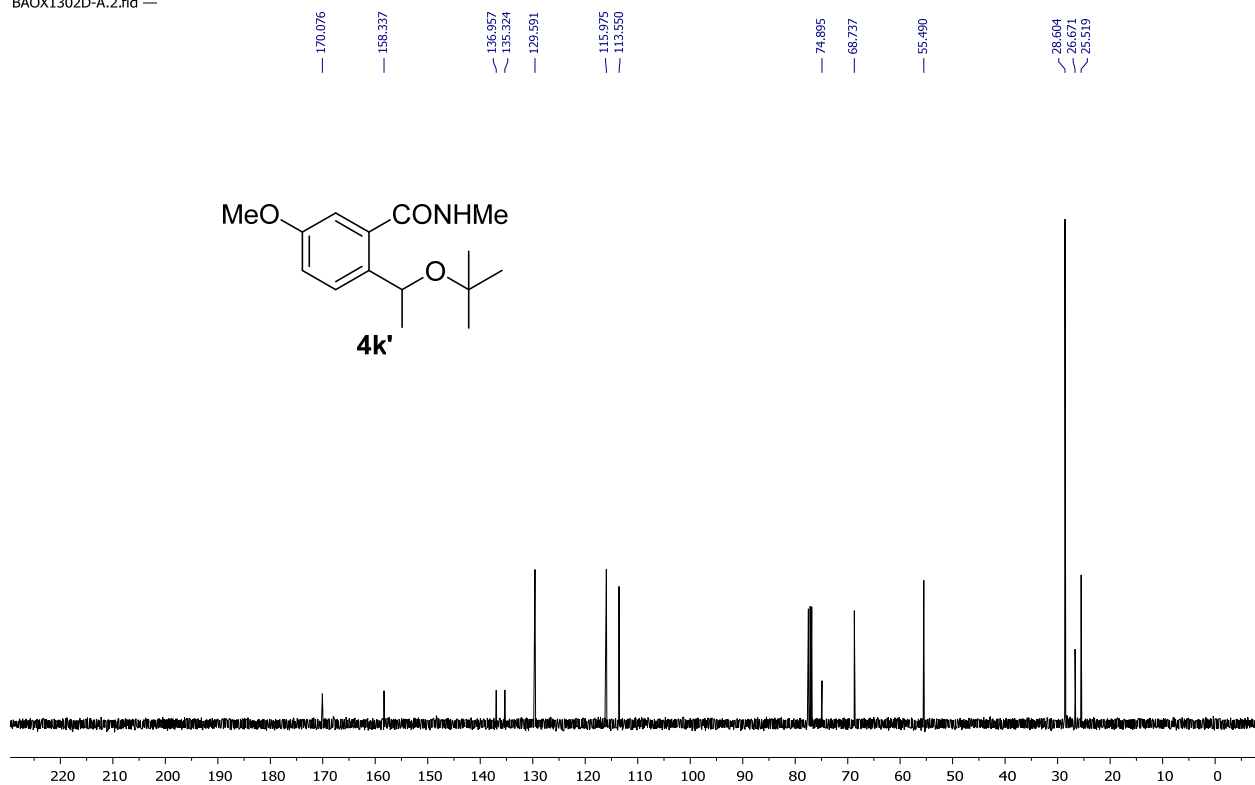

Supplementary Figure 24. <sup>13</sup>C NMR spectra of **4k'**

BAOX1302C.1.fid

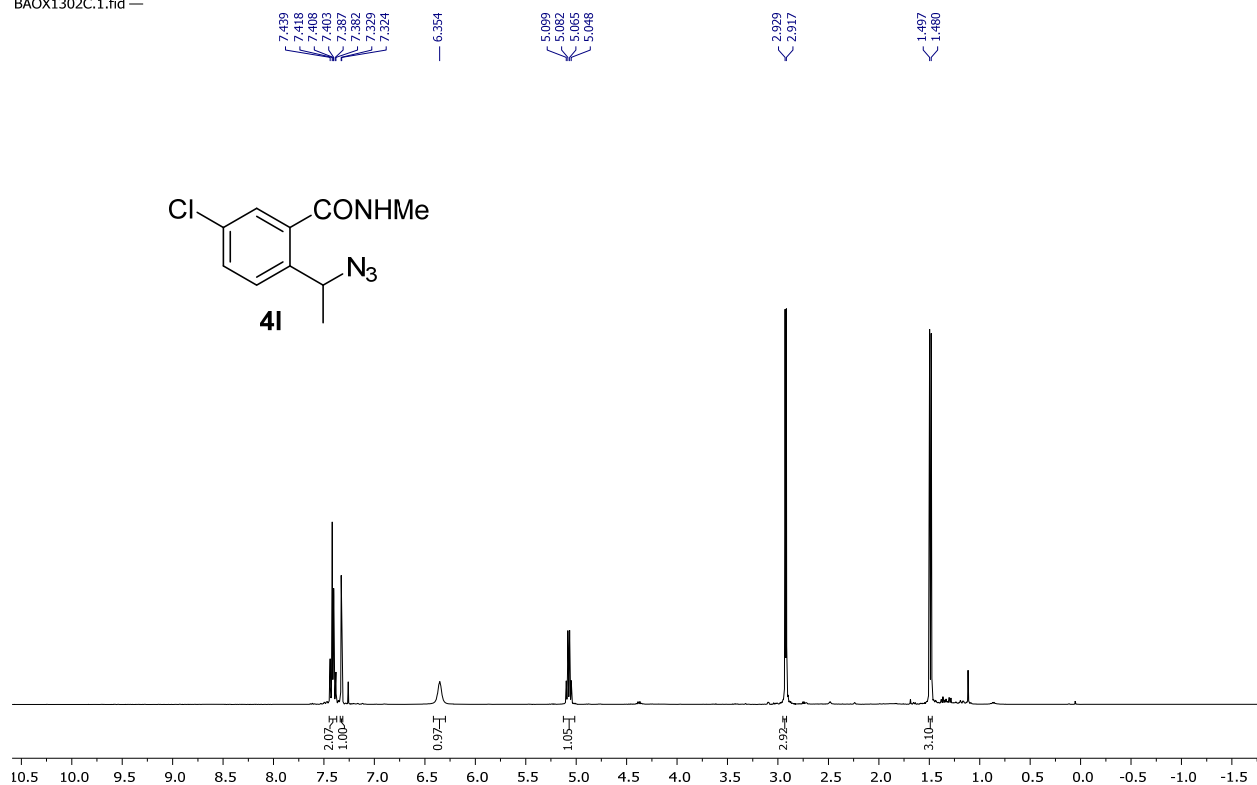

Supplementary Figure 25. <sup>1</sup>H spectra of **4I**

BAOX1302C.2.fid

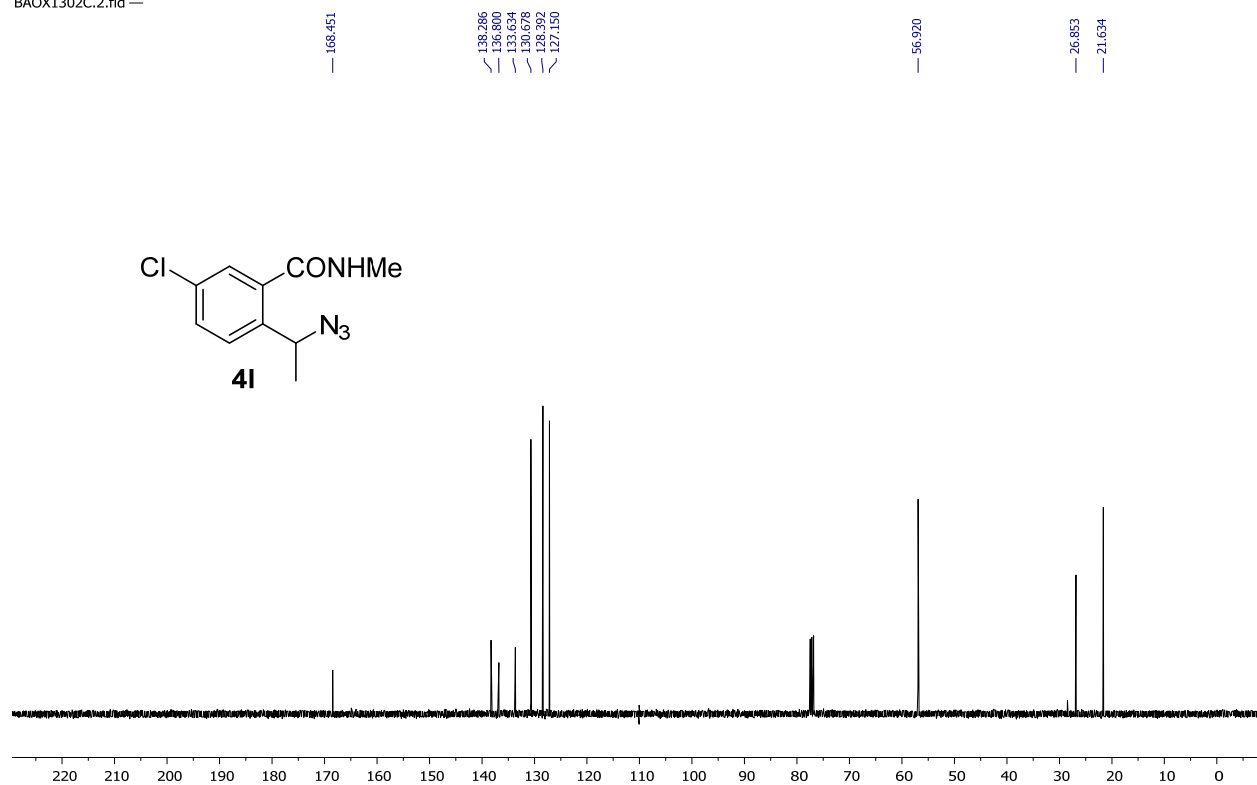

Supplementary Figure 26. <sup>13</sup>C NMR spectra of **4I**

BAOX1302E.1.fid

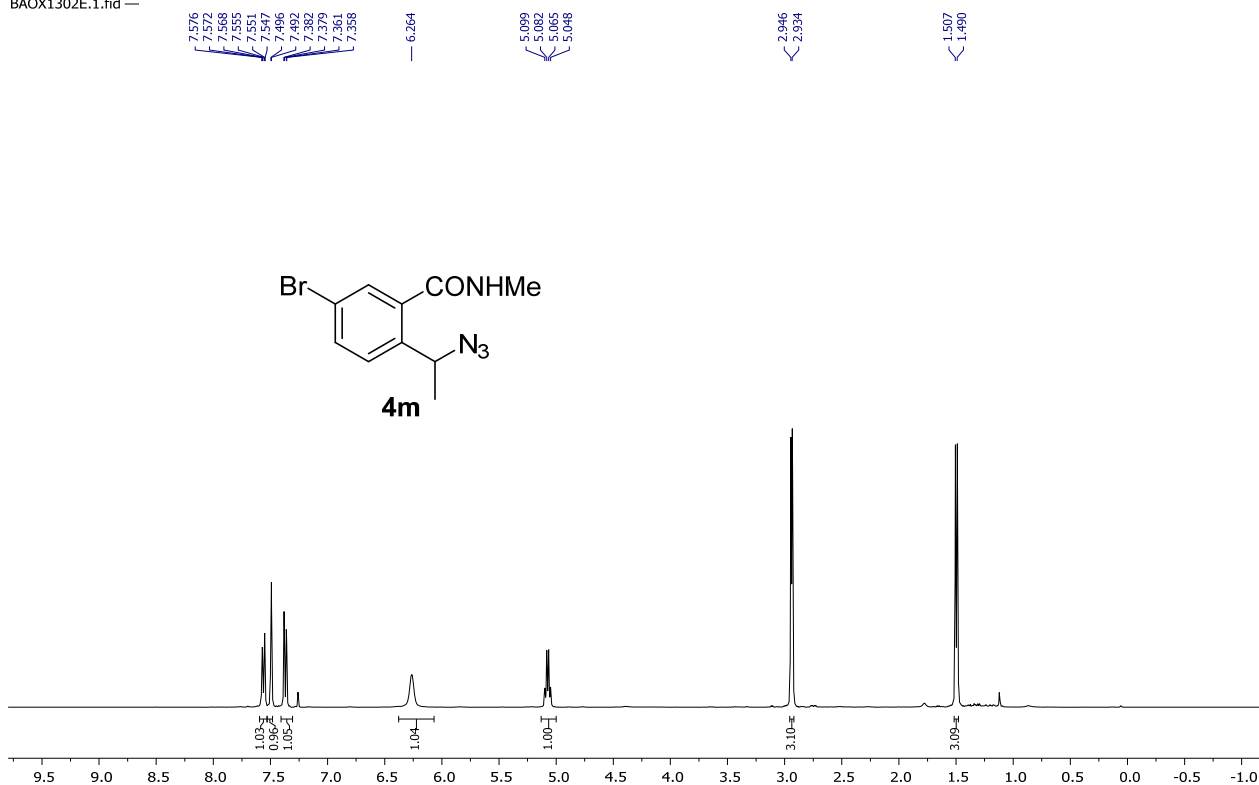

Supplementary Figure 27. <sup>1</sup>H spectra of 4m

BAOX1302E.2.fid

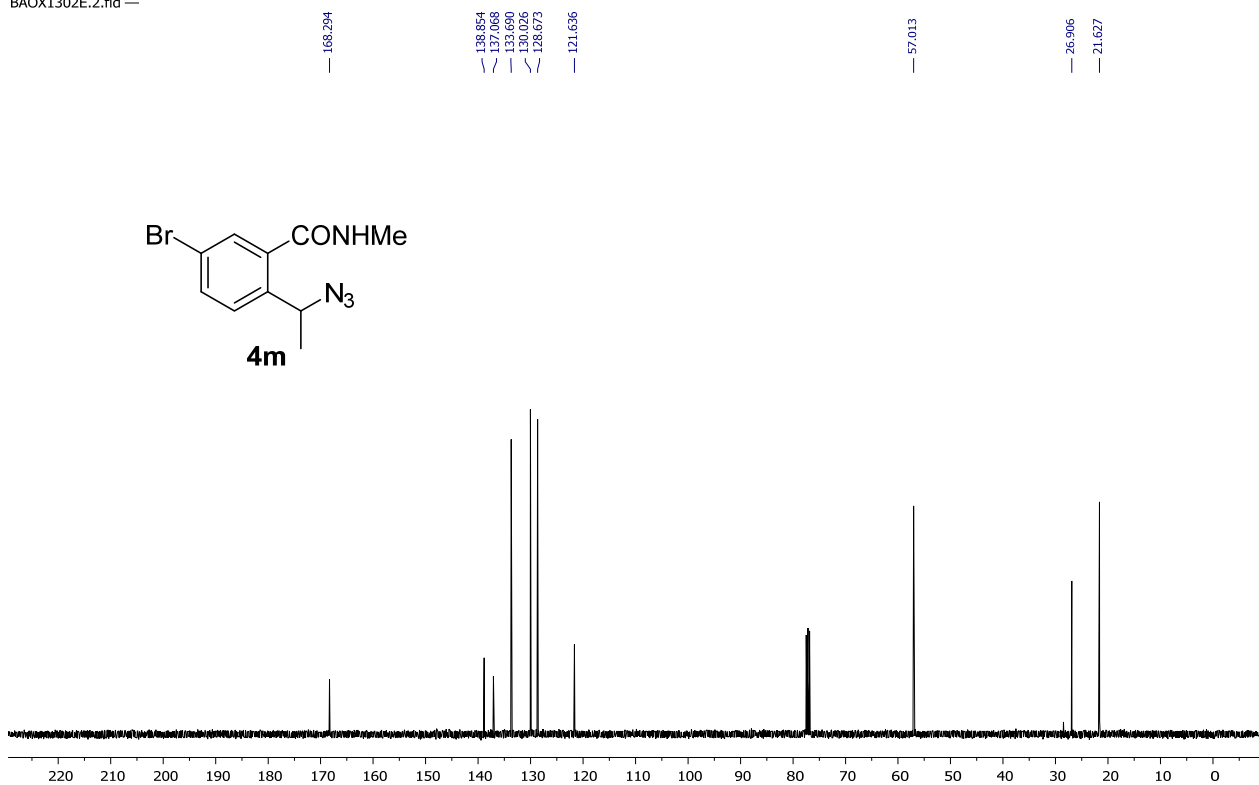

Supplementary Figure 28. <sup>13</sup>C NMR spectra of 4m

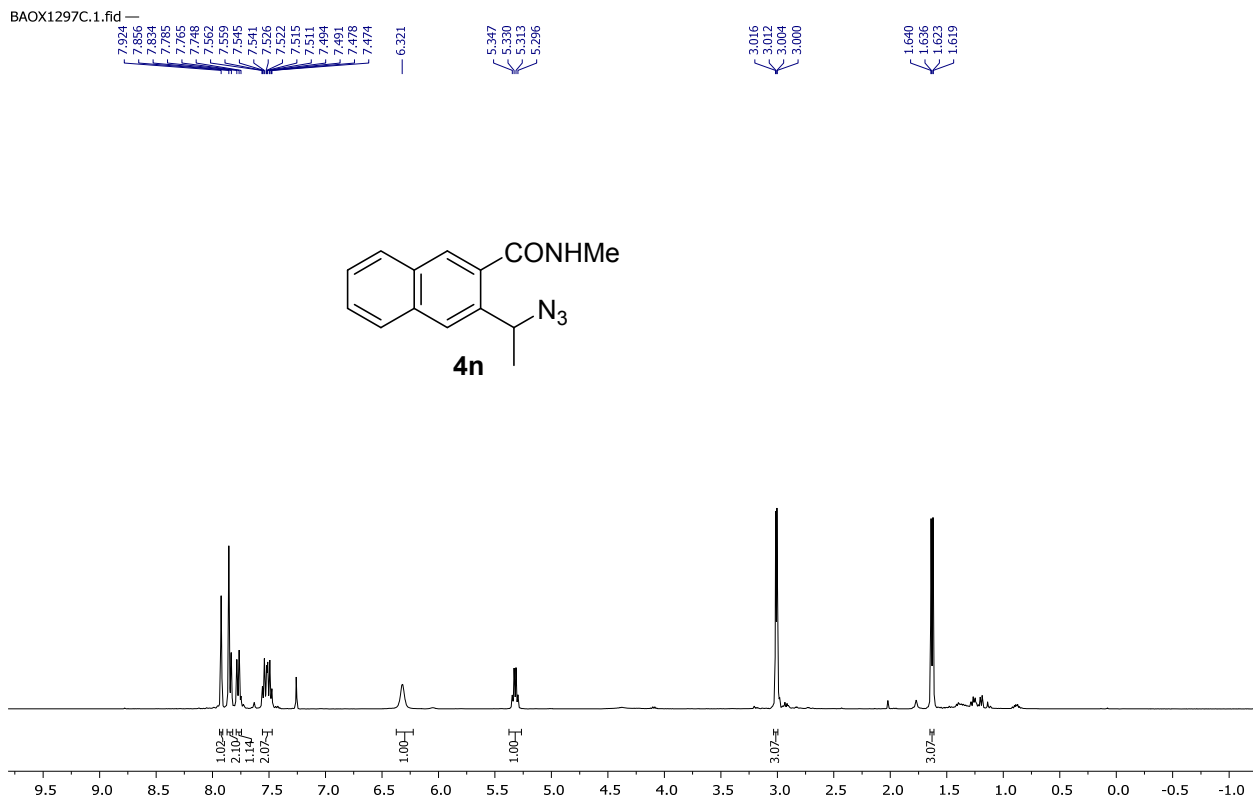

Supplementary Figure 29.  $^1\text{H}$  spectra of **4n**

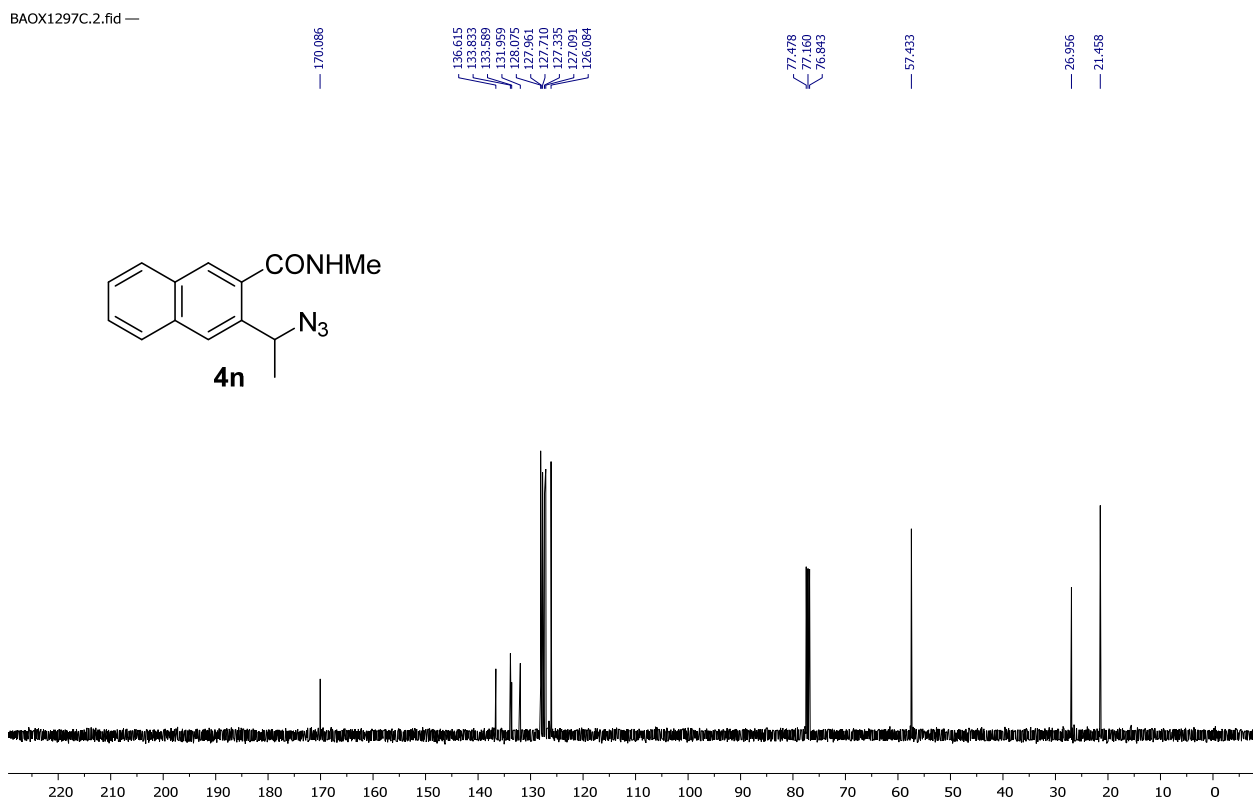

Supplementary Figure 30.  $^{13}\text{C}$  NMR spectra of **4n**



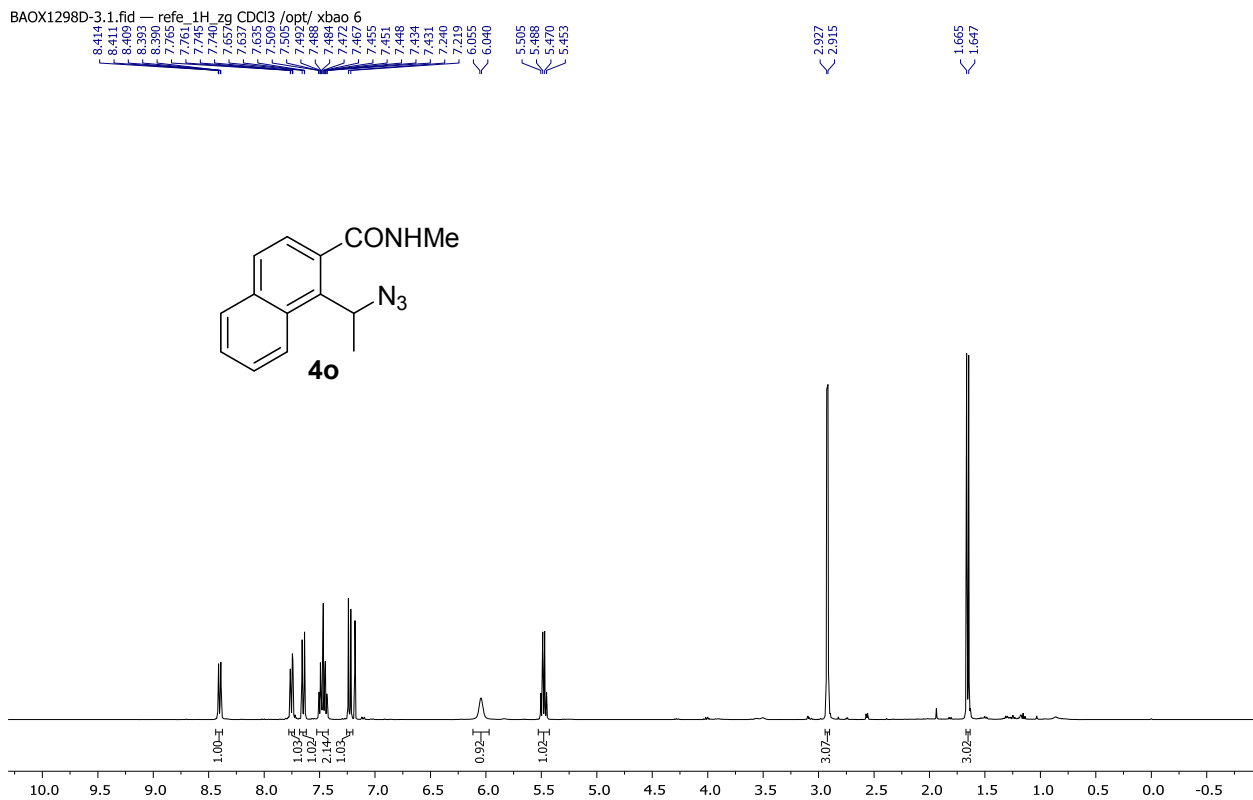

Supplementary Figure 31. <sup>1</sup>H spectra of 4o

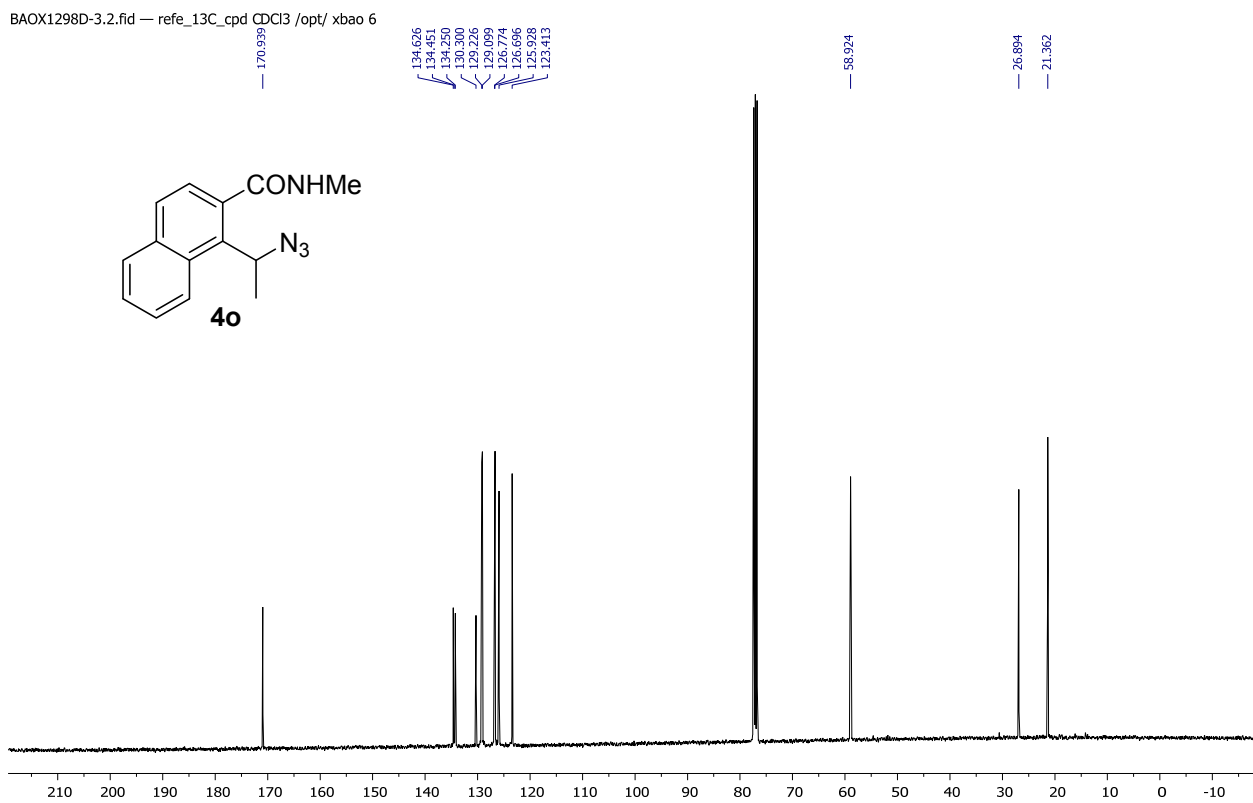

Supplementary Figure 32. <sup>13</sup>C NMR spectra of 4o

BAOX1298H.1.fid — ChemInfo\_1Hzq CDCl3 /opt/ xbao 25

7.465  
7.443  
7.443  
7.416  
7.401  
7.385  
7.381  
7.340  
7.321  
7.277  
7.274  
7.256  
7.237

5.883

5.126  
5.110  
5.093  
5.076

3.452  
3.436  
3.418  
3.401  
3.384

1.513  
1.496  
1.209  
1.191  
1.173

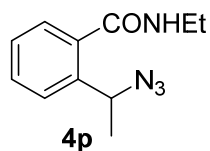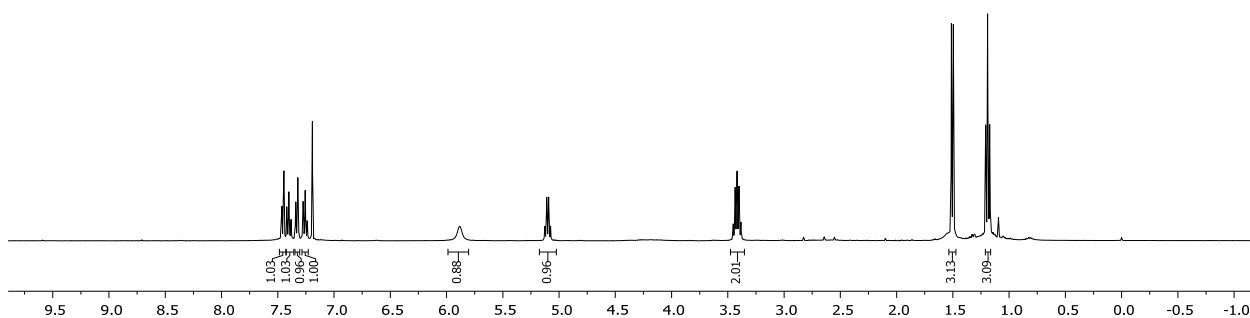

Supplementary Figure 33. <sup>1</sup>H spectra of 4p

BAOX1298H.2.fid — ChemInfo\_13C\_cpd CDCl3 /opt/ xbao 25

169.188

139.628  
135.755  
130.765  
127.049  
127.064  
126.857

57.497

35.083

21.620

14.993

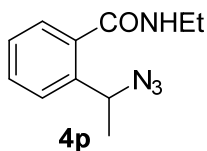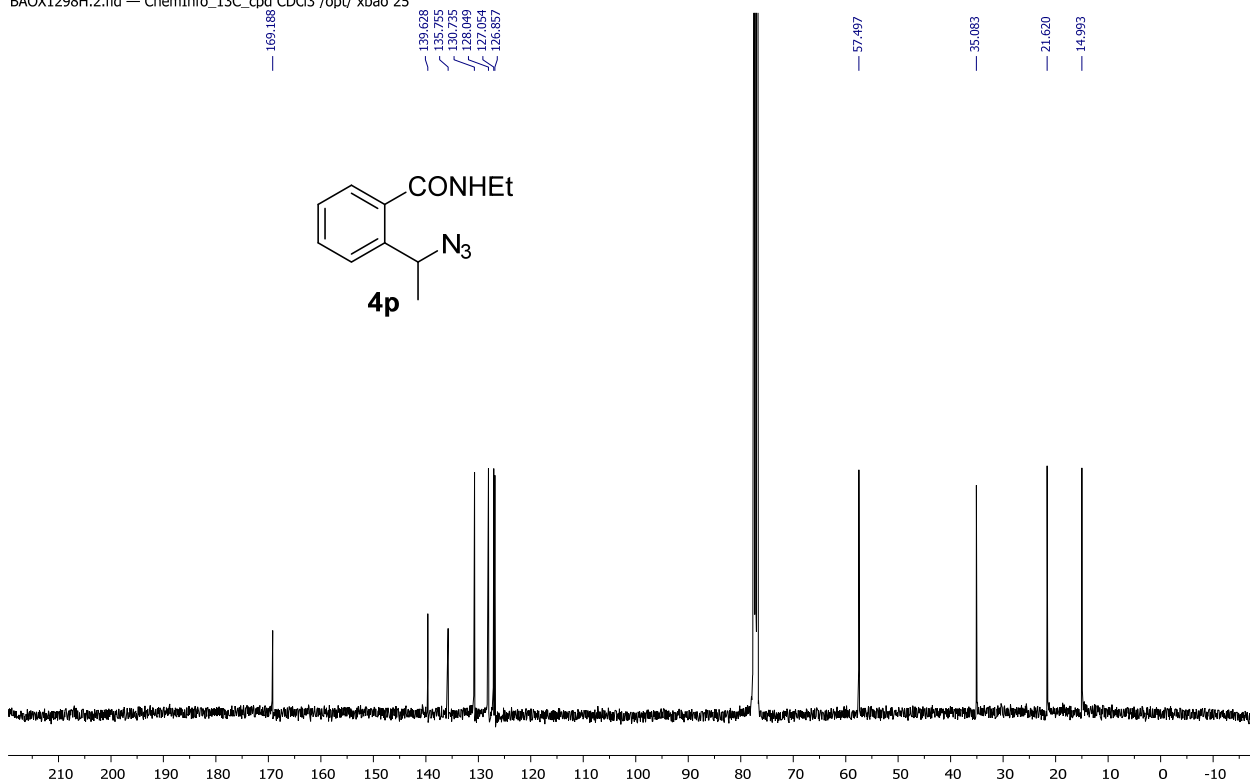

Supplementary Figure 34. <sup>13</sup>C NMR spectra of 4p

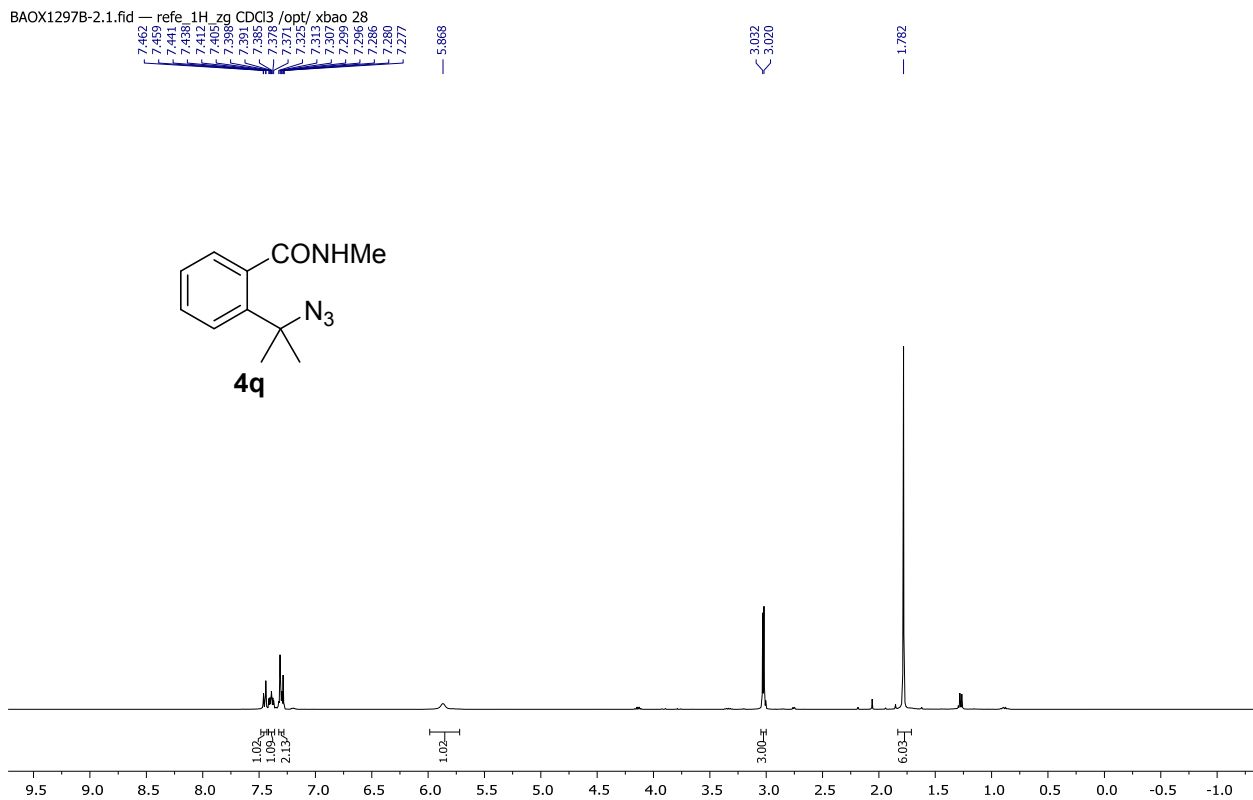

Supplementary Figure 35. <sup>1</sup>H spectra of 4q

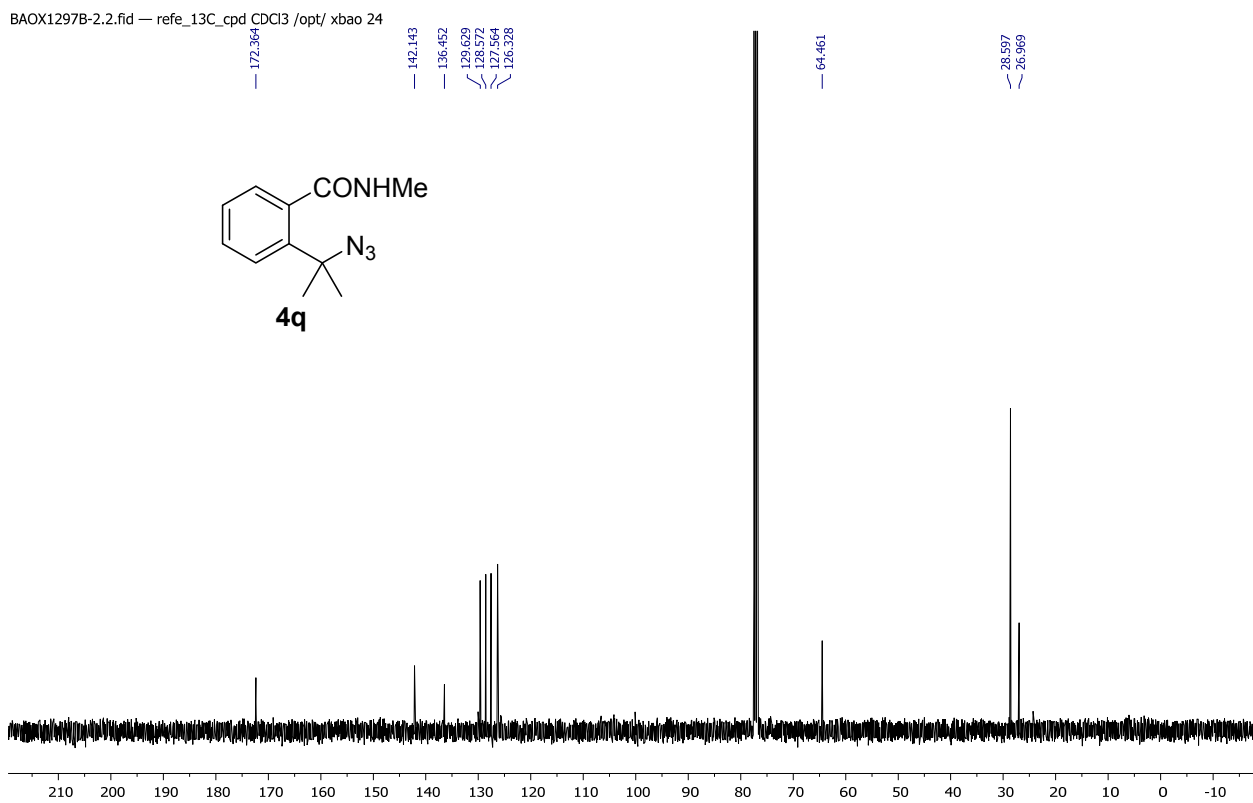

Supplementary Figure 36. <sup>13</sup>C NMR spectra of 4q

BAOX1297A.2.fid

7.500  
7.481  
7.466  
7.450  
7.447  
7.432  
7.388  
7.379  
7.362  
7.358  
7.344  
7.340

6.184

4.570

2.994  
2.982

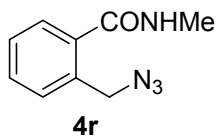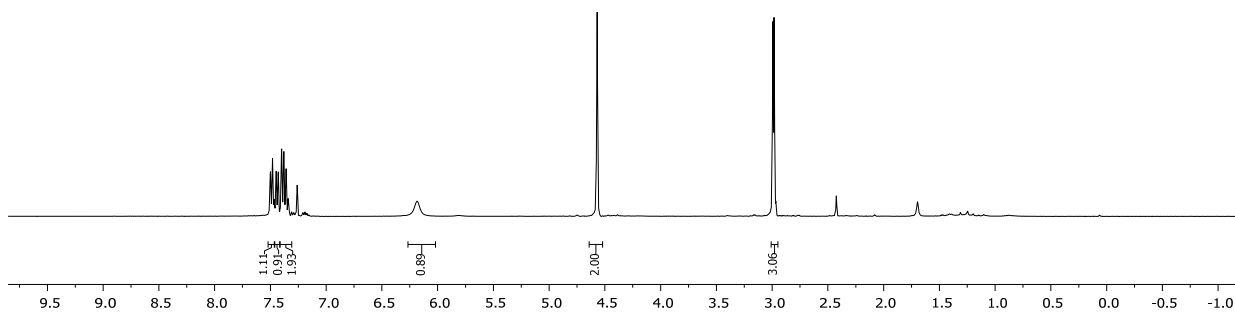

Supplementary Figure 37. <sup>1</sup>H spectra of 4r

BAOX1297A.3.fid

169.543

135.999  
130.711  
130.193  
128.601  
127.785

52.751

26.909

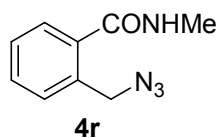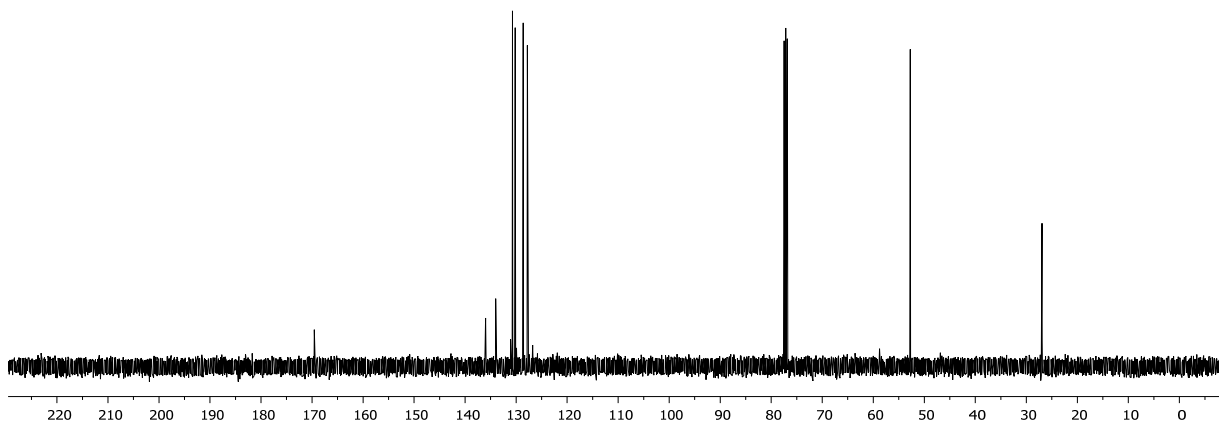

Supplementary Figure 38. <sup>13</sup>C NMR spectra of 4r

BAOX1296C.1.fid — ChemInfo\_1Hzq CDCl3 /opt/ xbao 38

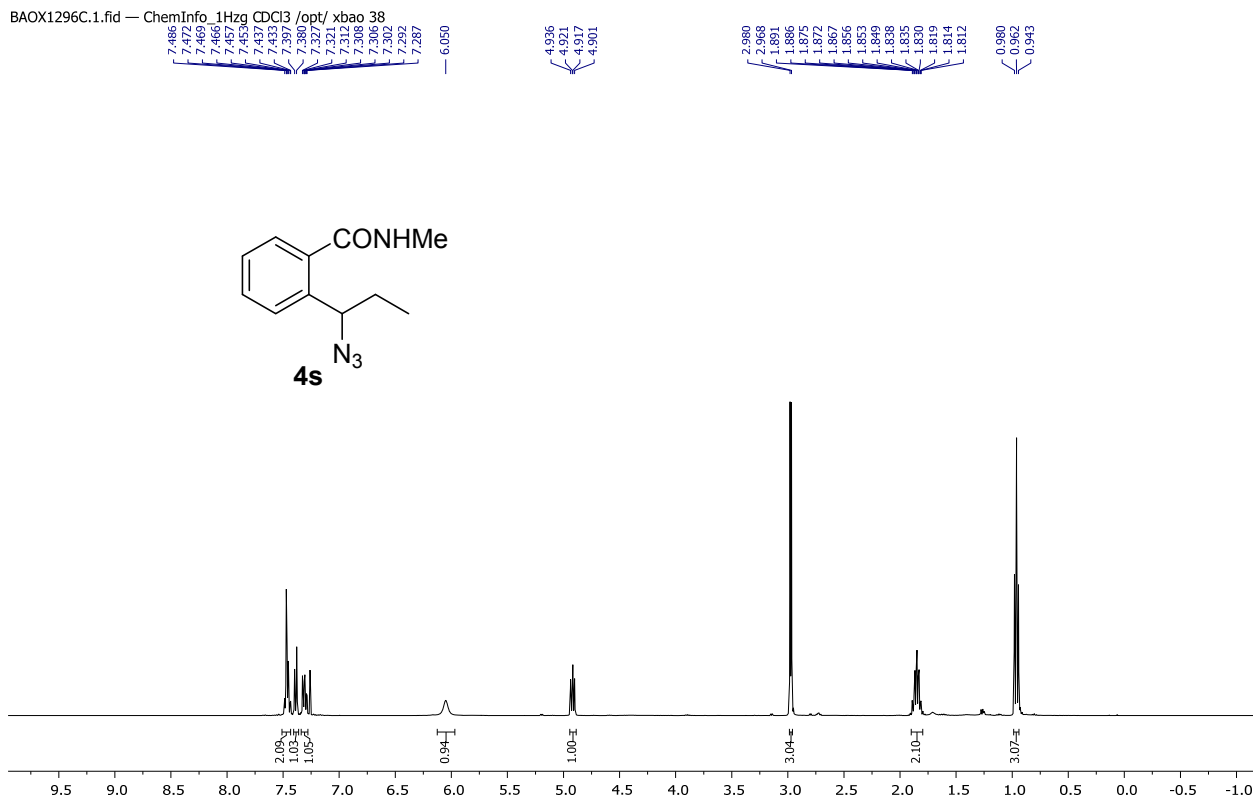

Supplementary Figure 39. <sup>1</sup>H spectra of **4s**

BAOX1296C.2.fid — ChemInfo\_13C\_cpq CDCl3 /opt/ xbao 38

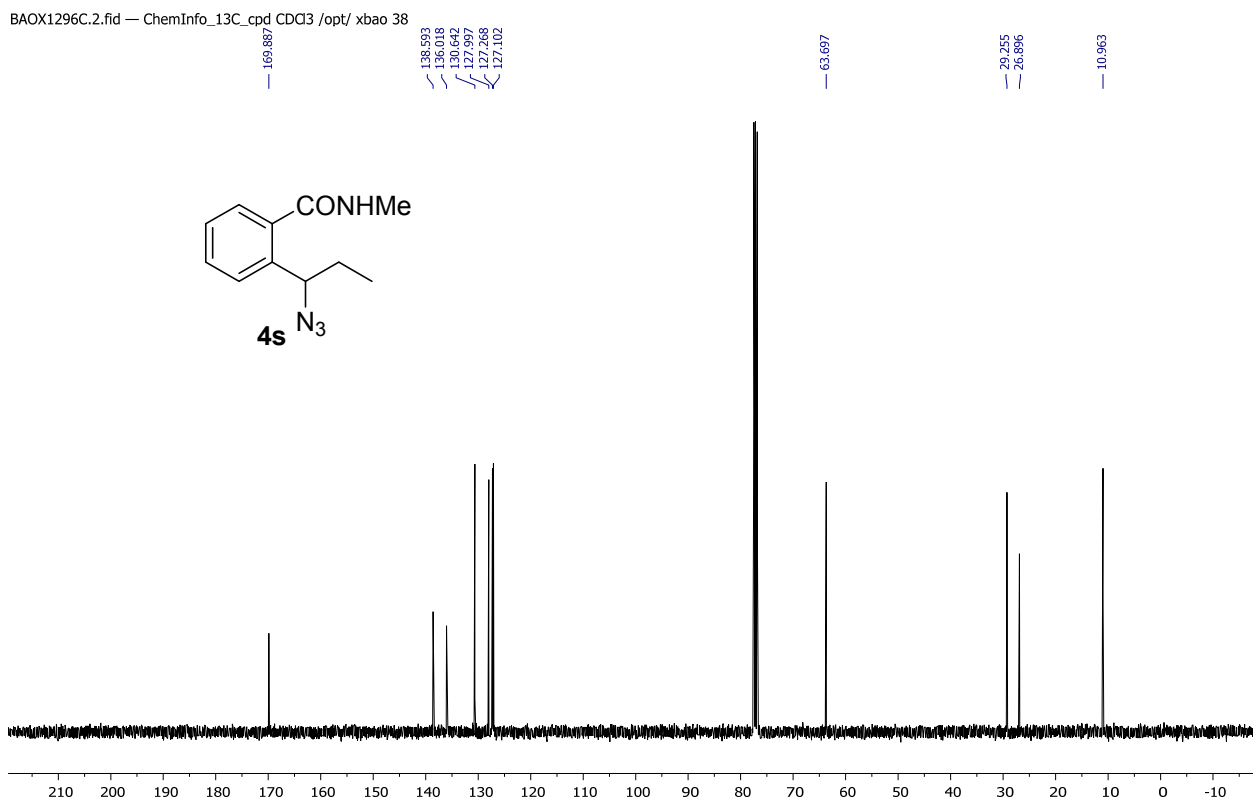

Supplementary Figure 40. <sup>13</sup>C NMR spectra of **4s**

BAOX1302F-2.1.fid —

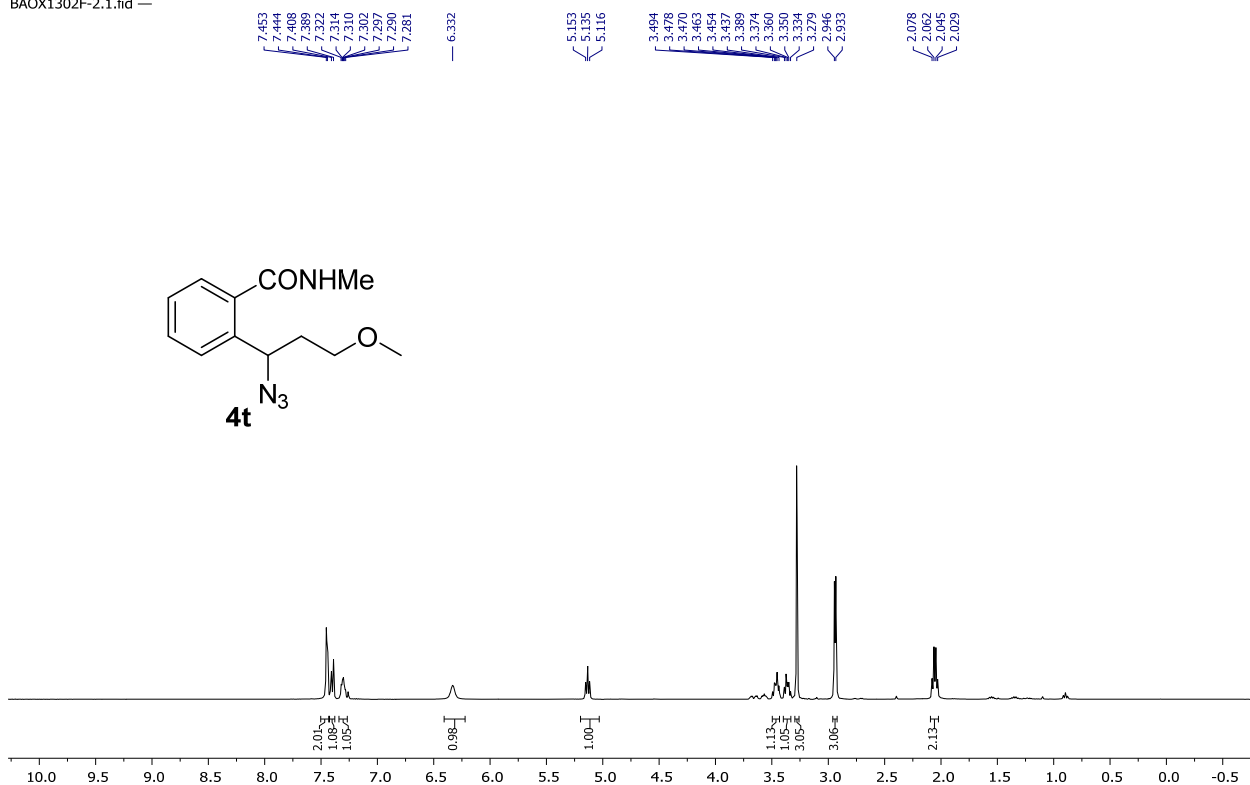

Supplementary Figure 41. <sup>1</sup>H spectra of 4t

BAOX1302F.2.fid —

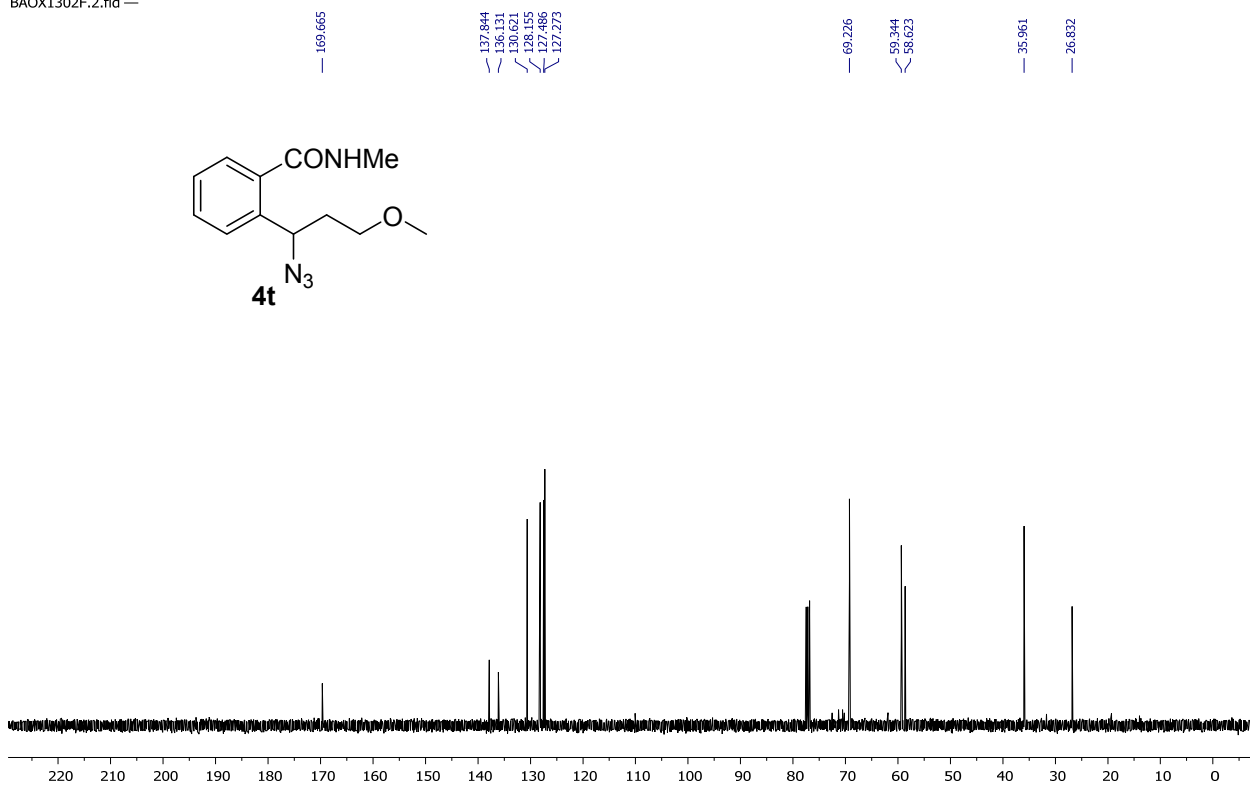

Supplementary Figure 42. <sup>13</sup>C NMR spectra of 4t

BAOX1317C.1.fid — ChemInfo\_1Hzq CDCl3 /opt/ xbao 24

7.468  
7.4658  
7.4516  
7.4216  
7.409  
7.407  
7.404  
7.396  
7.357  
7.353  
7.335  
7.325  
7.314  
7.305  
7.299  
7.293  
7.286  
7.282  
7.277  
7.271  
6.200  
5.203  
5.185  
5.166  
4.453  
3.632  
3.616  
3.607  
3.600  
3.592  
3.576  
3.570  
3.505  
3.496  
3.489  
3.465  
2.841  
2.829  
2.169  
2.163  
2.154  
2.147  
2.139  
2.134  
2.131  
2.119  
2.115

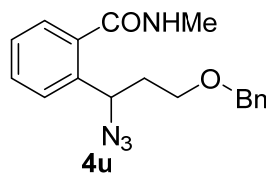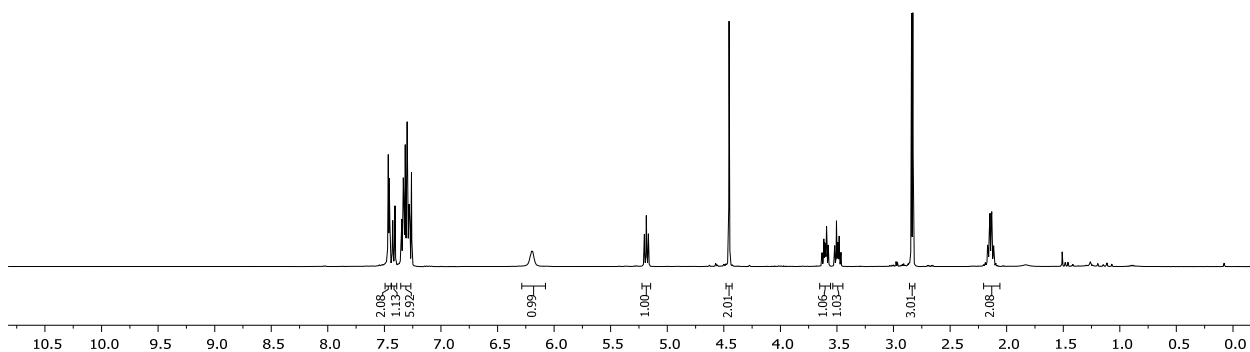

Supplementary Figure 43. <sup>1</sup>H spectra of 4u

BAOX1317C.2.fid — ChemInfo\_13C\_cpd CDCl3 /opt/ xbao 24

169.638  
138.130  
137.561  
136.603  
130.600  
128.486  
128.223  
127.876  
127.789  
127.686  
127.319  
73.112  
67.030  
59.400  
35.894  
26.709

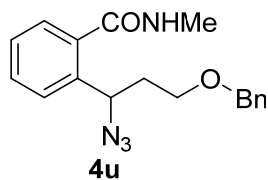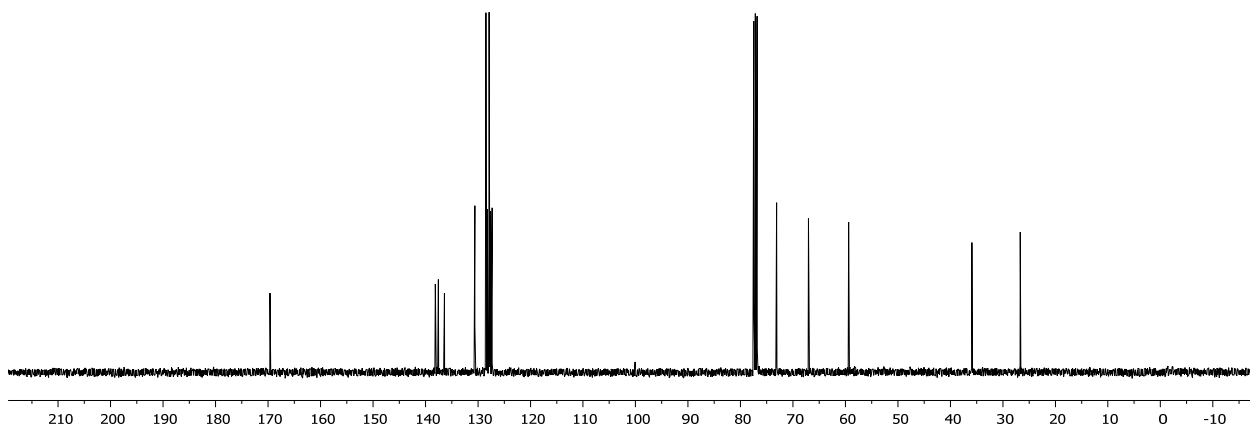

Supplementary Figure 44. <sup>13</sup>C NMR spectra of 4u

BAOX1188E.1.fid — ChemInfo\_1Hzq CDCl3 /opt/ xbao 26

7.601  
7.595  
7.574  
7.567  
7.561  
7.556  
7.551  
7.4678  
7.451  
7.448  
7.434  
7.411  
7.408  
7.396  
7.390  
7.374  
7.371  
6.201  
6.185  
6.169  
6.161  
6.153  
6.145  
6.129  
6.113  
5.880

3.007  
2.995

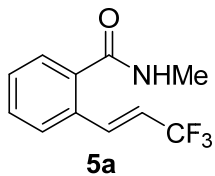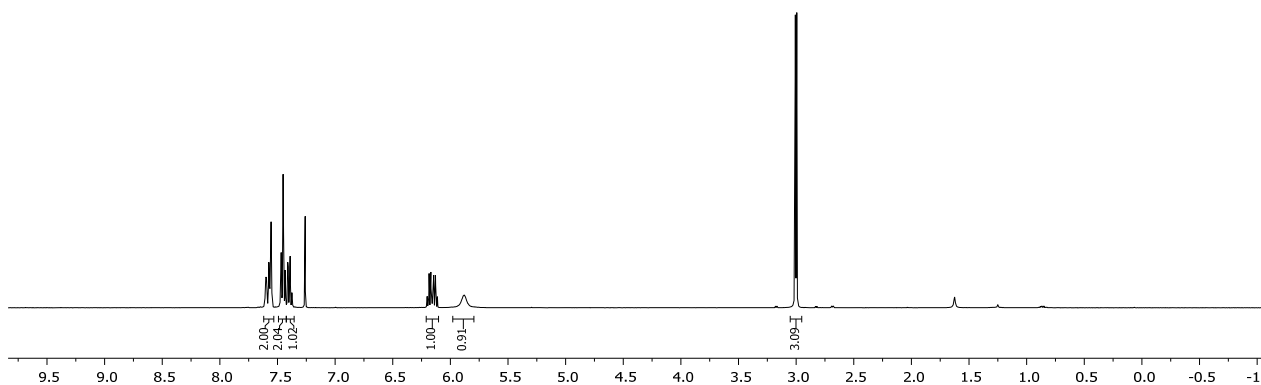

Supplementary Figure 45. <sup>1</sup>H spectra of 5a

BAOX1188E.2.fid — ChemInfo\_13C\_cpnd CDCl3 /opt/ xbao 26

169.298  
136.669  
135.695  
135.627  
135.558  
135.489  
132.158  
130.602  
129.811  
129.811  
127.158  
124.726  
122.050  
118.743  
118.407  
118.069  
117.733

77.478  
76.842

27.019

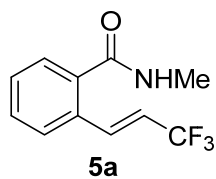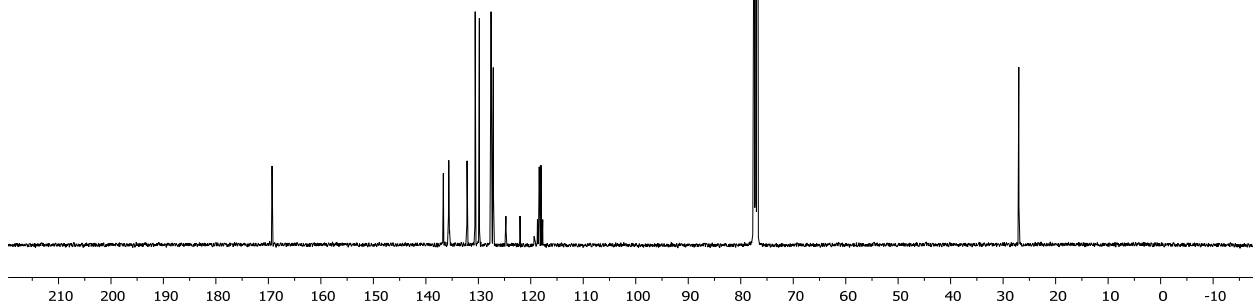

Supplementary Figure 46. <sup>13</sup>C NMR spectra of 5a



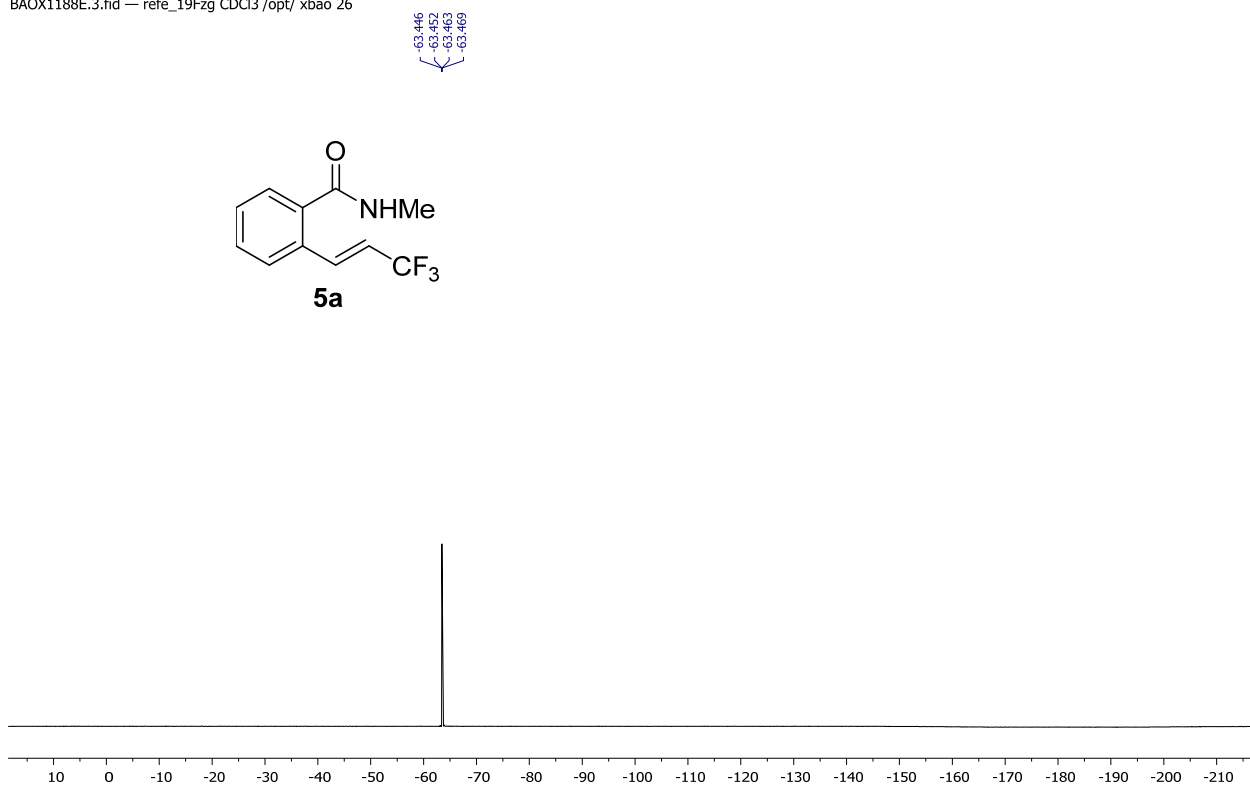

Supplementary Figure 47. <sup>19</sup>F spectra of 5a

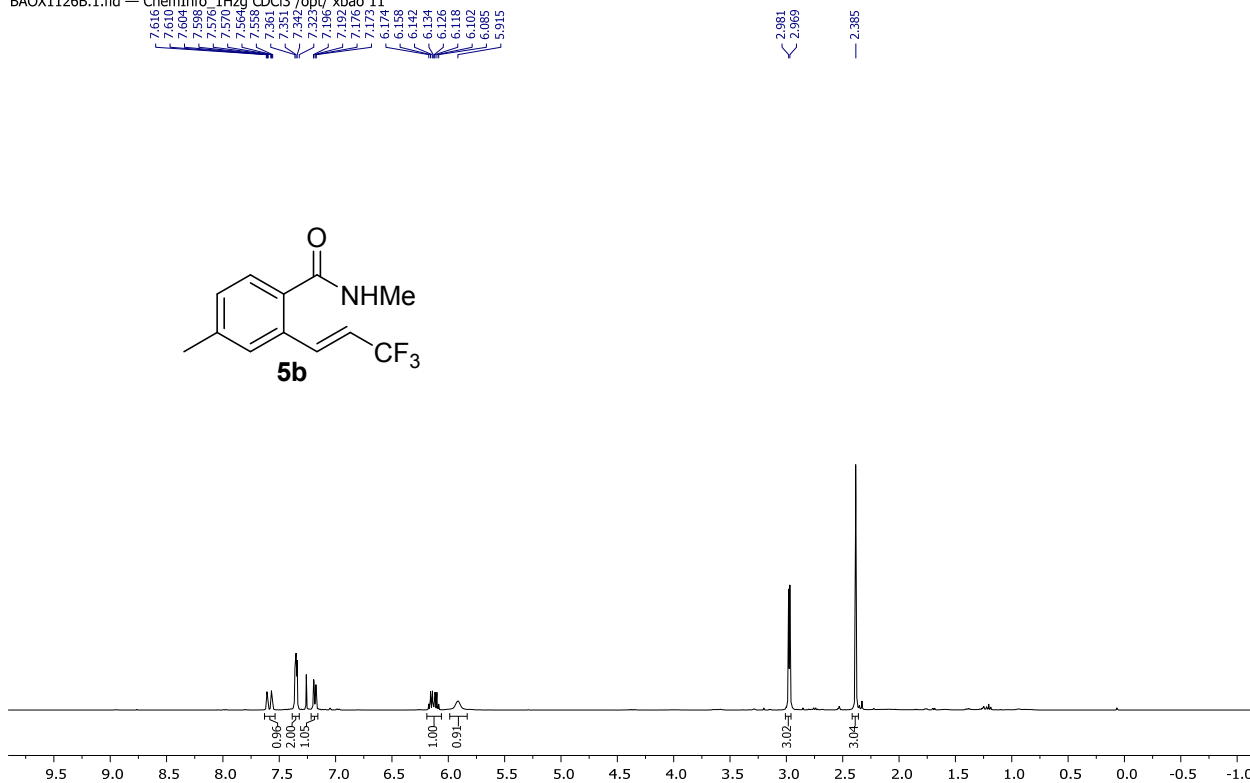

Supplementary Figure 48. <sup>1</sup>H spectra of 5b

BAOX1126B.2.fid — ChemInfo\_13C\_cpd CDCl3 /opt/ xbao 11

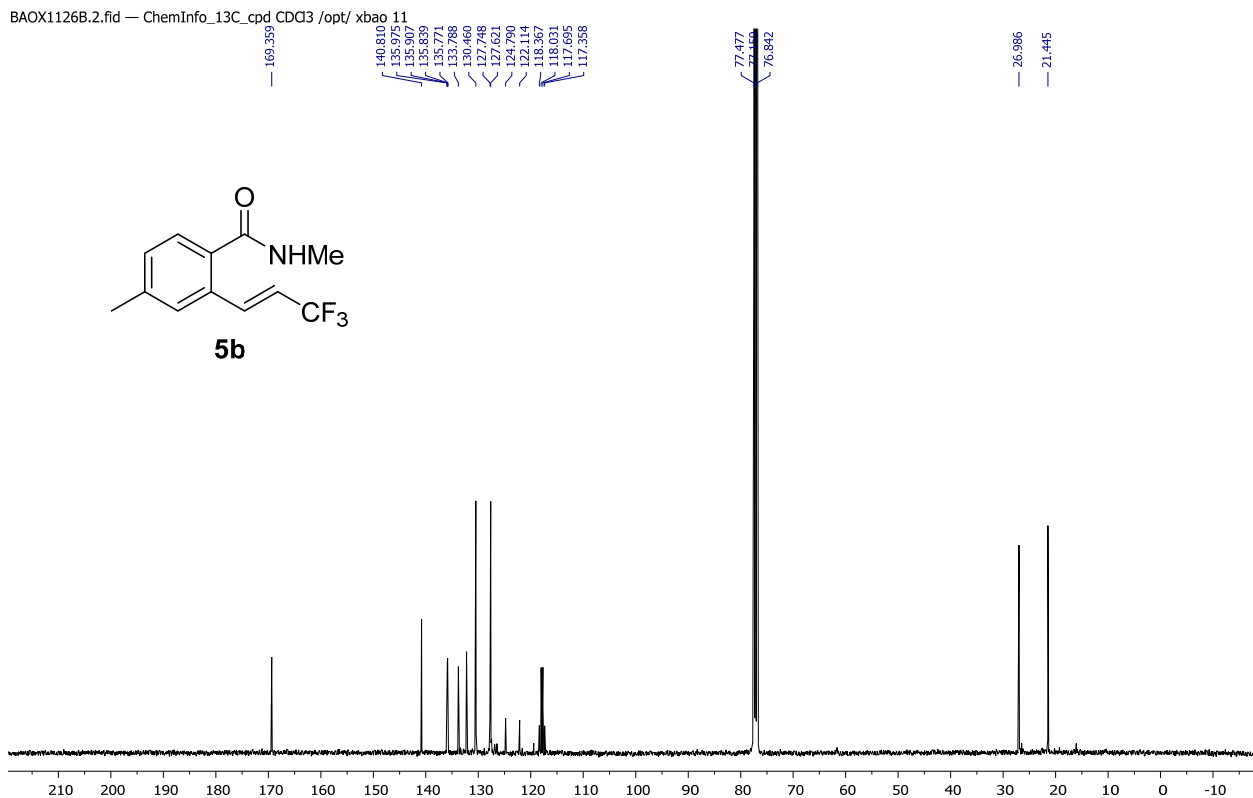

Supplementary Figure 49. <sup>13</sup>C NMR spectra of 5b

BAOX1126B.4.fid — ChemInfo\_19Fzg CDCl3 /opt/ xbao 11

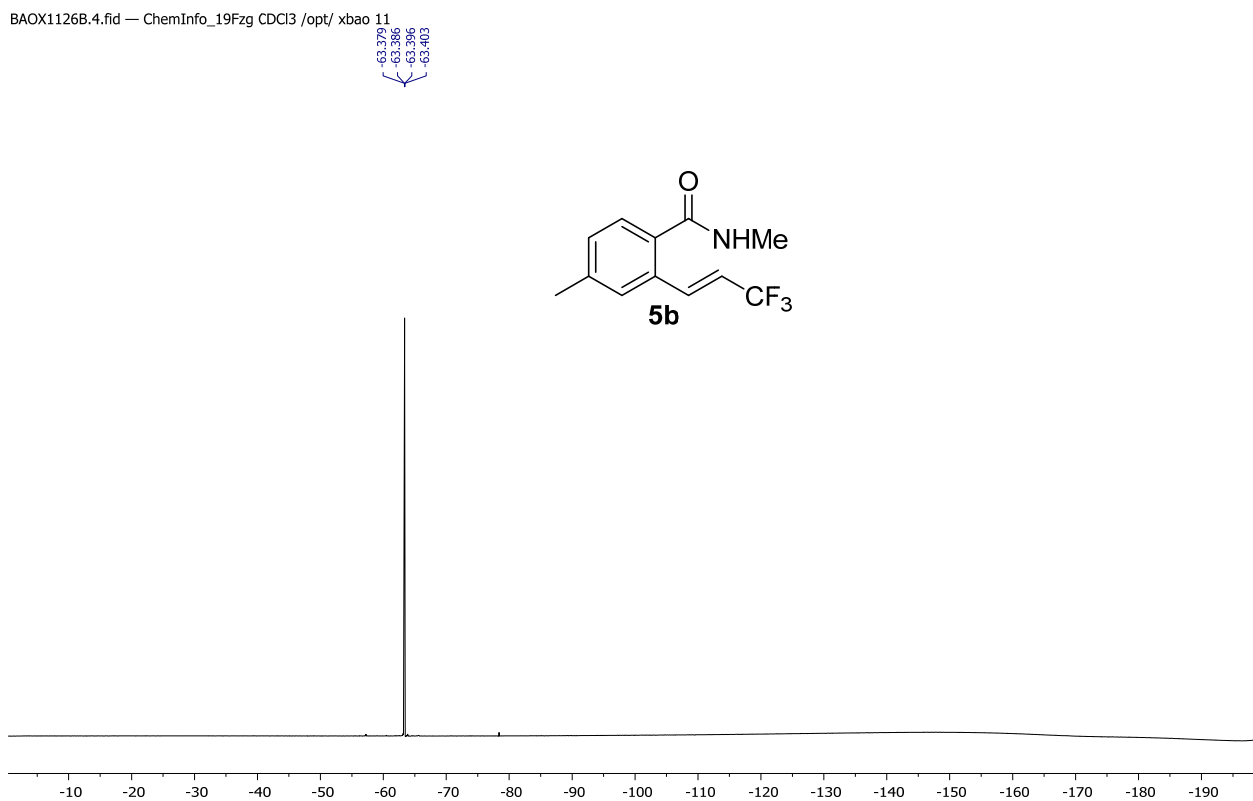

Supplementary Figure 50. <sup>19</sup>F spectra of 5b

BAOX1248A.1.fid — ChemInfo\_1Hzq CDCl3 /opt/ xbao 26

7.737  
7.732  
7.690  
7.684  
7.649  
7.644  
7.638  
7.610  
7.606  
7.591  
7.587  
7.570  
7.568  
7.528  
7.493  
7.475  
7.470  
7.456  
7.432  
7.428  
7.425  
7.417  
6.227  
6.227  
6.211  
6.195  
6.179  
5.961

3.034  
3.022

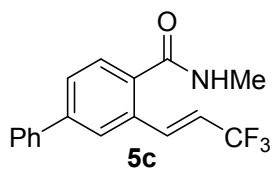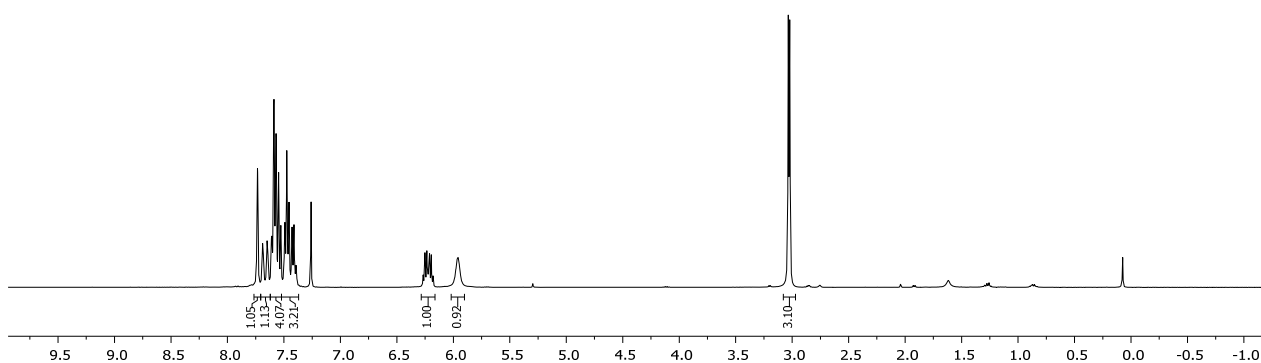

Supplementary Figure 51. <sup>1</sup>H spectra of **5c**

BAOX1248A.2.fid — ChemInfo\_13C\_cpd CDCl3 /opt/ xbao 26

169.119  
143.660  
139.591  
135.912  
135.884  
135.775  
135.159  
132.874  
128.469  
128.411  
128.166  
127.390  
127.281  
125.936  
124.715  
122.038  
118.978  
118.640  
115.354  
117.366

27.064

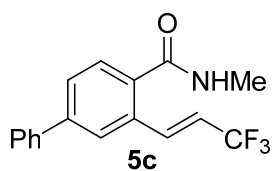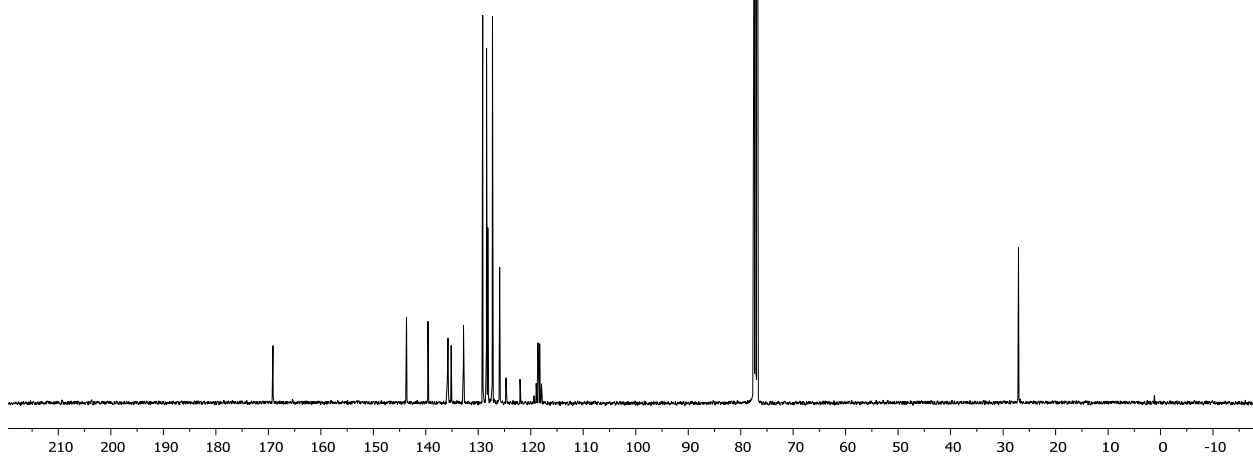

Supplementary Figure 52. <sup>13</sup>C NMR spectra of **5c**

63.404  
63.421

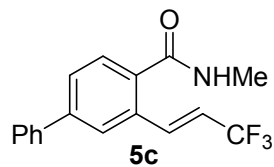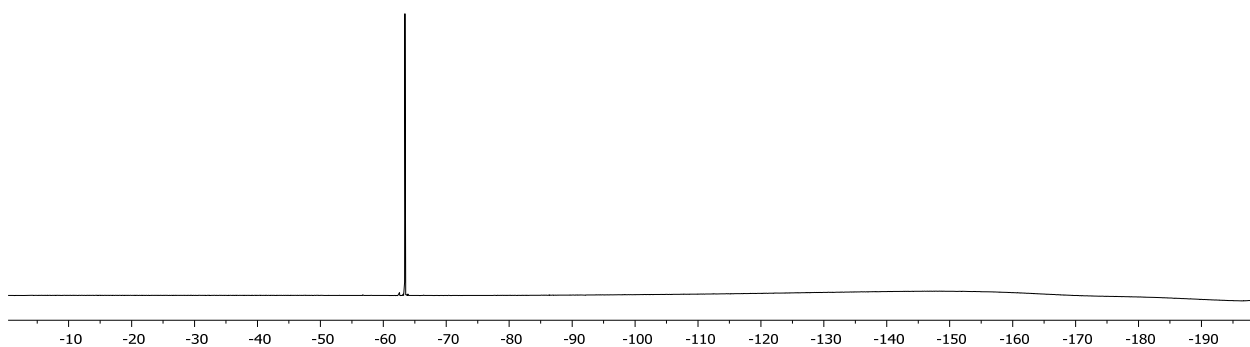

**Supplementary Figure 53. <sup>19</sup>F spectra of 5c**

7.682  
7.676  
7.670  
7.665  
7.641  
7.636  
7.630  
7.625  
7.442  
7.420  
7.400  
7.014  
6.911  
6.905  
6.890  
6.883  
6.164  
6.148  
6.131  
6.115  
6.115  
6.107  
6.091  
6.075  
5.830

3.856

2.987  
2.975

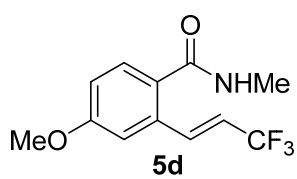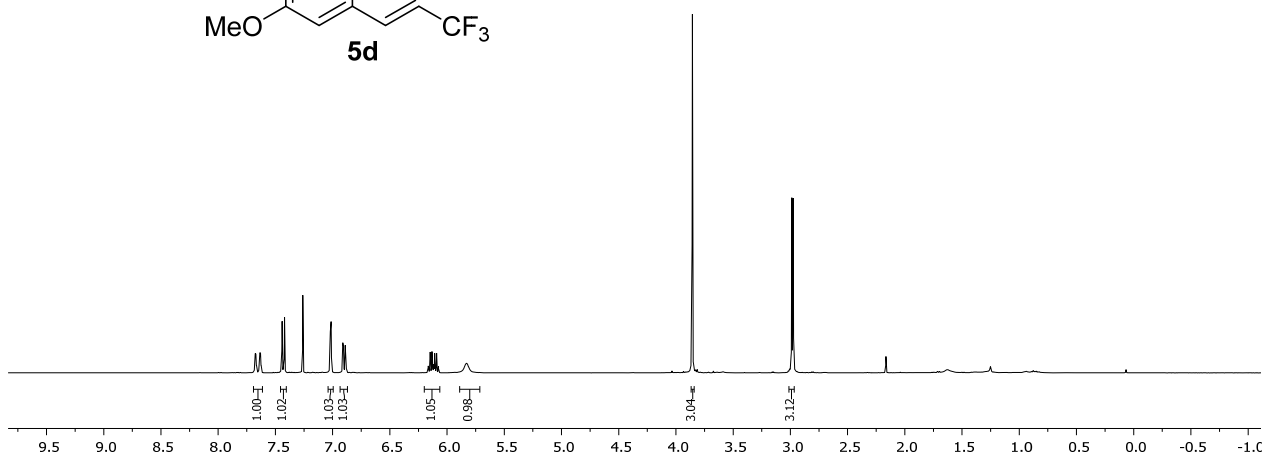

**Supplementary Figure 54. <sup>1</sup>H spectra of 5d**

BAOX1226C.2.fid — ChemInfo\_13C\_cpd CDCl3 /opt/ xbao 23

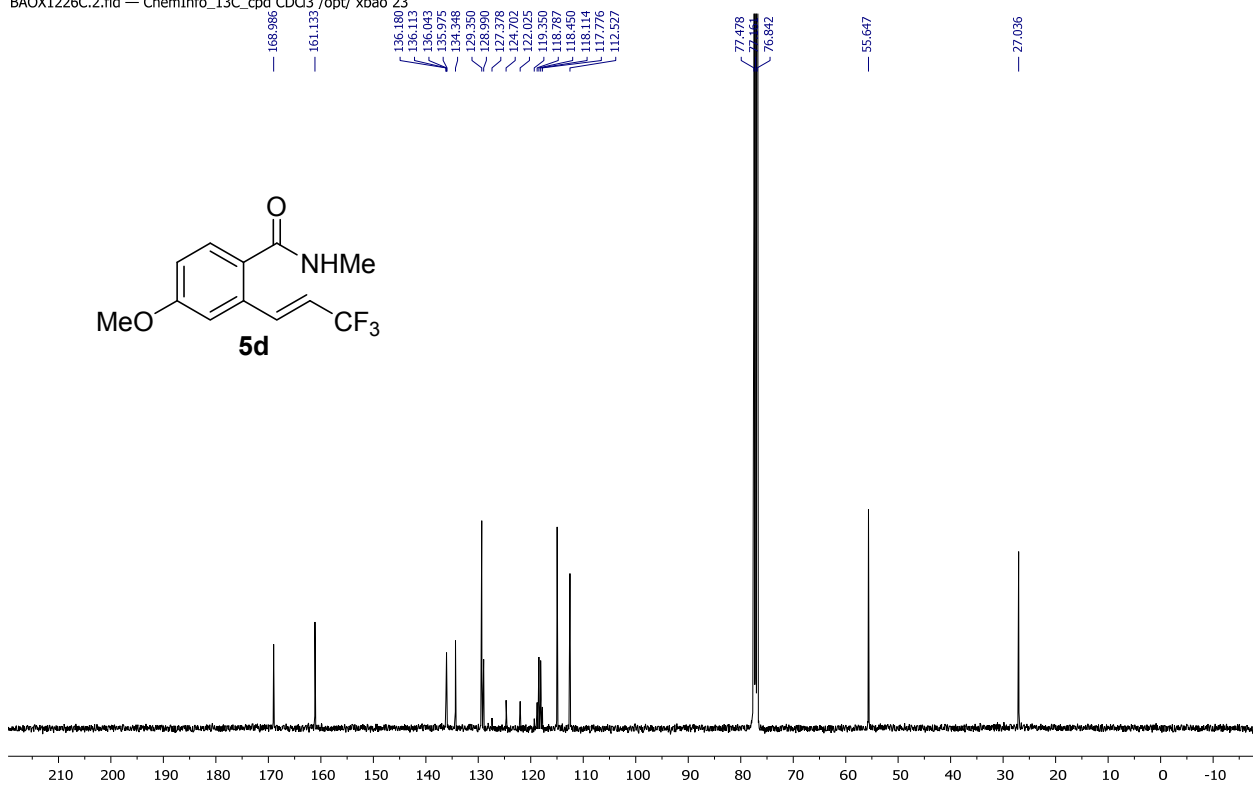

Supplementary Figure 55. <sup>13</sup>C NMR spectra of 5d

BAOX1226C.4.fid — ChemInfo\_19Fzg CDCl3 /opt/ xbao 23

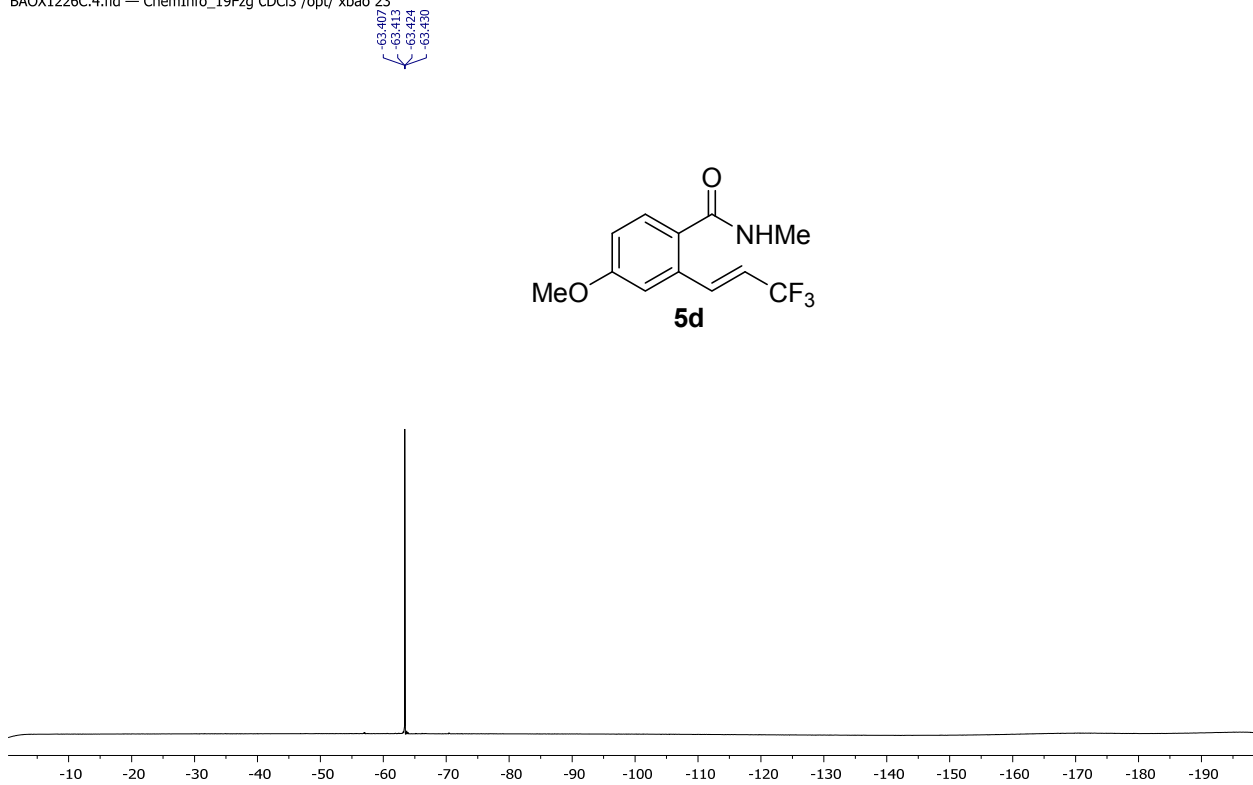

Supplementary Figure 56. <sup>19</sup>F spectra of 5d

BAOX1218B.1.fid — ChemInfo\_1Hzq CDCl3 /opt/ xbao 60

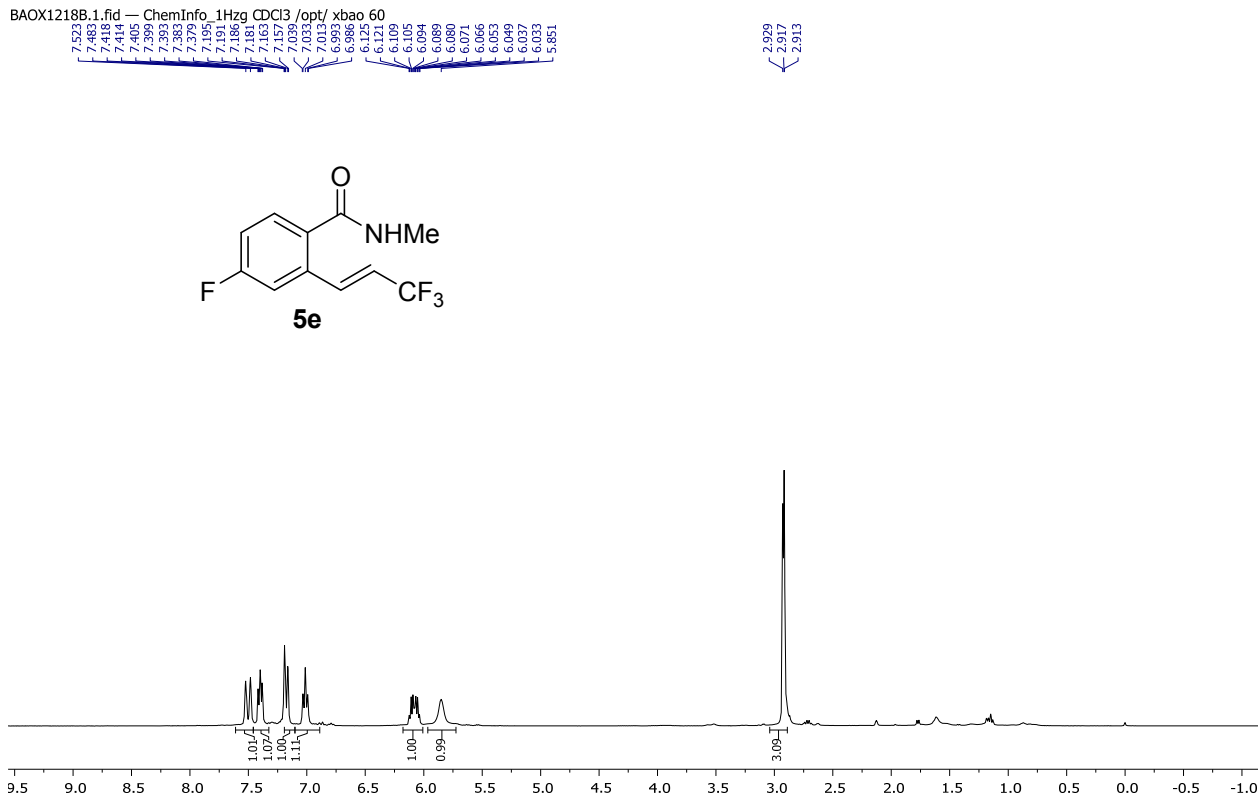

Supplementary Figure 57. <sup>1</sup>H spectra of **5e**

BAOX1218B.2.fid — ChemInfo\_13C\_cpd CDCl3 /opt/ xbao 60

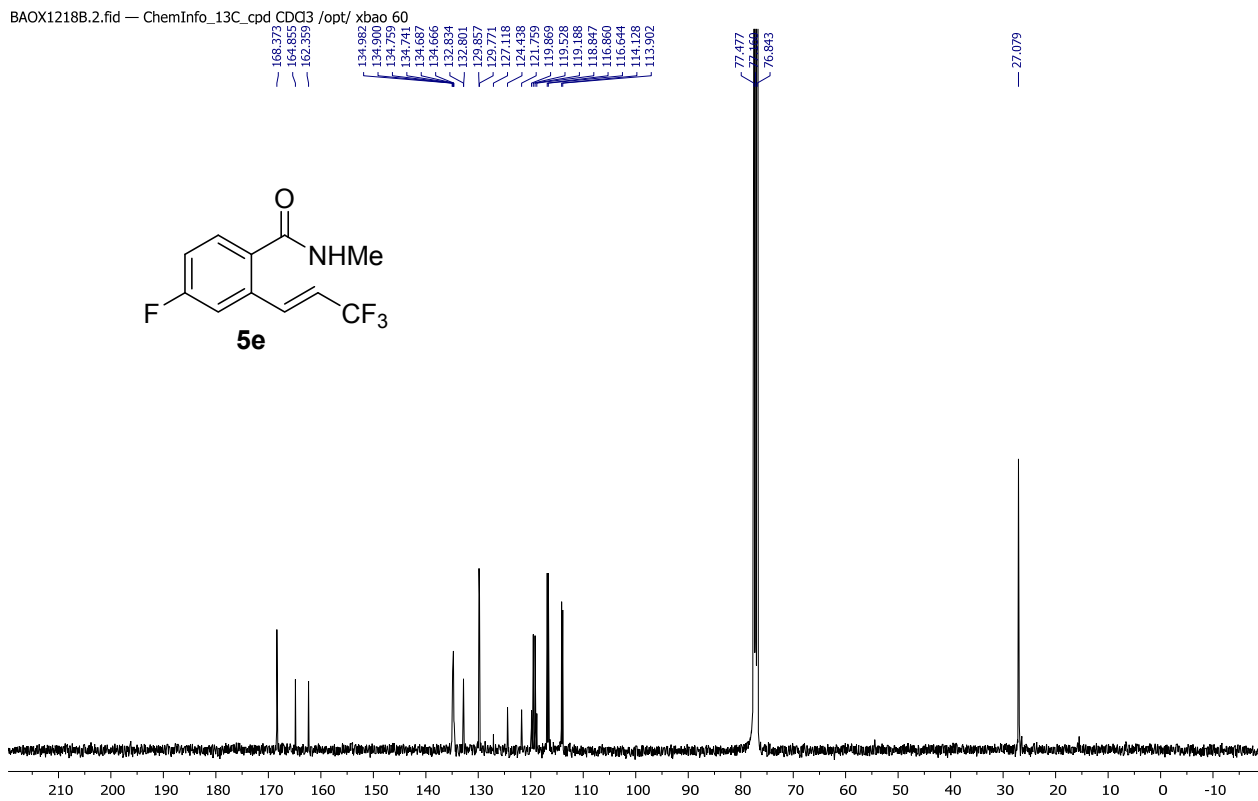

Supplementary Figure 58. <sup>13</sup>C NMR spectra of **5e**

BAOX1218B.5.fid — ChemInfo\_19Fzg CDCl3 /opt/ xbao 60

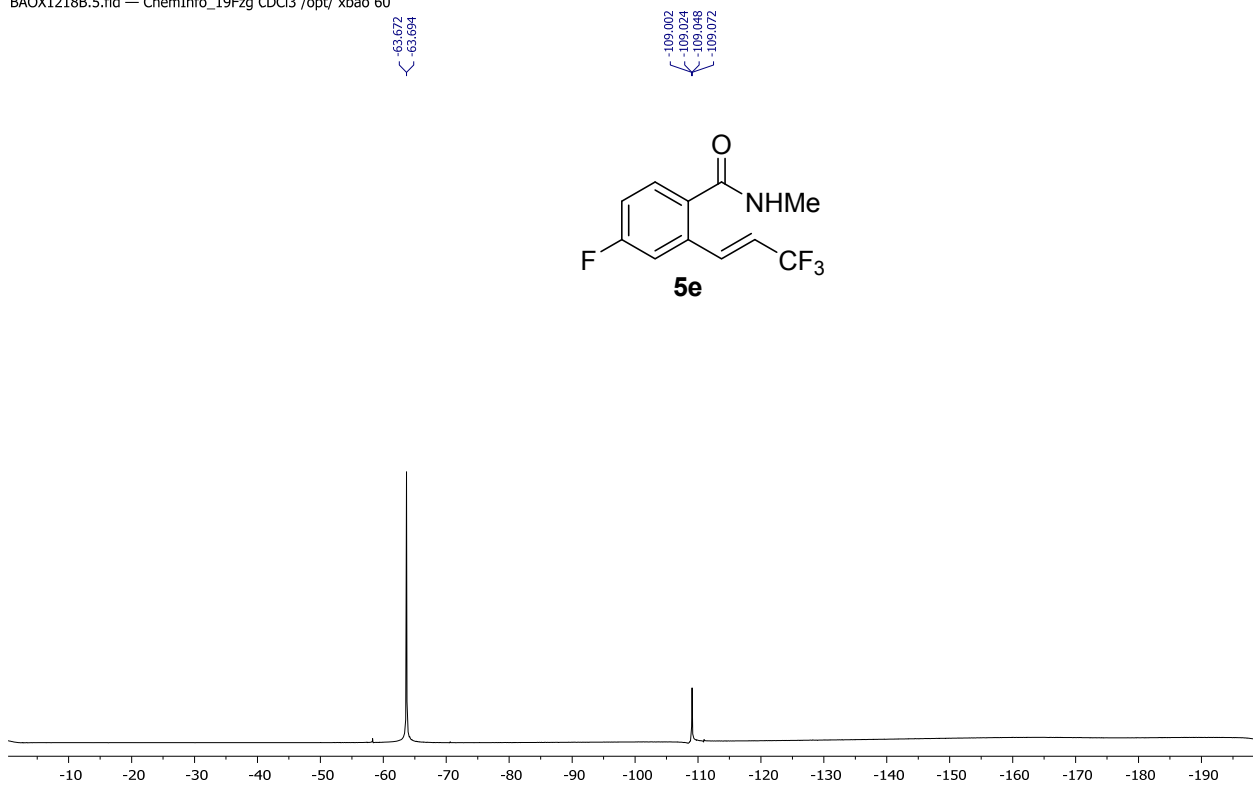

Supplementary Figure 59. <sup>19</sup>F spectra of **5e**

BAOX1218A.11.fid — ChemInfo\_1Hzg CDCl3 /opt/ xbao 60

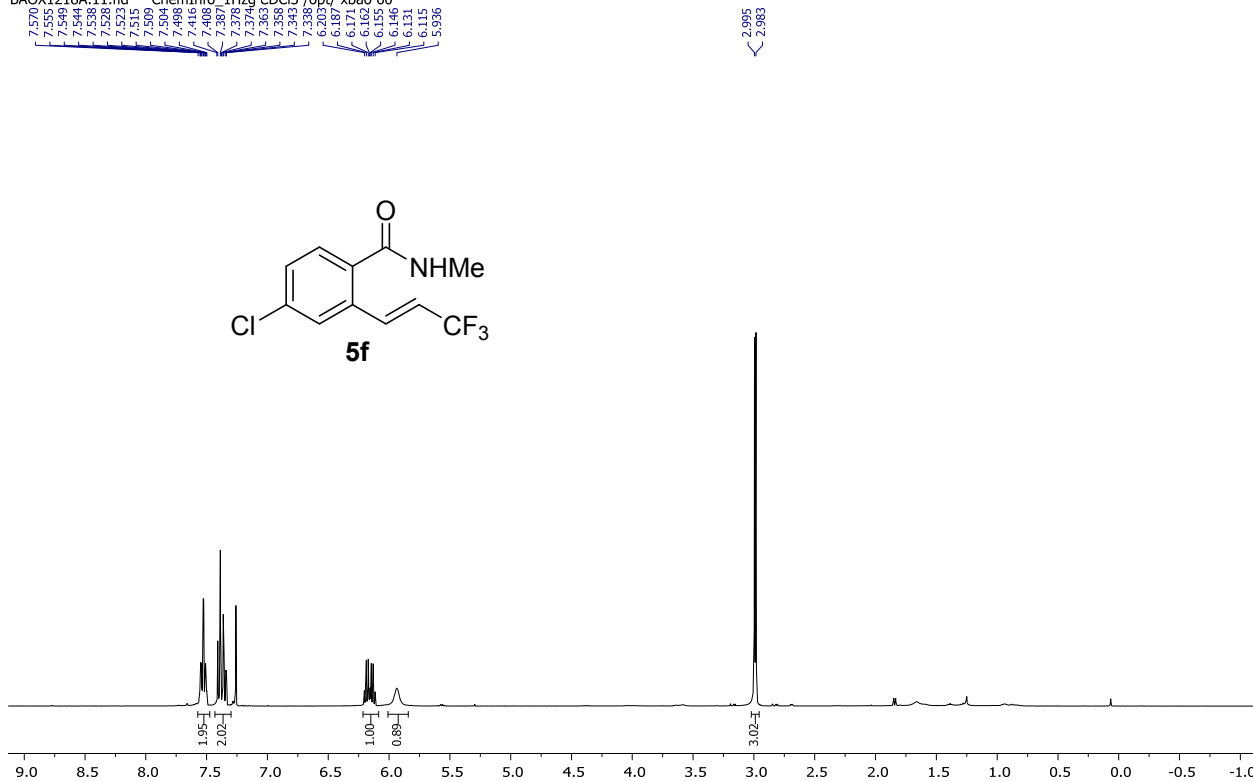

Supplementary Figure 60. <sup>1</sup>H spectra of **5f**

BAOX1218A.12.fid — ChemInfo\_13C\_cpd CDCl3 /opt/ xbao 60

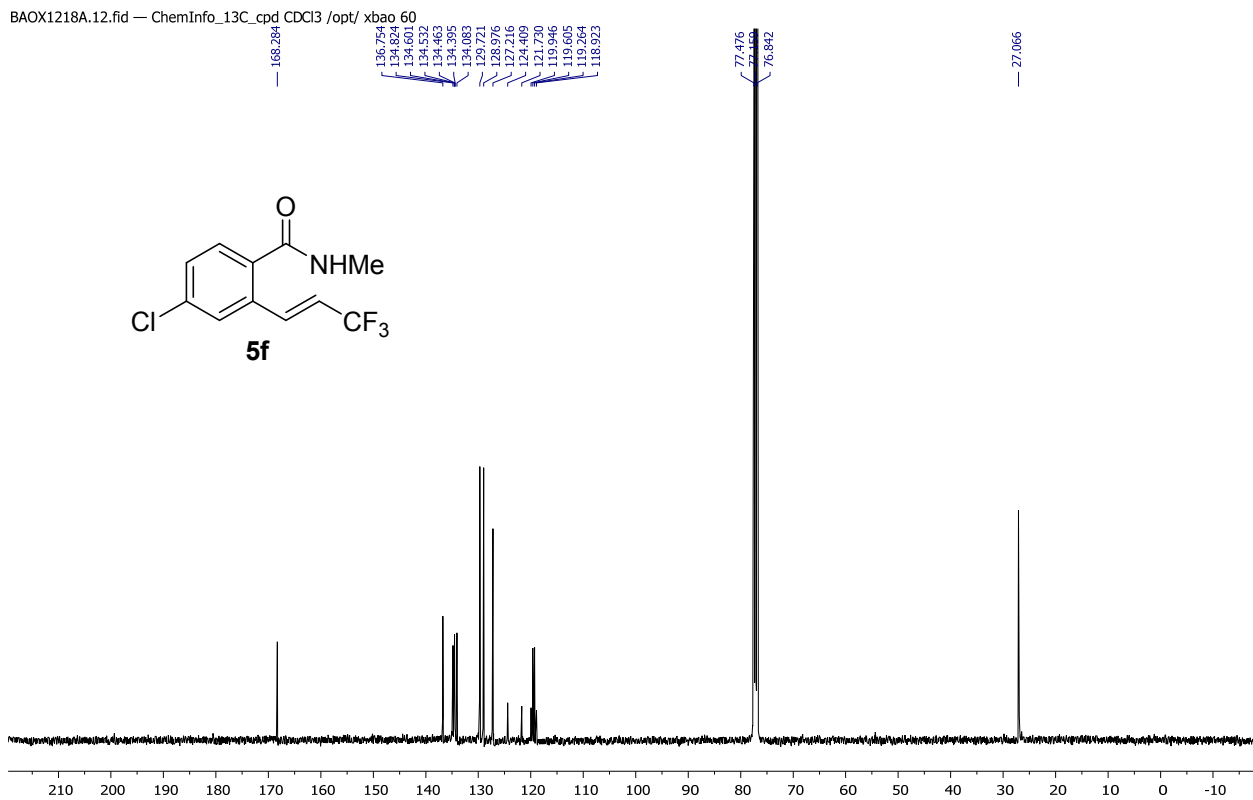

### Supplementary Figure 61. <sup>13</sup>C NMR spectra of 5f

BAOX1218A.14.fid — ChemInfo\_19Fzg CDCl3 /opt/ xbao 60

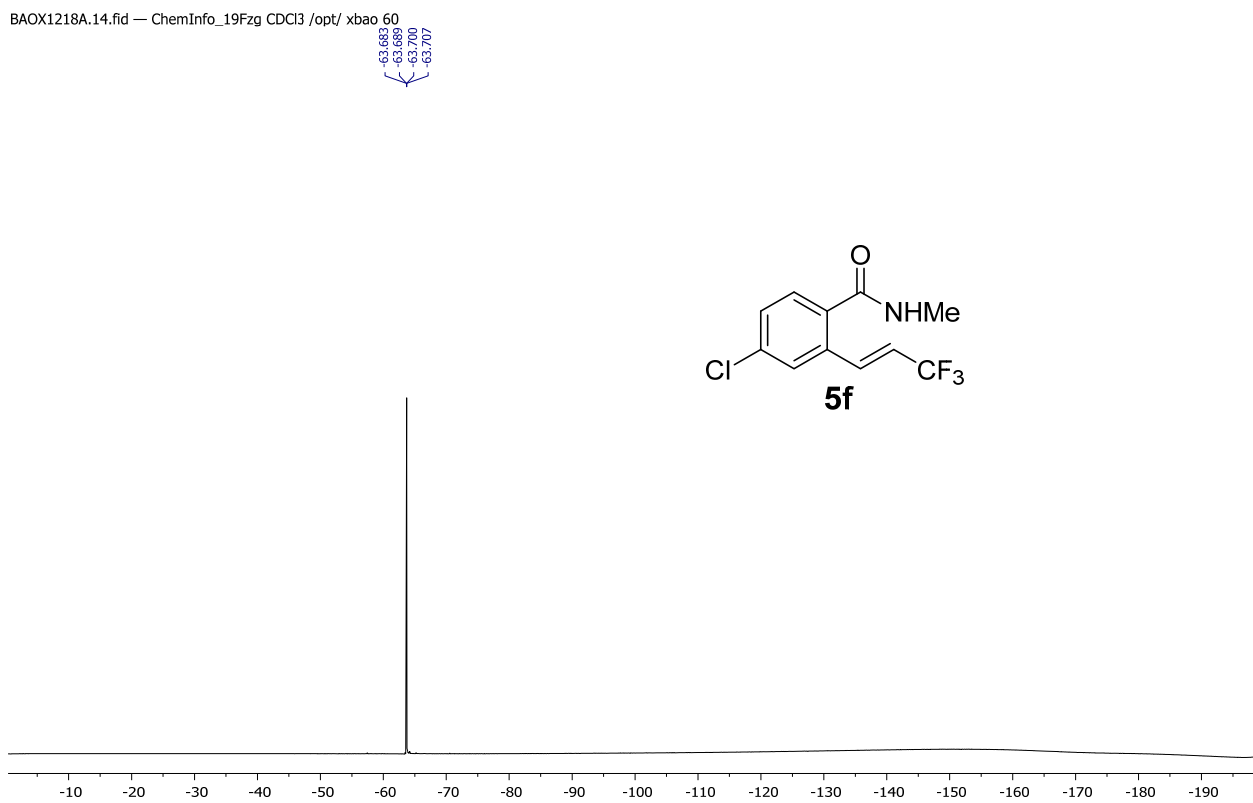

### Supplementary Figure 62. <sup>19</sup>F spectra of 5f



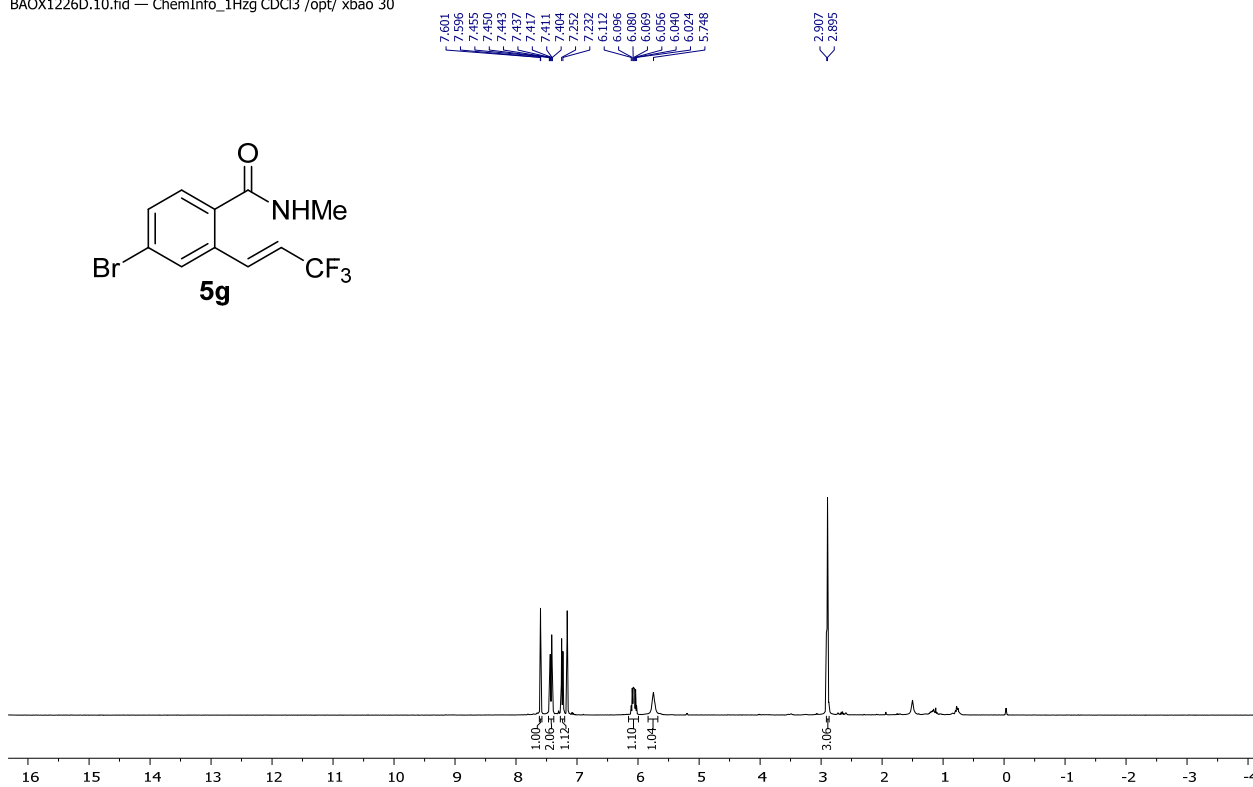

Supplementary Figure 63. <sup>1</sup>H spectra of **5g**

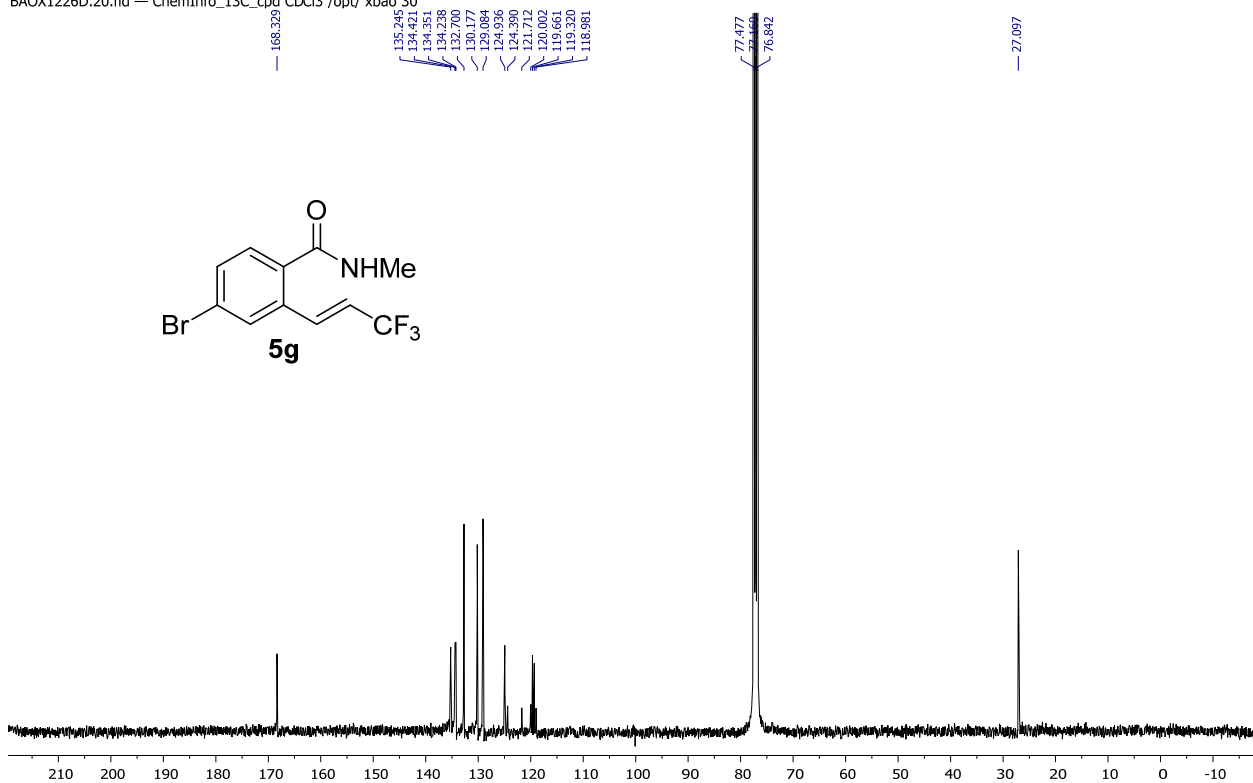

Supplementary Figure 64. <sup>13</sup>C NMR spectra of **5g**

63.680  
63.697

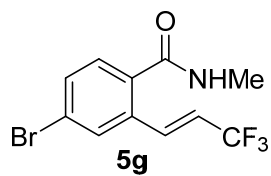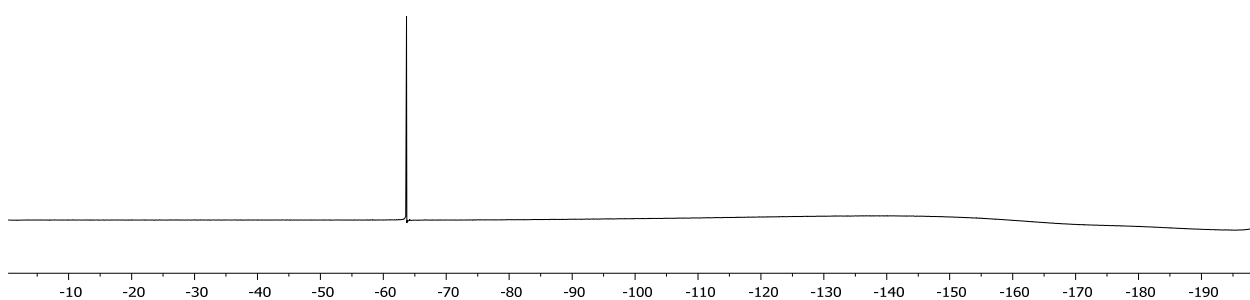

### Supplementary Figure 65. <sup>19</sup>F spectra of 5g

7.843  
7.843  
7.694  
7.694  
7.690  
7.674  
7.670  
7.588  
7.569  
7.536  
7.525  
7.525  
7.495  
7.480  
7.484  
7.479  
6.275  
6.260  
6.244  
6.235  
6.228  
6.219  
7.14  
5.988  
5.988

3.027  
3.015

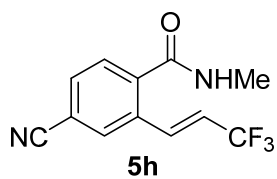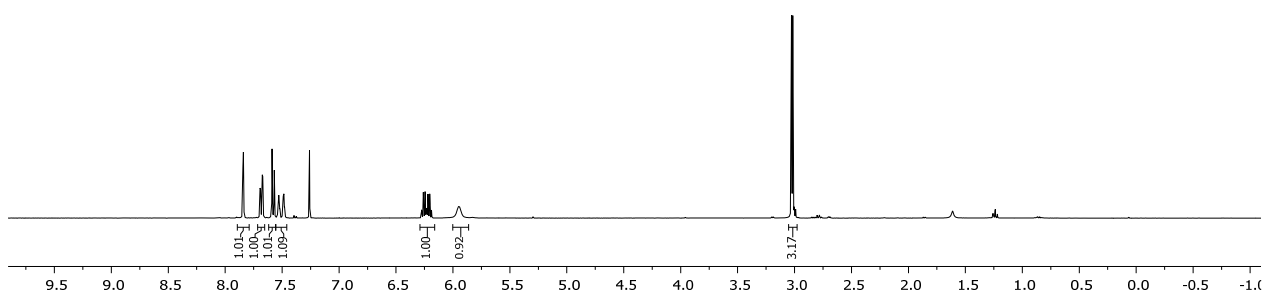

### Supplementary Figure 66. <sup>1</sup>H spectra of 5h

BAOX1248B.2.fid — ChemInfo\_13C\_cpd CDCl3 /opt/ xbao 27

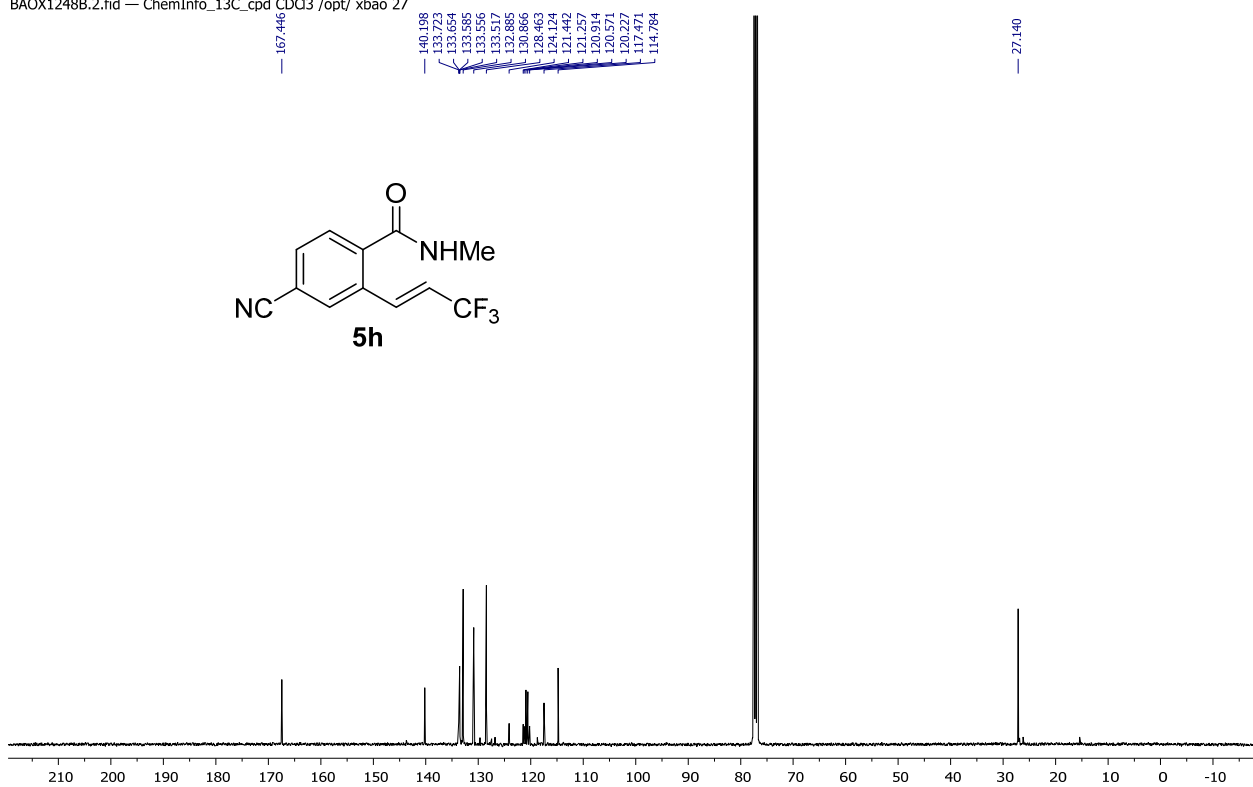

Supplementary Figure 67.  $^{13}\text{C}$  NMR spectra of **5h**

BAOX1248B.4.fid — ChemInfo\_19Fzg CDCl3 /opt/ xbao 27

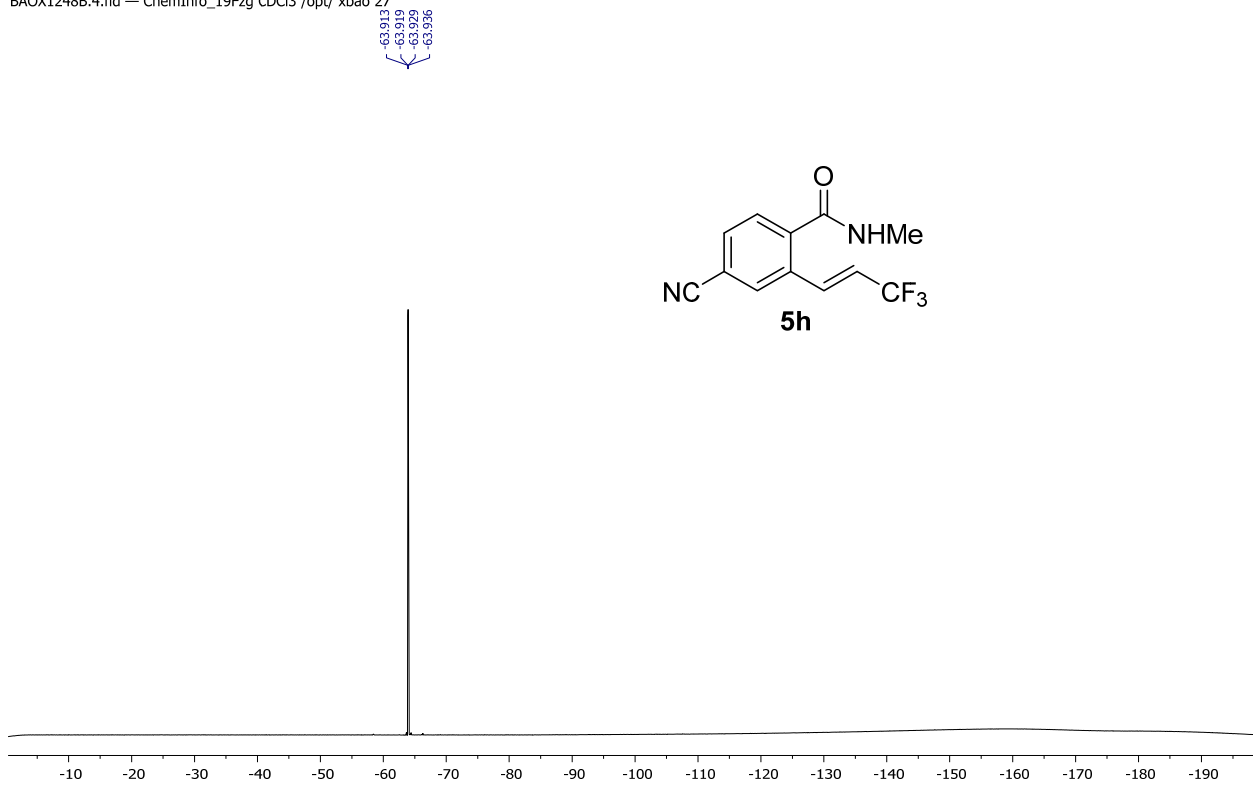

Supplementary Figure 68.  $^{19}\text{F}$  spectra of **5h**

BAOX1240C.1.fid — ChemInfo\_1Hzq CDCl3 /opt/ xbao 57

7.310  
7.298  
7.293  
7.269  
7.264  
7.258  
7.252  
7.222  
7.214  
7.207  
7.193  
5.937  
5.921  
5.905  
5.896  
5.889  
5.880  
5.865  
5.849  
5.608

2.827  
2.865

2.279

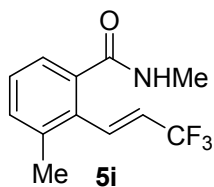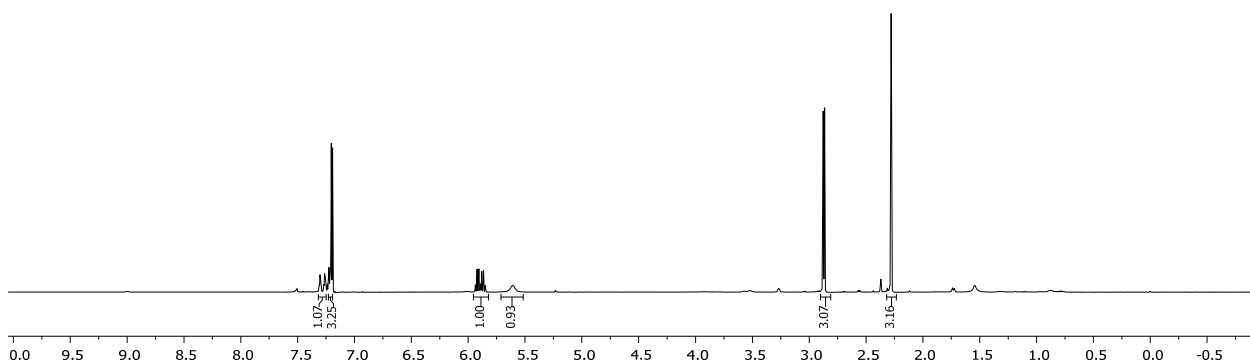

### Supplementary Figure 69. <sup>1</sup>H spectra of 5i

BAOX1240C.2.fid — refe\_13C\_cpd CDCl3 /opt/ xbao 57

170.285  
137.310  
137.046  
134.824  
134.753  
134.684  
134.614  
131.985  
131.044  
128.854  
125.498  
124.324  
124.243  
121.939  
121.652  
121.596  
121.261

77.478  
76.843

26.886  
20.571

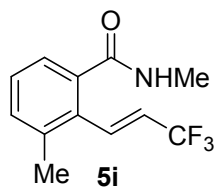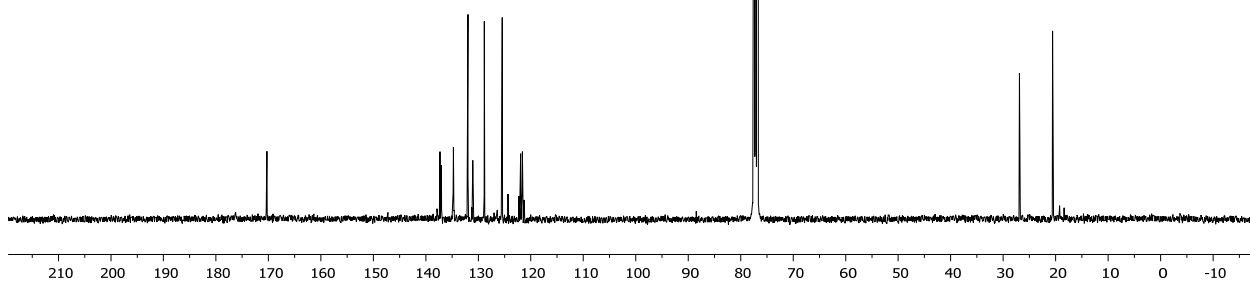

### Supplementary Figure 70. <sup>13</sup>C NMR spectra of 5i

-64.265  
-64.272  
-64.283  
-64.289

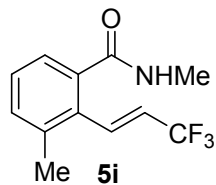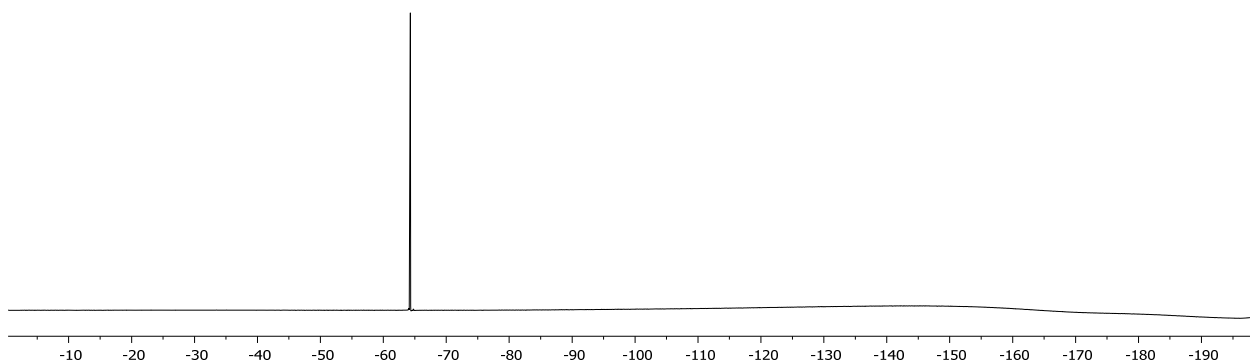

Supplementary Figure 71. <sup>19</sup>F spectra of **5i**

7.241  
7.239  
7.237  
7.235  
7.220  
7.197  
7.191  
7.186  
7.180  
7.170  
6.918  
6.915  
6.899  
6.896  
6.894  
6.883  
6.880  
6.474  
6.457  
6.433  
6.424  
6.416  
6.400  
6.383  
6.102  
6.088  
6.077

3.840

2.866  
2.854

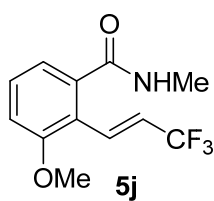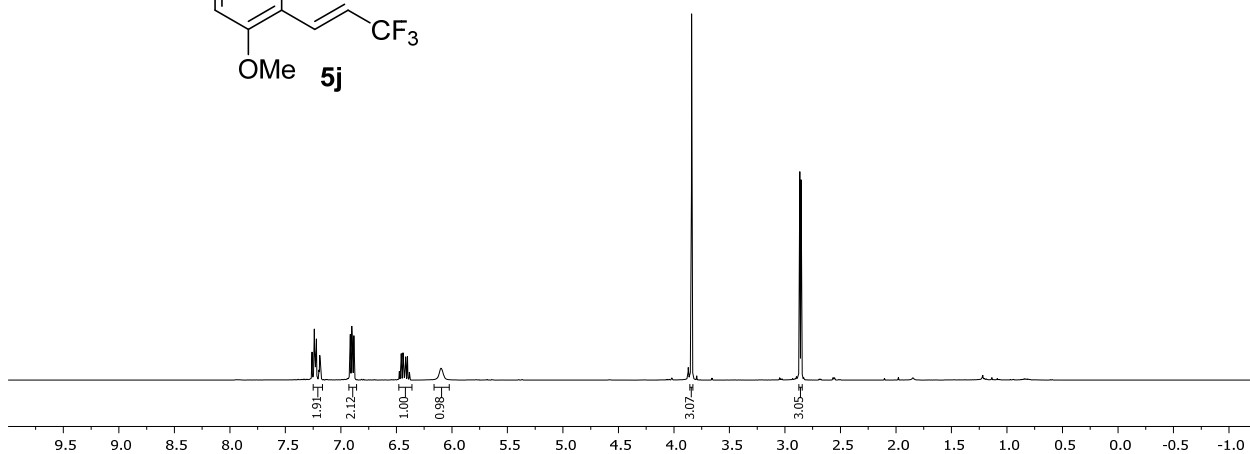

Supplementary Figure 72. <sup>1</sup>H spectra of **5j**

BAOX1240F.20.fid — ChemInfo\_13C\_cpdc DCI3 /opt/ xbao 9

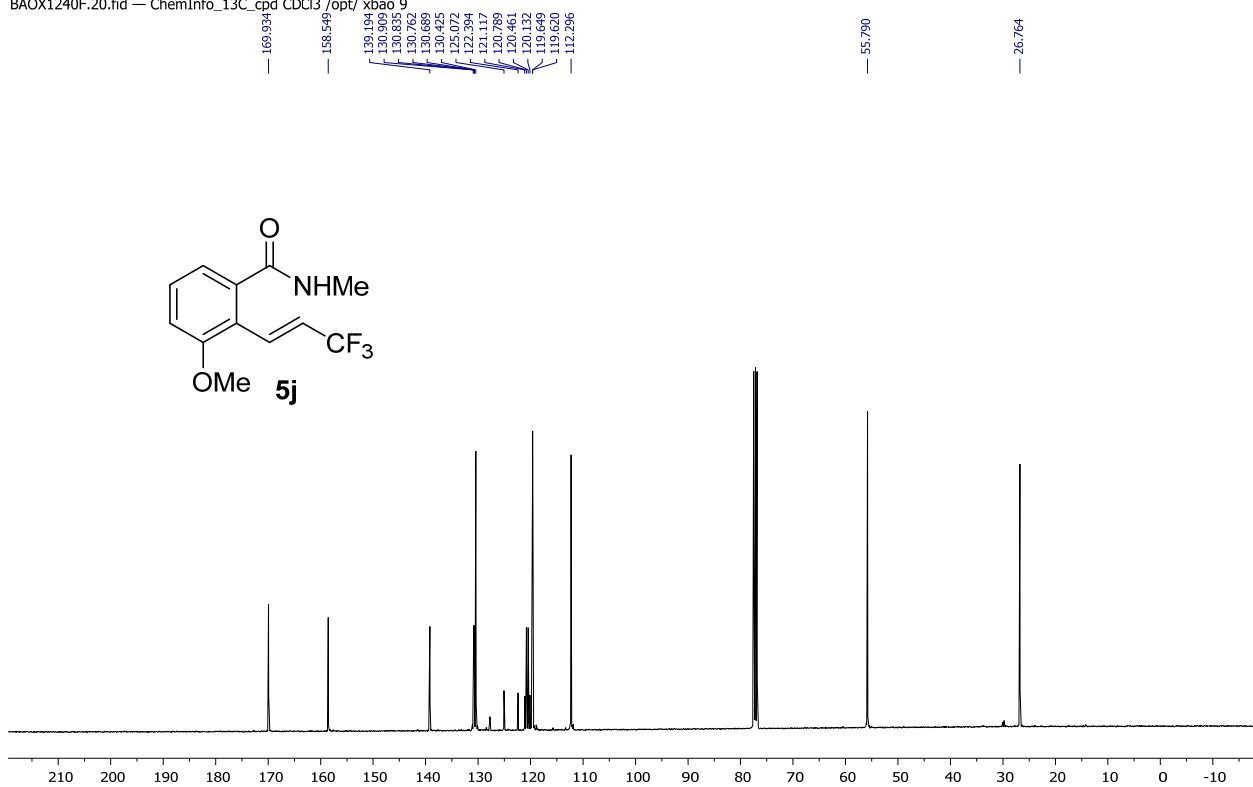

Supplementary Figure 73.  $^{13}\text{C}$  NMR spectra of 5j

BAOX1240F.4.fid — ChemInfo\_19Fzg DCI3 /opt/ xbao 56

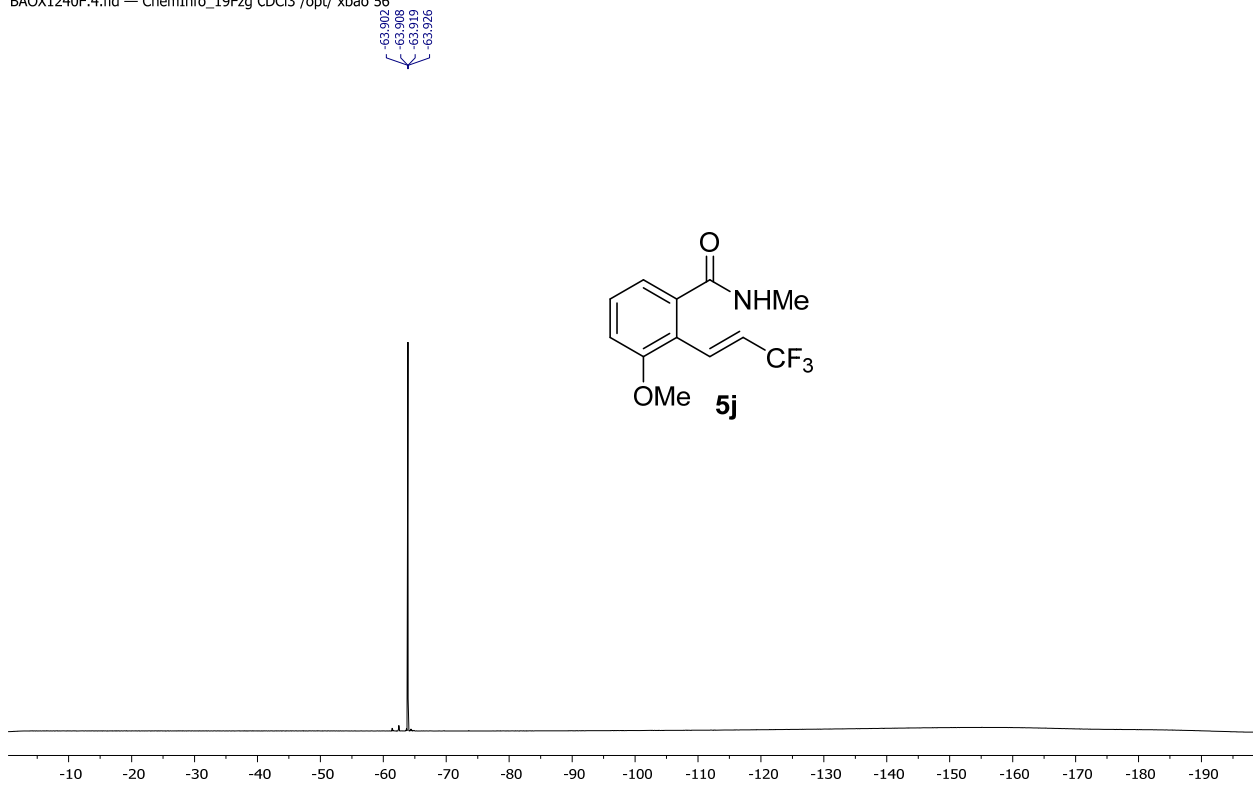

Supplementary Figure 74.  $^{19}\text{F}$  spectra of 5j

BAOX1272A.1.fid — ChemInfo\_1Hzq CDCl3 /opt/ xbao 58

7.366  
7.353  
7.346  
7.333  
7.326  
7.319  
7.312  
7.305  
7.298  
7.291  
7.284  
7.278  
7.272  
7.265  
7.243  
7.237  
7.229  
7.201  
7.186  
7.180  
7.177  
7.173  
7.152  
7.149  
6.469  
6.453  
6.437  
6.427  
6.412  
6.396  
6.380  
5.958

2.986  
2.974

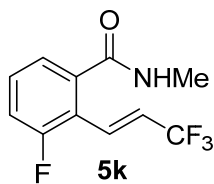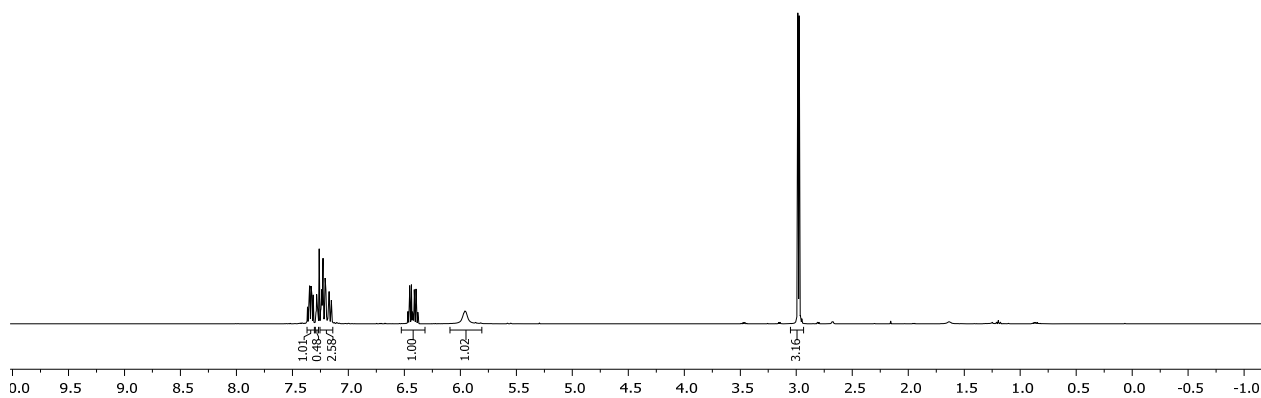

### Supplementary Figure 75. <sup>1</sup>H spectra of 5k

BAOX1272A.2.fid — refe\_13C\_cpd CDCl3 /opt/ xbao 58

168.455  
168.422  
162.615  
160.085

139.176  
130.911  
130.816  
128.502  
128.530  
128.677  
128.664  
127.564  
124.574  
123.380  
123.344  
123.118  
122.782  
122.584  
122.649  
122.447  
121.114  
121.112  
121.978  
118.096  
117.864

27.012

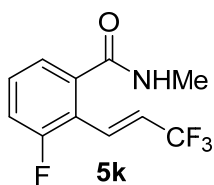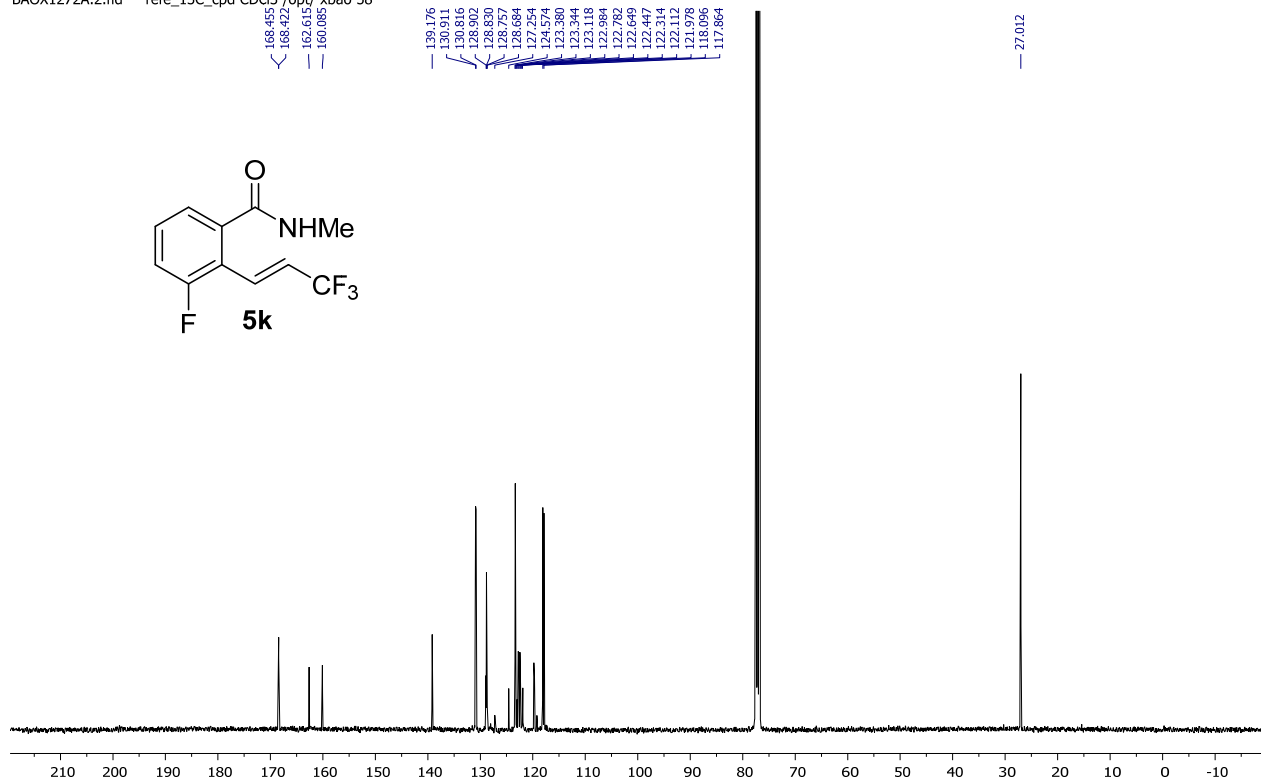

### Supplementary Figure 76. <sup>13</sup>C NMR spectra of 5k

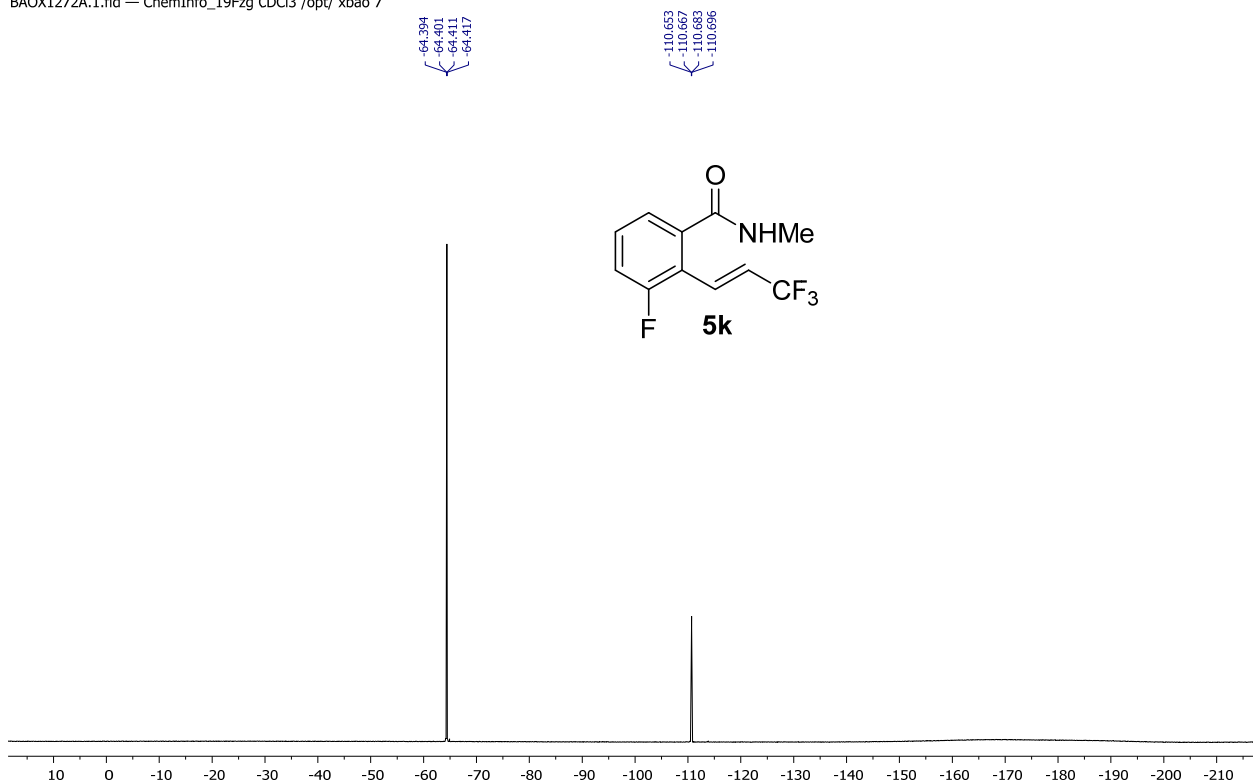

Supplementary Figure 77. <sup>19</sup>F spectra of 5k

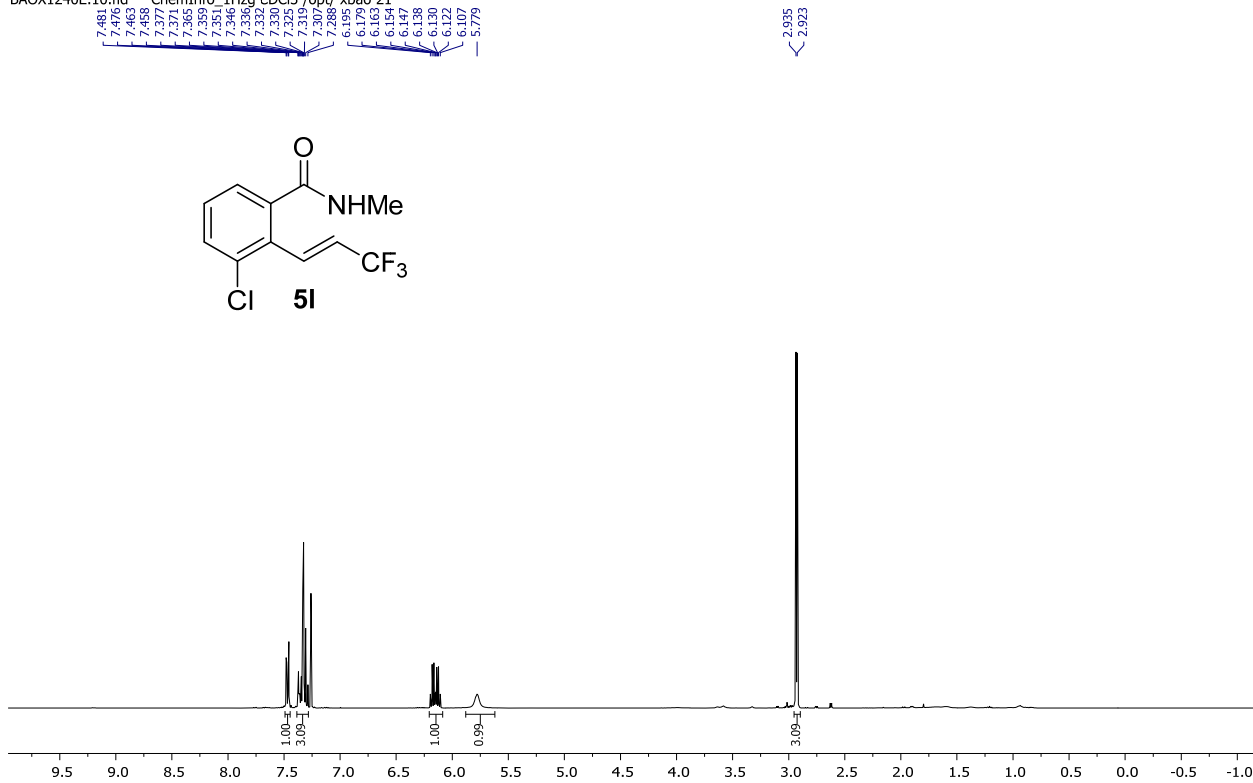

Supplementary Figure 78. <sup>1</sup>H spectra of 5l



BAOX1240E.11.fid — ChemInfo\_13C\_cpd CDCl3 /opt/ xbao 21

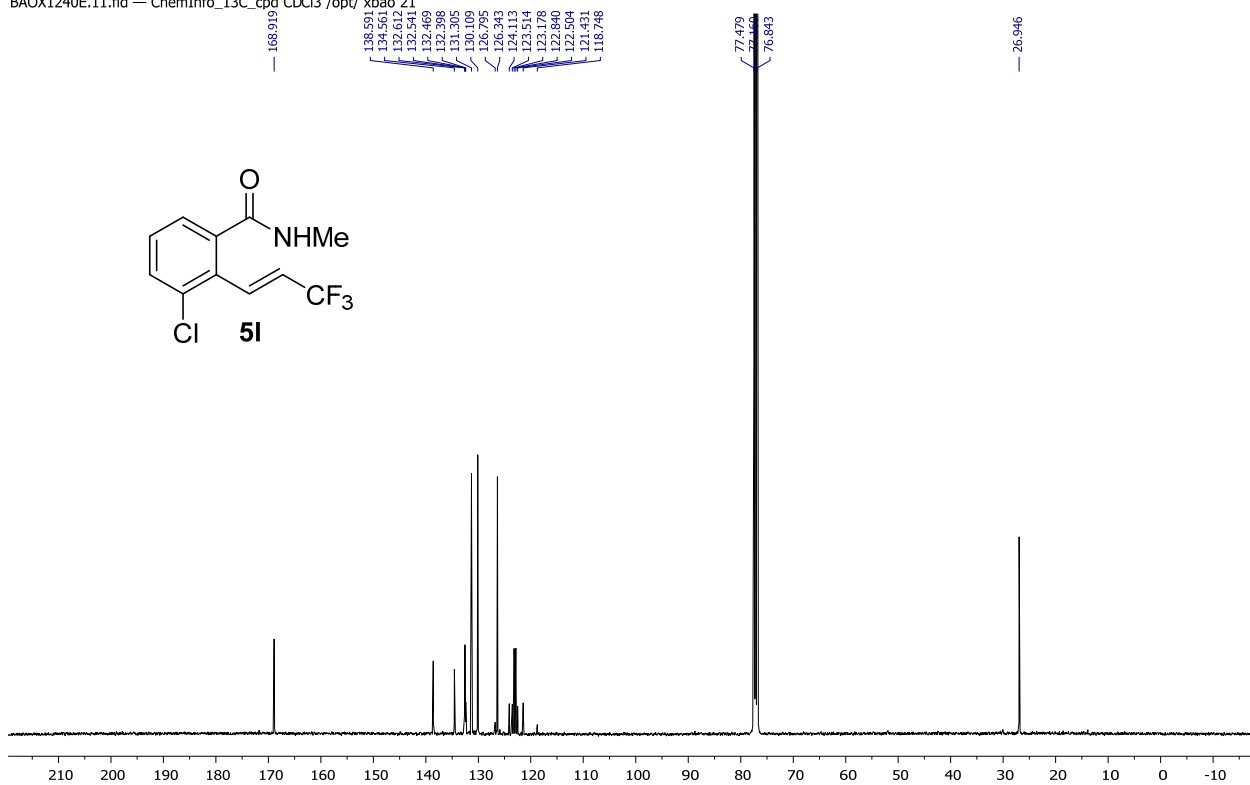

Supplementary Figure 79. <sup>13</sup>C NMR spectra of 51

BAOX1240E.4.fid — ChemInfo\_19Fzg CDCl3 /opt/ xbao 57

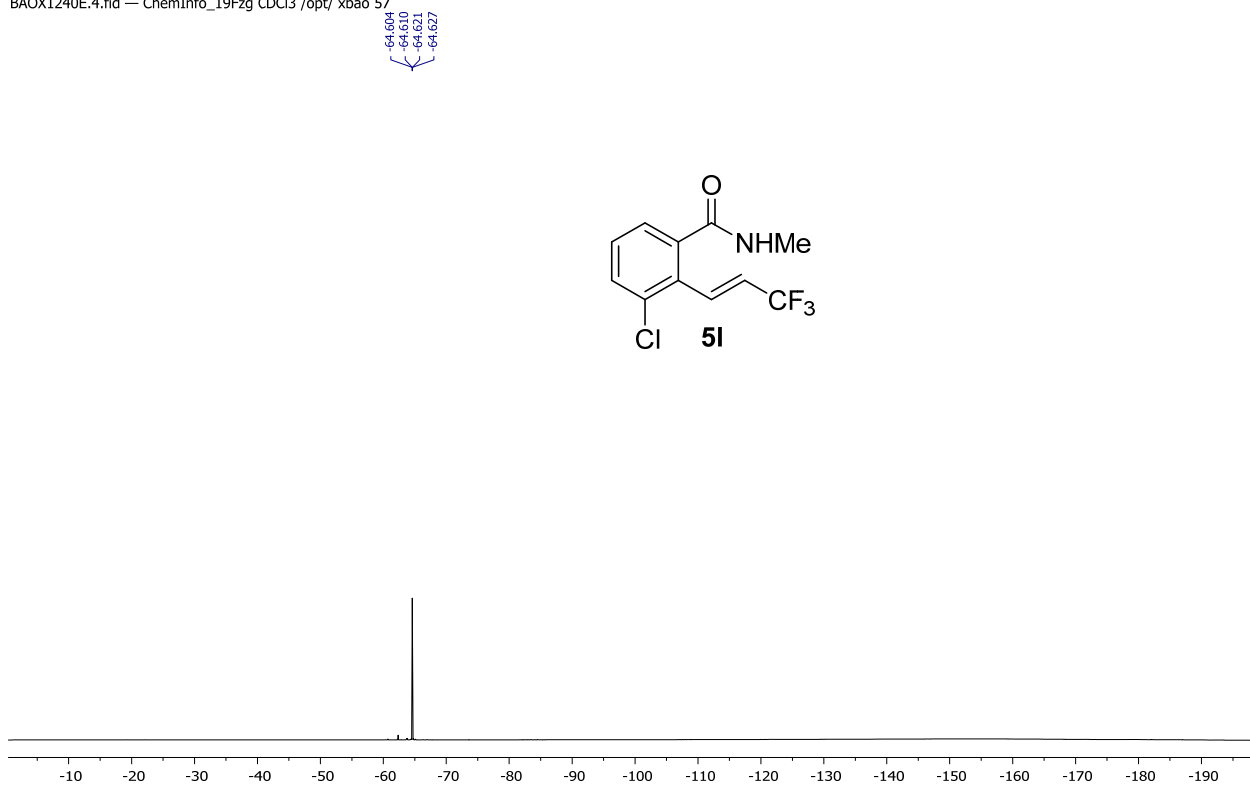

Supplementary Figure 80. <sup>19</sup>F spectra of 51

BAOX1240D.1.fid — ChemInfo\_1Hzq CDCl3 /opt/ xbao 55

7.689  
7.688  
7.660  
7.658  
7.414  
7.395  
7.360  
7.355  
7.349  
7.330  
7.314  
7.302  
7.260  
7.242  
7.223  
6.140  
6.124  
6.108  
6.092  
6.083  
6.067  
6.052  
5.660

2.942  
2.930

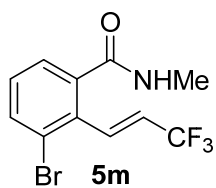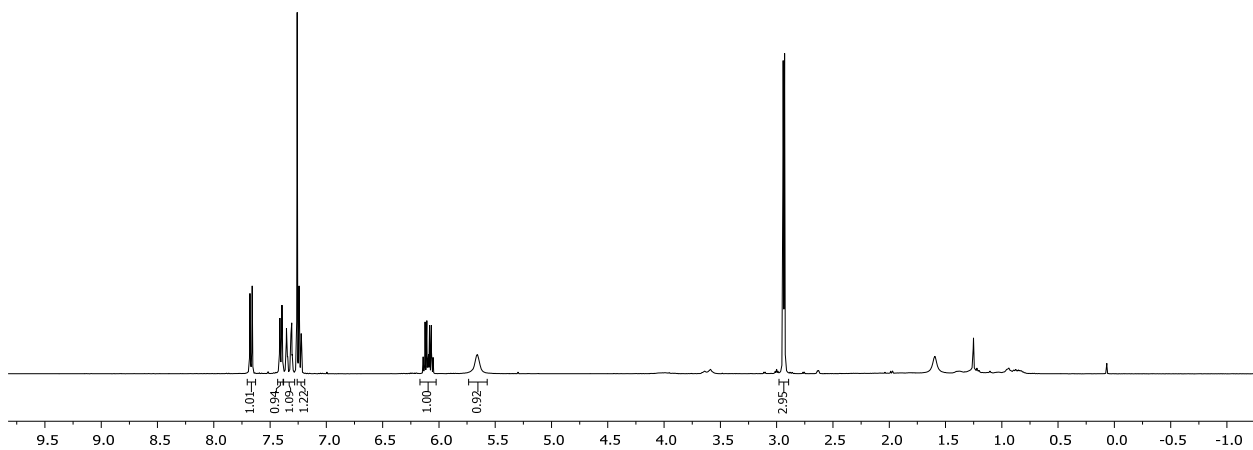

### Supplementary Figure 81. <sup>1</sup>H spectra of 5m

BAOX1240D.2.fid — ChemInfo\_13C\_cpd CDCl3 /opt/ xbao 55

168.909  
138.589  
134.903  
134.832  
134.762  
134.690  
131.946  
130.290  
129.411  
124.517  
124.027  
123.380  
123.042  
122.704  
122.368  
121.348  
77.478  
76.843  
26.981

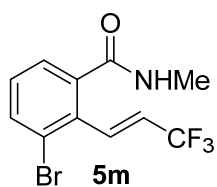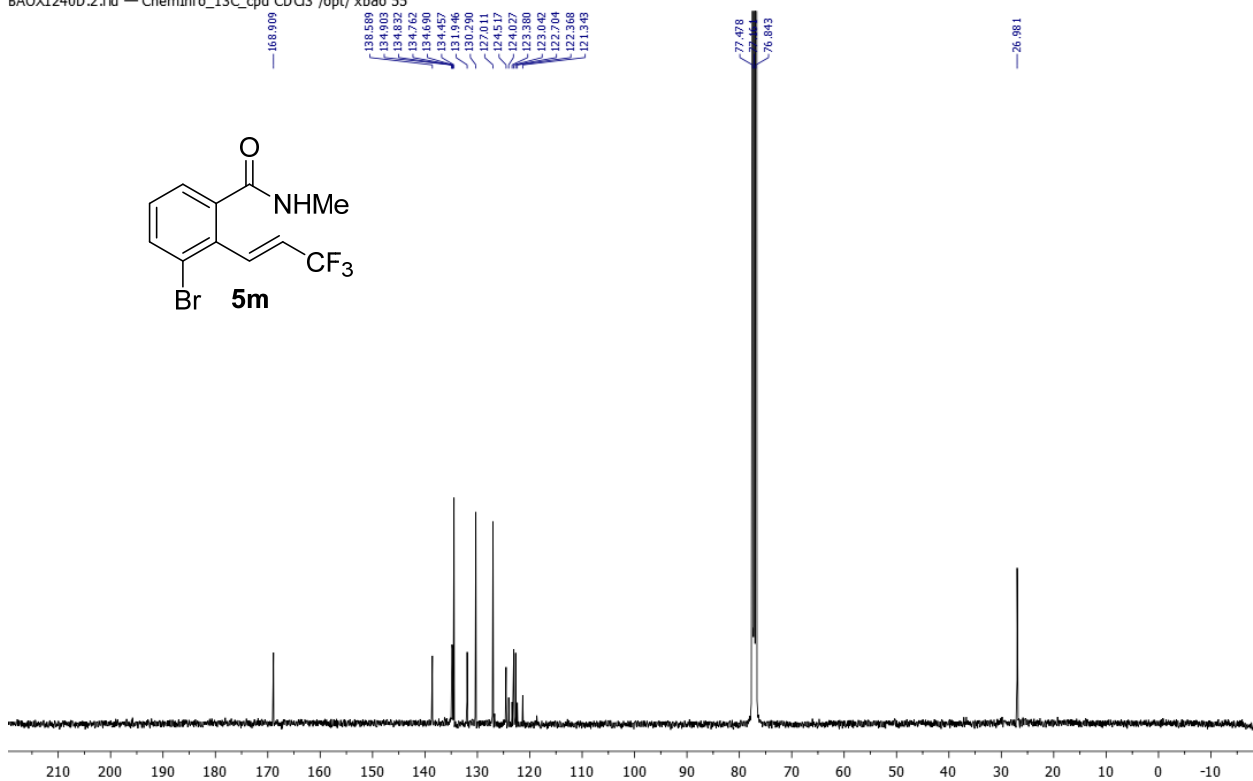

### Supplementary Figure 82. <sup>13</sup>C NMR spectra of 5m

-64.636  
-64.653  
-64.660

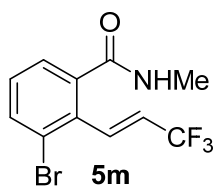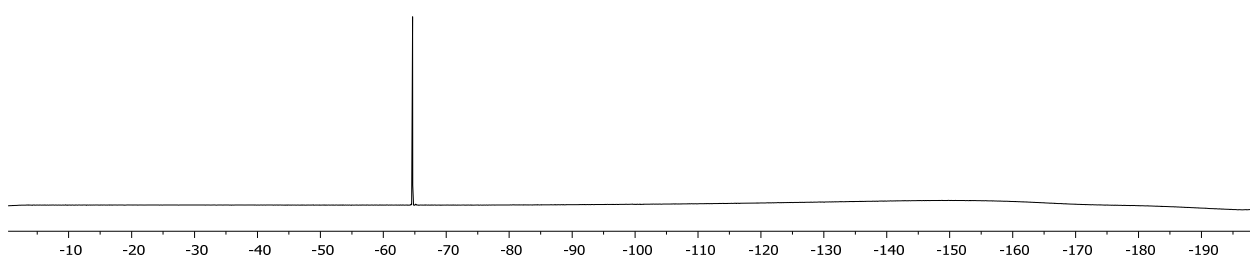

### Supplementary Figure 83. <sup>19</sup>F spectra of 5m

7.580  
7.555  
7.549  
7.520  
7.514  
7.509  
7.476  
7.456  
7.285  
7.267  
7.248  
7.244  
6.171  
6.139  
6.135  
6.115  
6.099  
6.082  
5.777

3.015  
3.003

2.379

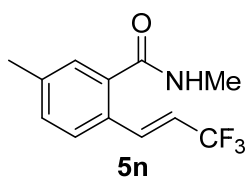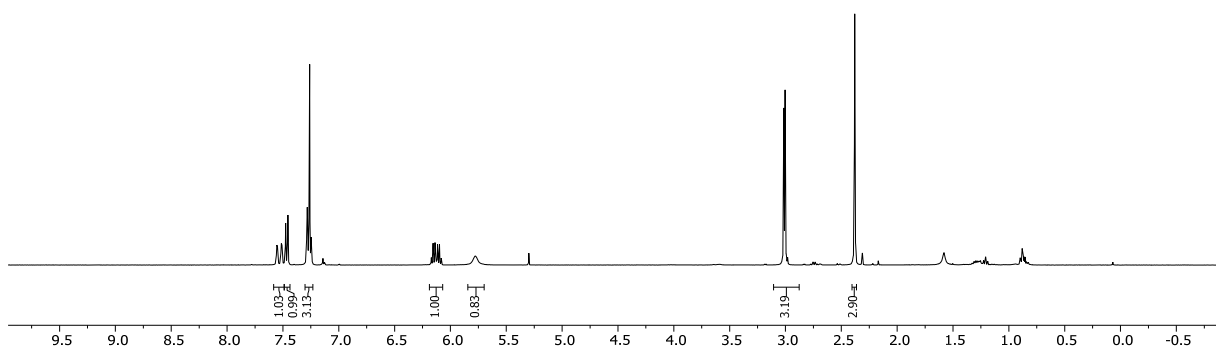

### Supplementary Figure 84. <sup>1</sup>H spectra of 5n

BAOX1240A.20.fid — ChemInfo\_13C\_cpdc DCI3 /opt/ xbao 8

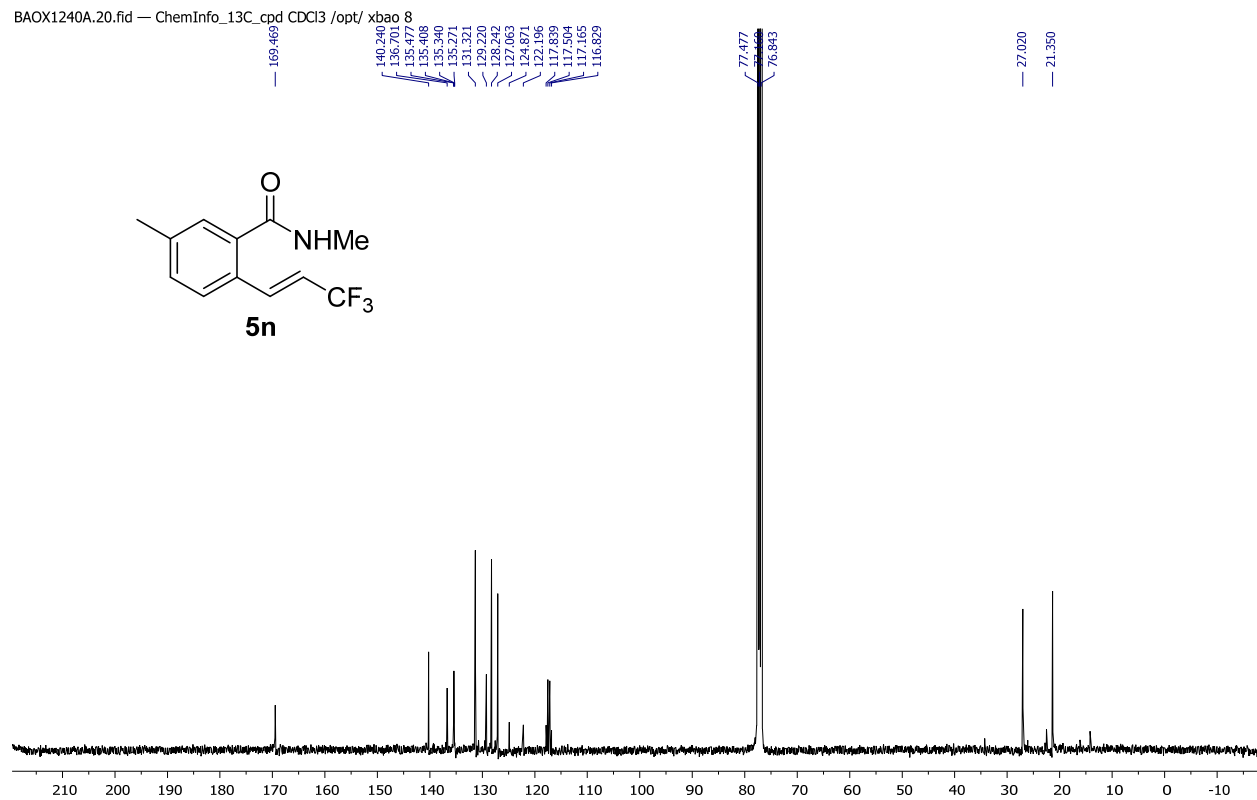

Supplementary Figure 85.  $^{13}\text{C}$  NMR spectra of 5n

BAOX1240A.4.fid — ChemInfo\_19Fzg DCI3 /opt/ xbao 55

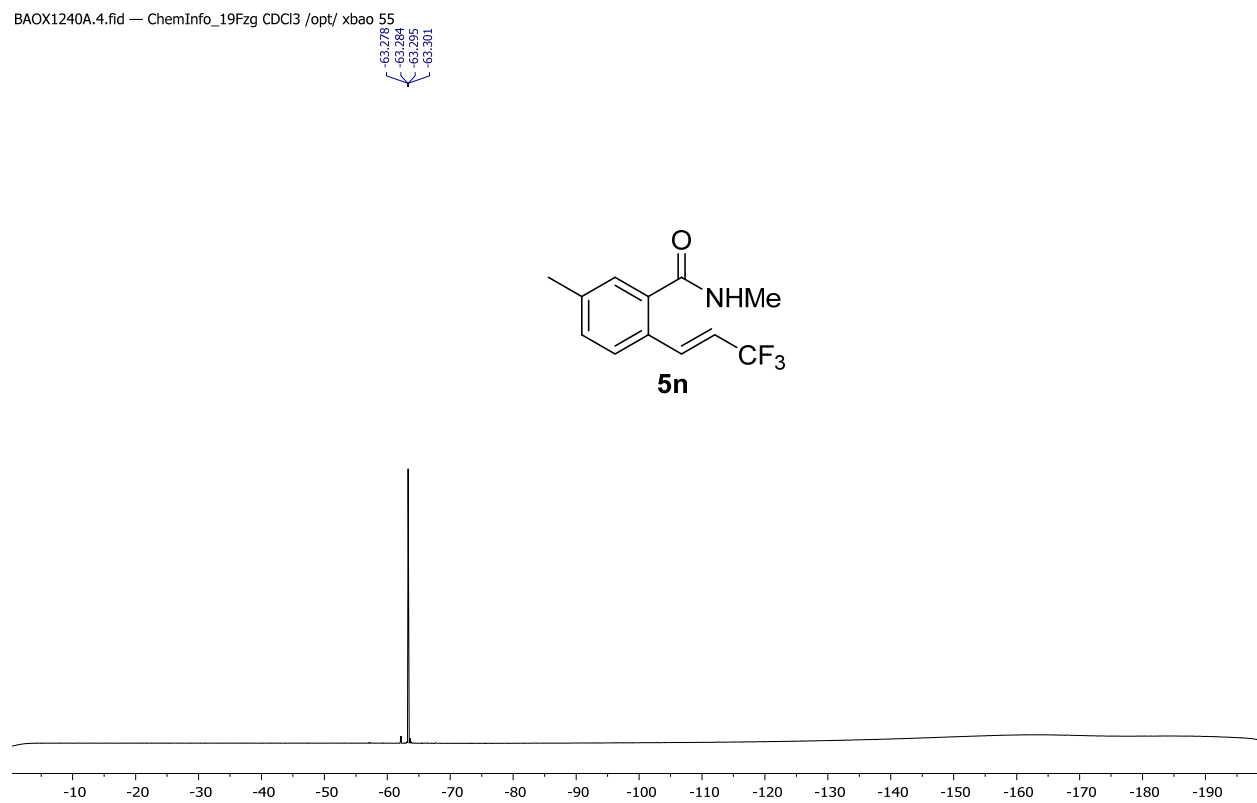

Supplementary Figure 86.  $^{19}\text{F}$  spectra of 5n

BAOX1255C.1.fid — ChemInfo\_1Hzq CDCl3 /opt/ xbao 21

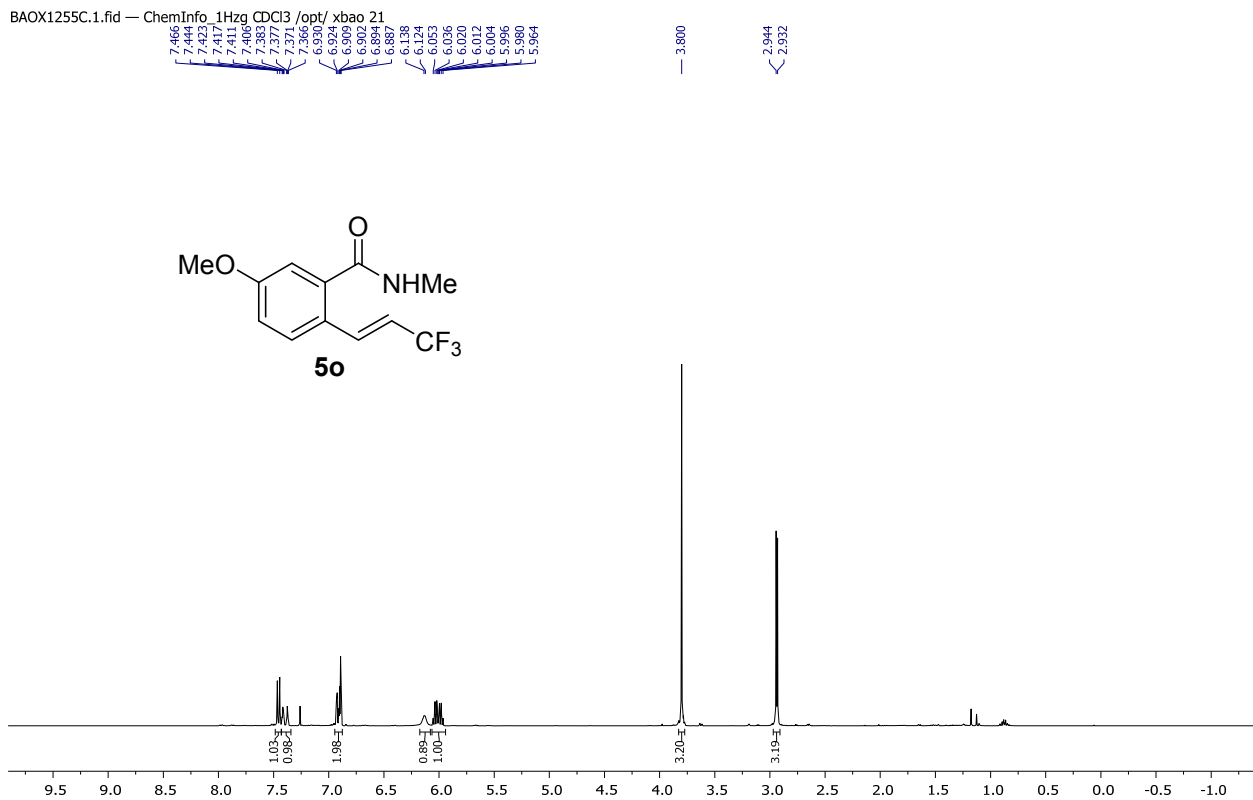

Supplementary Figure 87. <sup>1</sup>H spectra of 5o

BAOX1255C.2.fid — ChemInfo\_13C\_cpd CDCl3 /opt/ xbao 21

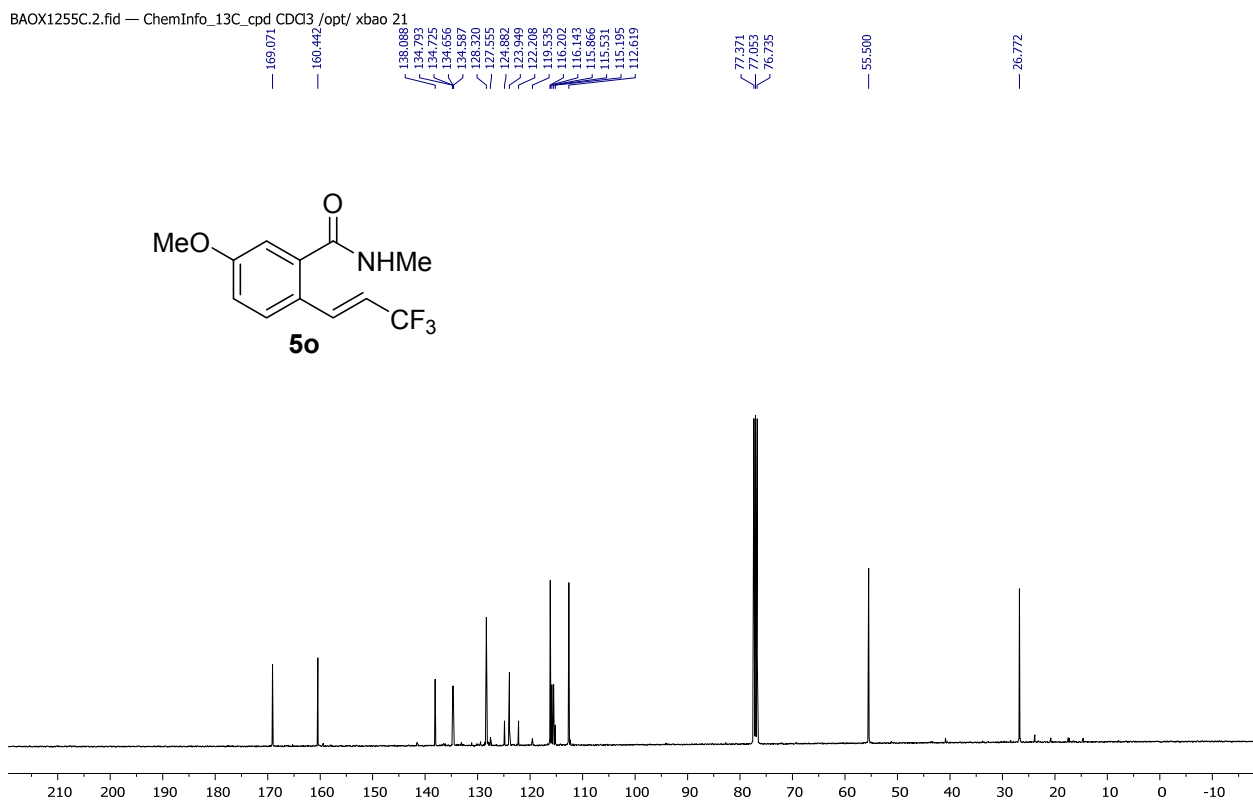

Supplementary Figure 88. <sup>13</sup>C NMR spectra of 5o

63.028  
63.045

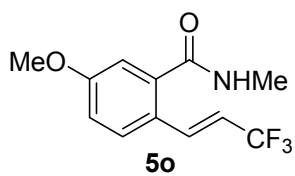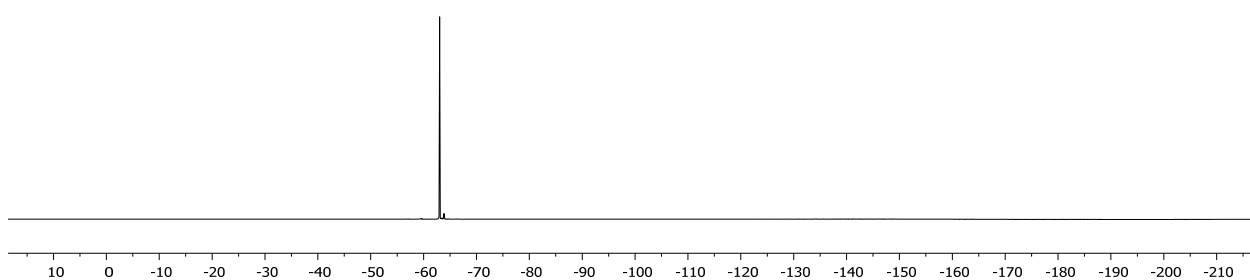

**Supplementary Figure 89. <sup>19</sup>F spectra of 5o**

7.523  
7.517  
7.512  
7.507  
7.497  
7.477  
7.466  
7.439  
7.434  
7.425  
7.423  
7.419  
7.418  
7.404  
7.402  
7.396  
7.389  
7.184  
6.168  
6.152  
6.144  
6.136  
6.128  
6.112  
6.096  
5.971  
5.959

3.001  
2.989

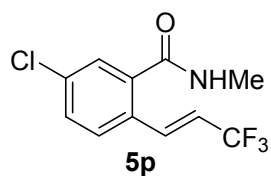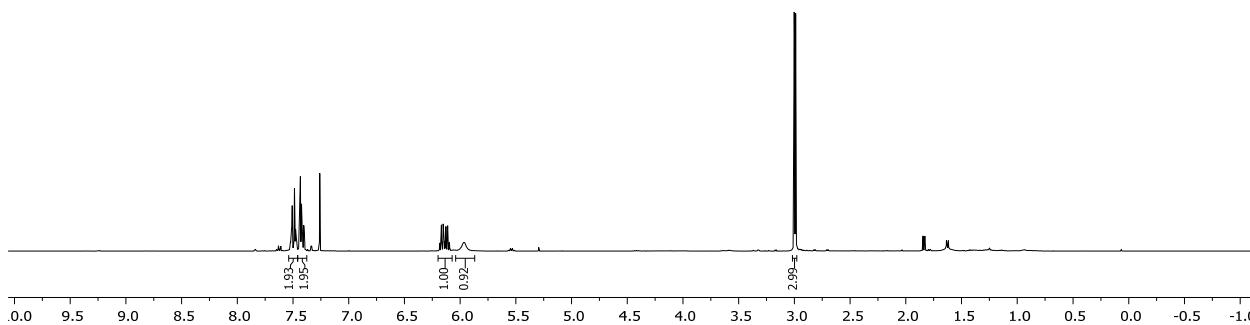

**Supplementary Figure 90. <sup>1</sup>H spectra of 5p**

BAOX1240B.2.fid — ChemInfo\_13C\_cpd CDCl3 /opt/ xbao 56

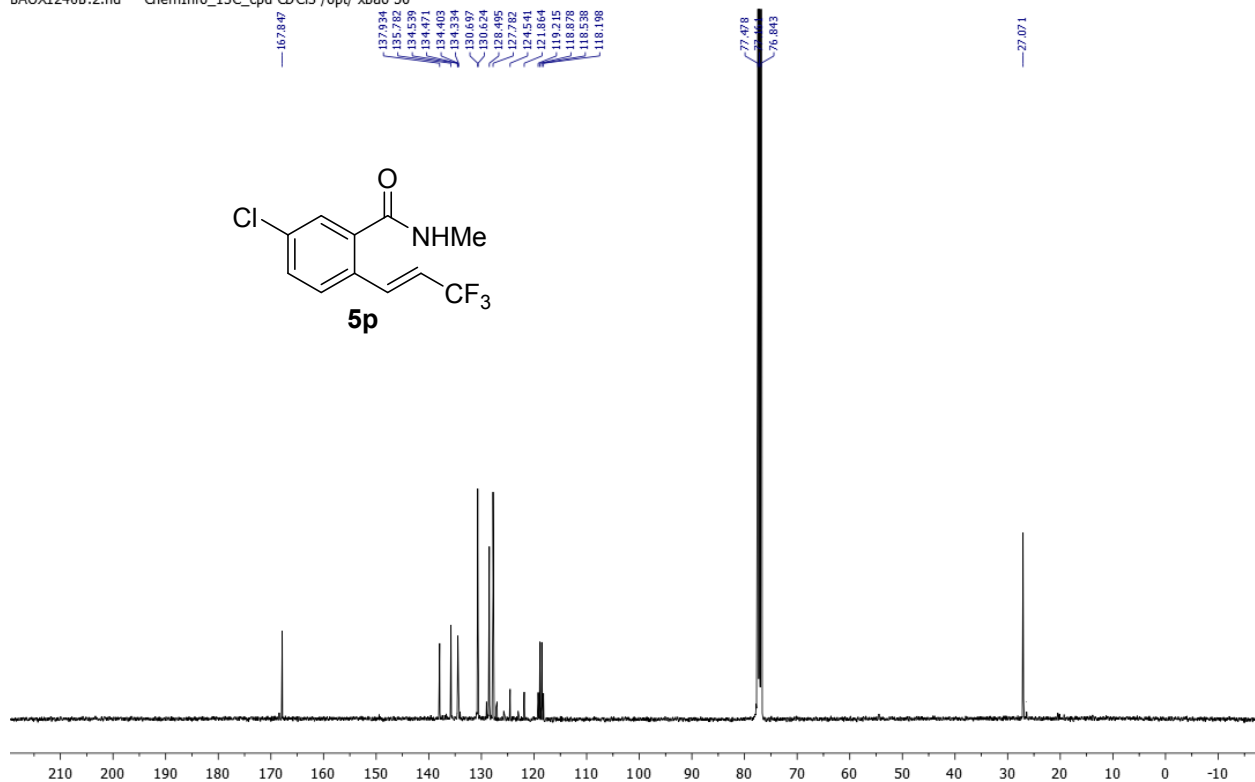

Supplementary Figure 91. <sup>13</sup>C NMR spectra of 5p

BAOX1240B.4.fid — ChemInfo\_19Fzg CDCl3 /opt/ xbao 56

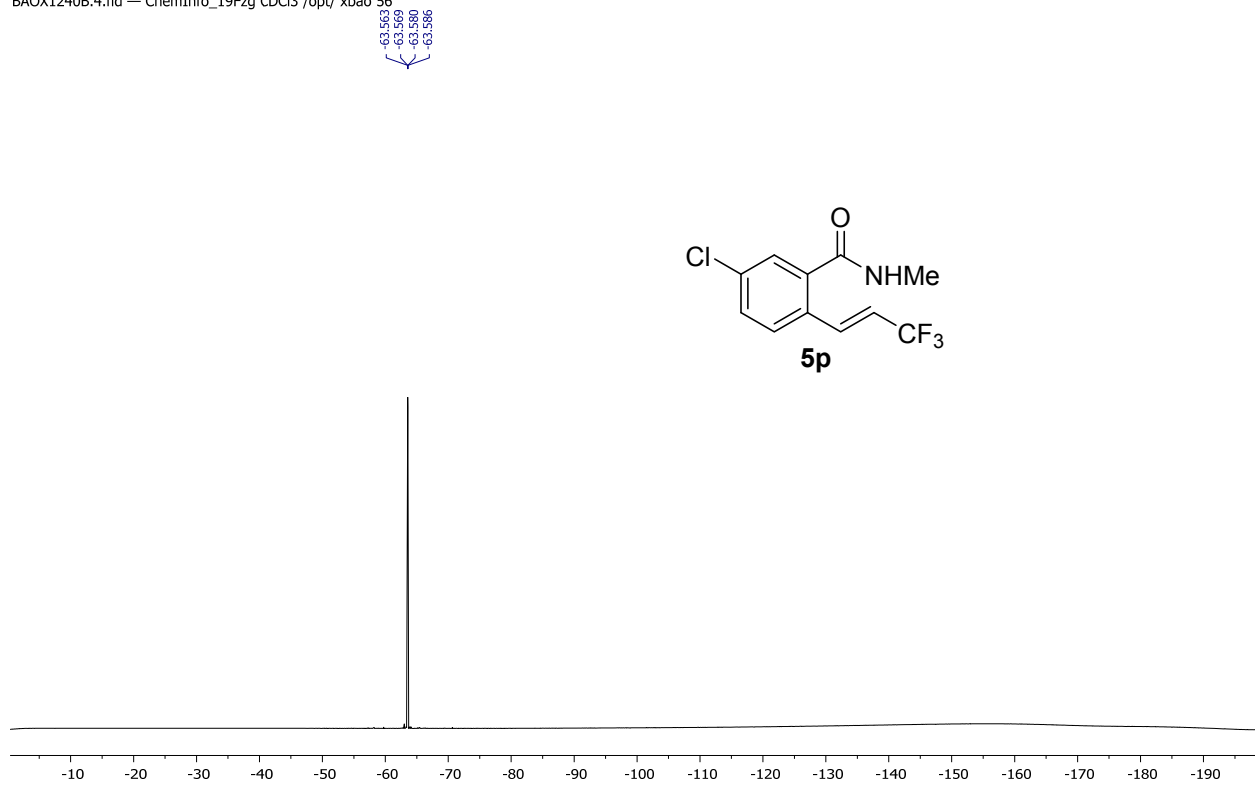

Supplementary Figure 92. <sup>19</sup>F spectra of 5p

BAOX1227A.1.fid — ChemInfo\_1H2g\_CDCl3 /opt/ xbao 16

7.588  
7.588  
7.577  
7.577  
7.570  
7.570  
7.565  
7.565  
7.555  
7.551  
7.501  
7.495  
7.485  
7.485  
7.478  
7.478  
6.193  
6.176  
6.160  
6.132  
6.132  
6.136  
6.136  
6.120  
6.104  
5.994

2.996  
2.984

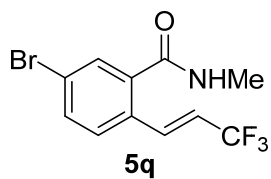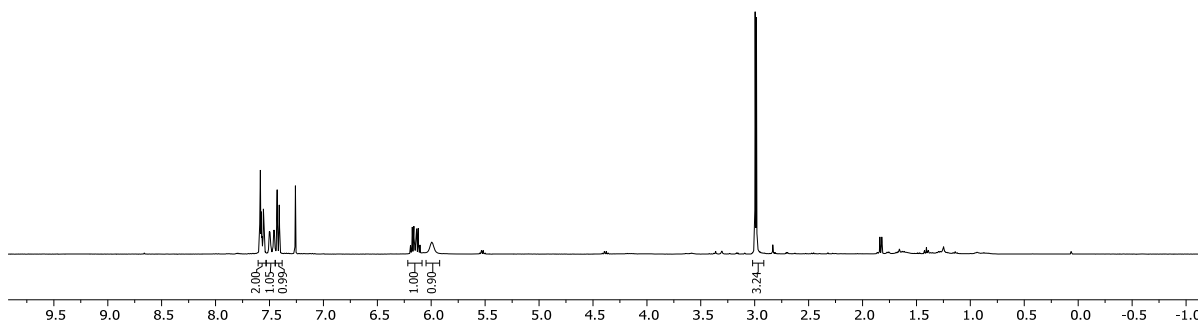

Supplementary Figure 93. <sup>1</sup>H spectra of 5q

BAOX1227A.2.fid — ChemInfo\_13C\_cpd\_CDCl3 /opt/ xbao 16

1677.06  
138.009  
138.039  
134.520  
134.520  
134.501  
134.433  
133.724  
133.644  
133.076  
130.672  
128.624  
124.535  
123.864  
123.867  
118.246  
118.905  
118.567  
118.228

77.478  
76.843

27.075

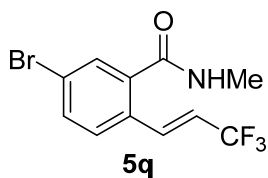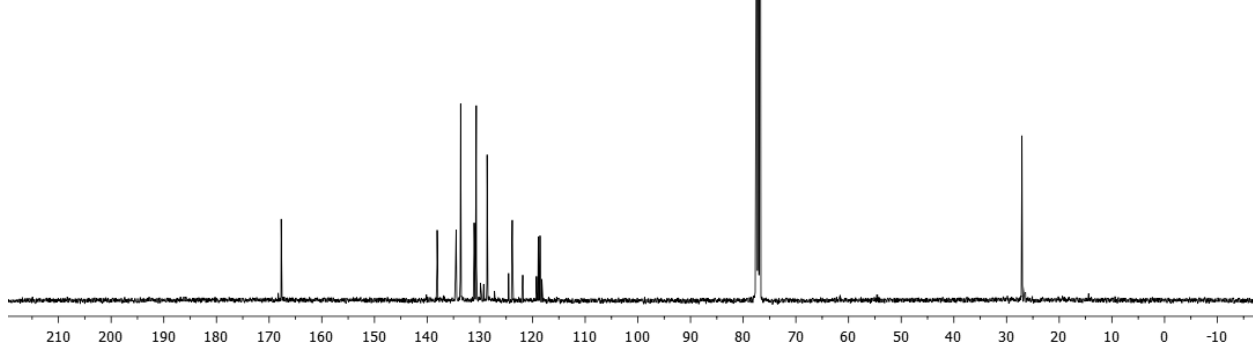

Supplementary Figure 94. <sup>13</sup>C NMR spectra of 5q



BAOX1227A.4.fid — ChemInfo\_19Fzg CDCl3 /opt/ xbao 16

63.586  
63.593  
63.603

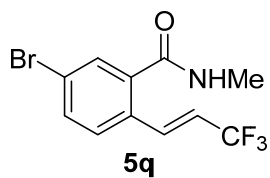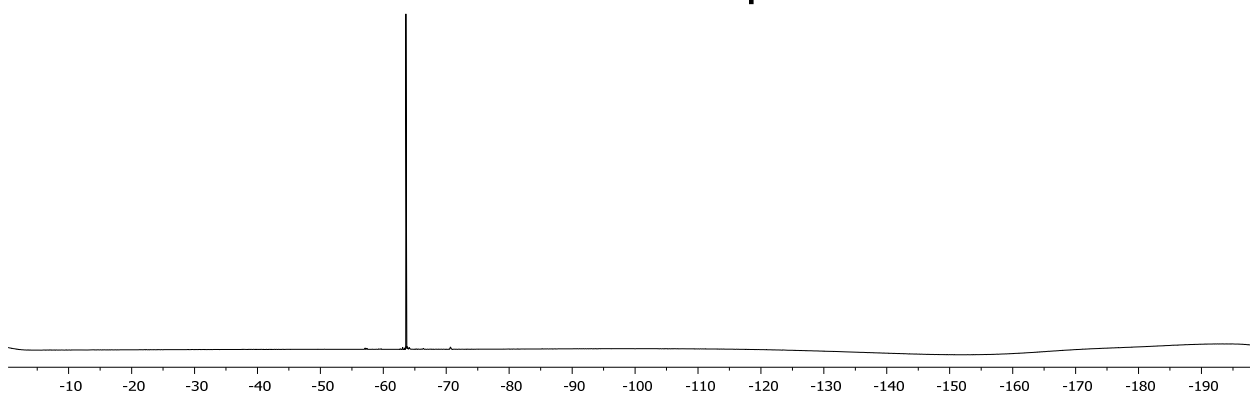

Supplementary Figure 95. <sup>19</sup>F spectra of 5q

BAOX1248C.1.fid — ChemInfo\_1Hzg CDCl3 /opt/topspin xbao 40

7.971  
7.920  
7.863  
7.857  
7.846  
7.840  
7.836  
7.831  
7.820  
7.807  
7.802  
7.7708  
7.702  
7.668  
7.662  
7.590  
7.576  
7.570  
7.563  
7.556  
7.551  
7.549  
7.545  
7.543  
6.746  
6.738  
6.729  
6.722  
6.706  
6.190  
6.082  
6.069

3.057  
3.045

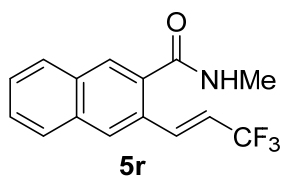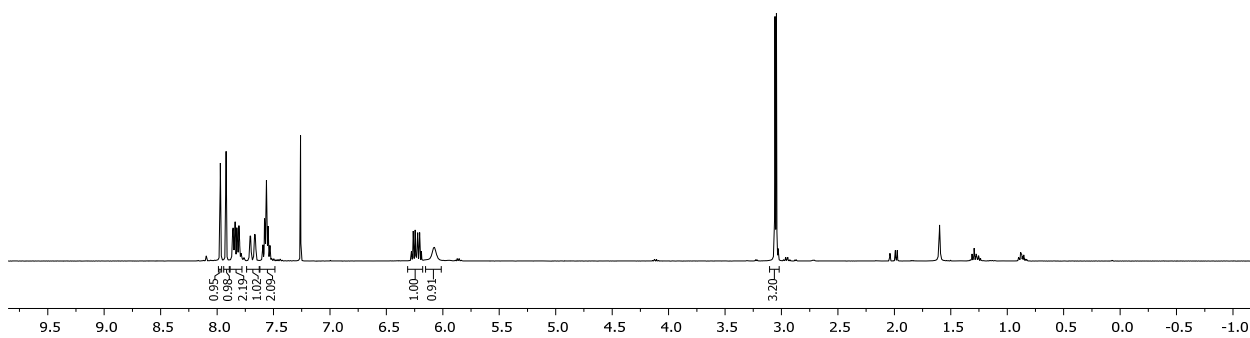

Supplementary Figure 96. <sup>1</sup>H spectra of 5r

BAOX1248C.2.fid — ChemInfo\_13C\_cpd CDCl3 /opt/topspin xbao 40

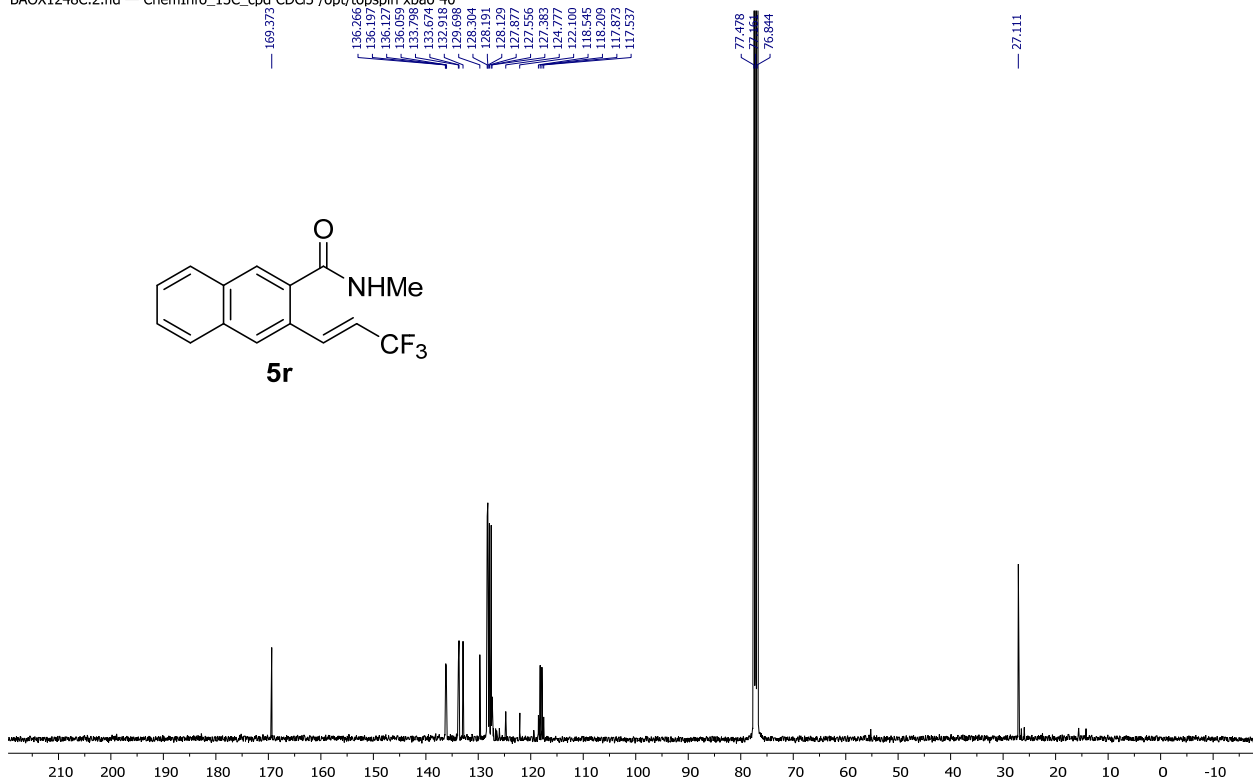

### Supplementary Figure 97. <sup>13</sup>C NMR spectra of 5r

BAOX1248C.2.fid — refe\_19Fzg CDCl3 /opt/ xbao 31

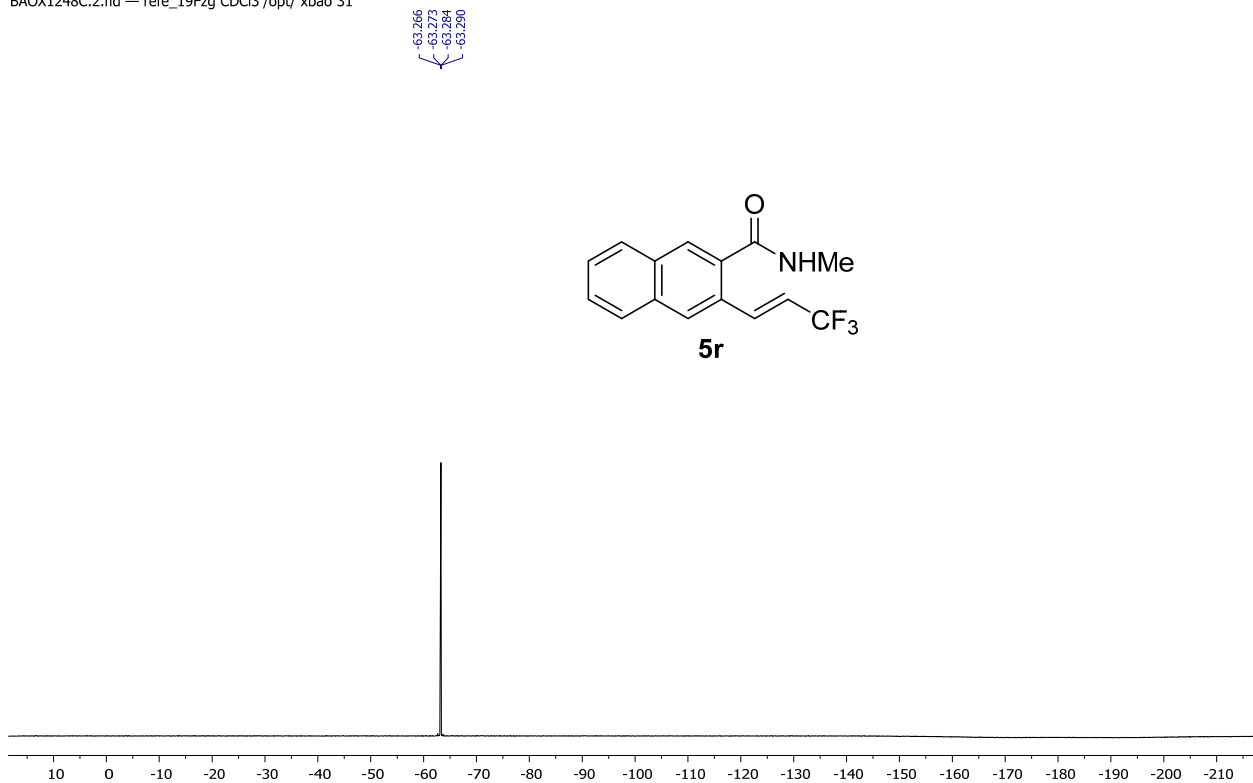

### Supplementary Figure 98. <sup>19</sup>F spectra of 5r



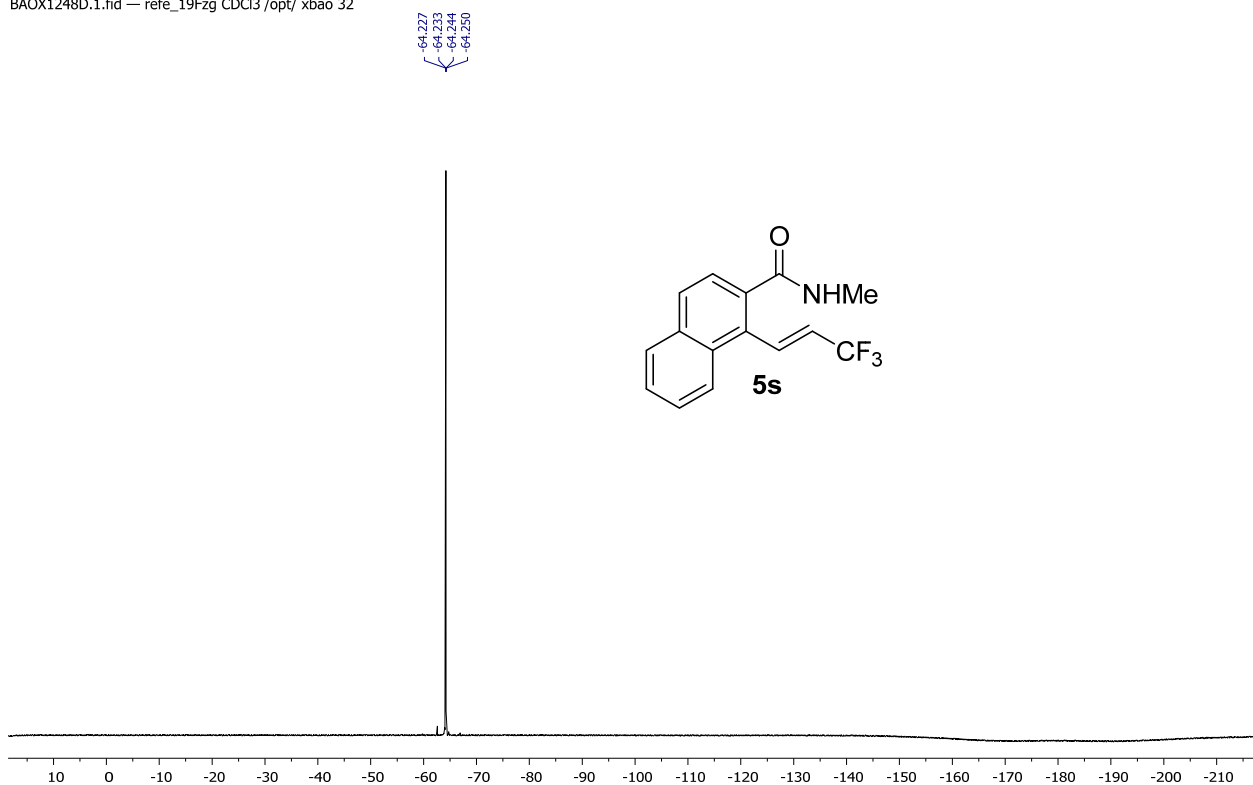

Supplementary Figure 101. <sup>19</sup>F spectra of **5s**

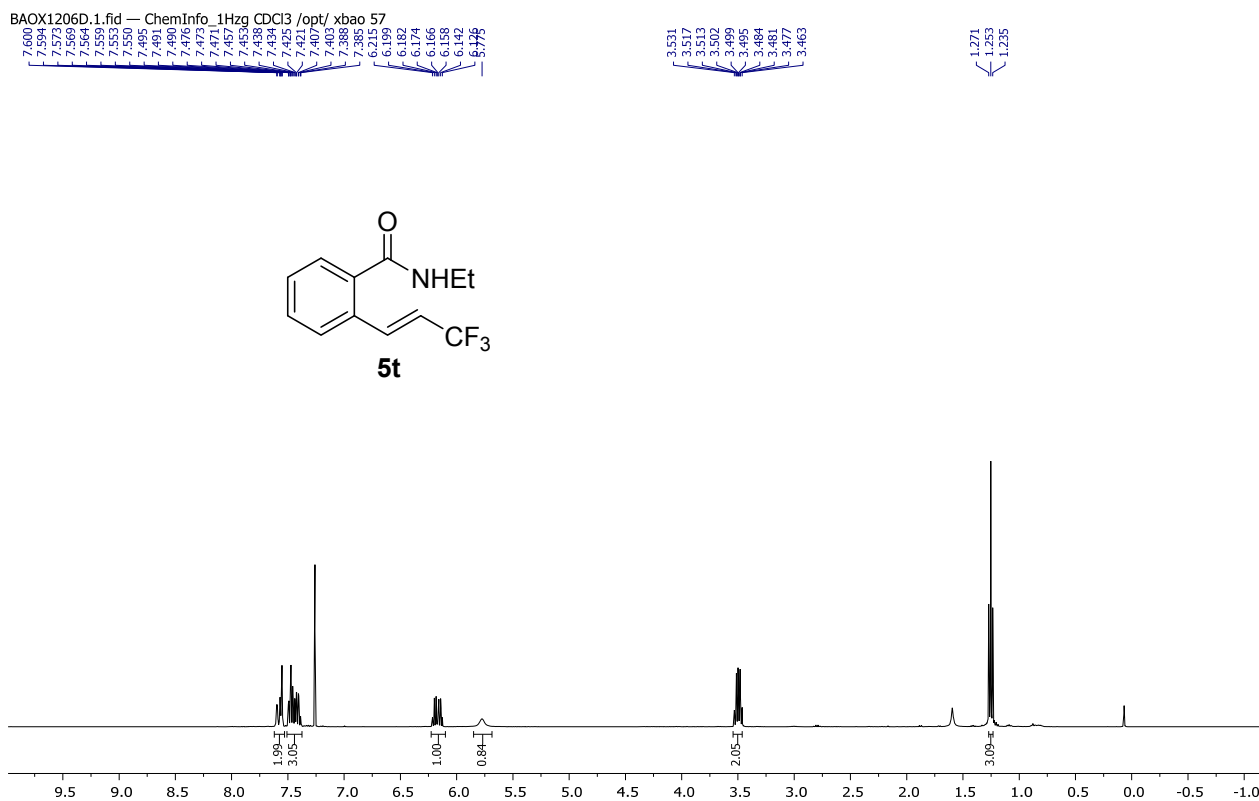

Supplementary Figure 102. <sup>1</sup>H spectra of **5t**

BAOX1206D.2.fid — ChemInfo\_13C\_cpd CDCl3 /opt/ xbao 57

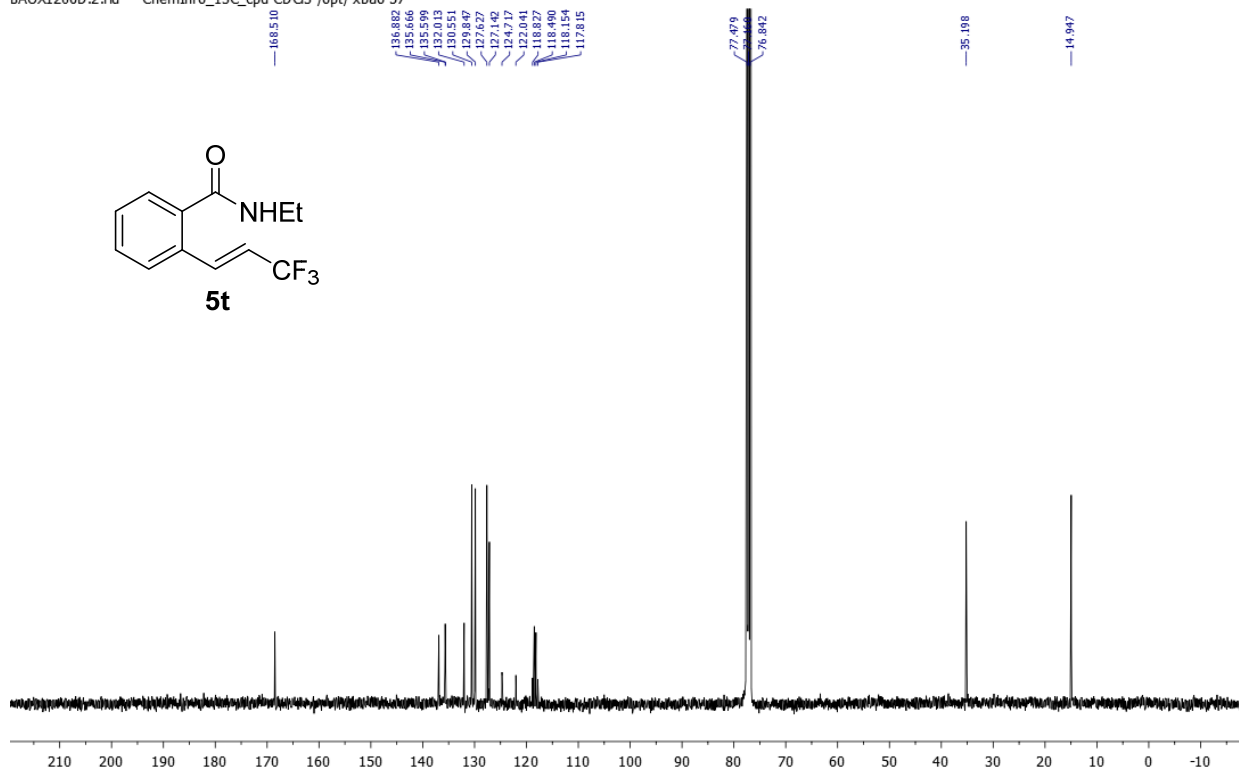

Supplementary Figure 103. <sup>13</sup>C NMR spectra of 5t

BAOX1206D.3.fid — ChemInfo\_19Fzg CDCl3 /opt/ xbao 57

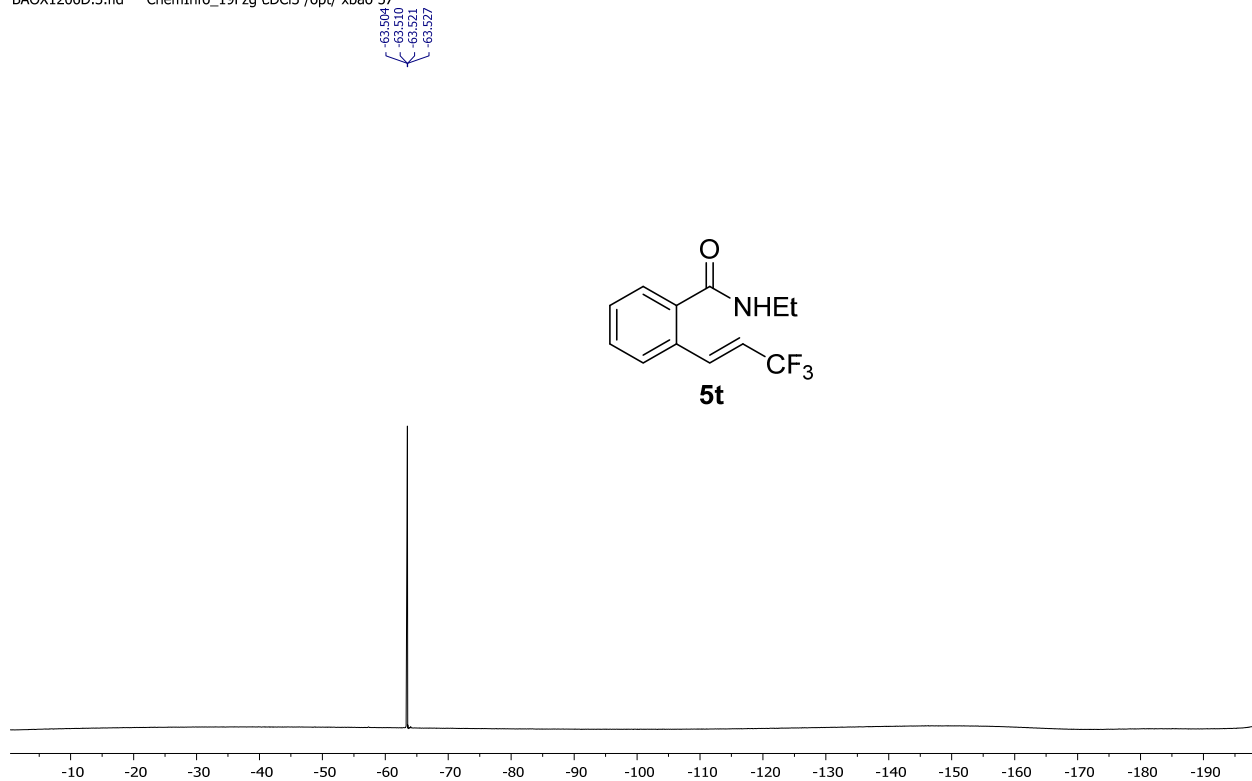

Supplementary Figure 104. <sup>19</sup>F spectra of 5t

BAOX1255B-B.1.fid — ChemInfo\_1Hzq CDCl3 /opt/ xbao 18

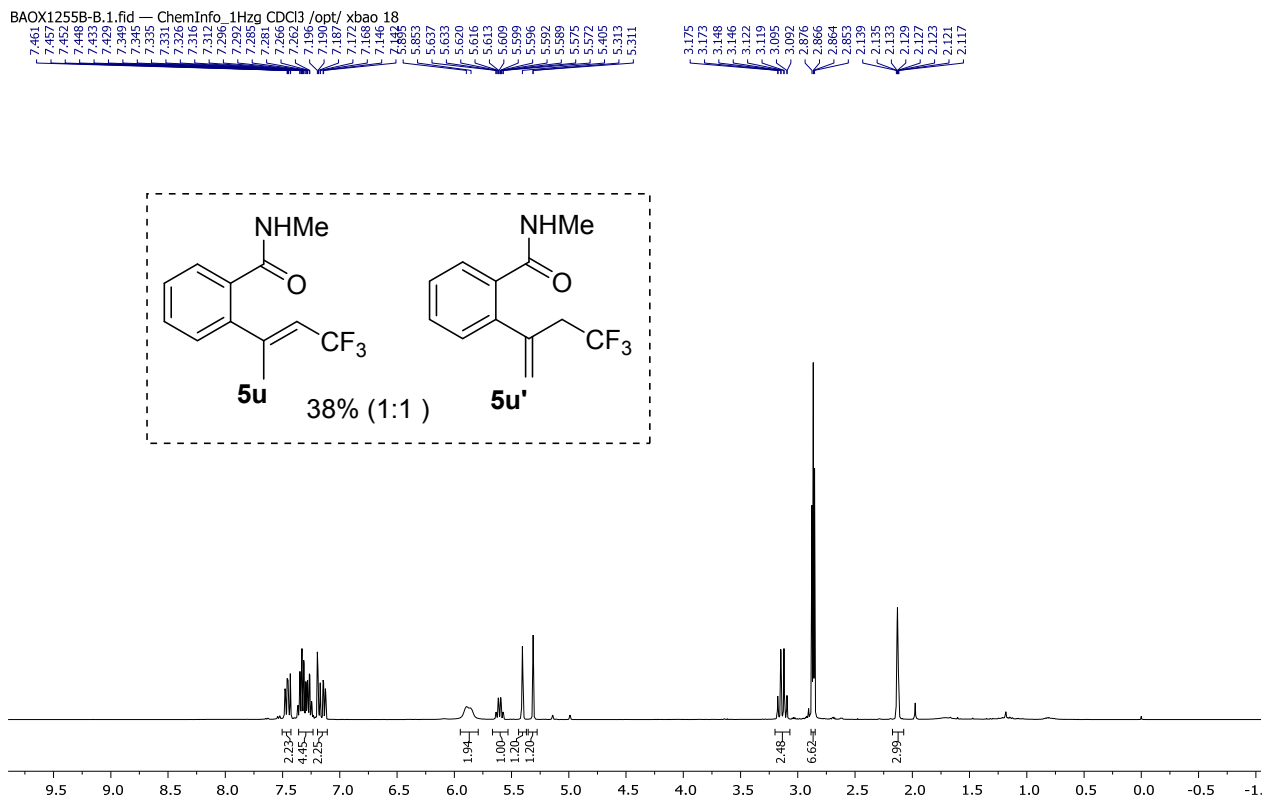

Supplementary Figure 105. <sup>1</sup>H spectra of 5u & 5u'

BAOX1255B-B.2.fid — ChemInfo\_13C\_cpd CDCl3 /opt/ xbao 18

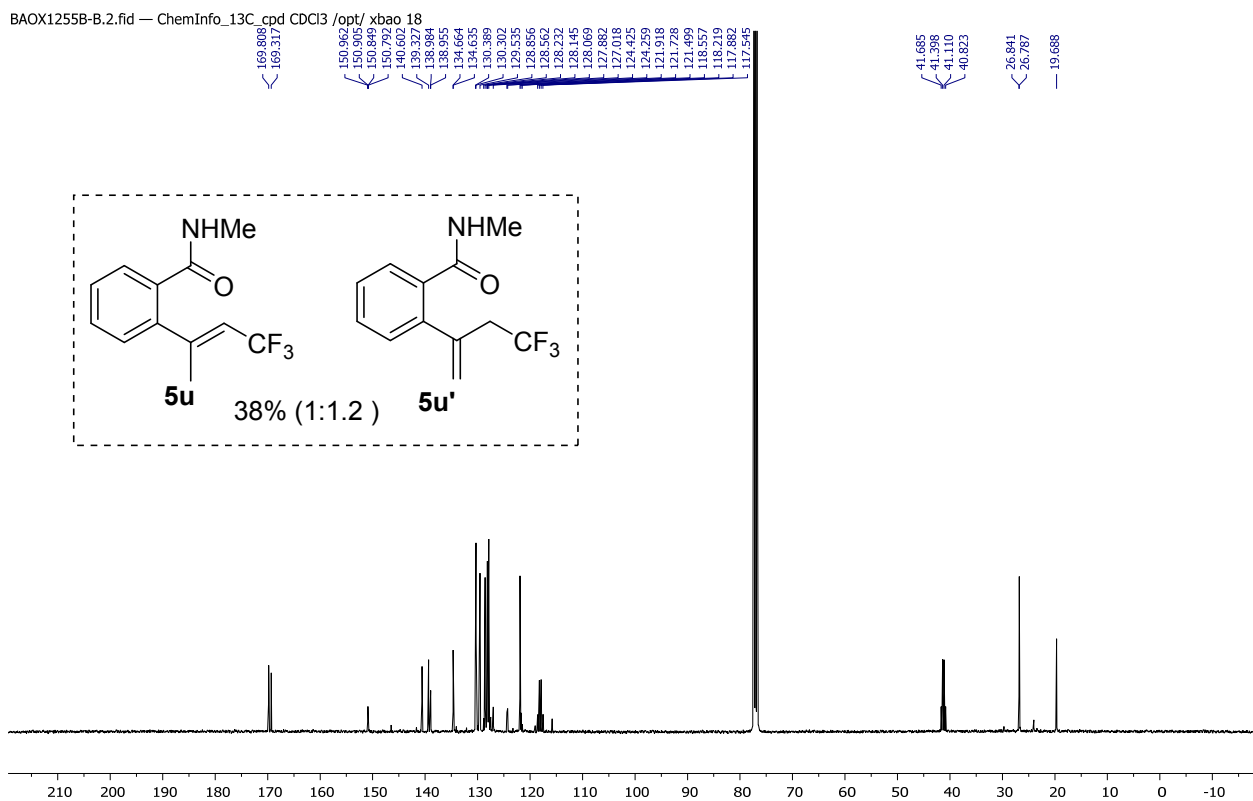

Supplementary Figure 106. <sup>13</sup>C NMR spectra of 5u & 5u'

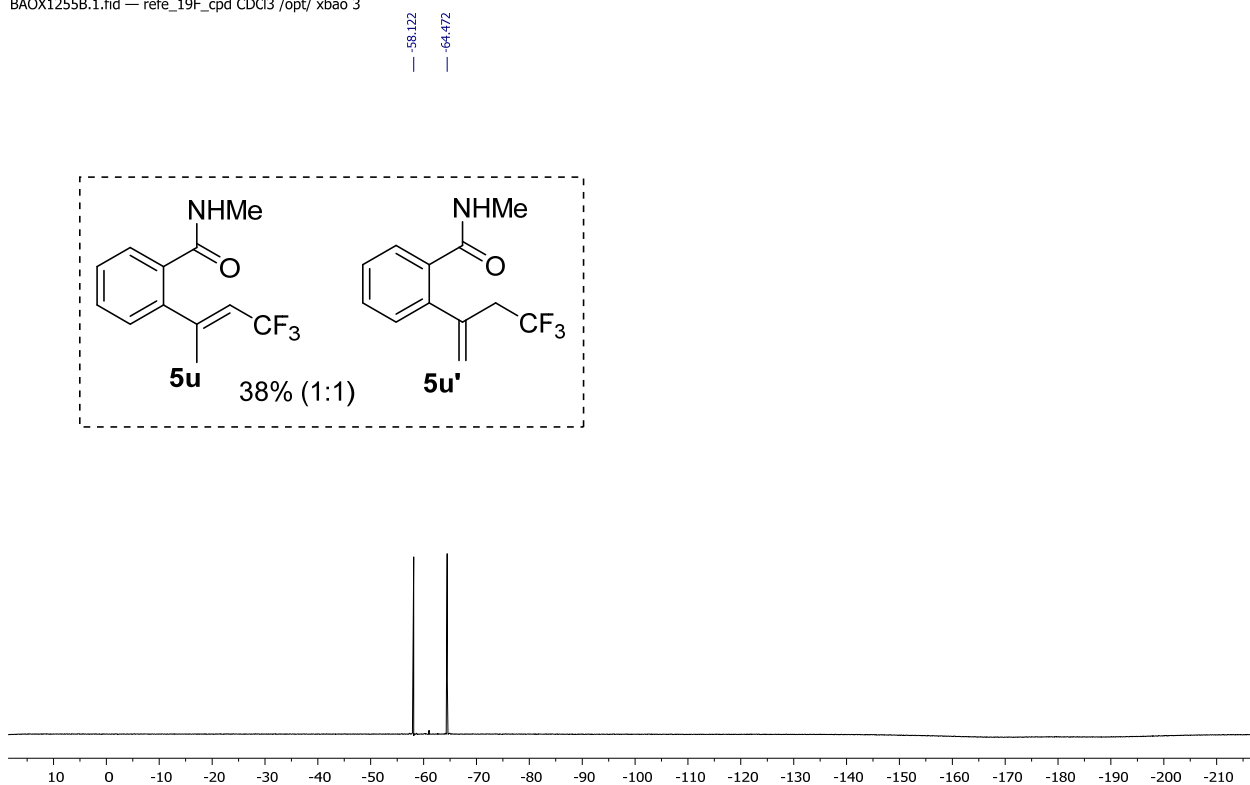

Supplementary Figure 107. <sup>19</sup>F spectra of 5u & 5u'

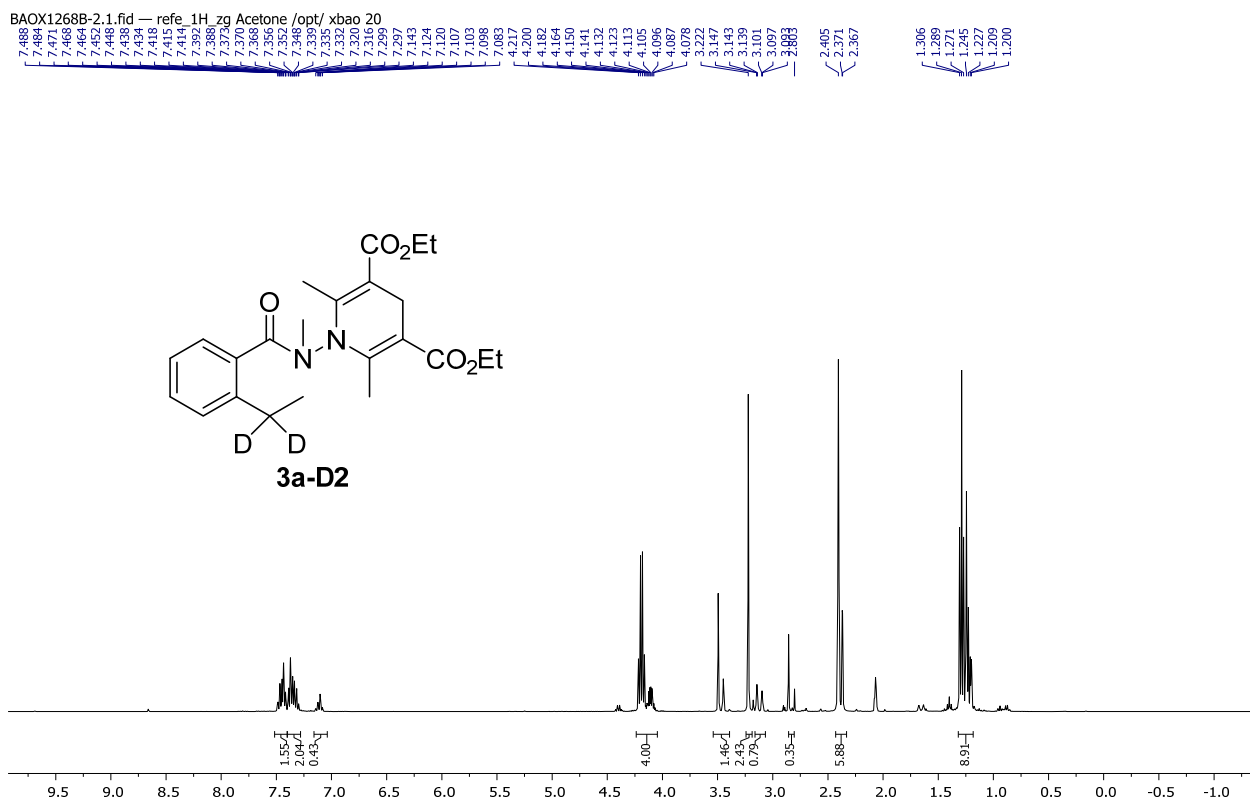

Supplementary Figure 108. <sup>1</sup>H spectra of 3a-D2

BAOX1268B-2.2.fid — refe\_13C\_cpd Acetone /opt/ xbao 20

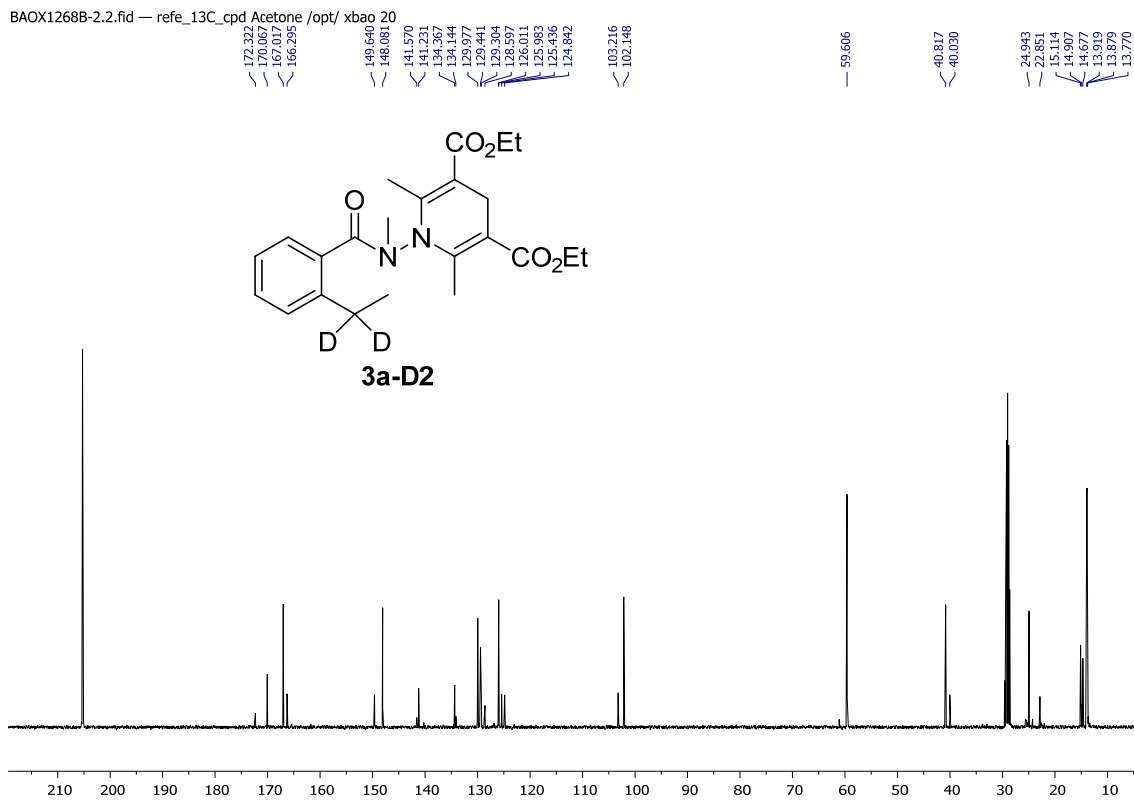

Supplementary Figure 109. <sup>13</sup>C NMR spectra of 3a-D2

BAOX1188E-B.1.fid — ChemInfo\_1Hzg CDCl3 /opt/ xbao 8

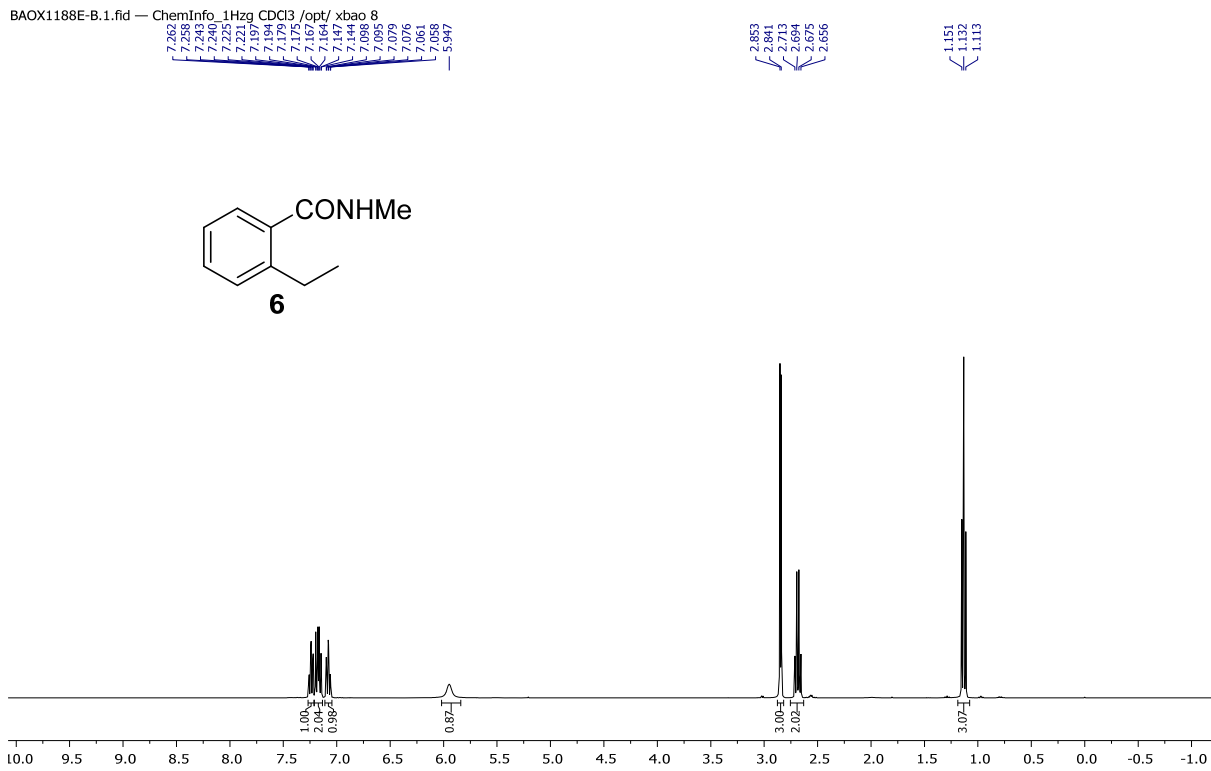

Supplementary Figure 110. <sup>1</sup>H NMR spectra of 6



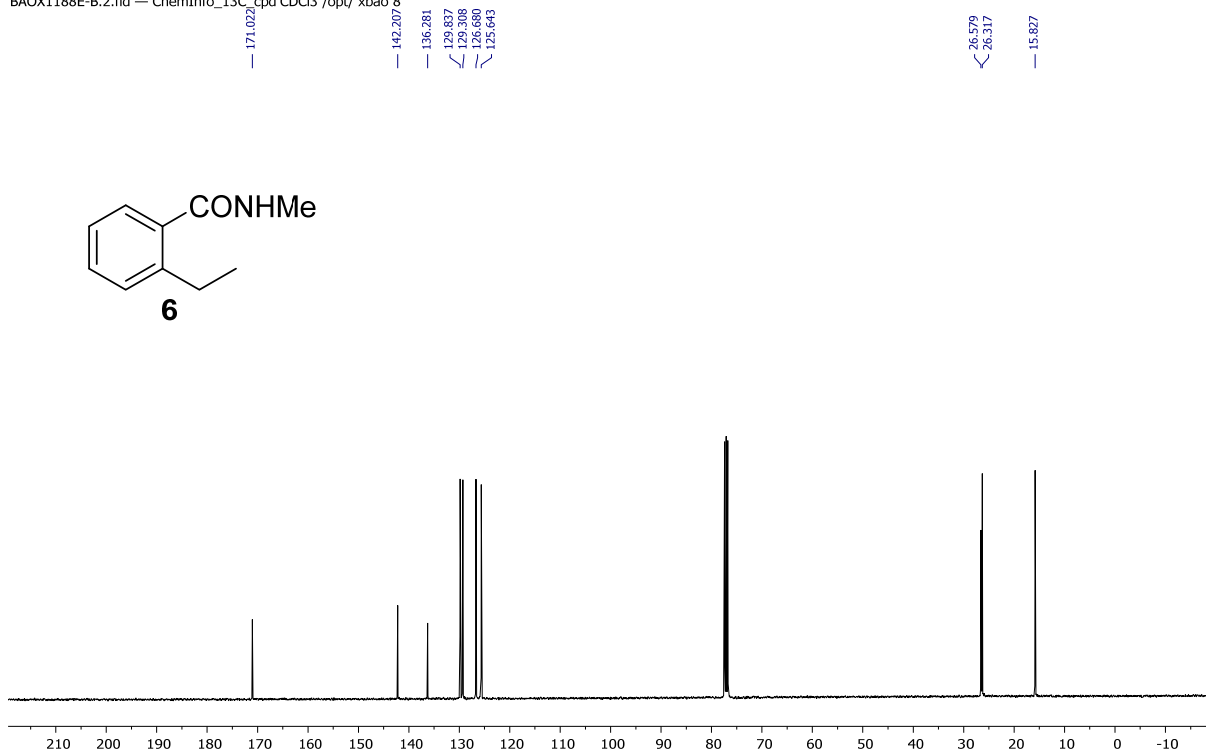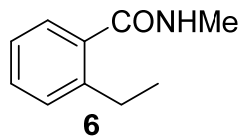

Supplementary Figure 111. <sup>13</sup>C NMR spectra of **6**

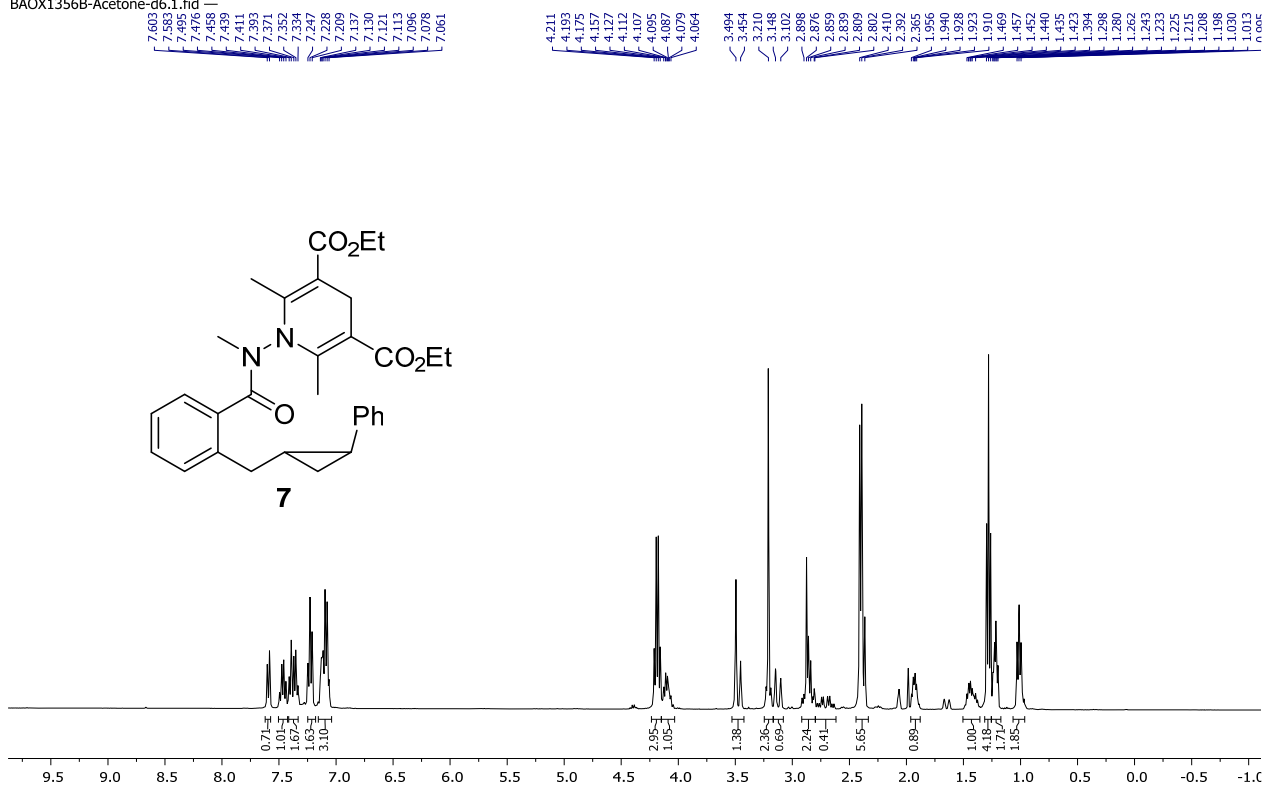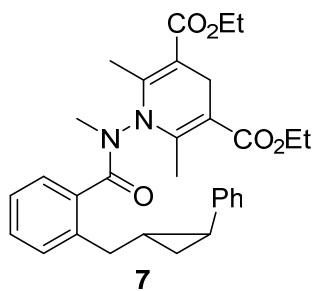

Supplementary Figure 112. <sup>1</sup>H spectra of **7**

BAOX1356B-Acetone-d6.2.fid —

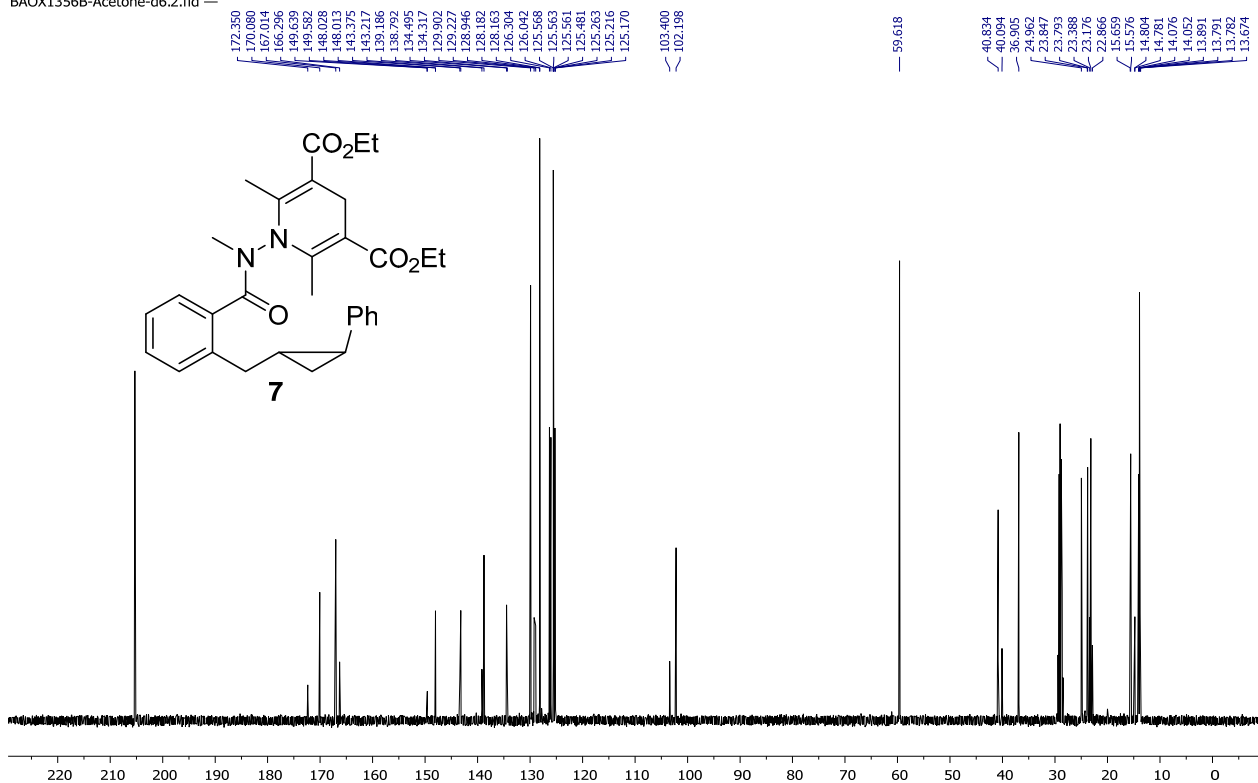

Supplementary Figure 113.  $^{13}\text{C}$  NMR spectra of 7

BAOX1356C-2.1.fid —

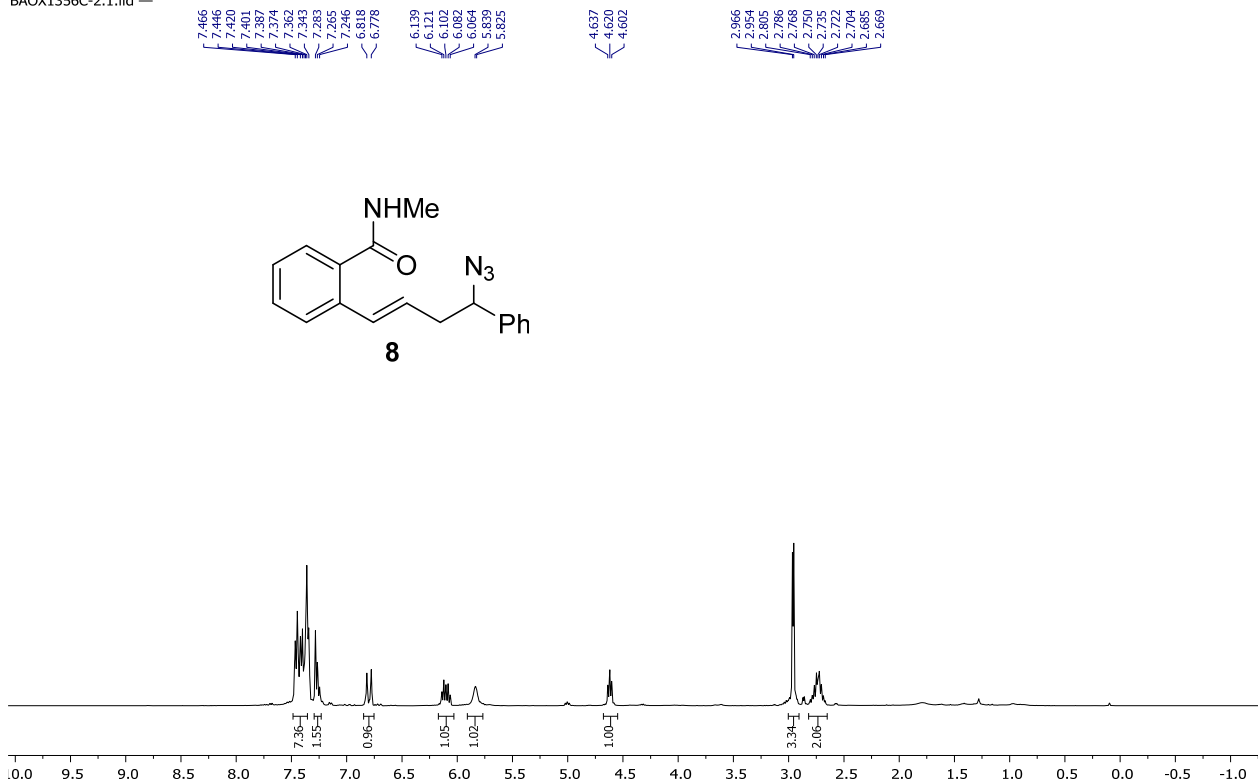

Supplementary Figure 114.  $^1\text{H}$  spectra of 8

BAOX1356C-2.2.fid —

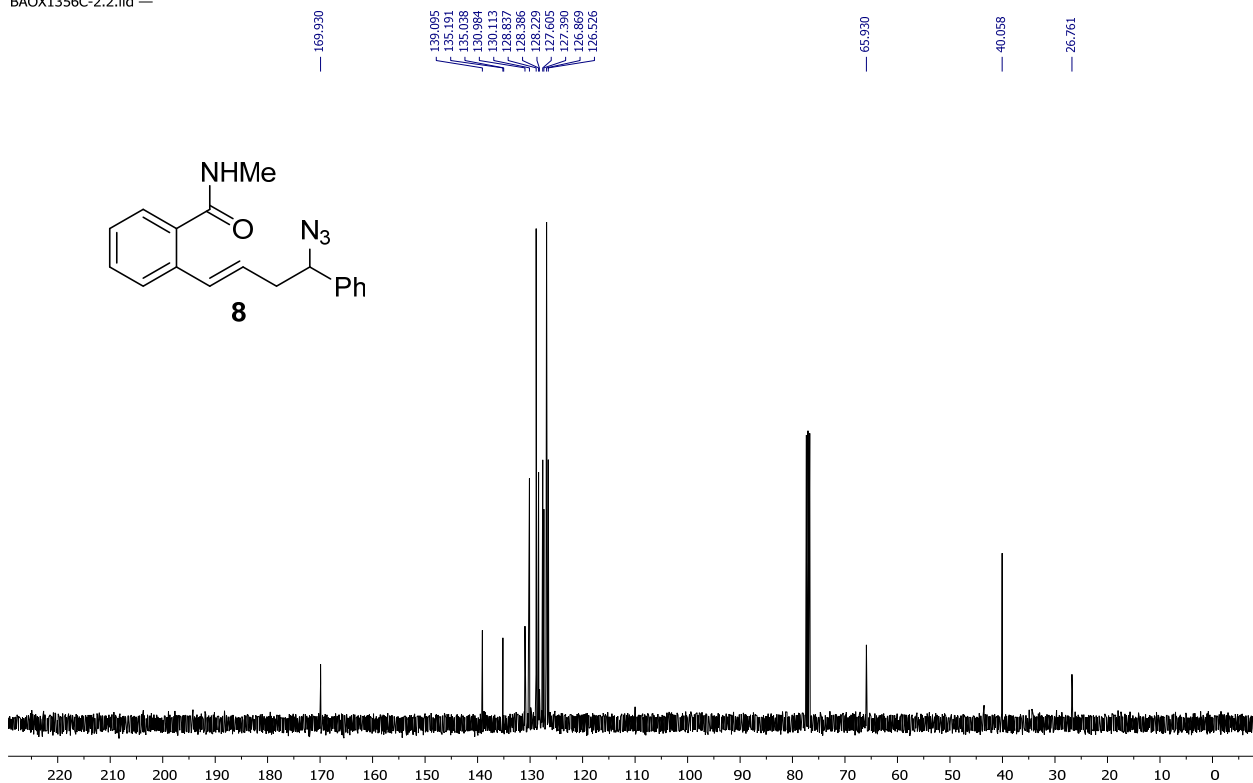

Supplementary Figure 115.  $^{13}\text{C}$  NMR spectra of 8

BAOX1313A.1.fid —

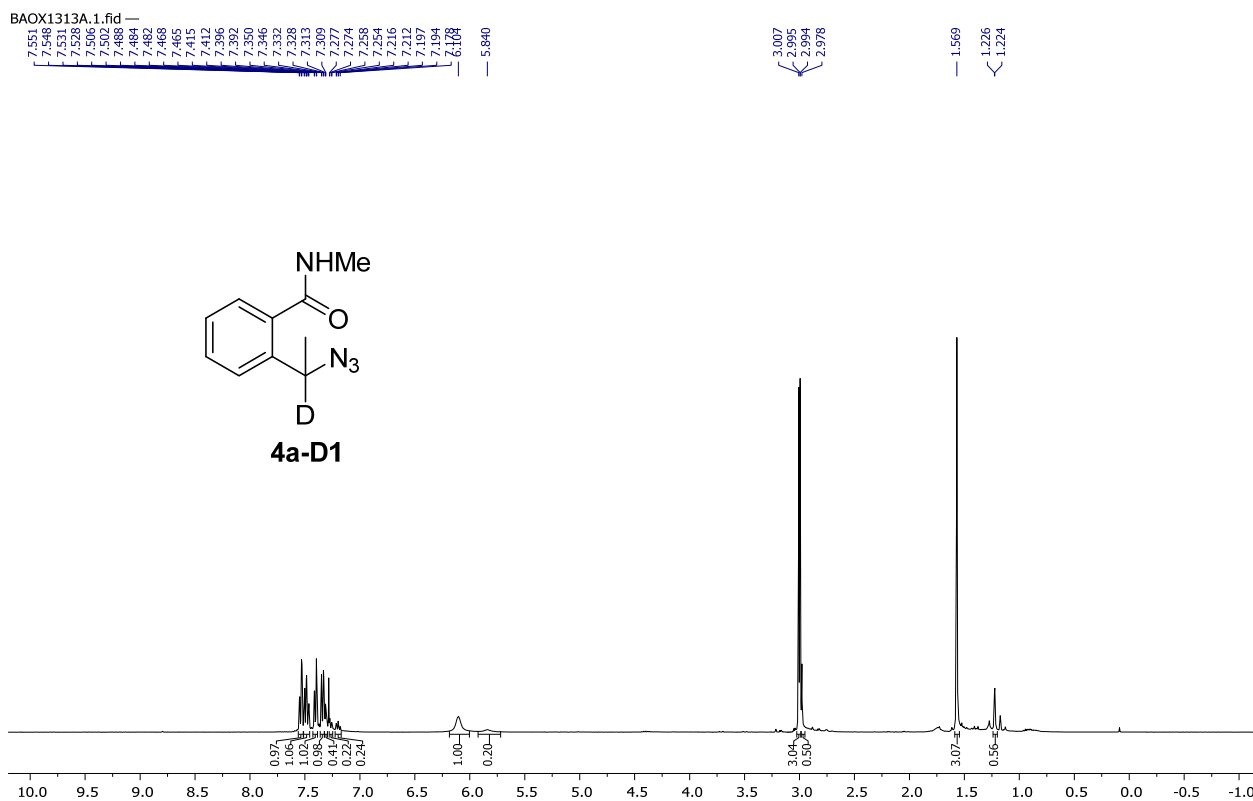

Supplementary Figure 116.  $^1\text{H}$  spectra of 4a-D1

BAOX1313A.2.fid —

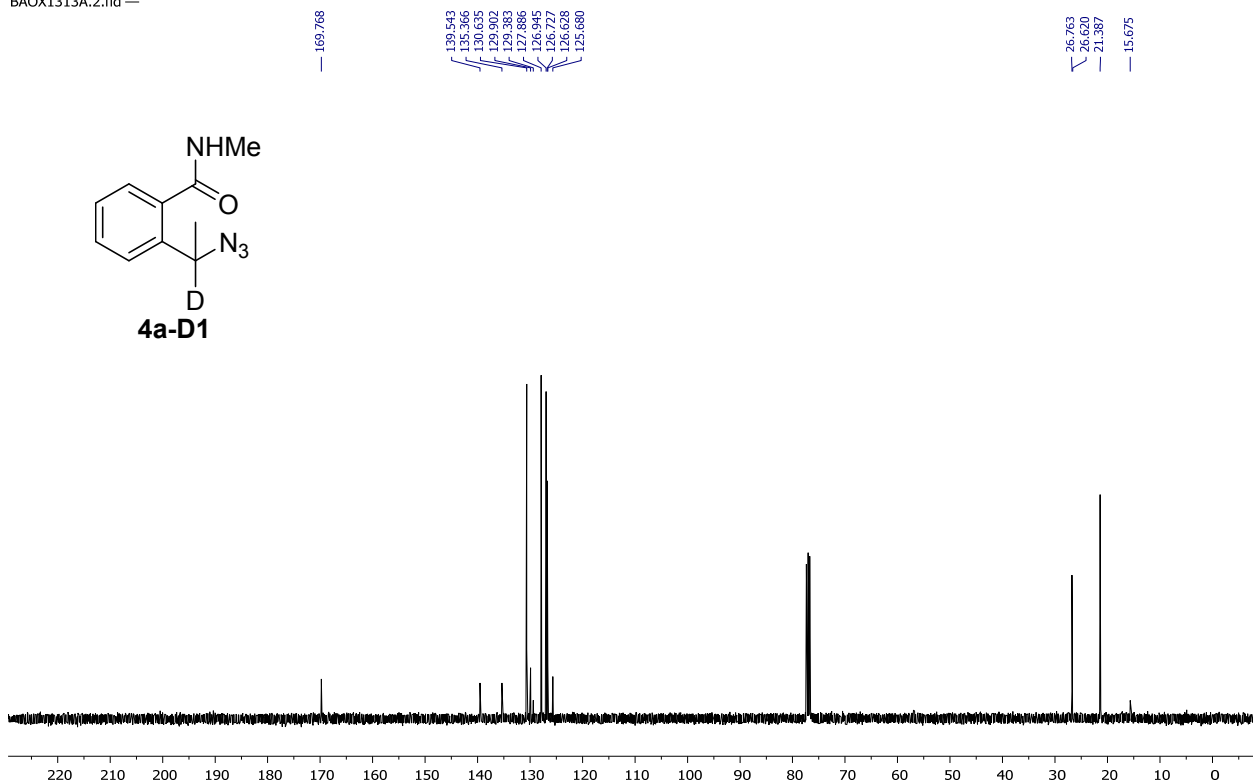

Supplementary Figure 117. <sup>13</sup>C NMR spectra of 4a-D1

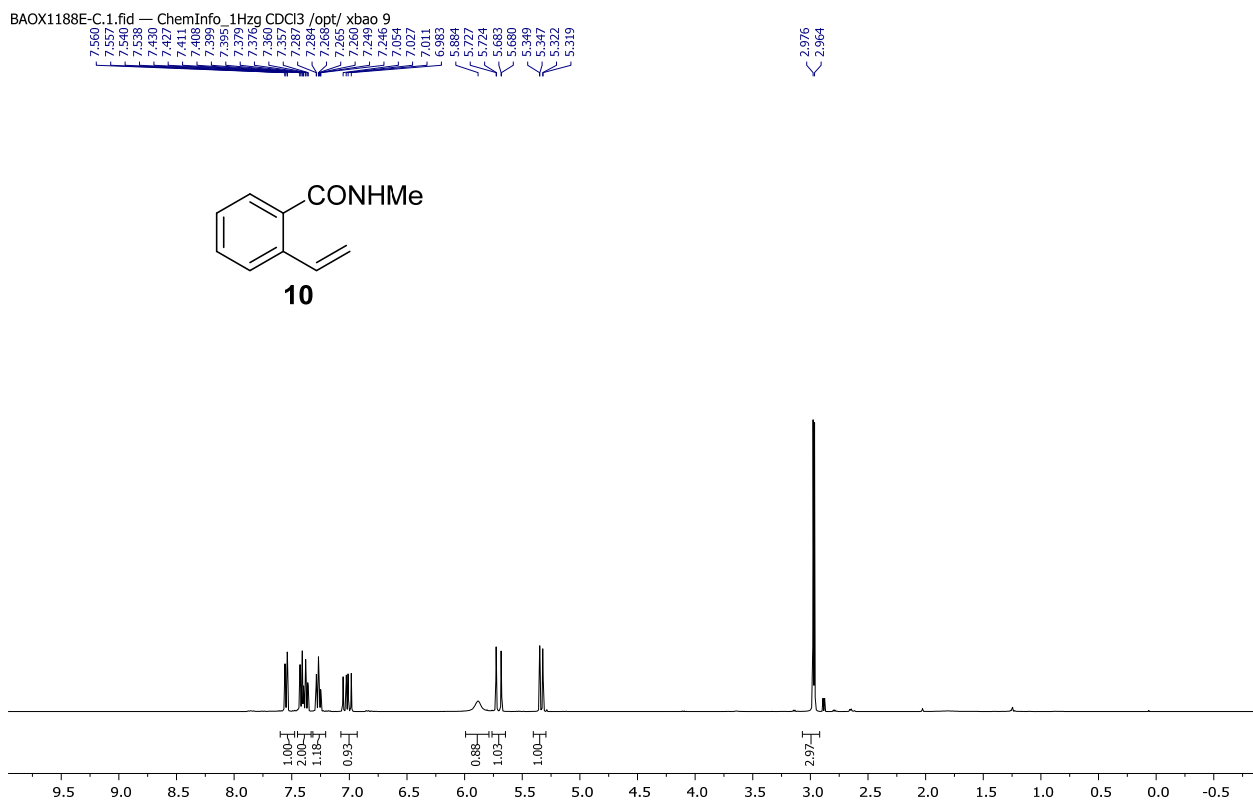

Supplementary Figure 118. <sup>1</sup>H spectra of 10

BAOX1188E-C.2.fid — ChemInfo\_13C\_cpdc DCI3 /opt/ xbao 9

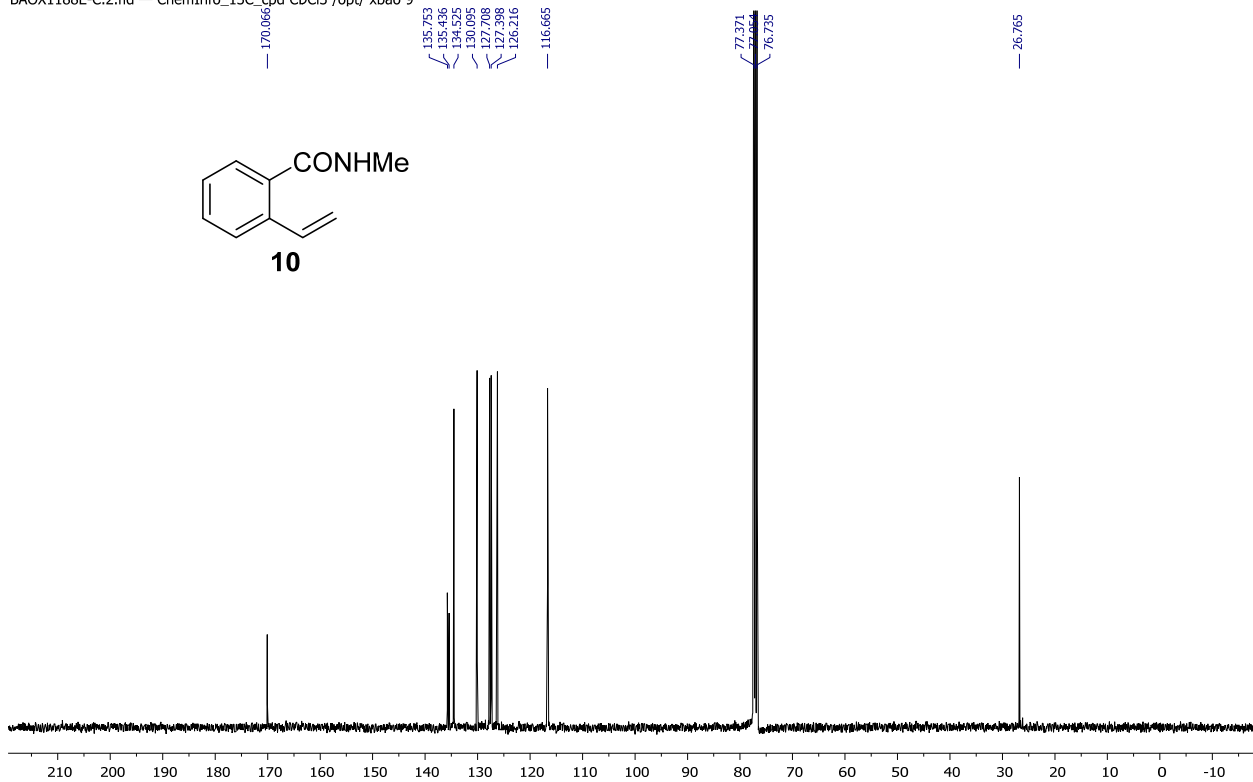

Supplementary Figure 119. <sup>13</sup>C NMR spectra of 10

BAOX1268C.1.fid — ChemInfo\_1Hzq DCI3 /opt/ xbao 21

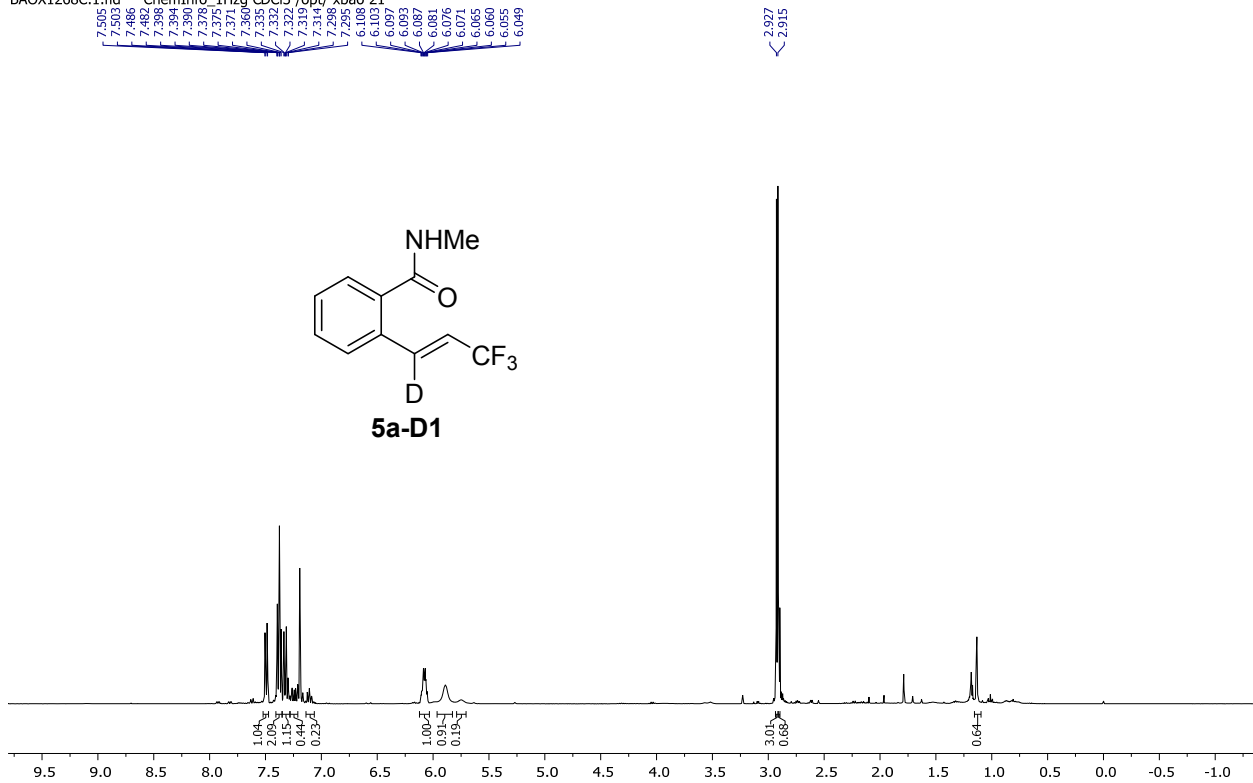

Supplementary Figure 120. <sup>1</sup>H spectra of 5a-D1

BAOX1268C.2.fid — ChemInfo\_13C\_cpq CDC3 /opt/ xbao 21

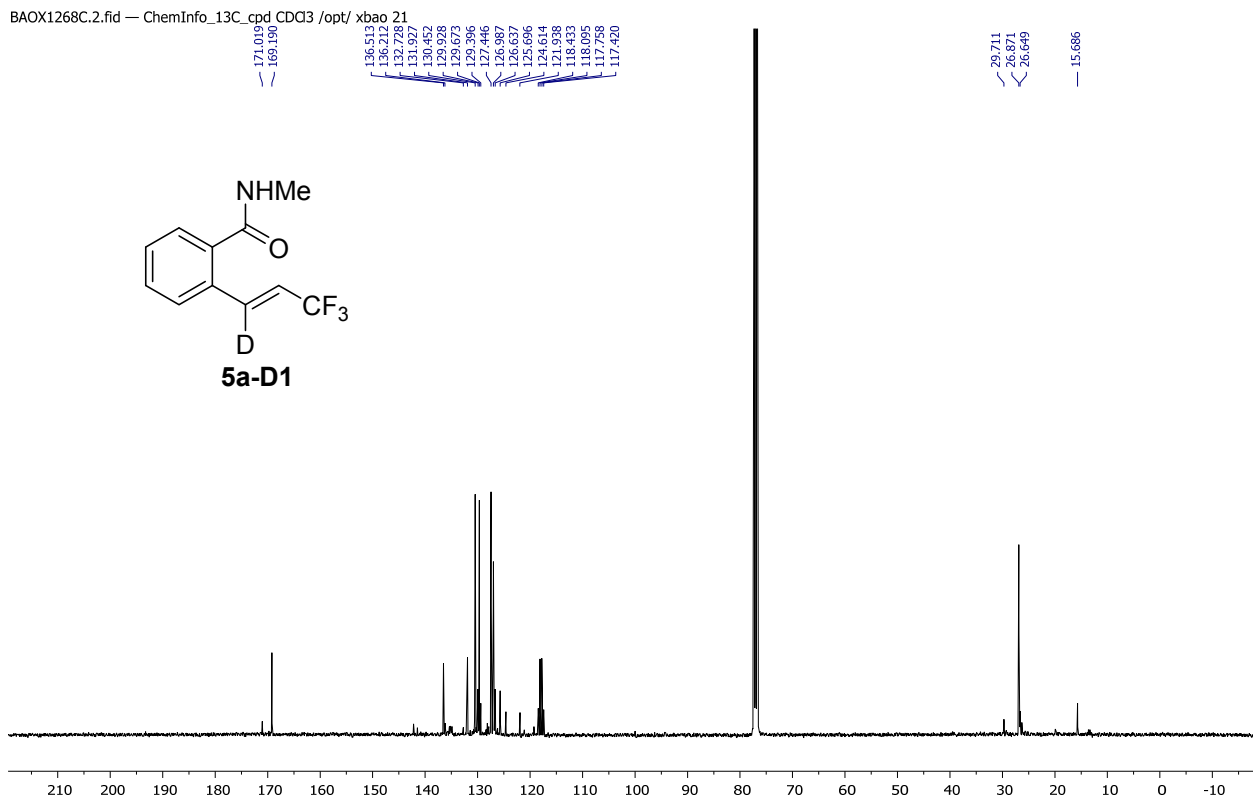

Supplementary Figure 121. <sup>13</sup>C NMR spectra of 5a-D1

BAOX1325A.1.fid —

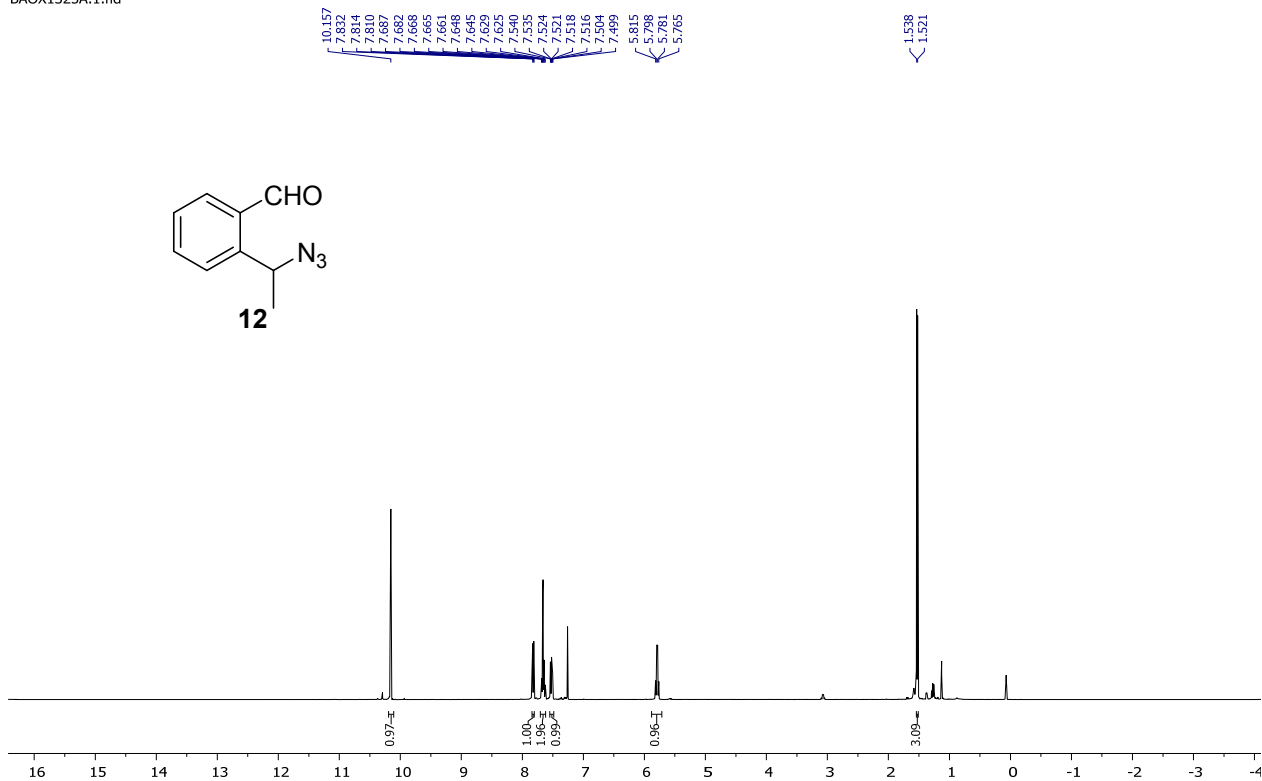

Supplementary Figure 122. <sup>1</sup>H spectra of 12

BAOX1325A.3.fid —

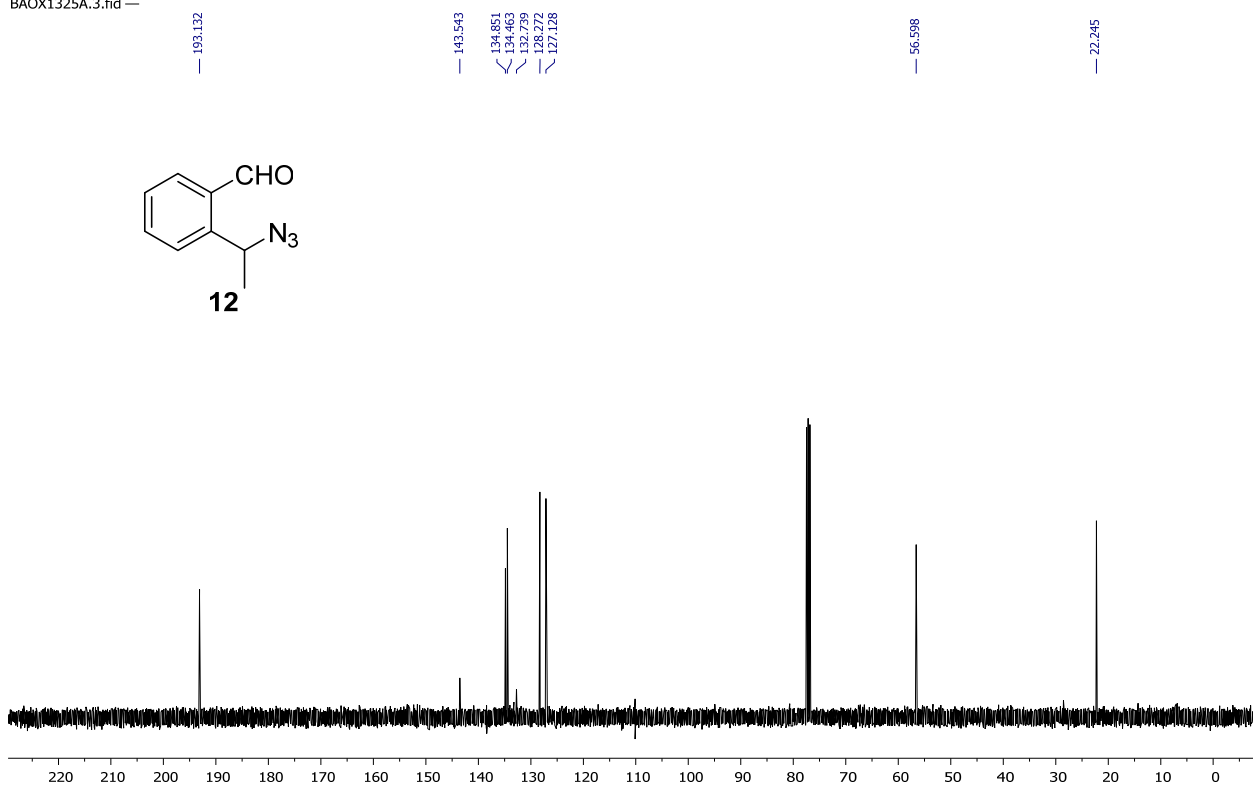

Supplementary Figure 123. <sup>13</sup>C NMR spectra of 12

BAOX1324C.1.fid — refe\_1H\_zg CDCl3 /opt/ xbao 44

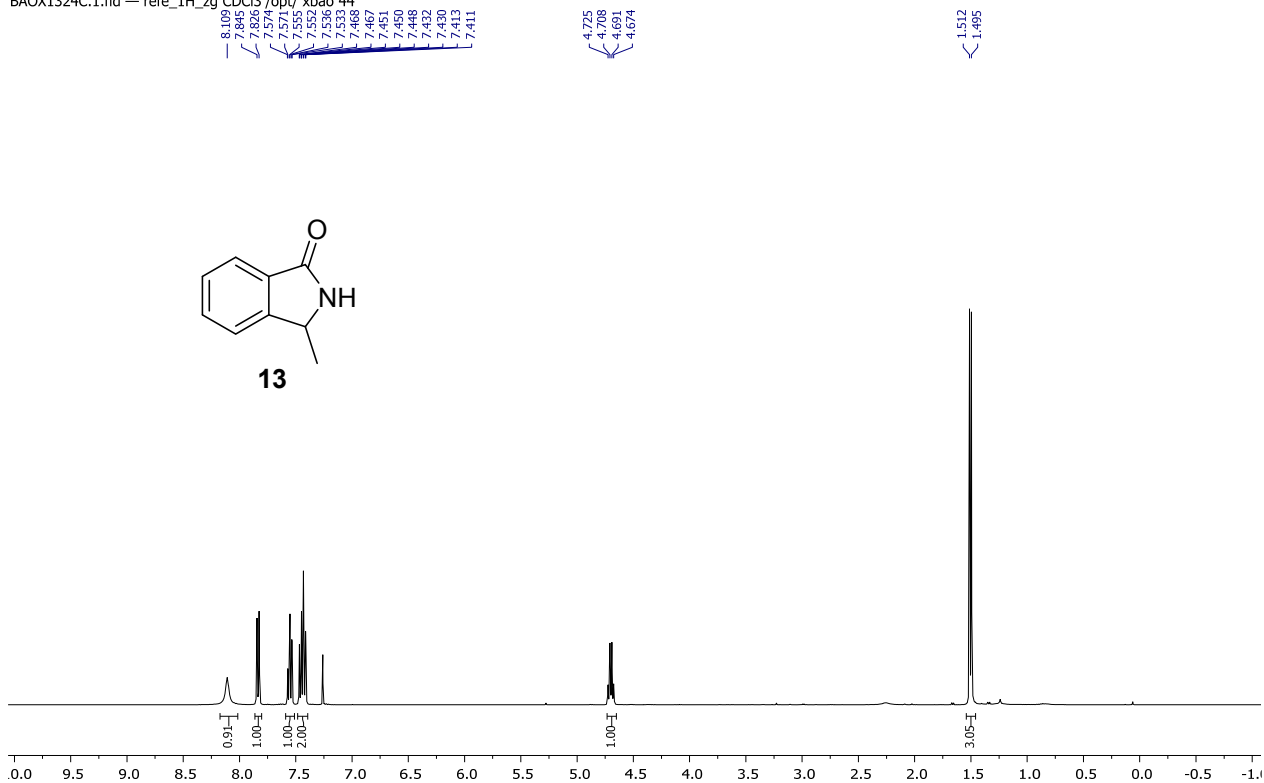

Supplementary Figure 124. <sup>1</sup>H spectra of 13

BAOX1324C.2.fid — refe\_13C\_cpd CDCl3 /opt/ xbao 44

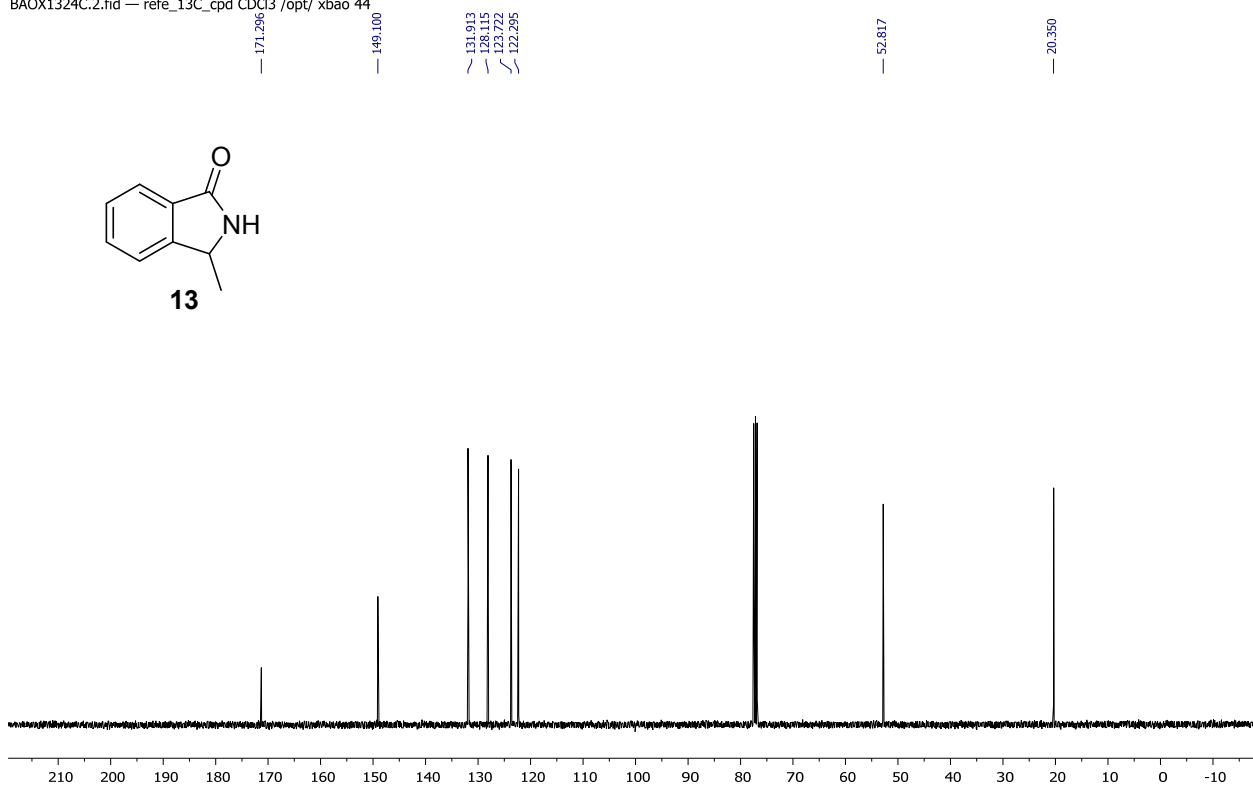

Supplementary Figure 125. <sup>13</sup>C NMR spectra of 13

BAOX1325C.1.fid —

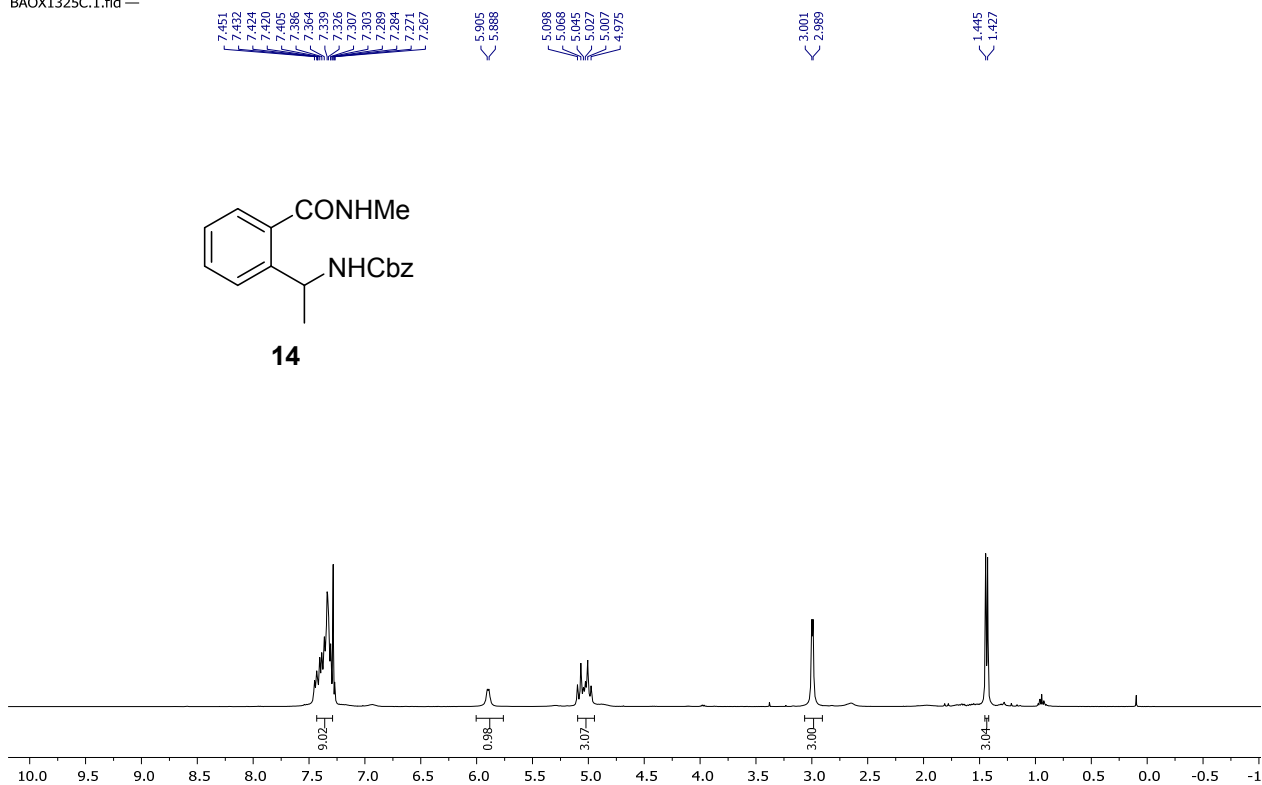

Supplementary Figure 126. <sup>1</sup>H spectra of 14



BAOX1325C.2.fid

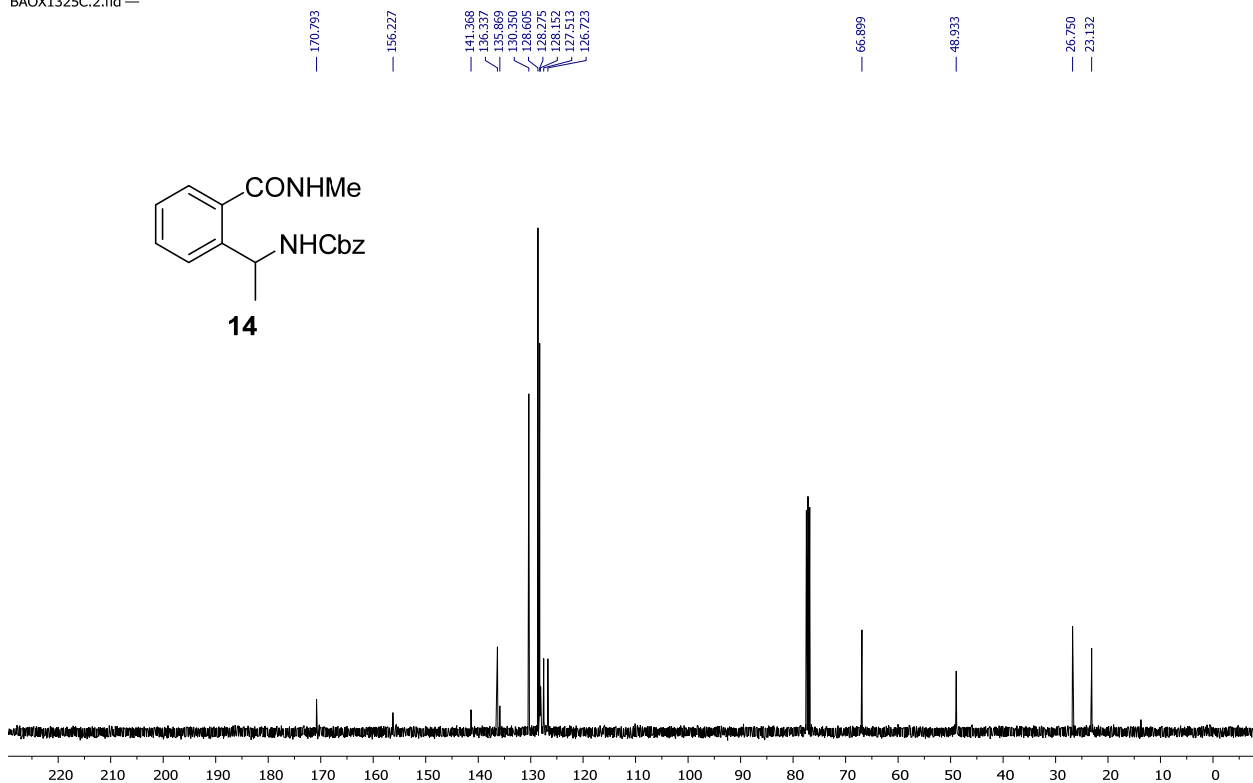

Supplementary Figure 127. <sup>13</sup>C NMR spectra of 14

BAOX1324B.1.fid

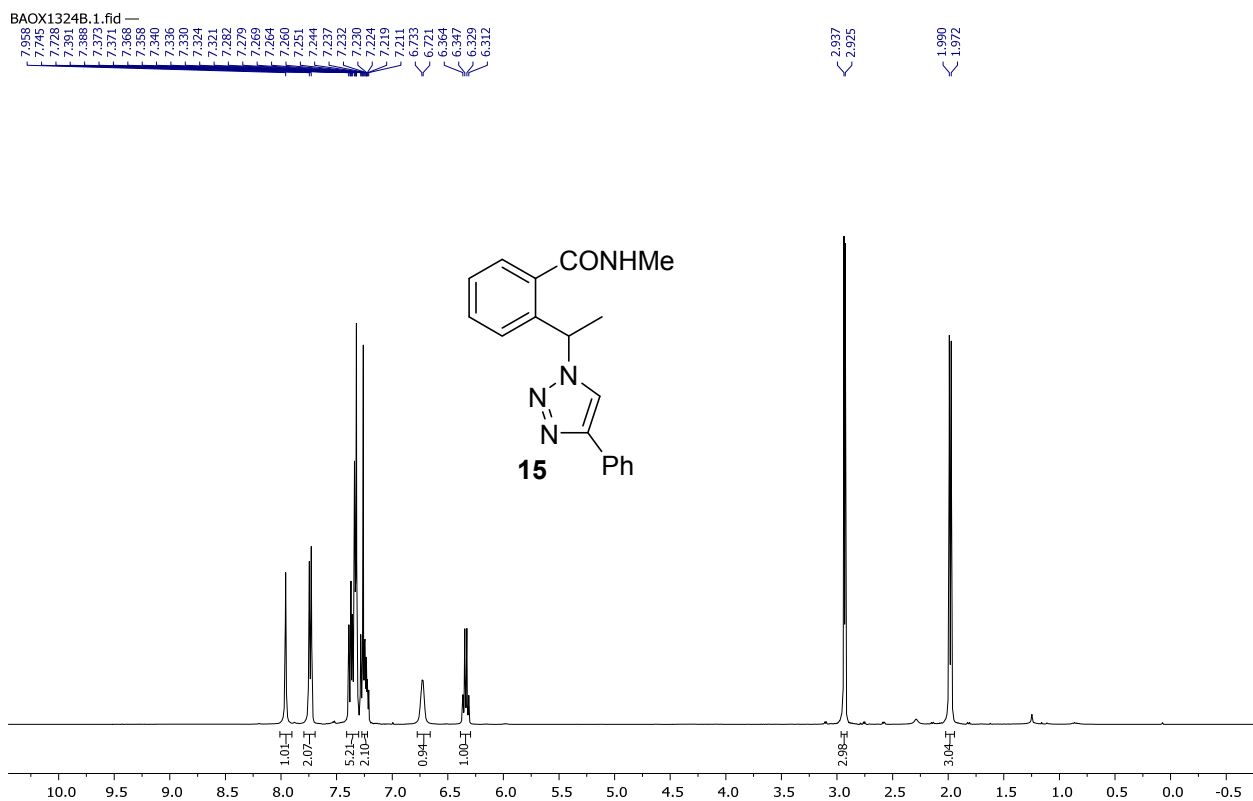

Supplementary Figure 128. <sup>1</sup>H spectra of 15

BAOX1324B.2.fid —

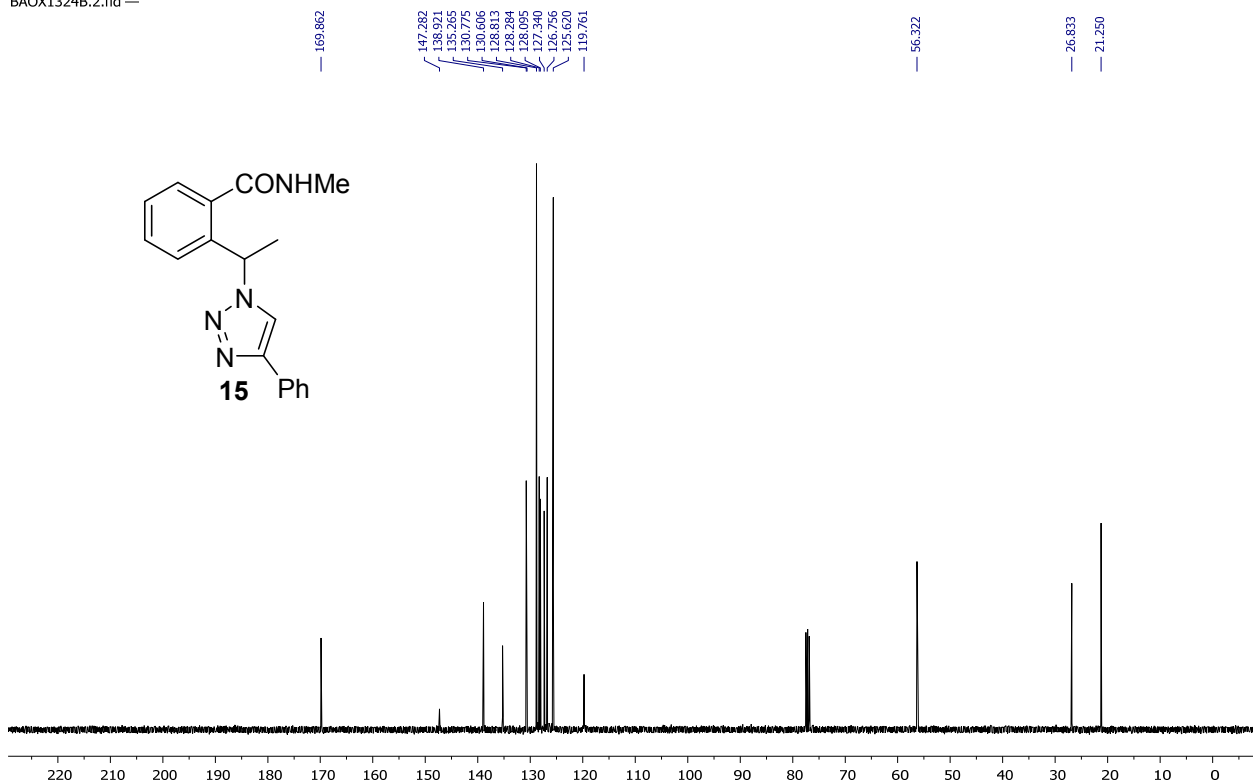

Supplementary Figure 129. <sup>13</sup>C NMR spectra of 14

BAOX1264C.1.fid — ChemInfo\_1Hzg CDCl3 /opt/ xbao 59

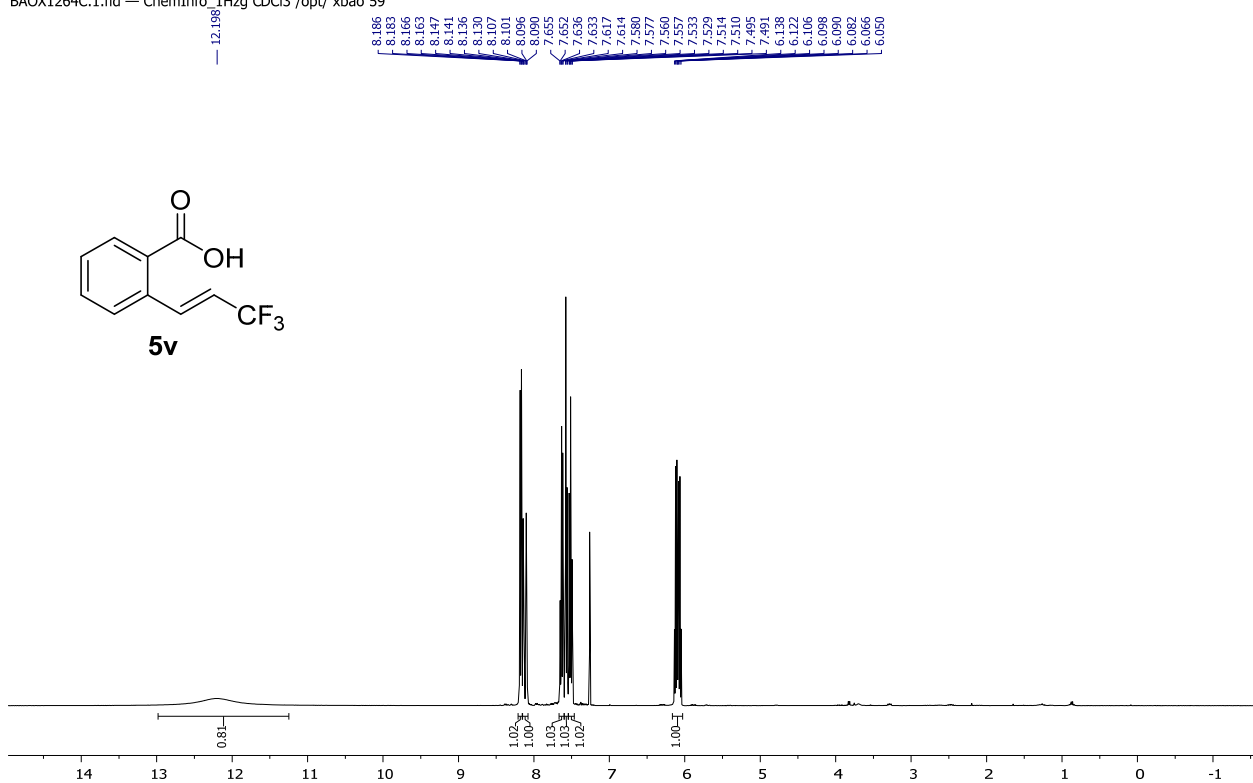

Supplementary Figure 130. <sup>1</sup>H spectra of 5v

BAOX1264C.2.fid — refe\_13C\_cpd CDCl3 /opt/ xbao 59

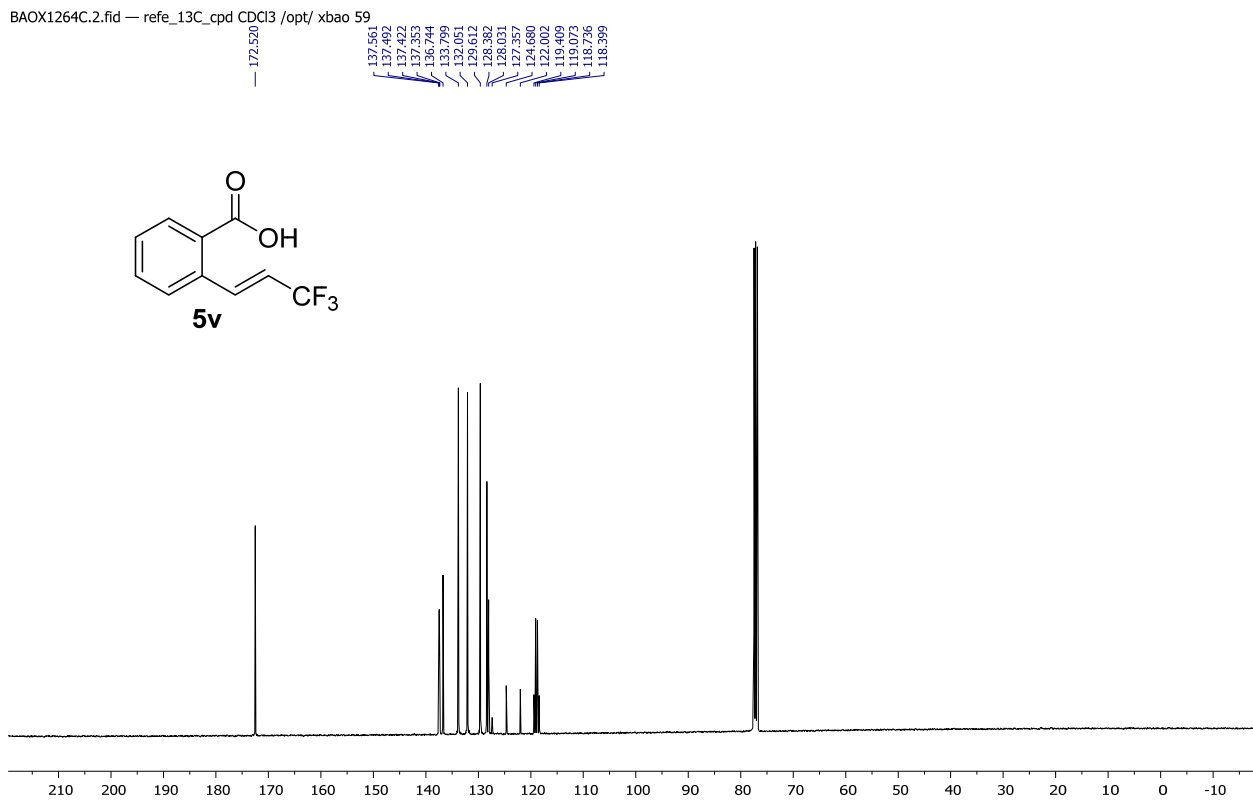

Supplementary Figure 131. <sup>13</sup>C NMR spectra of 5v

BAOX1264C.2.fid — ChemInfo\_19Fzg CDCl3 /opt/ xbao 6

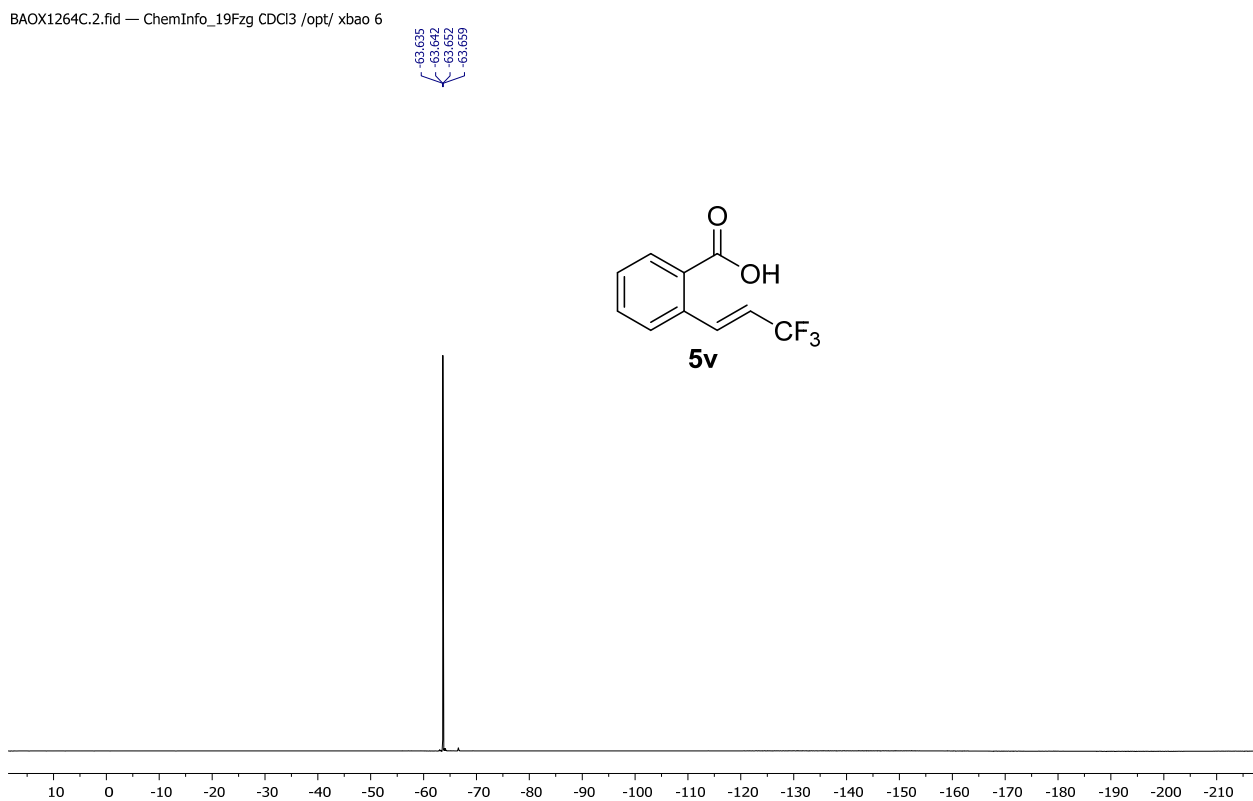

Supplementary Figure 132. <sup>19</sup>F spectra of 5v

## Supplementary Tables

**Supplementary Table 1: Copper-catalyzed  $\gamma$ -azidation of 2-ethyl benzohydrazide 3a: Cu(II) salts and organic peroxides screening.<sup>a</sup>**

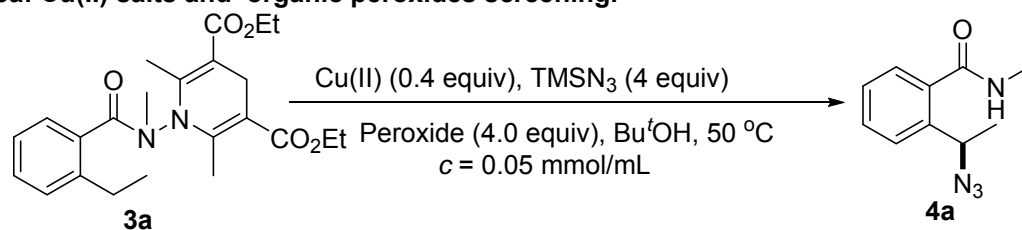

| Entry | Cu(II)                                                | Peroxide                      | Yield/% <sup>b</sup> |
|-------|-------------------------------------------------------|-------------------------------|----------------------|
| 1     | Cu(OAc) <sub>2</sub>                                  | TBHP                          | 58                   |
| 2     | Cu(OTf) <sub>2</sub>                                  | TBHP                          | 40                   |
| 3     | CuSO <sub>4</sub>                                     | TBHP                          | 56                   |
| 4     | CuF <sub>2</sub>                                      | TBHP                          | 56                   |
| 5     | Cu(acac) <sub>2</sub>                                 | TBHP                          | 62                   |
| 6     | Cu(ClO <sub>4</sub> ) <sub>2</sub> ·6H <sub>2</sub> O | TBHP                          | 72                   |
| 7     | Cu(BF <sub>4</sub> ) <sub>2</sub> ·6H <sub>2</sub> O  | TBHP                          | 60                   |
| 8     | Cu(NO <sub>3</sub> ) <sub>2</sub> ·2H <sub>2</sub> O  | TBHP                          | 64                   |
| 9     | CuBr <sub>2</sub>                                     | TBHP                          | 44                   |
| 10    | Cu(ClO <sub>4</sub> ) <sub>2</sub> ·6H <sub>2</sub> O | DTBP                          | trace                |
| 11    | Cu(ClO <sub>4</sub> ) <sub>2</sub> ·6H <sub>2</sub> O | H <sub>2</sub> O <sub>2</sub> | trace                |
| 12    | Cu(ClO <sub>4</sub> ) <sub>2</sub> ·6H <sub>2</sub> O | CHP                           | 64                   |
| 13    | Cu(ClO <sub>4</sub> ) <sub>2</sub> ·6H <sub>2</sub> O | TBPB                          | 60                   |
| 14    | Cu(ClO <sub>4</sub> ) <sub>2</sub> ·6H <sub>2</sub> O | <i>t</i> BuOOAc               | 82                   |
| 15    | Cu(ClO <sub>4</sub> ) <sub>2</sub> ·6H <sub>2</sub> O | DCP                           | trace                |

[a] **3a** (0.1 mmol, 1.0 equiv), TMSN<sub>3</sub> (4.0 equiv), Cu(II) (0.4 equiv), peroxide (4.0 equiv), and *t*BuOH (2.0 mL) at 50 °C. [b] Yield was determined by <sup>1</sup>H NMR spectroscopy with CH<sub>2</sub>Br<sub>2</sub> as an internal standard.

**Supplementary Table 2: Copper-catalyzed  $\gamma$ -azidation of 2-ethyl benzohydrazide 3a: solvents screening.<sup>a</sup>**

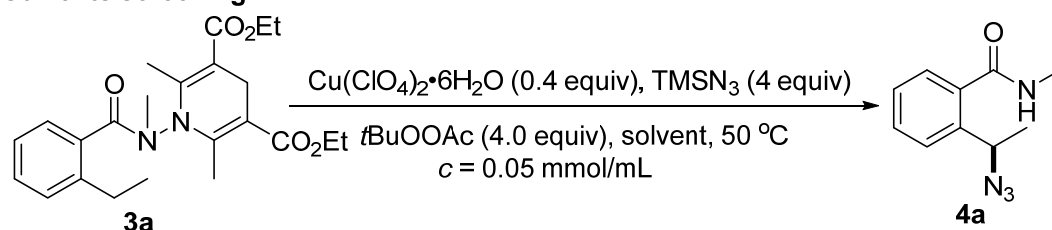

| Entry | Solvent                           | Yield/% <sup>b</sup> |
|-------|-----------------------------------|----------------------|
| 1     | <i>t</i> BuOH                     | 82                   |
| 2     | DCE                               | 52                   |
| 3     | 1,4-dioxane                       | 52                   |
| 4     | EtOAc                             | 36                   |
| 5     | $\text{CF}_3\text{CH}_2\text{OH}$ | 24                   |
| 6     | $\text{CH}_3\text{CN}$            | 48                   |

[a] **3a** (0.1 mmol, 1.0 equiv),  $\text{TMSN}_3$  (4.0 equiv),  $\text{Cu}(\text{ClO}_4)_2 \cdot 6\text{H}_2\text{O}$  (0.4 equiv), *t*BuOOAc (4.0 equiv), and solvent (2.0 mL) at 50 °C. [b] Yield was determined by <sup>1</sup>H NMR spectroscopy with  $\text{CH}_2\text{Br}_2$  as an internal standard.

**Supplementary Table 3: Copper-catalyzed  $\gamma$ -azidation of 2-ethyl benzohydrazide 3a: Cu(I) salts screening.<sup>a</sup>**

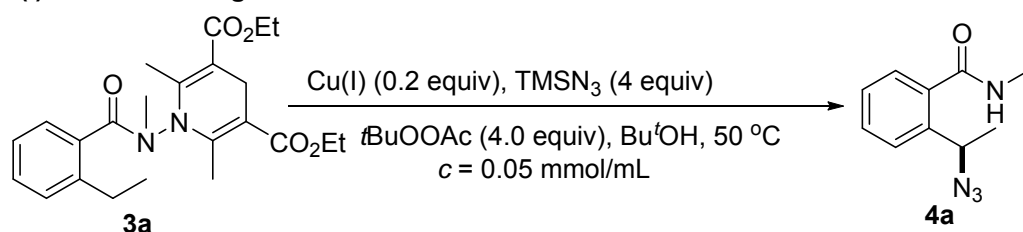

| Entry          | Cu(I)                                       | Yield/% <sup>b</sup> |
|----------------|---------------------------------------------|----------------------|
| 1              | CuOAc                                       | 56                   |
| 2              | $\text{CuOTf} \cdot \text{benzene}$         | 52                   |
| 3              | CuCl                                        | 44                   |
| 4              | CuI                                         | 53                   |
| 5              | CuBr                                        | 48                   |
| 6              | $\text{CuPF}_6 \cdot 4\text{CH}_3\text{CN}$ | 68                   |
| 7 <sup>c</sup> | $\text{CuPF}_6 \cdot 4\text{CH}_3\text{CN}$ | 88/(85) <sup>d</sup> |

[a] **3a** (0.1 mmol, 1.0 equiv),  $\text{TMSN}_3$  (4.0 equiv), Cu(I) (0.4 equiv), *t*BuOOAc (4.0 equiv) and  $\text{Bu}'\text{OH}$  (2.0 mL) at 50 °C. [b] Yield was determined by <sup>1</sup>H NMR spectroscopy with  $\text{CH}_2\text{Br}_2$  as an internal standard. [c]  $\text{TMSN}_3$  (2.0 equiv), *t*BuOOAc (2.0 equiv). [d] Yield of isolated product in parenthesis.

**Supplementary Table 4: Copper-catalyzed oxidative  $\delta$ -trifluoromethylation of 2-ethylbenzohydrazide **3a**: metal salts screening.<sup>a</sup>**

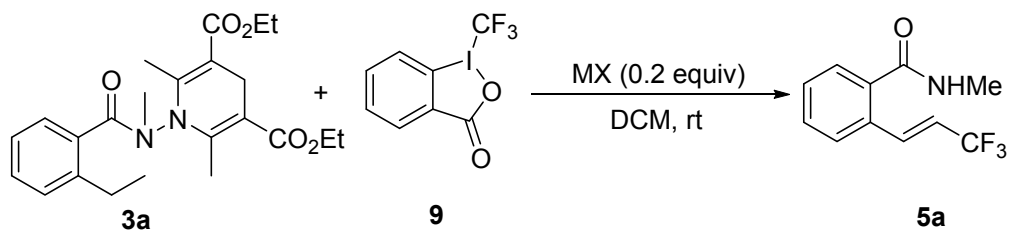

| Entry    | Metal salts          | Yield/% <sup>b</sup> |
|----------|----------------------|----------------------|
| 1        | CuF <sub>2</sub>     | trace                |
| 2        | Cu(OTf) <sub>2</sub> | trace                |
| 3        | Cu(OAc) <sub>2</sub> | trace                |
| 4        | CuI                  | 61                   |
| 5        | CuBr                 | 54                   |
| <b>6</b> | <b>CuCl</b>          | <b>64</b>            |
| 7        | CuOAc                | 22                   |
| 8        | CuOTf•benzene        | 18                   |
| 9        | FeCl <sub>2</sub>    | trace                |
| 10       | FeBr <sub>2</sub>    | trace                |
| 11       | Fe(OTf) <sub>2</sub> | trace                |
| 12       | FeCl <sub>3</sub>    | trace                |
| 13       | Fe(OTf) <sub>3</sub> | trace                |

[a] **3a** (0.1 mmol, 1.0 equiv), Togni's reagent **9** (3.0 equiv), MX (0.2 equiv), and DCM (1.0 mL) at rt. [b] Yield was determined by <sup>1</sup>H NMR spectroscopy with DMAP as an internal standard.

**Supplementary Table 5: Copper-catalyzed oxidative  $\delta$ -trifluoromethylation of 2-ethylbenzohydrazide **3a**: bases screening.<sup>a</sup>**

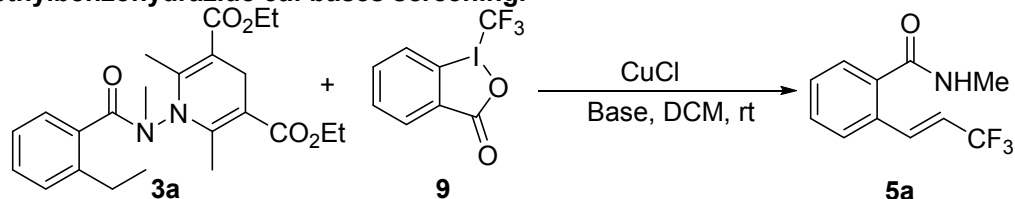

| Entry                | Base                                | Yield/% <sup>b</sup>      |
|----------------------|-------------------------------------|---------------------------|
| 1                    | ---                                 | 64                        |
| 2                    | NaHCO <sub>3</sub>                  | 61                        |
| 3                    | Na <sub>2</sub> CO <sub>3</sub>     | 68                        |
| 4                    | K <sub>2</sub> CO <sub>3</sub>      | 24                        |
| 5                    | Na <sub>3</sub> PO <sub>4</sub>     | 50                        |
| 6                    | Na <sub>2</sub> HPO <sub>4</sub>    | 54                        |
| 7                    | DABCO                               | 36                        |
| <b>8<sup>c</sup></b> | <b>Na<sub>2</sub>CO<sub>3</sub></b> | <b>74(72)<sup>d</sup></b> |
| 9 <sup>f</sup>       | Na <sub>2</sub> CO <sub>3</sub>     | 54                        |

[a] **3a** (0.1 mmol, 1.0 equiv), Togni's reagent **9** (3.0 equiv), CuCl (0.2 equiv mmol), base (3.0 equiv), and DCM (1.0 mL) at rt. [b] Yield was determined by <sup>1</sup>H NMR spectroscopy with DMAP as an internal standard. [c] CuCl (0.4 equiv) [d] Yield of isolated product in parenthesis. [f] CuCl (0.06 mmol).

**Supplementary Table 6: Copper-catalyzed oxidative  $\delta$ -trifluoromethylation of 2-ethylbenzohydrazide **3a**: solvents screening.<sup>a</sup>**

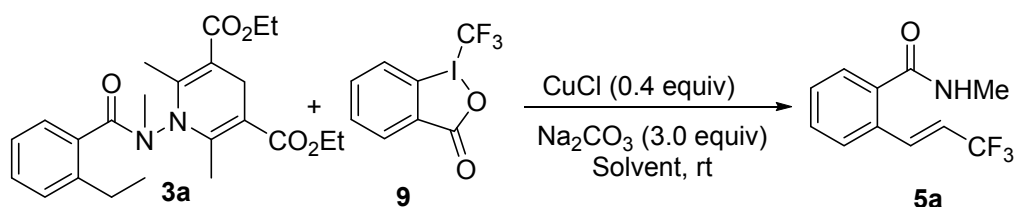

| Entry    | Solvent            | Yield/% <sup>b</sup>       |
|----------|--------------------|----------------------------|
| 1        | Benzene            | trace                      |
| 2        | PhCl               | trace                      |
| 3        | PhCF <sub>3</sub>  | trace                      |
| 4        | CH <sub>3</sub> CN | trace                      |
| 5        | DCE                | 61                         |
| 6        | 1,4-Dioxane        | 12                         |
| <b>7</b> | <b>DCM</b>         | <b>74/(72)<sup>c</sup></b> |

[a] **3a** (0.1 mmol, 1.0 equiv), Togni's reagent **9** (3.0 equiv), CuCl (0.4 equiv), Na<sub>2</sub>CO<sub>3</sub> (3.0 equiv), and solvent (1.0 mL) at rt. [b] Yield was determined by <sup>1</sup>H NMR spectroscopy with DMAP as an internal standard. [d] Yield of isolated product in parenthesis.

## Supplementary Methods

### General Information.

#### General Analytical Information.

NMR spectra were recorded on a Bruker AvanceIII-400, Bruker Avance-400 or Bruker DPX-400 spectrometer at room temperature,  $^1\text{H}$  frequency is at 400.13 MHz,  $^{13}\text{C}$  frequency is at 100.62 MHz. Chemical shifts ( $\delta$ ) were reported in parts per million (ppm) relative to residual solvent peaks rounded to the nearest 0.01 for proton and 0.1 for carbon (*ref: CHCl<sub>3</sub> [ $^1\text{H}$ : 7.26,  $^{13}\text{C}$ : 77.16]*). Coupling constants ( $J$ ) were reported in Hz to the nearest 0.1 Hz. Peak multiplicity was indicated as follows s (singlet), d (doublet), t (triplet), q (quartet), m (multiplet) and br (broad). Attribution of peaks was done using the multiplicities and integrals of the peaks.

IR spectra were recorded in a Jasco FT/IR-4100 spectrometer outfitted with a PIKE technology MIRacle<sup>TM</sup> ATR accessory as neat films compressed onto a Zinc Selenide window. The spectra were reported in  $\text{cm}^{-1}$ .

The accurate masses were measured by the mass spectrometry service of the EPFL by ESI-TOF using a QTOF Ultima from Waters or APPI-FT-ICR using a linear ion trap Fourier transform ion cyclotron resonance mass spectrometer from Thermo Scientific.

Melting points were measured using a Stuart SMP30

### Materials and Methods.

Unless otherwise stated, starting materials were purchased from Aldrich and/or Fluka. Solvents were purchased in HPLC quality, degassed by purging thoroughly with nitrogen and dried over activated molecular sieves of appropriate size. Alternatively, they were purged with argon and passed through alumina columns in a solvent purification system (Innovative Technology). Conversion was monitored by thin layer chromatography (TLC) using Merck TLC silica gel 60 F254. Compounds were visualized by UV light at 254 nm and by dipping the plates in an ethanolic vanillin/sulfuric acid solution or an



aqueous potassium permanganate solution followed by heating. Flash column chromatography was performed over silica gel (230–400 mesh).

### General procedure

The benzohydrazides **3** were prepared following Studer's procedure.<sup>1</sup>

### General procedure for the Copper-catalyzed $\gamma$ -azidation of 2-alkyl benzohydrazides **3**

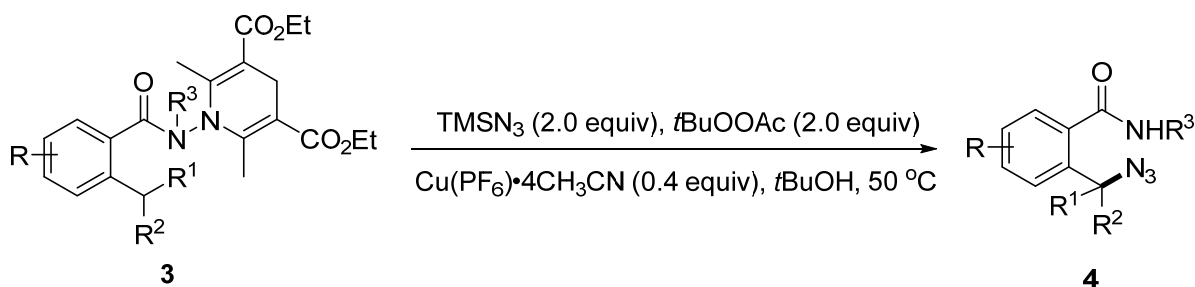

A screw cap tube was charged with Cu(PF<sub>6</sub>)•4CH<sub>3</sub>CN (14.9 mg, 0.04 mmol, 0.4 equiv), substrate **3** (0.1 mmol, 1.0 equiv), TMSN<sub>3</sub> (26.5  $\mu$ L, 0.2 mmol, 2.0 equiv) and *t*BuOH (2.0 mL). The mixture was stirred at 50 °C for 2 minutes, then *t*BuOOAc (32.2  $\mu$ L, 0.2 mmol, 2.0 equiv) was added to the above mixture. After being stirred for 2 hours at 50 °C under N<sub>2</sub> atmosphere, the reaction mixture was quenched with water, extracted with EtOAc. The organic extracts were washed with brine, dried over Na<sub>2</sub>SO<sub>4</sub>. The solvent was removed under reduced pressure. The residue was purified by flash chromatography (SiO<sub>2</sub>, eluent: PE/EtOAc = 2/1) to give **4**.

### Characterization of compounds **4**

#### 2-(1-azidoethyl)-*N*-methylbenzamide (**4a**)

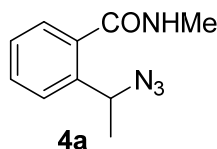

The crude product was purified by flash column chromatography on silica gel to afford **4a** (17.4 mg, 85% yield) as an oil.

**<sup>1</sup>H NMR** (400 MHz, CDCl<sub>3</sub>) δ 7.44 (d, *J* = 7.8 Hz, 1H), 7.38 (t, *J* = 7.5 Hz, 1H), 7.29 (d, *J* = 7.7 Hz, 1H), 7.25 – 7.17 (m, 1H), 6.17 (s, 1H), 5.08 (q, *J* = 6.8 Hz, 1H), 2.87 (d, *J* = 4.9 Hz, 3H), 1.46 (d, *J* = 6.8 Hz, 3H).

**<sup>13</sup>C NMR** (101 MHz, CDCl<sub>3</sub>) δ 169.9, 139.7, 135.4, 130.7, 127.9, 127.0, 126.8, 57.4, 26.8, 21.7.

**IR (neat) cm<sup>-1</sup> ν:** 3294 (w), 2976 (w), 2104 (s), 1721 (w), 1635 (s), 1619 (m), 1538 (s), 1410 (m), 1305 (m), 1245 (s), 1065 (m), 760 (s), 697 (m).

**HRMS** (ESI) *m/z*: [M + Na]<sup>+</sup> Calcd for C<sub>10</sub>H<sub>12</sub>N<sub>4</sub>NaO<sup>+</sup> 227.0903; Found 227.0906.

### 2-(1-azidoethyl)-*N*,4-dimethylbenzamide (**4b**)

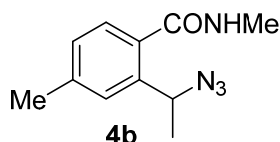

The crude product was purified by flash column chromatography on silica gel to afford **4b** (18.5 mg, 85% yield) as an oil.

**<sup>1</sup>H NMR** (400 MHz, CDCl<sub>3</sub>) δ 7.24 (s, 1H), 7.20 (d, *J* = 7.9 Hz, 1H), 7.03 (d, *J* = 7.1 Hz, 1H), 6.01 (s, 1H), 5.12 (q, *J* = 6.7 Hz, 1H), 2.89 (d, *J* = 4.9 Hz, 3H), 2.31 (s, 3H), 1.47 (d, *J* = 6.7 Hz, 3H).

**<sup>13</sup>C NMR** (101 MHz, CDCl<sub>3</sub>) δ 170.0, 141.0, 139.9, 132.5, 128.6, 127.4, 127.1, 57.4, 26.8, 21.8, 21.6.

**IR (neat) cm<sup>-1</sup> ν:** 3262 (w), 2979 (w), 2112 (s), 2076 (m), 1625 (s), 1562 (s), 1452 (w), 1322 (m), 1249 (s), 1146 (m), 1071 (w), 836 (m), 720 (s).

**HRMS** (ESI) *m/z*: [M + Na]<sup>+</sup> Calcd for C<sub>11</sub>H<sub>14</sub>N<sub>4</sub>NaO<sup>+</sup> 241.1060; Found 241.1059.

### 3-(1-azidoethyl)-*N*-methyl-[1,1'-biphenyl]-4-carboxamide (**4c**)

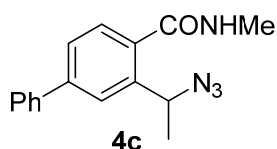

The crude product was purified by flash column chromatography on silica gel to afford **4c** (25.8 mg, 92% yield) as an oil.

**<sup>1</sup>H NMR** (400 MHz, CDCl<sub>3</sub>)  $\delta$  7.73 (d,  $J$  = 1.8 Hz, 1H), 7.61 – 7.56 (m, 2H), 7.52 – 7.42 (m, 4H), 7.41 – 7.36 (m, 1H), 6.25 (q,  $J$  = 5.3 Hz, 1H), 5.26 (q,  $J$  = 6.7 Hz, 1H), 2.98 (d,  $J$  = 4.9 Hz, 3H), 1.59 (d,  $J$  = 6.8 Hz, 3H).

**<sup>13</sup>C NMR** (101 MHz, CDCl<sub>3</sub>)  $\delta$  169.7, 143.6, 140.5, 140.0, 134.0, 129.0, 128.1, 127.7, 127.3, 126.5, 125.6, 57.5, 26.9, 21.8.

**IR (neat) cm<sup>-1</sup> v:** 3269 (w), 2936 (w), 2100 (m), 1624 (m), 1562 (m), 1481 (w), 1450 (w), 1409 (w), 1307 (m), 1241 (m), 1069 (w), 838 (w), 761 (s), 696 (s).

**HRMS** (ESI)  $m/z$ : [M + Na]<sup>+</sup> Calcd for C<sub>16</sub>H<sub>16</sub>N<sub>4</sub>NaO<sup>+</sup> 303.1216; Found 303.1216.

#### 2-(1-azidoethyl)-4-methoxy-*N*-methylbenzamide (**4d**)

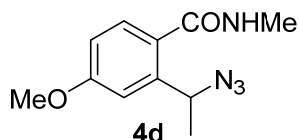

The crude product was purified by flash column chromatography on silica gel to afford **4d** (19.8 mg, 85% yield) as a white solid.

**MP:** 74 – 75 °C

**<sup>1</sup>H NMR** (400 MHz, CDCl<sub>3</sub>)  $\delta$  7.35 (d,  $J$  = 8.5 Hz, 1H), 7.03 (d,  $J$  = 2.3 Hz, 1H), 6.80 (dd,  $J$  = 8.4, 2.4 Hz, 1H), 5.99 (s, 1H), 5.27 (q,  $J$  = 6.7 Hz, 1H), 3.84 (s, 3H), 2.96 (d,  $J$  = 4.8 Hz, 3H), 1.54 (d,  $J$  = 6.8 Hz, 3H).

**<sup>13</sup>C NMR** (101 MHz, CDCl<sub>3</sub>)  $\delta$  169.6, 161.4, 142.4, 128.8, 127.6, 113.0, 112.5, 57.4, 55.6, 26.9, 21.9.

**IR (neat) cm<sup>-1</sup> v:** 3259 (w), 2987 (w), 2110 (m), 2069 (w), 1631 (m), 1609 (m), 1570 (m), 1492 (w), 1409 (m), 1284 (s), 1229 (s), 1169 (w), 1066 (m), 1038 (s), 894 (w), 824 (m), 707 (m).

**HRMS** (ESI)  $m/z$ :  $[M + Na]^+$  Calcd for  $C_{11}H_{14}N_4NaO_2^+$  257.1009; Found 257.1010.

**2-(1-azidoethyl)-4-fluoro-*N*-methylbenzamide (4e)**

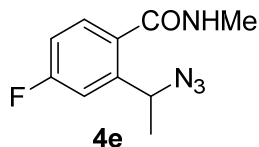

The crude product was purified by flash column chromatography on silica gel to afford **4e** (20.2 mg, 90% yield) as an oil.

**<sup>1</sup>H NMR** (400 MHz, CDCl<sub>3</sub>)  $\delta$  7.36 (dd,  $J = 8.5, 5.6$  Hz, 1H), 7.20 (dd,  $J = 9.9, 2.4$  Hz, 1H), 6.96 (td,  $J = 8.1, 2.3$  Hz, 1H), 6.20 (s, 1H), 5.17 (q,  $J = 6.8$  Hz, 1H), 2.93 (d,  $J = 4.9$  Hz, 3H), 1.51 (d,  $J = 6.8$  Hz, 3H).

**<sup>13</sup>C NMR** (101 MHz, CDCl<sub>3</sub>)  $\delta$  169.0, 163.9 (d,  $J = 250.8$  Hz), 143.2 (d,  $J = 7.4$  Hz), 131.3 (d,  $J = 3.4$  Hz), 129.2 (d,  $J = 8.6$  Hz), 114.8 (d,  $J = 21.7$  Hz), 114.1 (d,  $J = 22.8$  Hz), 57.0 (d,  $^4J = 1.4$  Hz), 26.9, 21.7.

**IR (neat)  $cm^{-1}$  v:** 3286 (w), 2935 (w), 2104 (s), 2091 (s), 1635 (s), 1542 (s), 1447 (m), 1409 (m), 1308 (m), 1259 (s), 1215 (m), 1127 (m), 1058 (w), 853 (w), 800 (m), 762 (m), 702 (s).

**HRMS** (ESI)  $m/z$ :  $[M + Na]^+$  Calcd for  $C_{10}H_{11}FN_4NaO^+$  245.0809; Found 245.0811.

**2-(1-azidoethyl)-4-bromo-*N*-methylbenzamide (4f)**

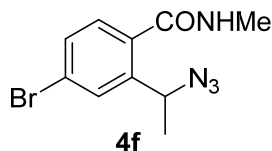

The crude product was purified by flash column chromatography on silica gel to afford **4f** (23.3 mg, 83% yield) as a white solid.

**MP:** 107 – 108 °C

**<sup>1</sup>H NMR** (400 MHz, CDCl<sub>3</sub>) δ 7.63 (s, 1H), 7.41 (dd, *J* = 8.1, 1.9 Hz, 1H), 7.21 (d, *J* = 8.1 Hz, 1H), 6.21 (s, 1H), 5.12 (q, *J* = 6.8 Hz, 1H), 2.93 (d, *J* = 4.8 Hz, 3H), 1.51 (d, *J* = 6.7 Hz, 3H).

**<sup>13</sup>C NMR** (101 MHz, CDCl<sub>3</sub>) δ 169.0, 142.2, 134.0, 131.0, 130.2, 128.6, 125.0, 57.0, 26.9, 21.7.

**IR (neat) cm<sup>-1</sup> ν:** 3249 (w), 3015 (w), 2358 (m), 2329 (m), 2141 (m), 1797 (s), 1610 (s), 1438 (s), 1225 (s), 1101 (s), 797 (s).

**HRMS** (ESI) *m/z*: [M + H]<sup>+</sup> Calcd for C<sub>10</sub>H<sub>12</sub>BrN<sub>4</sub>O<sup>+</sup> 283.0189; Found 283.0188.

#### 2-(1-azidoethyl)-*N*,3-dimethylbenzamide (4g)

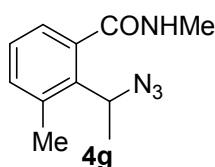

The crude product was purified by flash column chromatography on silica gel to afford **4g** (17.6 mg, 86% yield) as an oil.

**<sup>1</sup>H NMR** (400 MHz, CDCl<sub>3</sub>) δ 7.60 – 7.11 (m, 3H), 6.06 (s, 1H), 5.28 (q, *J* = 7.0 Hz, 1H), 3.11 (d, *J* = 4.9 Hz, 3H), 2.60 (s, 3H), 1.74 (d, *J* = 7.0 Hz, 3H).

**<sup>13</sup>C NMR** (101 MHz, CDCl<sub>3</sub>) δ 171.3, 137.4, 137.2, 136.4, 133.3, 127.7, 125.1, 58.4, 26.9, 20.4, 19.9.

**IR (neat) cm<sup>-1</sup> ν:** 3285 (w), 2972 (w), 2902 (w), 2113 (s), 1637 (s), 1538 (m), 1454 (m), 1409 (m), 1308 (m), 1244 (s), 1197 (m), 1076 (m), 1057 (s), 807 (s), 746 (m), 666 (m).

**HRMS** (ESI) *m/z*: [M + Na]<sup>+</sup> Calcd for C<sub>11</sub>H<sub>14</sub>N<sub>4</sub>NaO<sup>+</sup> 241.1060; Found 241.1063.

#### 2-(1-azidoethyl)-3-fluoro-*N*-methylbenzamide (4h)

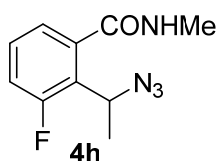

The crude product was purified by flash column chromatography on silica gel to afford **4h** (17.4 mg, 78% yield) as an oil.

**<sup>1</sup>H NMR** (400 MHz, CDCl<sub>3</sub>)  $\delta$  7.40 – 7.27 (m, 1H), 7.19 – 7.01 (m, 2H), 6.13 (s, 1H), 5.07 (qd,  $J = 6.9$ , 1.4 Hz, 1H), 2.99 (d,  $J = 4.9$  Hz, 3H), 1.68 (dd,  $J = 7.0$ , 1.2 Hz, 3H).

**<sup>13</sup>C NMR** (101 MHz, CDCl<sub>3</sub>)  $\delta$  169.0 (d,  $J = 2.9$  Hz), 161.6 (d,  $J = 250.9$  Hz), 138.3 (d,  $J = 4.0$  Hz), 129.8 (d,  $J = 9.2$  Hz), 126.4 (d,  $J = 13.2$  Hz), 123.0 (d,  $J = 3.6$  Hz), 118.0 (d,  $J = 23.3$  Hz), 55.1, 26.9, 19.4 (d,  $^4J = 3.6$  Hz).

**IR (neat) cm<sup>-1</sup> v:** 3282 (w), 2091 (s), 1542 (s), 1447 (w), 1409 (m), 1259 (s), 1215 (w), 1127 (w), 1058 (w), 1008 (w), 853 (w), 762 (m), 705 (s).

**HRMS** (ESI)  $m/z$ : [M + Na]<sup>+</sup> Calcd for C<sub>10</sub>H<sub>11</sub>FN<sub>4</sub>NaO<sup>+</sup> 245.0809; Found 245.0813.

#### 2-(1-azidoethyl)-3-bromo-*N*-methylbenzamide (**4i**)

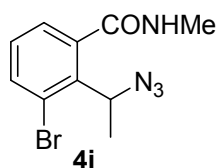

The crude product was purified by flash column chromatography on silica gel to afford **4i** (21.4 mg, 76% yield) as an oil, which was contaminated by the amide **4i'**.

**<sup>1</sup>H NMR** (400 MHz, CDCl<sub>3</sub>)  $\delta$  7.55 (dd,  $J = 8.0$ , 1.2 Hz, 1H), 7.21 (d,  $J = 8.0$ , 1.2 Hz, 1H), 7.07 (t,  $J = 7.8$  Hz, 1H), 5.92 (s, 1H), 5.21 (q,  $J = 6.9$  Hz, 1H), 2.93 (d,  $J = 4.9$  Hz, 3H), 1.63 (d,  $J = 6.9$  Hz, 3H).

**<sup>13</sup>C NMR** (101 MHz, CDCl<sub>3</sub>)  $\delta$  169.9, 138.7, 137.5, 134.9, 129.0, 127.2, 123.7, 59.8, 26.9, 19.2.

**IR (neat) cm<sup>-1</sup> v:** 3289 (w), 2970 (w), 2159 (w), 2114 (s), 1629 (s), 1559 (m), 1553 (s), 1470 (m), 1407 (m), 1316 (s), 1255 (s), 1064 (s), 1011 (m), 806 (s), 716 (s).

**HRMS** (ESI)  $m/z$ : [M + Na]<sup>+</sup> Calcd for C<sub>10</sub>H<sub>11</sub>BrN<sub>4</sub>NaO<sup>+</sup> 305.0008; Found 305.0010.

#### 3-bromo-2-ethyl-*N*-methylbenzamide (**4i'**)

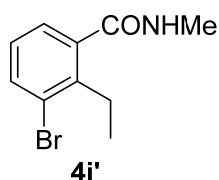

**<sup>1</sup>H NMR** (400 MHz, CDCl<sub>3</sub>)  $\delta$  7.5 (dd,  $J$  = 8.0, 1.3 Hz, 1H), 7.14 (dt,  $J$  = 7.8, 1.4 Hz, 1H), 6.97 (t,  $J$  = 7.8 Hz, 1H), 5.78 (s, 1H), 2.90 (d,  $J$  = 7.6 Hz, 3H), 2.79 (q,  $J$  = 7.5 Hz, 2H), 1.14 (t,  $J$  = 7.5 Hz, 3H).

**<sup>13</sup>C NMR** (101 MHz, CDCl<sub>3</sub>)  $\delta$  170.1, 141.2, 138.6, 134.4, 129.9, 125.8, 27.0, 26.7, 14.6.

### 2-(1-azidoethyl)-N,5-dimethylbenzamide (**4j**)

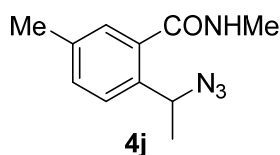

The crude product was purified by flash column chromatography on silica gel to afford **4j** (18.9 mg, 86% yield) as an oil.

**<sup>1</sup>H NMR** (400 MHz, CDCl<sub>3</sub>)  $\delta$  7.40 (d,  $J$  = 7.9 Hz, 1H), 7.28 (d,  $J$  = 7.6 Hz, 1H), 7.21 (s, 1H), 6.15 (s, 1H), 5.11 (q,  $J$  = 6.8 Hz, 1H), 2.97 (d,  $J$  = 4.8 Hz, 3H), 2.35 (s, 3H), 1.54 (d,  $J$  = 6.7 Hz, 3H).

**<sup>13</sup>C NMR** (101 MHz, CDCl<sub>3</sub>)  $\delta$  170.0, 137.9, 136.5, 135.5, 131.4, 127.7, 126.7, 57.3, 26.8, 21.5, 21.0.

**IR (neat) cm<sup>-1</sup>**: 3265 (w), 2978 (w), 2111 (s), 2073 (m), 1625 (s), 1561 (s), 1452 (m), 1409 (m), 1319 (s), 1249 (s), 1146 (m), 1071 (m), 836 (s), 719 (s).

**HRMS** (ESI)  $m/z$ : [M + H]<sup>+</sup> Calcd for C<sub>11</sub>H<sub>15</sub>N<sub>4</sub>O<sup>+</sup> 219.1240; Found 219.1236.

### 2-(1-azidoethyl)-5-methoxy-N-methylbenzamide (**4k**)

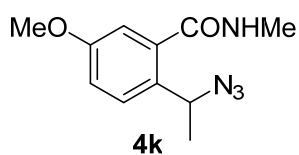

The crude product was purified by flash column chromatography on silica gel to afford **4k** (16.8 mg, 72% yield) as an oil and **4k'** (5.6 mg, 21% yield) as an oil.

**<sup>1</sup>H NMR** (400 MHz, CDCl<sub>3</sub>)  $\delta$  7.41 (d,  $J$  = 8.7 Hz, 1H), 6.97 (dd,  $J$  = 8.7, 2.6 Hz, 1H), 6.90 (d,  $J$  = 2.5 Hz, 1H), 6.11 (s, 1H), 5.03 (q,  $J$  = 6.8 Hz, 1H), 3.80 (s, 3H), 2.97 (d,  $J$  = 5.1 Hz, 3H), 1.52 (d,  $J$  = 6.8 Hz, 3H).

**<sup>13</sup>C NMR** (101 MHz, CDCl<sub>3</sub>)  $\delta$  169.6, 159.0, 136.9, 131.2, 128.2, 116.0, 112.7, 57.1, 55.6, 26.9, 21.4.

**IR (neat) cm<sup>-1</sup>  $\nu$** : 3288 (w), 2936 (w), 2099 (m), 1639 (m), 1605 (m), 1541 (m), 1493 (w), 1410 (w), 1293 (m), 1237 (s), 1116 (w), 1036 (m), 826 (m).

**HRMS** (ESI)  $m/z$ : [M + Na]<sup>+</sup> Calcd for C<sub>11</sub>H<sub>14</sub>N<sub>4</sub>NaO<sub>2</sub><sup>+</sup> 257.1009; Found 257.1009.

#### 2-(1-(*tert*-butoxy)ethyl)-5-methoxy-*N*-methylbenzamide (**4k'**)

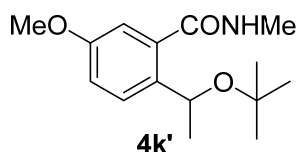

**<sup>1</sup>H NMR** (400 MHz, CDCl<sub>3</sub>)  $\delta$  7.39 (d,  $J$  = 8.6 Hz, 1H), 7.19 (s, 1H), 7.05 (s, 1H), 6.90 (dd,  $J$  = 8.6, 2.6 Hz, 1H), 4.96 (q,  $J$  = 6.6 Hz, 1H), 3.79 (s, 3H), 2.96 (d,  $J$  = 4.8 Hz, 3H), 1.35 (d,  $J$  = 6.5 Hz, 3H), 1.15 (s, 9H).

**<sup>13</sup>C NMR** (101 MHz, CDCl<sub>3</sub>)  $\delta$  170.1, 158.3, 137.0, 135.3, 129.6, 116.0, 113.6, 74.9, 68.7, 55.5, 28.6, 26.7, 25.5.

**IR (neat) cm<sup>-1</sup>  $\nu$** : 3308 (w), 2974 (w), 1631 (m), 1601 (m), 1556 (m), 1469 (w), 1367 (w), 1327 (w), 1275 (w), 1234 (s), 1195 (w), 1076 (s), 1039 (m), 1015 (m), 958 (w), 850 (m), 703 (m).

**HRMS** (ESI)  $m/z$ : [M + H]<sup>+</sup> Calcd for C<sub>15</sub>H<sub>24</sub>NO<sub>3</sub><sup>+</sup> 266.1751; Found 266.1747.

#### 2-(1-azidoethyl)-5-chloro-*N*-methylbenzamide (**4l**)



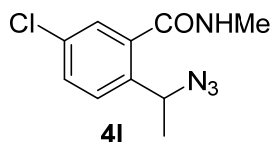

The crude product was purified by flash column chromatography on silica gel to afford **4l** (22.3 mg, 93% yield) as an oil.

**<sup>1</sup>H NMR** (400 MHz, CDCl<sub>3</sub>)  $\delta$  7.43 (d,  $J$  = 8.4 Hz, 1H), 7.40 (dd,  $J$  = 8.4, 2.0 Hz, 1H), 7.33 (d,  $J$  = 2.0 Hz, 1H), 6.35 (s, 1H), 5.07 (q,  $J$  = 6.7 Hz, 1H), 2.92 (d,  $J$  = 4.9 Hz, 3H), 1.49 (d,  $J$  = 6.8 Hz, 3H).

**<sup>13</sup>C NMR** (101 MHz, CDCl<sub>3</sub>)  $\delta$  168.5, 138.3, 136.8, 133.6, 130.7, 128.4, 127.2, 56.9, 26.8, 21.6.

**IR (neat) cm<sup>-1</sup> v:** 3238 (w), 3088 (w), 2976 (w), 2113 (s), 2079 (s), 1624 (s), 1619 (m), 1559 (s), 1412 (m), 1311 (s), 1242 (s), 1154 (m), 1099 (m), 1064 (m), 1007 (w), 881 (m), 827 (s), 720 (s), 687 (m).

**HRMS** (ESI)  $m/z$ : [M + H]<sup>+</sup> Calcd for C<sub>10</sub>H<sub>12</sub>ClN<sub>4</sub>O<sup>+</sup> 239.0772; Found 239.0768.

#### **2-(1-azidoethyl)-5-bromo-N-methylbenzamide (4m)**

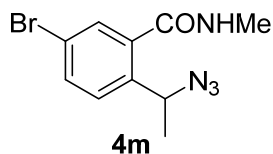

The crude product was purified by flash column chromatography on silica gel to afford **4m** (23.4 mg, 93% yield) as a white solid.

**MP:** 89 – 90 °C

**<sup>1</sup>H NMR** (400 MHz, CDCl<sub>3</sub>)  $\delta$  7.56 (dd,  $J$  = 8.4, 1.9 Hz, 1H), 7.49 (d,  $J$  = 1.9 Hz, 1H), 7.37 (d,  $J$  = 8.4 Hz, 1H), 6.26 (s, 1H), 5.07 (q,  $J$  = 6.8 Hz, 1H), 2.94 (d,  $J$  = 4.8 Hz, 3H), 1.50 (d,  $J$  = 6.7 Hz, 3H).

**<sup>13</sup>C NMR** (101 MHz, CDCl<sub>3</sub>)  $\delta$  168.3, 138.9, 137.1, 133.7, 130.0, 128.7, 121.6, 57.0, 26.9, 21.6.

**IR (neat)  $\text{cm}^{-1}$   $\nu$ :** 3238 (w), 2981 (w), 2113 (s), 2080 (s), 1625 (s), 1568 (m), 1557 (s), 1409 (m), 1311 (s), 1243 (s), 1153 (m), 1088 (m), 1062 (s), 1005 (m), 861 (m), 824 (s), 718 (s), 680 (s).

**HRMS (ESI)  $m/z$ :**  $[\text{M} + \text{H}]^+$  Calcd for  $\text{C}_{10}\text{H}_{12}\text{BrN}_4\text{O}^+$  283.0189; Found 283.0187.

### 3-(1-azidoethyl)-*N*-methyl-2-naphthamide (4n)

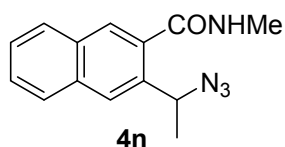

The crude product was purified by flash column chromatography on silica gel to afford **4n** (20.7 mg, 82% yield) as a white solid.

**MP:** 106-107 °C

**$^1\text{H}$  NMR** (400 MHz,  $\text{CDCl}_3$ )  $\delta$  7.92 (s, 1H), 7.86 (s, 1H), 7.84 (d,  $J = 8.0$  Hz, 1H), 7.78 (d,  $J = 8.0$  Hz, 1H), 7.58 – 7.45 (m, 2H), 6.32 (s, 1H), 5.32 (q,  $J = 6.7$  Hz, 1H), 3.01 (d,  $J = 4.9$  Hz, 3H), 1.63 (d,  $J = 6.8$  Hz, 3H).

**$^{13}\text{C}$  NMR** (101 MHz,  $\text{CDCl}_3$ )  $\delta$  170.1, 136.6, 133.8, 133.6, 132.0, 128.1, 128.0, 127.7, 127.3, 127.1, 126.1, 57.4, 27.0, 21.5.

**IR (neat)  $\text{cm}^{-1}$   $\nu$ :** 3269 (w), 2972 (w), 2093 (s), 1627 (s), 1552 (m), 1457 (w), 1409 (m), 1313 (m), 1245 (m), 1161 (w), 1109 (w), 1053 (w), 1012 (w), 891 (m), 845 (w), 746 (s), 721 (s).

**HRMS (ESI)  $m/z$ :**  $[\text{M} + \text{Na}]^+$  Calcd for  $\text{C}_{14}\text{H}_{14}\text{N}_4\text{NaO}^+$  277.1060; Found 277.1067.

### 1-(1-azidoethyl)-*N*-methyl-2-naphthamide (4o)

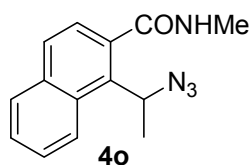

The crude product was purified by flash column chromatography on silica gel to afford **4o** (21.5 mg, 84% yield) as an oil.

**<sup>1</sup>H NMR** (400 MHz, CDCl<sub>3</sub>) δ 8.40 (d, *J* = 8.5 Hz, 1H), 7.75 (dd, *J* = 8.1, 1.6 Hz, 1H), 7.65 (d, *J* = 8.1 Hz, 1H), 7.52 – 7.41 (m, 2H), 7.23 (d, *J* = 8.4 Hz, 1H), 6.05 (s, 1H), 5.48 (q, *J* = 7.0 Hz, 1H), 2.92 (d, *J* = 4.9 Hz, 3H), 1.66 (d, *J* = 7.0 Hz, 3H).

**<sup>13</sup>C NMR** (101 MHz, CDCl<sub>3</sub>) δ 170.9, 134.6, 134.4, 134.2, 130.3, 129.2, 129.1, 126.8, 126.7, 125.9, 123.4, 58.9, 26.9, 21.4.

**IR (neat) cm<sup>-1</sup> v:** 3259 (w), 2987 (w), 2110 (m), 2069 (w), 1609 (m), 1554 (w), 1492 (w), 1409 (m), 1284 (s), 1230 (s), 1066 (m), 1003 (w), 824 (m), 692 (w).

**HRMS** (ESI) *m/z*: [M + Na]<sup>+</sup> Calcd for C<sub>14</sub>H<sub>14</sub>N<sub>4</sub>NaO<sup>+</sup> 277.1060; Found 277.1058.

#### 2-(1-azidoethyl)-*N*-ethylbenzamide (**4p**)

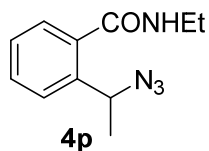

The crude product was purified by flash column chromatography on silica gel to afford **4p** (16.5 mg, 75% yield) as an oil.

**<sup>1</sup>H NMR** (400 MHz, CDCl<sub>3</sub>) δ 7.46 (d, *J* = 7.8 Hz, 1H), 7.43 – 7.38 (m, 1H), 7.33 (d, *J* = 7.5 Hz, 1H), 7.26 (t, *J* = 7.4 Hz, 1H), 5.88 (s, 1H), 5.10 (q, *J* = 6.7 Hz, 1H), 3.46-3.38 (m, 2H), 1.50 (d, *J* = 6.7 Hz, 3H), 1.19 (t, *J* = 7.3 Hz, 3H).

**<sup>13</sup>C NMR** (101 MHz, CDCl<sub>3</sub>) δ 169.2, 139.6, 135.8, 130.7, 128.0, 127.0, 126.9, 57.5, 35.1, 21.6, 15.0.

**IR (neat) cm<sup>-1</sup> v:** 3281 (w), 2976 (w), 2090 (s), 1637 (s), 1535 (s), 1448 (m), 1305 (s), 1251 (s), 1149 (w), 1066 (m), 872 (w), 760 (s), 650 (m).

**HRMS** (ESI) *m/z*: [M + Na]<sup>+</sup> Calcd for C<sub>11</sub>H<sub>14</sub>N<sub>4</sub>NaO<sup>+</sup> 241.1060; Found 241.1062.

### 2-(2-azidopropan-2-yl)-*N*-methylbenzamide (4q)

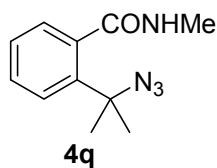

The crude product was purified by flash column chromatography on silica gel to afford **4q** (16.1 mg, 74% yield) as an oil.

$^1\text{H NMR}$  (400 MHz,  $\text{CDCl}_3$ )  $\delta$  7.46 – 7.43 (m, 1H), 7.39 (ddd,  $J = 8.1, 5.9, 2.9$  Hz, 1H), 7.34 – 7.26 (m, 2H), 5.87 (s, 1H), 3.03 (d,  $J = 4.9$  Hz, 3H), 1.78 (s, 6H).

$^{13}\text{C NMR}$  (101 MHz,  $\text{CDCl}_3$ )  $\delta$  172.4, 142.1, 136.4, 129.6, 128.6, 127.6, 126.3, 64.5, 28.6, 27.0.

**IR (neat)  $\text{cm}^{-1}$   $\nu$ :** 3275 (w), 2934 (w), 2111 (s), 1628 (s), 1549 (m), 1407 (m), 1312 (m), 1249 (s), 1149 (m), 1075 (w), 766 (s), 720 (s).

**HRMS (ESI)  $m/z$ :**  $[\text{M} + \text{Na}]^+$  Calcd for  $\text{C}_{11}\text{H}_{14}\text{N}_4\text{NaO}^+$  241.1060; Found 241.1063.

### 2-(azidomethyl)-*N*-methylbenzamide (4r)

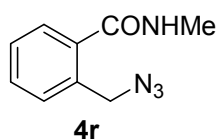

The crude product was purified by flash column chromatography on silica gel to afford **4r** (15.9 mg, 83% yield) as an oil.

$^1\text{H NMR}$  (400 MHz,  $\text{CDCl}_3$ )  $\delta$  7.49 (d,  $J = 7.6$  Hz, 1H), 7.46 – 7.42 (m, 1H), 7.41 – 7.33 (m, 2H), 6.18 (s, 1H), 4.57 (s, 2H), 2.99 (d,  $J = 4.9$  Hz, 3H).

$^{13}\text{C NMR}$  (101 MHz,  $\text{CDCl}_3$ )  $\delta$  169.5, 136.0, 134.0, 130.7, 130.2, 128.6, 127.8, 52.8, 26.9.

**IR (neat)  $\text{cm}^{-1}$   $\nu$ :** 3284 (w), 2939 (w), 2074 (m), 1628 (m), 1551 (m), 1447 (w), 1407 (w), 1319 (m), 1232 (m), 1171 (m), 878 (w), 850 (w), 755 (m), 698 (s).

**HRMS** (ESI)  $m/z$ :  $[M + Na]^+$  Calcd for  $C_9H_{10}N_4NaO^+$  213.0747; Found 213.0748.

**2-(1-azidopropyl)-*N*-methylbenzamide (4s)**

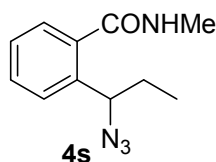

The crude product was purified by flash column chromatography on silica gel to afford **4s** (18.0 mg, 82% yield) as an oil.

**$^1H$  NMR** (400 MHz,  $CDCl_3$ )  $\delta$  7.49 – 7.41 (m, 2H), 7.39 (d,  $J = 7.0$  Hz, 1H), 7.31 (ddd,  $J = 7.7, 6.2, 2.3$  Hz, 1H), 6.05 (s, 1H), 4.92 (dd,  $J = 7.7, 6.3$  Hz, 1H), 2.97 (d,  $J = 4.9$  Hz, 3H), 1.93 – 1.78 (m, 2H), 0.96 (t,  $J = 7.3$  Hz, 3H).

**$^{13}C$  NMR** (101 MHz,  $CDCl_3$ )  $\delta$  169.9, 138.6, 136.0, 130.6, 128.0, 127.3, 127.1, 63.7, 29.3, 26.9, 11.0.

**IR** (neat)  $cm^{-1}$   $\nu$ : 3242 (w), 2966 (w), 2158 (w), 2089 (s), 1645 (m), 1624 (s), 1558 (m), 1447 (w), 1322 (m), 1242 (s), 1174 (w), 911 (w), 754 (m), 720 (s).

**HRMS** (ESI)  $m/z$ :  $[M + Na]^+$  Calcd for  $C_{11}H_{14}N_4NaO^+$  241.1060; Found 241.1064.

**2-(1-azido-3-methoxypropyl)-*N*-methylbenzamide (4t)**

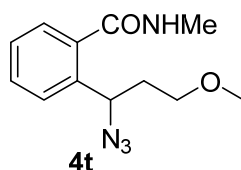

The crude product was purified by flash column chromatography on silica gel to afford **4t** (20.2 mg, 81% yield) as an oil.

**$^1H$  NMR** (400 MHz,  $CDCl_3$ )  $\delta$  7.47 – 7.43 (m, 2H), 7.40 (d,  $J = 7.7$  Hz, 1H), 7.33-7.27 (m, 1H), 6.33 (s, 1H), 5.13 (t,  $J = 7.3$  Hz, 1H), 3.47 (dt,  $J = 10.4, 6.5$  Hz, 1H), 3.40 – 3.30 (m, 1H), 3.28 (s, 3H), 2.94 (d,  $J = 5.2$  Hz, 3H), 2.05 (q,  $J = 6.6$  Hz, 2H).

$^{13}\text{C}$  NMR (101 MHz,  $\text{CDCl}_3$ )  $\delta$  169.7, 137.8, 136.1, 130.6, 128.2, 127.5, 127.3, 69.2, 59.3, 58.6, 36.0, 26.8.

IR (neat)  $\text{cm}^{-1}$   $\nu$ : 3304 (w), 2933 (w), 2878 (w), 2095 (s), 1637 (s), 1539 (m), 1410 (w), 1307 (m), 1245 (m), 1118 (s), 1012 (w), 761 (m), 670 (s).

HRMS (ESI)  $m/z$ :  $[\text{M} + \text{H}]^+$  Calcd for  $\text{C}_{12}\text{H}_{17}\text{N}_4\text{O}_2^+$  249.1346; Found 249.1341.

### 2-(1-azido-3-(benzyloxy)propyl)-*N*-methylbenzamide (**4u**)

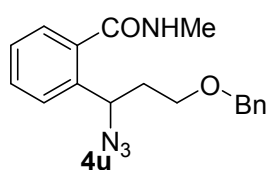

The crude product was purified by flash column chromatography on silica gel to afford **4u** (30.2 mg, 93% yield) as an oil.

$^1\text{H}$  NMR (400 MHz,  $\text{CDCl}_3$ )  $\delta$  7.50 – 7.43 (m, 2H), 7.44 – 7.38 (m, 1H), 7.36 – 7.27 (m, 6H), 6.20 (s, 1H), 5.18 (t,  $J = 7.6$  Hz, 1H), 4.45 (s, 2H), 3.60 (dt,  $J = 9.8, 6.3$  Hz, 1H), 3.49 (dt,  $J = 9.7, 6.1$  Hz, 1H), 2.83 (d,  $J = 4.8$  Hz, 3H), 2.17 – 2.11 (m, 2H).

$^{13}\text{C}$  NMR (101 MHz,  $\text{CDCl}_3$ )  $\delta$  169.6, 138.1, 137.6, 136.4, 130.6, 128.5, 128.2, 127.9, 127.8, 127.6, 127.3, 73.1, 67.0, 59.4, 35.9, 26.7.

IR (neat)  $\text{cm}^{-1}$   $\nu$ : 3291 (w), 2868 (w), 2097 (s), 1717 (w), 1637 (s), 1542 (m), 1409 (w), 1309 (m), 1274 (m), 1101 (m), 1099 (m), 757 (s), 716 (s), 699 (s).

HRMS (ESI)  $m/z$ :  $[\text{M} + \text{H}]^+$  Calcd for  $\text{C}_{18}\text{H}_{21}\text{N}_4\text{O}_2^+$  325.1659; Found 325.1652.

**General procedure for the Copper-catalyzed oxidative  $\delta$ -trifluoromethylation of 2-alkyl benzohydrazides **3****

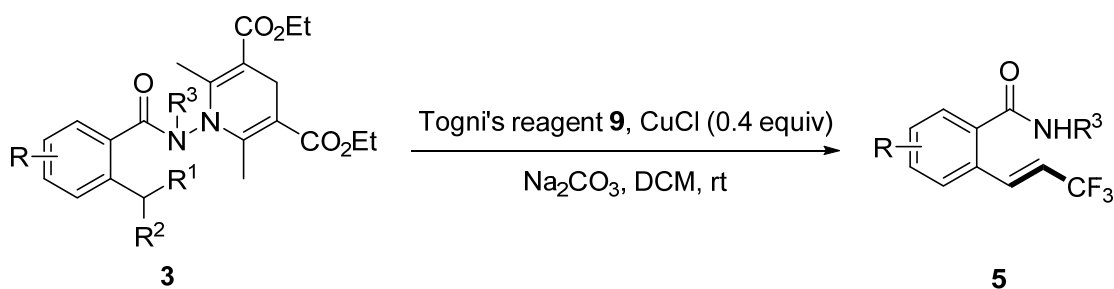

To a screw cap tube charged with CuCl (4.0 mg, 0.04 mmol) and Na<sub>2</sub>CO<sub>3</sub> (31.8 mg, 0.3 mmol, 3.0 equiv) was added a solution of Togni's reagent **9** (94.8 mg, 0.3 mmol, 3.0 equiv) in DCM (0.5 mL) under argon atmosphere. After stirring for 2 min, substrate **3** (0.1 mmol, 1.0 equiv) in DCM (0.5 mL) was added to the above mixture. After being stirred for 4 hours at room temperature under argon atmosphere, the reaction mixture was quenched with water, extracted with EtOAc. The organic extracts were washed with Na<sub>2</sub>CO<sub>3</sub> solution and brine, dried over Na<sub>2</sub>SO<sub>4</sub>. The solvent was removed under reduced pressure. The residue was purified by flash chromatography (SiO<sub>2</sub>, eluent: PE/EtOAc = 2/1) to give **5**.

### Characterization of compounds **5**

#### (*E*)-*N*-methyl-2-(3,3,3-trifluoroprop-1-en-1-yl)benzamide (**5a**)

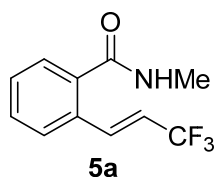

The crude product was purified by flash column chromatography on silica gel to afford **5a** (16.8 mg, 74% yield) as a white solid.

**MP:** 104 – 105 °C

**<sup>1</sup>H NMR** (400 MHz, CDCl<sub>3</sub>)  $\delta$  7.61 – 7.54 (m, 2H), 7.49 – 7.43 (m, 2H), 7.42 – 7.37 (m, 1H), 6.16 (dq,  $J = 16.1, 6.5$  Hz, 1H), 5.88 (s, 1H), 3.00 (d,  $J = 4.9$  Hz, 3H).

$^{13}\text{C}$  NMR (101 MHz,  $\text{CDCl}_3$ )  $\delta$  169.3, 136.7, 135.6 (q,  $J = 6.9$  Hz), 132.2, 130.6, 129.8, 127.6, 127.2, 123.4 (q,  $J = 269.2$  Hz), 118.2 (q,  $J = 33.8$  Hz), 27.0.

$^{19}\text{F}$  NMR (376 MHz,  $\text{CDCl}_3$ )  $\delta$  -63.46 (dd,  $J = 6.5, 2.3$  Hz).

IR (neat)  $\text{cm}^{-1}$   $\nu$ : 3285 (w), 1668 (w), 1633 (m), 1546 (m), 1417 (w), 1319 (m), 1272 (s), 1101 (s), 966 (m), 858 (w), 748 (m), 696 (m).

HRMS (ESI)  $m/z$ :  $[\text{M} + \text{H}]^+$  Calcd for  $\text{C}_{11}\text{H}_{11}\text{F}_3\text{NO}^+$  230.0787; Found 230.0788.

**(*E*)-*N*,4-dimethyl-2-(3,3,3-trifluoroprop-1-en-1-yl)benzamide (5b)**

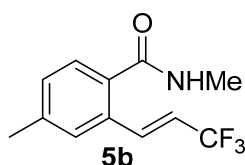

The crude product was purified by flash column chromatography on silica gel to afford **5b** (18.1 mg, 74% yield) as a white solid.

MP: 143 – 144 °C

$^1\text{H}$  NMR (400 MHz,  $\text{CDCl}_3$ )  $\delta$  7.59 (dq,  $J = 16.0, 2.3$  Hz, 1H), 7.38 – 7.33 (m, 2H), 7.18 (d,  $J = 7.8$  Hz, 1H), 6.13 (dq,  $J = 16.1, 6.5$  Hz, 1H), 5.92 (s, 1H), 2.98 (d,  $J = 4.6$  Hz, 3H), 2.38 (s, 3H).

$^{13}\text{C}$  NMR (101 MHz,  $\text{CDCl}_3$ )  $\delta$  169.4, 140.8, 135.9 (q,  $J = 6.8$  Hz), 133.8, 132.2, 130.5, 127.8, 127.6, 123.4 (q,  $J = 269.2$  Hz), 117.9 (q,  $J = 33.8$  Hz), 27.0, 21.4.

$^{19}\text{F}$  NMR (376 MHz,  $\text{CDCl}_3$ )  $\delta$  -63.39 (dd,  $J = 6.5, 2.4$  Hz).

IR (neat)  $\text{cm}^{-1}$   $\nu$ : 3281 (w), 1665 (w), 1633 (m), 1557 (w), 1408 (w), 1315 (m), 1271 (m), 1127 (m), 1099 (s), 969 (w), 833 (m), 741 (w), 703 (m).

HRMS (ESI)  $m/z$ :  $[\text{M} + \text{H}]^+$  Calcd for  $\text{C}_{12}\text{H}_{13}\text{F}_3\text{NO}^+$  244.0944; Found 244.0944.

**(*E*)-*N*-methyl-3-(3,3,3-trifluoroprop-1-en-1-yl)-[1,1'-biphenyl]-4-carboxamide (5c)**



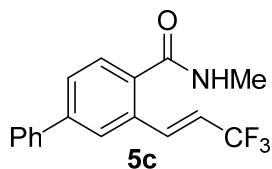

The crude product was purified by flash column chromatography on silica gel to afford **5c** (23.2 mg, 76% yield) as a white solid.

**MP:** 193 – 194 °C

**<sup>1</sup>H NMR** (400 MHz, CDCl<sub>3</sub>)  $\delta$  7.73 (d,  $J$  = 1.8 Hz, 1H), 7.67 (dq,  $J$  = 16.2, 2.3 Hz, 1H), 7.63 – 7.52 (m, 4H), 7.51 – 7.37 (m, 3H), 6.22 (dq,  $J$  = 16.1, 6.4 Hz, 1H), 5.96 (s, 1H), 3.03 (d,  $J$  = 4.9 Hz, 3H).

**<sup>13</sup>C NMR** (101 MHz, CDCl<sub>3</sub>)  $\delta$  169.1, 143.7, 139.6, 135.8 (q,  $J$  = 6.9 Hz), 135.2, 132.8, 129.2, 128.4, 128.2, 127.3, 125.9, 123.4 (q,  $J$  = 269.4 Hz), 118.5 (q,  $J$  = 34.0 Hz), 27.1.

**<sup>19</sup>F NMR** (376 MHz, CDCl<sub>3</sub>)  $\delta$  –63.41 (dd,  $J$  = 6.4, 2.3 Hz).

**IR (neat) cm<sup>-1</sup> v:** 3291 (w), 2158 (w), 1667 (w), 1629 (m), 1545 (w), 1410 (w), 1303 (m), 1269 (m), 1113 (s), 970 (w), 839 (w), 762 (s), 699 (s).

**HRMS** (ESI)  $m/z$ : [M + Na]<sup>+</sup> Calcd for C<sub>17</sub>H<sub>14</sub>F<sub>3</sub>NNaO<sup>+</sup> 328.0920; Found 328.0917.

**(E)-4-methoxy-N-methyl-2-(3,3,3-trifluoroprop-1-en-1-yl)benzamide (5d)**

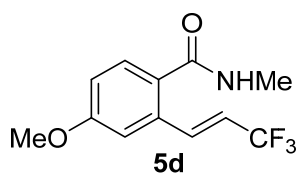

The crude product was purified by flash column chromatography on silica gel to afford **5d** (15.9 mg, 61% yield) as a white solid.

**MP:** 151 – 152 °C

**<sup>1</sup>H NMR** (400 MHz, CDCl<sub>3</sub>) δ 7.65 (dq, *J* = 16.0, 2.2 Hz, 1H), 7.43 (d, *J* = 8.5 Hz, 1H), 7.02 (d, *J* = 2.5 Hz, 1H), 6.90 (dd, *J* = 8.5, 2.6 Hz, 1H), 6.12 (dq, *J* = 16.1, 6.4 Hz, 1H), 5.83 (s, 1H), 3.86 (s, 3H), 2.98 (d, *J* = 4.9 Hz, 3H).

**<sup>13</sup>C NMR** (101 MHz, CDCl<sub>3</sub>) δ 169.0, 161.1, 136.1 (q, *J* = 6.8 Hz), 134.4, 129.4, 129.0, 123.4 (q, *J* = 269.2 Hz), 118.3 (q, *J* = 34.0 Hz), 115.0, 112.5, 55.6, 27.0.

**<sup>19</sup>F NMR** (376 MHz, CDCl<sub>3</sub>) δ -63.42 (dd, *J* = 6.4, 2.3 Hz).

**IR (neat) cm<sup>-1</sup> v:** 3234 (m), 1649 (s), 1592 (s), 1541 (s), 1418 (s), 1307 (s), 1307 (s), 1209 (s), 1096 (s), 1018 (m), 953 (m), 792 (w), 760 (w).

**HRMS** (ESI) *m/z*: [M + H]<sup>+</sup> Calcd for C<sub>12</sub>H<sub>13</sub>F<sub>3</sub>NO<sub>2</sub><sup>+</sup> 260.0893; Found 260.0896.

**(*E*)-4-fluoro-*N*-methyl-2-(3,3,3-trifluoroprop-1-en-1-yl)benzamide (5e)**

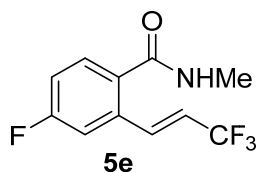

The crude product was purified by flash column chromatography on silica gel to afford **5e** (18.2 mg, 74% yield) as a white solid.

**MP:** 148 – 149 °C

**<sup>1</sup>H NMR** (400 MHz, CDCl<sub>3</sub>) δ 7.50 (d, *J* = 16.0 Hz, 1H), 7.42 – 7.37 (m, 1H), 7.20 – 7.16 (m, 1H), 7.01 (t, *J* = 8.1 Hz, 1H), 6.13 – 6.02 (m, 1H), 5.85 (s, 1H), 2.92 (d, *J* = 4.8 Hz, 3H).

**<sup>13</sup>C NMR** (101 MHz, CDCl<sub>3</sub>) δ 168.4, 163.6 (d, *J* = 251.1 Hz), 134.9 (d, *J* = 8.2 Hz), 134.7 (m), 132.8 (d, *J* = 3.3 Hz), 129.8 (d, *J* = 8.6 Hz), 123.1 (q, *J* = 269.6 Hz), 119.4 (q, *J* = 34.3 Hz), 116.8 (d, *J* = 21.7 Hz), 114.0 (d, *J* = 22.7 Hz), 27.1.

**<sup>19</sup>F NMR** (376 MHz, CDCl<sub>3</sub>) δ -63.68 (d, *J* = 8.6 Hz), -109.0 – -109.1 (m).

**IR (neat)  $\text{cm}^{-1}$   $\nu$ :** 3294 (w), 1669 (w), 1631 (m), 1585 (w), 1552 (m), 1492 (w), 1419 (w), 1323 (m), 1271 (s), 1222 (w), 1170 (w), 1112 (s), 972 (m), 843 (w), 725 (w), 687 (m).

**HRMS (APCI)  $m/z$ :**  $[\text{M} + \text{H}]^+$  Calcd for  $\text{C}_{11}\text{H}_{10}\text{F}_4\text{NO}^+$  248.0693; Found 248.0695.

**(E)-4-chloro-N-methyl-2-(3,3,3-trifluoroprop-1-en-1-yl)benzamide (5f)**

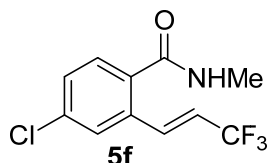

The crude product was purified by flash column chromatography on silica gel to afford **5f** (17.2 mg, 65% yield) as a white solid.

**MP:** 140 – 142 °C

**$^1\text{H}$  NMR** (400 MHz,  $\text{CDCl}_3$ )  $\delta$  7.53 (dq,  $J = 16.0, 2.2$  Hz, 2H), 7.53 (d,  $J = 2.0$  Hz, 1H), 7.40 (d,  $J = 8.2$  Hz, 1H), 7.35 (dd,  $J = 8.2, 2.0$  Hz, 1H), 6.16 (dq,  $J = 16.1, 6.3$  Hz, 1H), 5.94 (s, 1H), 2.99 (d,  $J = 4.8$  Hz, 3H).

**$^{13}\text{C}$  NMR** (101 MHz,  $\text{CDCl}_3$ )  $\delta$  168.3, 136.8, 134.8, 134.5 (q,  $J = 6.9$  Hz), 134.1, 129.7, 129.0, 127.2, 123.1 (q,  $J = 269.6$  Hz), 119.4 (q,  $J = 34.3$  Hz), 27.1.

**$^{19}\text{F}$  NMR** (376 MHz,  $\text{CDCl}_3$ )  $\delta$  -63.69 (dd,  $J = 6.3, 2.4$  Hz).

**IR (neat)  $\text{cm}^{-1}$   $\nu$ :** 3292 (w), 1665 (w), 1633 (m), 1572 (w), 1563 (m), 1484 (w), 1414 (w), 1314 (s), 1286 (m), 1255 (m), 1103 (s), 971 (m), 917 (m), 836 (m), 693 (s).

**HRMS (APCI/QTOF)  $m/z$ :**  $[\text{M} + \text{H}]^+$  Calcd for  $\text{C}_{11}\text{H}_{10}\text{ClF}_3\text{NO}^+$  264.0398; Found 264.0403.

**(E)-4-bromo-N-methyl-2-(3,3,3-trifluoroprop-1-en-1-yl)benzamide (5g)**

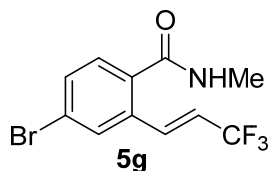

The crude product was purified by flash column chromatography on silica gel to afford **5g** (19.4 mg, 65% yield) as a white solid.

**MP:** 142 – 144 °C

**<sup>1</sup>H NMR** (400 MHz, CDCl<sub>3</sub>)  $\delta$  7.60 (s, 1H), 7.46 – 7.39 (m, 2H), 7.24 (d,  $J$  = 8.1 Hz, 1H), 6.12 – 6.02 (m, 1H), 5.75 (s, 1H), 2.90 (d,  $J$  = 4.9 Hz, 3H).

**<sup>13</sup>C NMR** (101 MHz, CDCl<sub>3</sub>)  $\delta$  168.3, 135.2, 134.4 (q,  $J$  = 7.0 Hz), 134.2, 132.7, 130.2, 129.1, 124.9, 123.0 (q,  $J$  = 269.5 Hz), 119.5 (q,  $J$  = 34.2 Hz), 27.1.

**<sup>19</sup>F NMR** (376 MHz, CDCl<sub>3</sub>)  $\delta$  -63.69 (d,  $J$  = 6.4 Hz).

**IR (neat) cm<sup>-1</sup> v:** 3283 (w), 2161 (w), 1666 (w), 1630 (m), 1562 (m), 1415 (w), 1315 (s), 1258 (m), 1108 (s), 967 (w), 901 (w), 829 (w), 723 (w), 699 (m).

**HRMS** (ESI/QTOF)  $m/z$ : [M + H]<sup>+</sup> Calcd for C<sub>11</sub>H<sub>10</sub>BrF<sub>3</sub>NO<sup>+</sup> 307.9892; Found 307.9892.

**(E)-4-cyano-N-methyl-2-(3,3,3-trifluoroprop-1-en-1-yl)benzamide (5h)**

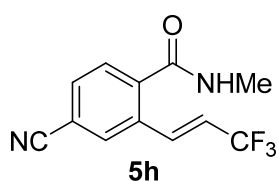

The crude product was purified by flash column chromatography on silica gel to afford **5h** (17.4 mg, 68% yield) as a white solid.

**MP:** 136 – 138°C

**<sup>1</sup>H NMR** (400 MHz, CDCl<sub>3</sub>) δ 7.84 (d, *J* = 1.4 Hz, 1H), 7.68 (dd, *J* = 8.0, 1.5 Hz, 1H), 7.58 (d, *J* = 7.9 Hz, 1H), 7.51 (dq, *J* = 16.2, 2.3 Hz, 1H), 6.23 (dq, *J* = 16.1, 6.2 Hz, 1H), 5.95 (s, 1H), 3.02 (d, *J* = 4.9 Hz, 3H).

**<sup>13</sup>C NMR** (101 MHz, CDCl<sub>3</sub>) δ 167.4, 140.2, 133.62 (q, *J* = 3.0 Hz), 133.56, 132.9, 130.9, 128.5, 122.8 (q, *J* = 269.8 Hz), 120.7 (q, *J* = 34.5 Hz), 117.5, 114.8, 27.1.

**<sup>19</sup>F NMR** (376 MHz, CDCl<sub>3</sub>) δ -63.92 (dd, *J* = 6.1, 2.4 Hz).

**IR (neat) cm<sup>-1</sup> ν:** 3282 (w), 2236 (w), 1641 (m), 1570 (w), 1315 (m), 1269 (m), 1140 (s), 1112 (s), 980 (w), 839 (w), 680 (m).

**HRMS** (APCI) *m/z*: [M + H]<sup>+</sup> Calcd for C<sub>12</sub>H<sub>10</sub>F<sub>3</sub>N<sub>2</sub>O<sup>+</sup> 255.0740; Found 255.0734.

**(*E*)-*N*,3-dimethyl-2-(3,3,3-trifluoroprop-1-en-1-yl)benzamide (**5i**)**

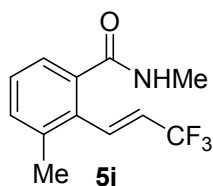

The crude product was purified by flash column chromatography on silica gel to afford **5i** (16.4 mg, 68% yield) as a white solid.

**MP:** 103 – 104 °C

**<sup>1</sup>H NMR** (400 MHz, CDCl<sub>3</sub>) δ 7.28 (dq, *J* = 16.4, 2.4 Hz, 1H), 7.23 – 7.19 (m, 3H), 5.89 (dq, *J* = 16.3, 6.3 Hz, 1H), 5.61 (s, 1H), 2.87 (d, *J* = 4.9 Hz, 3H), 2.28 (s, 3H).

**<sup>13</sup>C NMR** (101 MHz, CDCl<sub>3</sub>) δ 170.3, 137.3, 137.0, 134.7 (q, *J* = 7.0 Hz), 132.0, 131.0, 128.8, 125.4, 123.0 (q, *J* = 269.4 Hz), 121.8 (q, *J* = 33.6 Hz), 26.9, 20.6.

**<sup>19</sup>F NMR** (376 MHz, CDCl<sub>3</sub>) δ -64.28 (dd, *J* = 6.6, 2.5 Hz).

**IR (neat)  $\text{cm}^{-1}$  v:** 3302 (w), 1670 (w), 1637 (m), 1545 (m), 1312 (s), 1272 (m), 1108 (s), 969 (m), 877 (w), 785 (w), 760 (w), 722 (w).

**HRMS (ESI) m/z:**  $[\text{M} + \text{H}]^+$  Calcd for  $\text{C}_{12}\text{H}_{13}\text{F}_3\text{NO}^+$  244.0944; Found 244.0944.

**(E)-3-methoxy-N-methyl-2-(3,3,3-trifluoroprop-1-en-1-yl)benzamide (5j)**

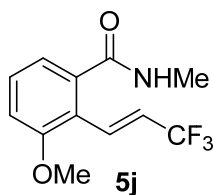

The crude product was purified by flash column chromatography on silica gel to afford **5j** (16.3 mg, 74% yield) as a white solid.

**MP:** 107 – 108 °C.

**$^1\text{H}$  NMR** (400 MHz,  $\text{CDCl}_3$ )  $\delta$  7.26 – 7.20 (m, 1H), 7.21 (dq,  $J = 16.2, 2.3$  Hz, 1H), 6.92-6.88 (m, 2H), 6.43 (dq,  $J = 16.2, 6.6$  Hz, 1H), 6.10 (s, 1H), 3.84 (s, 3H), 2.86 (d,  $J = 4.9$  Hz, 3H).

**$^{13}\text{C}$  NMR** (101 MHz,  $\text{CDCl}_3$ )  $\delta$  169.9, 158.6, 139.2, 130.8 (q,  $J = 7.4$  Hz), 130.4, 123.7 (q,  $J = 269.4$  Hz), 120.6 (q,  $J = 33.0$  Hz), 119.64, 119.62, 112.3, 55.8, 26.8.

**$^{19}\text{F}$  NMR** (376 MHz,  $\text{CDCl}_3$ )  $\delta$  -63.91 (dd,  $J = 6.6, 2.4$  Hz).

**IR (neat)  $\text{cm}^{-1}$  v:** 3287 (w), 2361 (w), 1633 (m), 1542 (w), 1469 (w), 1313 (s), 1259 (s), 1112 (s), 1074 (s), 1014 (w), 972 (m), 910 (w), 841 (w), 783 (w), 725 (s).

**HRMS (ESI) m/z:**  $[\text{M} + \text{H}]^+$  Calcd for  $\text{C}_{12}\text{H}_{13}\text{F}_3\text{NO}_2^+$  260.0893; Found 260.0900.

**(E)-3-fluoro-N-methyl-2-(3,3,3-trifluoroprop-1-en-1-yl)benzamide (5k)**

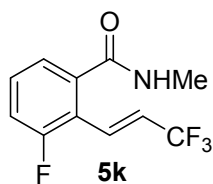

The crude product was purified by flash column chromatography on silica gel to afford **5k** (16.8 mg, 68% yield) as a white solid.

**MP:** 138 – 139 °C.

**<sup>1</sup>H NMR** (400 MHz, CDCl<sub>3</sub>)  $\delta$  7.34 (td,  $J = 8.0, 5.1$  Hz, 1H), 7.26 (dq,  $J = 16.5, 2.3$  Hz, 1H), 7.23-7.21 (m, 1H), 7.20-7.15(m, 1H), 6.42 (dq,  $J = 16.5, 6.4$  Hz, 1H), 5.96 (s, 1H), 2.98 (d,  $J = 4.9$  Hz, 3H).

**<sup>13</sup>C NMR** (101 MHz, CDCl<sub>3</sub>)  $\delta$  168.4 (d,  $J = 3.2$  Hz), 161.4 (d,  $J = 254.5$  Hz), 139.2, 130.9 (d,  $J = 9.6$  Hz), 128.8 (q,  $J = 7.3$  Hz), 123.2 (q,  $J = 269.6$  Hz), 123.4 (d,  $J = 3.6$  Hz), 122.6 (qd,  $J = 33.8, 13.5$  Hz), 119.7 (d,  $J = 12.5$  Hz), 27.0.

**<sup>19</sup>F NMR** (376 MHz, CDCl<sub>3</sub>)  $\delta$  -64.41 (dd,  $J = 6.3, 2.4$  Hz), -110.67 (dd,  $J = 11.2, 5.2$  Hz).

**IR (neat) cm<sup>-1</sup> v:** 3286 (w), 2162 (w), 1667 (w), 1634 (m), 1604 (m), 1543 (m), 1460 (w), 1419 (w), 1320 (s), 1276 (s), 1247 (m), 1205 (m), 1109 (s), 1049 (w), 972 (m), 938 (w), 847 (m), 786 (m), 730 (m), 683 (m).

**HRMS** (ESI)  $m/z$ : [M + Na]<sup>+</sup> Calcd for C<sub>11</sub>H<sub>9</sub>F<sub>4</sub>NNaO<sup>+</sup> 270.0512; Found 270.0516.

**(E)-3-chloro-N-methyl-2-(3,3,3-trifluoroprop-1-en-1-yl)benzamide (5l)**

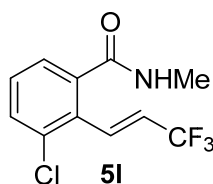

The crude product was purified by flash column chromatography on silica gel to afford **5l** (19.5 mg, 74% yield) as a white solid.

**MP:** 101 – 102 °C

**<sup>1</sup>H NMR** (400 MHz, CDCl<sub>3</sub>) δ 7.47 (dd, *J* = 7.4, 2.0 Hz, 1H), 7.36 (dq, *J* = 16.3, 2.3 Hz, 1H), 7.33 – 7.28 (m, 2H), 6.15 (dq, *J* = 16.3, 6.3 Hz, 1H), 5.78 (s, 1H), 2.93 (d, *J* = 4.9 Hz, 3H).

**<sup>13</sup>C NMR** (101 MHz, CDCl<sub>3</sub>) δ 168.9, 138.6, 134.6, 132.5 (q, *J* = 7.2 Hz), 131.3, 130.1, 126.3, 123.0 (q, *J* = 33.8 Hz), 122.8 (q, *J* = 270.8 Hz), 27.0.

**<sup>19</sup>F NMR** (376 MHz, CDCl<sub>3</sub>) δ –64.62 (dd, *J* = 6.3, 2.3 Hz).

**IR (neat) cm<sup>-1</sup> ν:** 3268 (w), 2361 (w), 1635 (m), 1542 (m), 1470 (m), 1311 (s), 1258 (s), 1111 (s), 1081 (s), 970 (m), 789 (w), 722 (s).

**HRMS (ESI) m/z:** [M + Na]<sup>+</sup> Calcd for C<sub>11</sub>H<sub>9</sub>ClF<sub>3</sub>NNaO<sup>+</sup> 286.0217; Found 286.0215.

**(*E*)-3-bromo-*N*-methyl-2-(3,3,3-trifluoroprop-1-en-1-yl)benzamide (5m)**

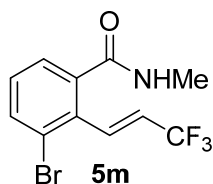

The crude product was purified by flash column chromatography on silica gel to afford **5m** (21.7 mg, 71% yield) as a white solid.

**MP:** 96 – 97 °C

**<sup>1</sup>H NMR** (400 MHz, CDCl<sub>3</sub>) δ 7.67 (dd, *J* = 8.0, 1.0 Hz, 1H), 7.40 (dd, *J* = 7.6, 1.2 Hz, 1H), 7.33 (dq, *J* = 16.3, 2.3 Hz, 1H), 7.26-7.22 (m, 1H), 6.10 (dq, *J* = 16.3, 6.3 Hz, 1H), 5.66 (s, 1H), 2.94 (d, *J* = 4.8 Hz, 3H).

**<sup>13</sup>C NMR** (101 MHz, CDCl<sub>3</sub>) δ 168.9, 138.6, 134.8 (q, *J* = 7.2 Hz), 134.5, 132.0, 130.3, 127.0, 124.5, 122.9 (q, *J* = 33.9 Hz), 122.7 (q, *J* = 268.6 Hz), 27.0.

**<sup>19</sup>F NMR** (376 MHz, CDCl<sub>3</sub>) δ –64.65 (dd, *J* = 6.3, 2.5 Hz).



**IR (neat)  $\text{cm}^{-1}$   $\nu$ :** 3287 (w), 1645 (m), 1547 (m), 1430 (w), 1411 (w), 1312 (s), 1269 (m), 1138 (m), 1115 (s), 969 (m), 889 (w), 800 (w), 767 (w), 685 (m).

**HRMS (ESI)  $m/z$ :**  $[\text{M} + \text{H}]^+$  Calcd for  $\text{C}_{11}\text{H}_{10}\text{BrF}_3\text{NO}^+$  307.9892; Found 307.9890.

**(E)-N,5-dimethyl-2-(3,3,3-trifluoroprop-1-en-1-yl)benzamide (5n)**

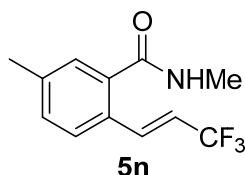

The crude product was purified by flash column chromatography on silica gel to afford **5n** (17.6 mg, 72% yield) as a white solid.

**MP:** 138-139 °C

**$^1\text{H}$  NMR** (400 MHz,  $\text{CDCl}_3$ )  $\delta$  7.53 (dq,  $J = 16.2, 2.3$  Hz, 1H), 7.47 (d,  $J = 7.9$  Hz, 1H), 7.35 – 7.14 (m, 2H), 6.13 (dq,  $J = 16.1, 6.5$  Hz, 1H), 5.78 (s, 1H), 3.01 (d,  $J = 4.7$  Hz, 3H), 2.38 (s, 3H).

**$^{13}\text{C}$  NMR** (101 MHz,  $\text{CDCl}_3$ )  $\delta$  169.5, 140.2, 136.7, 135.4 (q,  $J = 7.0$  Hz), 131.3, 129.2, 128.2, 127.1, 123.5 (q,  $J = 269.2$  Hz), 117.3 (q,  $J = 33.7$  Hz), 27.0, 21.4.

**$^{19}\text{F}$  NMR** (376 MHz,  $\text{CDCl}_3$ )  $\delta$  -63.29 (dd,  $J = 6.5, 2.3$  Hz).

**IR (neat)  $\text{cm}^{-1}$   $\nu$ :** 3296 (w), 2361 (s), 1635 (m), 1544 (w), 1409 (w), 1323 (w), 1272 (m), 1116 (s), 1057 (w), 723 (w).

**HRMS (ESI)  $m/z$ :**  $[\text{M} + \text{Na}]^+$  Calcd for  $\text{C}_{12}\text{H}_{12}\text{F}_3\text{NNaO}^+$  266.0763; Found 266.0763.

**(E)-5-methoxy-N-methyl-2-(3,3,3-trifluoroprop-1-en-1-yl)benzamide (5o)**

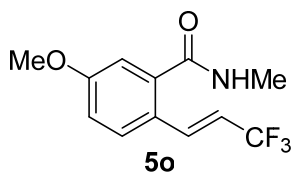

The crude product was purified by flash column chromatography on silica gel to afford **5o** (17.4 mg, 67% yield) as a white solid.

**MP:** 123 – 124 °C

**<sup>1</sup>H NMR** (400 MHz, CDCl<sub>3</sub>) δ 7.46 (d, *J* = 8.6 Hz, 1H), 7.39 (dq, *J* = 16.1, 2.2 Hz, 1H), 6.96 – 6.87 (m, 2H), 6.17 – 6.08 (m, 1H), 6.01 (dq, *J* = 16.1, 6.5 Hz, 1H), 3.80 (s, 3H), 2.94 (d, *J* = 4.9 Hz, 3H).

**<sup>13</sup>C NMR** (101 MHz, CDCl<sub>3</sub>) δ 169.1, 160.4, 138.1, 134.7 (q, *J* = 6.9 Hz), 128.3, 126.2 (d, *J* = 269.0 Hz), 124.0, 116.1, 115.7 (d, *J* = 33.7 Hz), 112.6, 55.5, 26.8.

**<sup>19</sup>F NMR** (376 MHz, CDCl<sub>3</sub>) δ –63.04 (dd, *J* = 6.6, 2.2 Hz).

**HRMS** (ESI) *m/z*: [M + H]<sup>+</sup> Calcd for C<sub>12</sub>H<sub>13</sub>F<sub>3</sub>NO<sub>2</sub><sup>+</sup> 260.0893; Found 260.0894.

**(*E*)-5-chloro-*N*-methyl-2-(3,3,3-trifluoroprop-1-en-1-yl)benzamide (5p)**

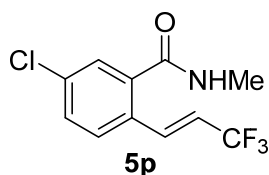

The crude product was purified by flash column chromatography on silica gel to afford **5p** (16.5 mg, 62% yield) as a white solid.

**MP:** 144 – 145 °C

**<sup>1</sup>H NMR** (400 MHz, CDCl<sub>3</sub>) δ 7.54 – 7.46 (m, 2H), 7.45 – 7.38 (m, 2H), 6.14 (dq, *J* = 16.1, 6.4 Hz, 1H), 5.96 (s, 1H), 3.00 (d, *J* = 4.9 Hz, 3H).

**<sup>13</sup>C NMR** (101 MHz, CDCl<sub>3</sub>) δ 167.8, 137.9, 135.8, 134.4 (q, *J* = 6.9 Hz), 130.7, 130.6, 128.5, 127.8, 123.2 (q, *J* = 269.4 Hz), 118.7 (q, *J* = 34.0 Hz), 27.1.

**<sup>19</sup>F NMR** (376 MHz, CDCl<sub>3</sub>) δ – 63.57 (dd, *J* = 6.3, 2.3 Hz).

**IR (neat)  $\text{cm}^{-1}$   $\nu$ :** 3300 (w), 1704 (w), 1669 (w), 1639 (m), 1555 (w), 1318 (m), 1286 (m), 1131 (m), 1105 (s), 971 (m), 877 (m), 820 (m), 721 (m), 695 (m).

**HRMS (APCI)  $m/z$ :**  $[\text{M} + \text{H}]^+$  Calcd for  $\text{C}_{11}\text{H}_{10}\text{ClF}_3\text{NO}^+$  264.0398; Found 264.0401.

**(*E*)-5-bromo-*N*-methyl-2-(3,3,3-trifluoroprop-1-en-1-yl)benzamide (5q)**

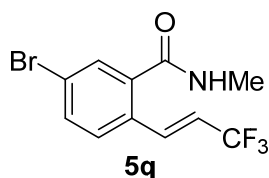

The crude product was purified by flash column chromatography on silica gel to afford **5q** (19.3 mg, 63% yield) as a white solid.

**MP:** 138 – 139 °C

**$^1\text{H}$  NMR** (400 MHz,  $\text{CDCl}_3$ )  $\delta$  7.63 – 7.53 (m, 2H), 7.53 – 7.43 (m, 1H), 7.42 (d,  $J = 8.3$  Hz, 1H), 6.15 (dq,  $J = 16.1, 6.4$  Hz, 1H), 5.99 (s, 1H), 2.99 (d,  $J = 5.0$  Hz, 3H).

**$^{13}\text{C}$  NMR** (101 MHz,  $\text{CDCl}_3$ )  $\delta$  167.7, 138.1, 134.5 (q,  $J = 6.9$  Hz), 133.6, 131.1, 130.7, 128.6, 123.8, 123.2 (q,  $J = 270.5$  Hz), 118.7 (q,  $J = 34.2$  Hz), 27.1.

**$^{19}\text{F}$  NMR** (376 MHz,  $\text{CDCl}_3$ )  $\delta$  – 63.60 (dd,  $J = 6.3, 2.5$  Hz).

**IR (neat)  $\text{cm}^{-1}$   $\nu$ :** 3268 (w), 2016 (w), 1675 (s), 1602 (s), 1576 (s), 1346 (s), 1302 (s), 1256 (s), 1119 (s), 985 (m), 904 (w), 901 (w), 798 (w).

**HRMS (ESI)  $m/z$ :**  $[\text{M} + \text{H}]^+$  Calcd for  $\text{C}_{11}\text{H}_{10}\text{BrF}_3\text{NO}^+$  307.9892; Found 307.9892.

**(*E*)-*N*-methyl-3-(3,3,3-trifluoroprop-1-en-1-yl)-2-naphthamide (5r)**

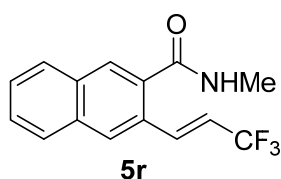

The crude product was purified by flash column chromatography on silica gel to afford **5r** (20.8 mg, 75% yield) as a white solid.

**MP:** 141 – 142 °C

**<sup>1</sup>H NMR** (400 MHz, CDCl<sub>3</sub>) δ 7.97 (s, 1H), 7.92 (s, 1H), 7.88 – 7.76 (m, 2H), 7.69 (dq, *J* = 16.0, 2.3 Hz, 1H), 7.62 – 7.49 (m, 2H), 6.23 (dq, *J* = 16.0, 6.5 Hz, 1H), 6.08 (s, 1H), 3.05 (d, *J* = 4.9 Hz, 3H).

**<sup>13</sup>C NMR** (101 MHz, CDCl<sub>3</sub>) δ 169.4, 136.2 (q, *J* = 6.9 Hz), 133.8, 133.7, 132.9, 129.7, 128.3, 128.2, 128.1, 127.9, 127.6, 127.4, 123.4 (q, *J* = 269.3 Hz), 118.0 (q, *J* = 33.8 Hz), 27.1.

**<sup>19</sup>F NMR** (376 MHz, CDCl<sub>3</sub>) δ –63.28 (dd, *J* = 6.5, 2.3 Hz).

**IR (neat) cm<sup>-1</sup> v:** 3294 (w), 2158 (w), 1664 (w), 1624 (s), 1549 (m), 1308 (s), 1270 (m), 1123 (s), 1101 (s), 966 (m), 746 (s), 685 (m).

**HRMS** (ESI<sup>+</sup>m/z: [M + H]<sup>+</sup> Calcd for C<sub>15</sub>H<sub>13</sub>F<sub>3</sub>NO<sup>+</sup> 280.0944; Found 280.0948.

**(*E*)-*N*-methyl-1-(3,3,3-trifluoroprop-1-en-1-yl)-2-naphthamide (5s)**

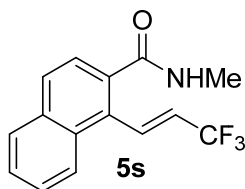

The crude product was purified by flash column chromatography on silica gel to afford **5s** (17.7 mg, 64% yield) as a white solid.

**MP:** 157 – 158 °C

**<sup>1</sup>H NMR** (400 MHz, CDCl<sub>3</sub>) δ 8.05 – 7.96 (m, 1H), 7.91 – 7.83 (m, 2H), 7.76 (dq, *J* = 16.3, 2.3 Hz, 1H), 7.62 – 7.56 (m, 2H), 7.53 (d, *J* = 8.5 Hz, 1H), 6.13 (dq, *J* = 16.3, 6.4 Hz, 1H), 5.79 (s, 1H), 2.99 (d, *J* = 4.9 Hz, 3H).

$^{13}\text{C}$  NMR (101 MHz,  $\text{CDCl}_3$ )  $\delta$  170.1, 134.1 (d,  $J = 7.0$  Hz), 134.0, 133.9, 130.9, 129.6, 129.4, 128.7, 127.7, 127.4, 125.1, 124.3, 123.4 (q,  $J = 33.7$  Hz), 122.9 (q,  $J = 271.1$  Hz), 27.0

$^{19}\text{F}$  NMR (376 MHz,  $\text{CDCl}_3$ )  $\delta$  -64.24 (dd,  $J = 6.3, 2.4$  Hz).

IR (neat)  $\text{cm}^{-1}$   $\nu$ : 3291 (w), 1667 (w), 1629 (m), 1545 (w), 1481 (w), 1410 (w), 1304 (m), 1261 (m), 1114 (s), 970 (w), 911 (w), 839 (w), 762 (m), 699 (s).

HRMS (ESI)  $m/z$ :  $[\text{M} + \text{H}]^+$  Calcd for  $\text{C}_{15}\text{H}_{13}\text{F}_3\text{NO}^+$  280.0944; Found 280.0943.

**(*E*)-*N*-ethyl-2-(3,3,3-trifluoroprop-1-en-1-yl)benzamide (5t)**

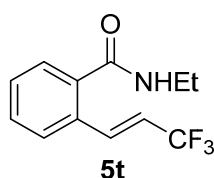

The crude product was purified by flash column chromatography on silica gel to afford **5t** (15.1 mg, 62% yield) as a white solid.

MP: 86-87 °C

$^1\text{H}$  NMR (400 MHz,  $\text{CDCl}_3$ )  $\delta$  7.62 – 7.54 (m, 2H), 7.52 – 7.36 (m, 3H), 6.17 (dq,  $J = 16.1, 6.4$  Hz, 1H), 5.77 (s, 1H), 3.50 (qd,  $J = 7.3, 5.7$  Hz, 2H), 1.25 (t,  $J = 7.3$  Hz, 3H).

$^{13}\text{C}$  NMR (101 MHz,  $\text{CDCl}_3$ )  $\delta$  168.5, 136.9, 135.6 (q,  $J = 6.8$  Hz), 132.0, 130.6, 129.8, 127.6, 127.1, 123.4 (q,  $J = 269.2$  Hz), 118.3 (q,  $J = 34.0$  Hz), 35.2, 15.0.

$^{19}\text{F}$  NMR (376 MHz,  $\text{CDCl}_3$ )  $\delta$  -63.52 (dd,  $J = 6.4, 2.3$  Hz).

IR (neat)  $\text{cm}^{-1}$   $\nu$ : 3298 (w), 1668 (w), 1630 (m), 1597 (w), 1540 (m), 1314 (m), 1270 (s), 1128 (m), 1105 (s), 971 (m), 877 (w), 751 (m), 695 (m).

HRMS (ESI)  $m/z$ :  $[\text{M} + \text{H}]^+$  Calcd for  $\text{C}_{12}\text{H}_{13}\text{F}_3\text{NO}^+$  244.0944; Found 244.0943.

**(E)-N-methyl-2-(4,4,4-trifluorobut-2-en-2-yl)benzamide (5u) & N-methyl-2-(4,4,4-trifluorobut-1-en-2-yl)benzamide (5u')**

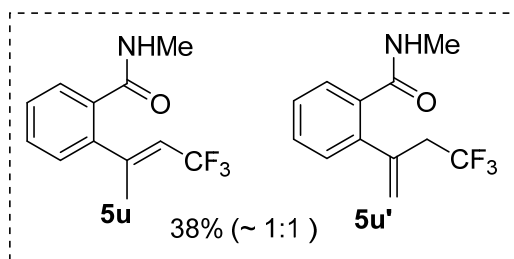

The crude product was purified by flash column chromatography on silica gel to afford **5u**, **5u'** (9.3 mg, 38% yield, **5u:5u'**  $\approx$  1:1) as a white solid.

**$^1\text{H}$  NMR** (400 MHz,  $\text{CDCl}_3$ )  $\delta$  7.47 (dd,  $J = 7.5, 1.5$  Hz, 1H), 7.44 (dd,  $J = 7.6, 1.5$  Hz, 1H), 7.37 – 7.23 (m, 4H), 7.15 (dd,  $J = 7.5, 1.4$  Hz, 1H), 7.13 (dd,  $J = 7.4, 1.6$  Hz, 1H), 5.90 (brs, 1H), 5.85 (brs, 1H), 5.60 (qq,  $J = 16.0, 1.4$  Hz, 1H), 5.40 (s, 1H), 5.31 (s, 1H), 3.13 (qd,  $J = 10.8, 1.1$  Hz, 2H), 2.87 (d,  $J = 4.8$  Hz, 3H), 2.86 (d,  $J = 4.8$  Hz, 3.6H), 2.13 (qd,  $J = 2.4, 1.4$  Hz, 3H).

**$^{13}\text{C}$  NMR** (101 MHz,  $\text{CDCl}_3$ )  $\delta$  169.8, 169.3, 150.9 (q,  $J = 5.7$  Hz), 140.6, 139.3, 139.0 (q,  $J = 2.9$  Hz), 134.66, 134.64, 130.4, 130.3, 129.5, 128.9, 128.6, 128.2, 128.14, 128.07, 127.9, 125.6 (q,  $J = 277.7$  Hz), 123.1 (q,  $J = 271.3$  Hz), 121.9, 118.0 (q,  $J = 33.9$  Hz), 41.2 (q,  $J = 28.9$  Hz), 26.8, 26.79, 19.7.

**$^{19}\text{F}$  NMR** (376 MHz,  $\text{CDCl}_3$ )  $\delta$  -58.12, -64.47.

**IR (neat)  $\text{cm}^{-1}$  v:** 3240 (w), 1631 (m), 1564 (w), 1552 (m), 1412 (w), 1350 (w), 1317 (w), 1253 (s), 1131 (s), 1117 (s), 1080 (s), 931 (w), 846 (w), 757 (m).

**HRMS (ESI) m/z:**  $[\text{M} + \text{Na}]^+$  Calcd for  $\text{C}_{12}\text{H}_{12}\text{F}_3\text{NNaO}^+$  266.0763; Found 266.0764.

## Supplementary Notes

### Supplementary Note 1: mechanism study

#### a) Synthesis and characterization data of 2-alkyl benzohdrazides 3a-D2 & 7.

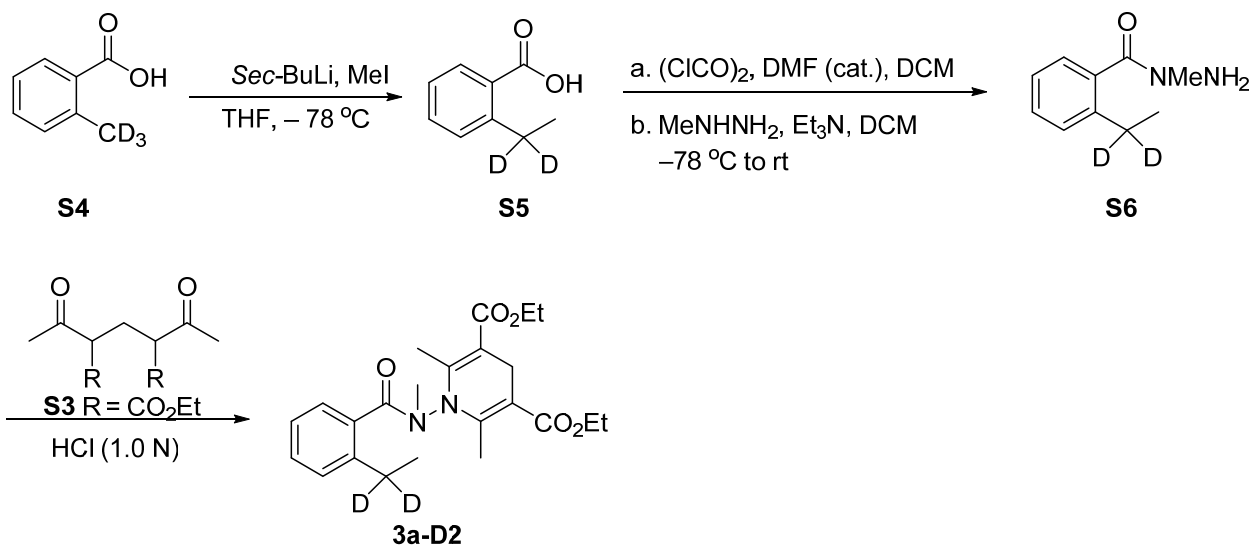

To a solution of **S4** (0.83g, 6.0 mmol, 1.0 equiv) in THF (40 mL) was added *sec*-BuLi (8.6 mL, 1.4 M in cyclohexane, 2.0 equiv) at  $-78\text{ }^\circ\text{C}$ . The reaction mixture was stirred at  $-78\text{ }^\circ\text{C}$  for 1 h, then MeI (1.1 mL, 18.0 mmol, 3.0 equiv) was added to the above reaction mixture. The reaction mixture was stirred for 2 hours, and aqueous  $\text{NH}_4\text{Cl}$  solution was added into the mixture. The mixture was extracted with EtOAc. The organic extracts were washed with  $\text{Na}_2\text{CO}_3$  solution and brine, dried over  $\text{Na}_2\text{SO}_4$ . The solvent was removed under reduced pressure. The residue was purified by a short column flash chromatography ( $\text{SiO}_2$ , eluent: EtOAc) to give **S5**, which can be used directly in the next step.

Following the Studer's procedure,<sup>1</sup> the **3a-D2** was prepared.

<sup>1</sup>H NMR (400 MHz, Acetone-*d*<sub>6</sub>)  $\delta$  7.49 – 7.42 (m, 1.5 H), 7.40 – 7.27 (m, 2H), 7.18 – 7.06 (m, 0.5 H), 4.19 (q,  $J = 7.1$  Hz)/4.11 (qd,  $J = 7.1, 3.7$  Hz)\* (4 H), 3.47, 3.13 (ABq,  $J = 18.4$  Hz)/ 3.19 (d,  $J = 17.0$  Hz)\*, 1.66 (dhept,  $J = 17.0, 1.7$  Hz)\* (2H), 3.22/3.49\* (s, 3H), 2.40 (t,  $J = 1.2$  Hz)/2.37 (d,  $J = 1.7$  Hz)\* (6H), 1.29 (t,  $J = 7.1$  Hz)/1.21 (t,  $J = 7.1$  Hz)\* (6H), 1.25 (brs)/1.20 (brs) (3H). (Signals marked with an asterisk (\*) correspond to the peaks assigned to the minor rotamer.).

<sup>13</sup>C NMR (101 MHz, Acetone-*d*<sub>6</sub>) (major rotamer)  $\delta$  170.1, 167.0, 148.1, 141.2, 134.4, 130.0, 129.4, 126.1, 126.0, 102.2, 59.6, 40.8, 24.9, 15.1, 13.9, 13.9.

<sup>13</sup>C NMR (101 MHz, Acetone-*d*<sub>6</sub>) (minor rotamer)  $\delta$  172.3, 166.3, 149.6, 141.6, 134.1, 129.3, 128.6, 125.4, 124.8, 103.2, 59.6, 40.0, 22.8, 14.9, 14.7, 13.8.

IR (neat)  $\text{cm}^{-1}$   $\nu$ : 2860 (w), 1698 (m), 1668 (s), 1445 (w), 1388 (m), 1295 (m), 1216 (s), 1199 (s), 1134 (m), 1103 (s), 1024 (s), 760 (m), 740 (s), 699 (m).

HRMS (ESI)  $m/z$ :  $[M + H]^+$  Calcd for C<sub>23</sub>H<sub>29</sub>D<sub>2</sub>N<sub>2</sub>O<sub>5</sub><sup>+</sup> 417.2353; Found 417.2352.

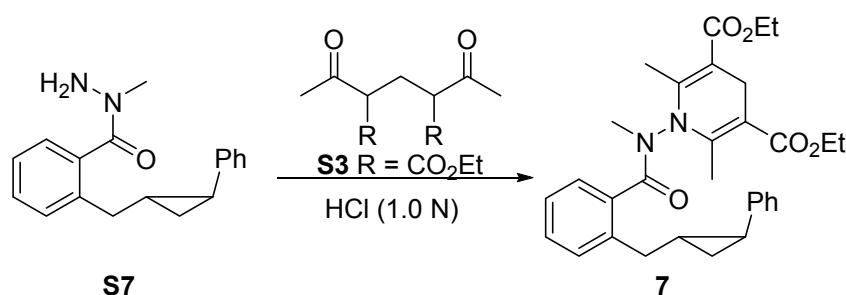

Following the Studer's procedure,<sup>1</sup> compound **7** was prepared from compound **S7**.

**diethyl 2,6-dimethyl-1-(*N*-methyl-2-((2-phenylcyclopropyl)methyl)benzamido)-1,4-dihydropyridine-3,5-dicarboxylate (**7**)**

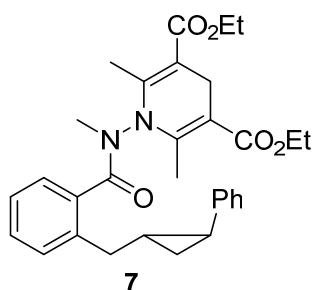

<sup>1</sup>H NMR (400 MHz, Acetone-*d*<sub>6</sub>)  $\delta$  7.59 (d,  $J = 7.7$  Hz, 0.7H), 7.47 (q,  $J = 7.6$  Hz, 1H), 7.37 (dt,  $J = 14.8, 7.4$  Hz, 1.7H), 7.23 (t,  $J = 7.5$  Hz, 1.6H), 7.14-7.06 (m, 3H), 4.18 (q,  $J = 7.1$  Hz, 3H)/4.14 – 4.01 (m, 1H)\*, 3.47, 3.12 (ABq,  $J = 18.4$  Hz, 1.4H)/3.21\*, 1.65\* (d,  $J = 17.0$  Hz, 0.6H), 3.21/3.49\* (s, 3H), 2.92 – 2.80/2.78-2.60\* (m, 2H), 2.41/2.37\* (s, 3H), 2.39 (s, 3H), 1.96 – 1.87 (m, 1H), 1.49-1.35 (m, 1H), 1.28 (t,  $J = 7.2$  Hz)/1.01 (t,  $J = 6.9$  Hz)\* (3H), 1.24 – 1.19 (m, 2H), 1.01 (t,  $J = 6.9$  Hz, 3H). (Signals marked with an asterisk (\*) correspond to the peaks assigned to the minor rotamer.)



$^{13}\text{C}$  NMR (101 MHz, Acetone- $d_6$ ) (major rotamer)  $\delta$  170.1, 167.0, 148.0, 148.0, 143.2, 138.8, 134.5, 129.9, 128.2, 126.3, 126.0, 125.6, 125.2, 102.2, 59.6, 40.8, 36.9, 25.0, 23.8, 23.2, 15.6, 14.1, 14.0, 13.9.

$^{13}\text{C}$  NMR (101 MHz, Acetone- $d_6$ ) (minor rotamer)  $\delta$  172.4, 166.3, 149.6, 149.6, 143.4, 139.2, 134.3, 129.2, 129.0, 128.2, 125.6, 125.5, 125.22, 125.17, 103.4, 59.64, 40.1, 36.9, 23.8, 23.4, 22.9, 15.7, 14.8, 14.8, 13.8, 13.8.

**IR** (neat)  $\text{cm}^{-1}$   $\nu$ : 2980 (w), 1704 (m), 1667 (s), 1601 (w), 1443 (w), 1387 (m), 1365 (w), 1291 (m), 1280 (m), 1213 (s), 1112 (s), 1049 (s), 1001 (m), 972 (w), 886 (m), 875 (w), 770 (m), 750 (s), 721 (m).

**HRMS** (ESI)  $m/z$ :  $[\text{M} + \text{H}]^+$  Calcd for  $\text{C}_{31}\text{H}_{37}\text{N}_2\text{O}_5^+$  517.2697; Found 517.2697.

### b) Control experiments of $\gamma$ -azidation of 2-alkyl benzohydrazides

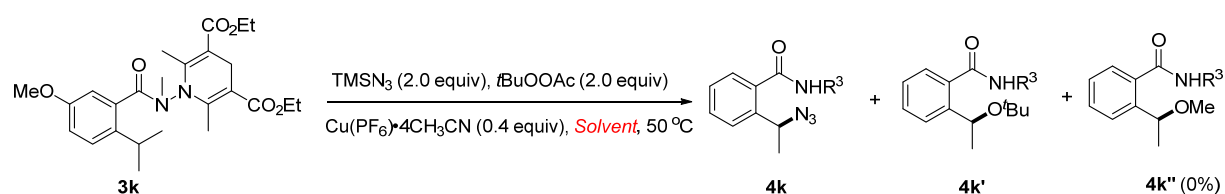

**Condition A:** A screw cap tube was charged with  $\text{Cu}(\text{PF}_6)_4\text{CH}_3\text{CN}$  (14.9 mg, 0.04 mmol, 0.4 equiv), substrate **3k** (0.1 mmol, 1.0 equiv),  $\text{TMSN}_3$  (26.5  $\mu\text{L}$ , 0.2 mmol, 2.0 equiv) and  $t\text{BuOH}$  (2.0 mL). The mixture was stirred at  $50^\circ\text{C}$  for 2 minutes, then  $t\text{BuOOAc}$  (32.2  $\mu\text{L}$ , 0.2 mmol, 2.0 equiv) was added to the above mixture. After being stirred for 2 hours at  $50^\circ\text{C}$  under  $\text{N}_2$  atmosphere, the reaction mixture was quenched with water, extracted with EtOAc. The organic extracts were washed with brine, dried over  $\text{Na}_2\text{SO}_4$ . The solvent was removed under reduced pressure. The residue was purified by flash chromatography ( $\text{SiO}_2$ , eluent: PE/EtOAc = 2/1) to give **4k** (16.8 mg, 72% yield) as an oil and **4k'** (5.6 mg, 21% yield) as an oil.

**Condition B:** A screw cap tube was charged with  $\text{Cu}(\text{PF}_6)_4\text{CH}_3\text{CN}$  (14.9 mg, 0.04 mmol, 0.4 equiv), substrate **3k** (0.1 mmol, 1.0 equiv),  $\text{TMSN}_3$  (26.5  $\mu\text{L}$ , 0.2 mmol, 2.0 equiv) and  $t\text{BuOH}$  (1.0 mL)/MeOH (1.0 mL). The mixture was stirred at  $50^\circ\text{C}$  for 2 minutes, then  $t\text{BuOOAc}$  (32.2  $\mu\text{L}$ , 0.2 mmol, 2.0 equiv) was added to the above mixture. After being stirred for 2 hours at  $50^\circ\text{C}$  under  $\text{N}_2$  atmosphere, the

reaction mixture was quenched with water, extracted with EtOAc. The organic extracts were washed with brine, dried over Na<sub>2</sub>SO<sub>4</sub>. The solvent was removed under reduced pressure. The residue was purified by flash chromatography (SiO<sub>2</sub>, eluent: PE/EtOAc = 2/1) to give **4k** (15.2 mg, 65% yield) as an oil and **4k'** (1.7 mg, 6% yield) as an oil.

**c) Radical clock experiment of  $\gamma$ -azidation of 2-alkyl benzohydrazides.**

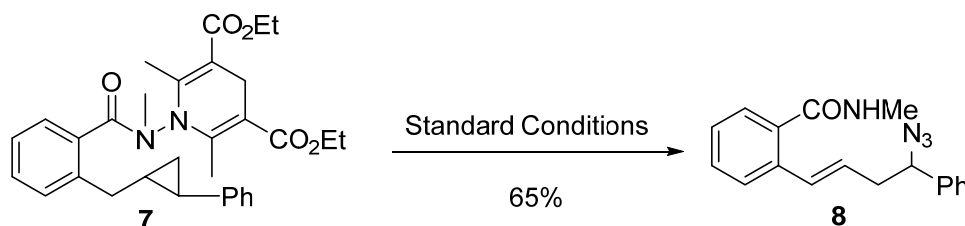

A screw cap tube was charged with Cu(PF<sub>6</sub>)•4CH<sub>3</sub>CN (14.9 mg, 0.04 mmol, 0.4 equiv), substrate **7** (0.1 mmol, 1.0 equiv), TMSN<sub>3</sub> (26.5  $\mu$ l, 0.2 mmol, 2.0 equiv) and *t*BuOH (2.0 mL). The mixture was stirred at 50 °C for 2 minutes, then *t*BuOOAc (32.2  $\mu$ l, 0.2 mmol, 2.0 equiv) was added to the above mixture. After being stirred for 2 hours at 50 °C under N<sub>2</sub> atmosphere, the reaction mixture was quenched with water, extracted with EtOAc. The organic extracts were washed with brine, dried over Na<sub>2</sub>SO<sub>4</sub>. The solvent was removed under reduced pressure. The residue was purified by flash chromatography (SiO<sub>2</sub>, eluent: PE/EtOAc = 2/1) to give **8** (19.8 mg, 65% yield).

**(E)-2-(4-azido-4-phenylbut-1-en-1-yl)-N-methylbenzamide (**8**)**

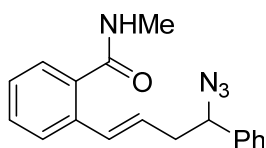

<sup>1</sup>H NMR (400 MHz, CDCl<sub>3</sub>)  $\delta$  7.48 – 7.23 (m, 9H), 6.80 (d, *J* = 15.8 Hz, 1H), 6.10 (dt, *J* = 15.2, 7.2 Hz, 1H), 5.84 (s, 1H), 4.62 (t, *J* = 7.1 Hz, 1H), 2.96 (d, *J* = 4.9 Hz, 3H), 2.80-2.67 (m, 2H).

<sup>13</sup>C NMR (101 MHz, CDCl<sub>3</sub>)  $\delta$  169.9, 139.1, 135.2, 135.0, 131.0, 130.1, 128.8, 128.4, 128.2, 127.6, 127.4, 126.9, 126.5, 65.9, 40.1, 26.8.

**IR (neat)  $\text{cm}^{-1}$   $\nu$ :** 3061 (w), 2095 (s), 2022 (w), 1635 (m), 1535 (m), 1475 (w), 1409 (w), 1309 (m), 1240 (m), 1159 (w), 1035 (w), 966 (m), 752 (s), 698 (s).

**HRMS (ESI)  $m/z$ :**  $[\text{M} + \text{Na}]^+$  Calcd for  $\text{C}_{18}\text{H}_{18}\text{N}_4\text{NaO}^+$  329.1373; Found 329.1374.

**d) Kinetic isotope effect of  $\gamma$ -azidation of 2-alkyl benzohydrazides.**

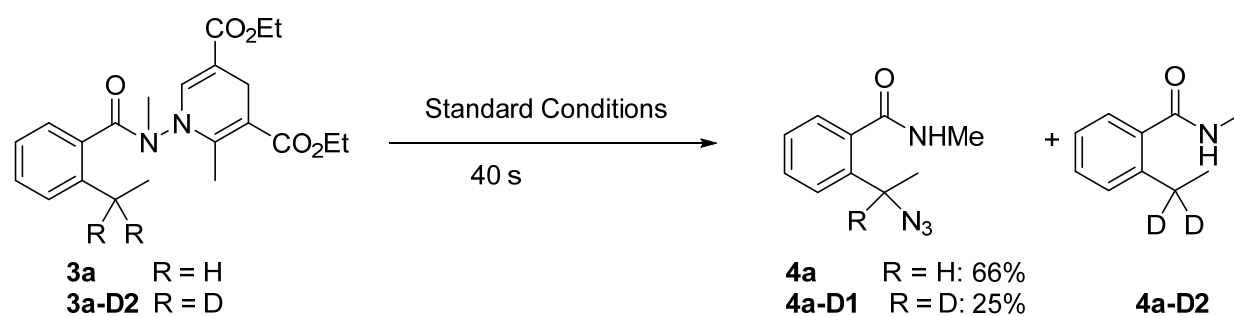

Two sets of reactions were carried out in parallel under the standard conditions, and quenched with aqueous  $\text{Na}_2\text{CO}_3$  in 40 s. The **4a** and **4a-D1** were isolated in 66% and 25% yield, respectively. Note: **4a-D1** was not pure, which was contaminated with amide **4a-D2**.

**2-(1-azidoethyl-1-d)-N-methylbenzamide (4a-D1)**

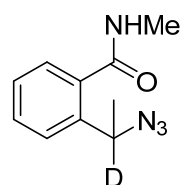

**$^1\text{H}$  NMR** (400 MHz,  $\text{CDCl}_3$ )  $\delta$  7.54 (dd,  $J = 7.9, 1.4$  Hz, 1H), 7.49 (td,  $J = 7.5, 1.5$  Hz, 1H), 7.40 (dd,  $J = 7.7, 1.5$  Hz, 1H), 7.33 (td,  $J = 7.4, 1.4$  Hz, 1H), 6.10 (s, 1H), 3.00 (d,  $J = 4.9$  Hz, 3H), 1.57 (s, 3H).

**$^{13}\text{C}$  NMR** (101 MHz,  $\text{CDCl}_3$ )  $\delta$  169.8, 139.5, 135.4, 130.6, 127.9, 127.0, 126.7, 26.8, 21.4. *Signals corresponding to the deuterium substituted carbon was not resolvable due to its anticipated weak intensity.*

**HRMS (ESI/QTOF)  $m/z$ :**  $[\text{M} + \text{Na}]^+$  Calcd for  $\text{C}_{10}\text{H}_{11}[\text{D}_2]\text{N}_4\text{NaO}^+$  228.0966; Found 228.0965.

**Amide 4-D2**  $^1\text{H}$  NMR (400 MHz,  $\text{CDCl}_3$ )  $\delta$  7.32 – 7.30 (m, 2H), 7.27 (dd,  $J = 7.8, 1.3$  Hz, 1H), 7.20 (td,  $J = 7.4, 1.4$  Hz, 1H), 5.84 (s, 1H), 2.99 (d,  $J = 6.4$  Hz, 3H), 1.22 (s, 3H).

**Amide 4-D2**  $^{13}\text{C}$  NMR (101 MHz,  $\text{CDCl}_3$ )  $\delta$  129.9, 129.4, 126.6, 125.7, 26.6, 15.7. *Signals corresponding to the deuterium substituted carbon was not resolvable due to its anticipated weak intensity*

**IR (neat)**  $\text{cm}^{-1}$   $\nu$ : 3272 (w), 2938 (w), 2089 (m), 1633 (m), 1543 (m), 1409 (w), 1310 (w), 1138 (w), 803 (w), 743 (w), 720 (s), 674 (w).

### e) Control experiments of oxidative $\delta$ -trifluoromethylation of 2-alkyl benzohydrazides

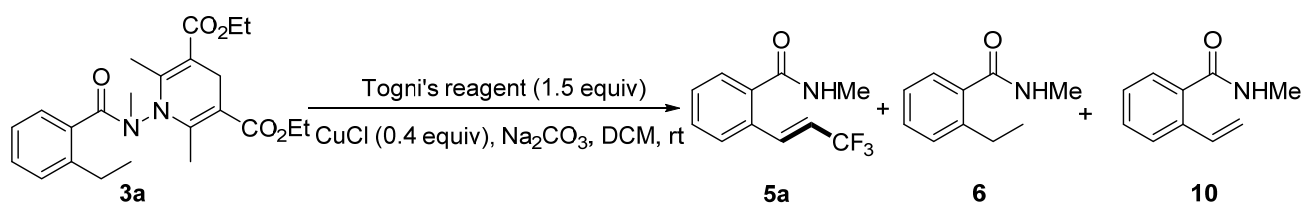

To a screw cap tube charged with CuCl (4.0 mg, 0.04 mmol) and Na<sub>2</sub>CO<sub>3</sub> (31.8 mg, 0.3 mmol, 3.0 equiv) was added a solution of Togni's reagent (47.4 mg, 0.15 mmol, 1.5 equiv) in DCM (0.5 mL) under argon atmosphere. After stirring for 2 min, substrate **3a** (0.1 mmol, 1.0 equiv) in DCM (0.5 mL) was added to the above mixture. After being stirred for 4 hours at room temperature under argon atmosphere, the reaction mixture was quenched with water, extracted with EtOAc. The organic extracts were washed with Na<sub>2</sub>CO<sub>3</sub> solution and brine, dried over Na<sub>2</sub>SO<sub>4</sub>. The solvent was removed under reduced pressure. The residue was purified by flash chromatography (SiO<sub>2</sub>, eluent: PE/EtOAc = 2/1) to give **5a** (9.5 mg, 42% yield), **10** (1.9 mg, 12% yield), **6** (0.7 mg, 4% yield).

### 2-ethyl-N-methylbenzamide (**6**)

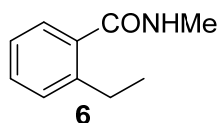

The physical and spectroscopic data were in accordance with those reported in the literature.<sup>3</sup>

$^1\text{H NMR}$  (400 MHz,  $\text{CDCl}_3$ )  $\delta$  7.24 (td,  $J = 7.5, 1.5$  Hz, 1H), 7.19 (dd,  $J = 7.3, 1.2$  Hz, 1H), 7.16 (d,  $J = 7.8$  Hz, 1H), 7.08 (td,  $J = 7.5, 1.3$  Hz, 1H), 5.95 (s, 1H), 2.85 (d,  $J = 4.9$  Hz, 3H), 2.68 (q,  $J = 7.6$  Hz, 2H), 1.13 (t,  $J = 7.6$  Hz, 3H).

$^{13}\text{C NMR}$  (101 MHz,  $\text{CDCl}_3$ )  $\delta$  171.0, 142.2, 136.3, 129.8, 129.3, 126.7, 125.6, 26.6, 26.3, 15.8.

***N*-methyl-2-vinylbenzamide (10)**

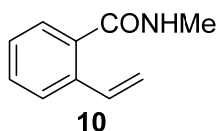

The physical and spectroscopic data were in accordance with those reported in the literature.<sup>2</sup>

$^1\text{H NMR}$  (400 MHz,  $\text{CDCl}_3$ )  $\delta$  7.55 (dd,  $J = 7.8, 1.1$  Hz, 1H), 7.46 – 7.34 (m, 2H), 7.30 – 7.22 (m, 1H), 7.02 (dd,  $J = 17.5, 10.9$  Hz, 1H), 5.88 (s, 1H), 5.70 (dd,  $J = 17.5, 1.1$  Hz, 1H), 5.33 (dd,  $J = 10.9, 1.1$  Hz, 1H), 2.97 (d,  $J = 4.9$  Hz, 3H).

$^{13}\text{C NMR}$  (101 MHz,  $\text{CDCl}_3$ )  $\delta$  170.1, 135.8, 135.4, 134.5, 130.1, 127.7, 127.4, 126.2, 116.7, 26.8.

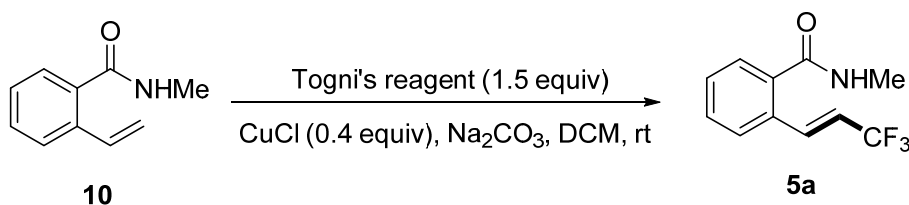

To a screw cap tube charged with CuCl (4.0 mg, 0.04 mmol) and  $\text{Na}_2\text{CO}_3$  (31.8 mg, 0.3 mmol, 3.0 equiv) was added a solution of Togni's reagent (63.2 mg, 0.2 mmol, 2.0 equiv) in DCM (0.5 mL) under argon atmosphere. After stirring for 2 min, compound **10** (16.1 mg, 0.1 mmol, 1.0 equiv) in DCM (0.5 mL) was added to the above mixture. After being stirred for 4 hours at room temperature under argon atmosphere, the reaction mixture was quenched with water, extracted with EtOAc. The organic extracts were washed with  $\text{Na}_2\text{CO}_3$  solution and brine, dried over  $\text{Na}_2\text{SO}_4$ . The solvent was removed under reduced pressure. The residue was purified by flash chromatography ( $\text{SiO}_2$ , eluent: PE/EtOAc = 2/1) to give **5a** (20.4 mg, 89% yield).

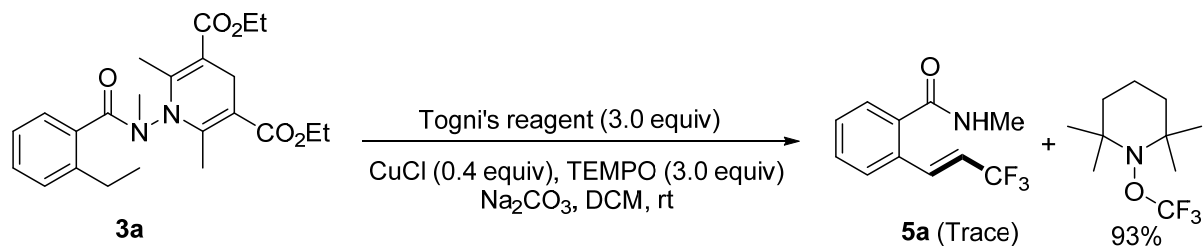

To a screw cap tube charged with CuCl (4.0 mg, 0.04 mmol) and Na<sub>2</sub>CO<sub>3</sub> (31.8 mg, 0.3 mmol, 3.0 equiv) was added a solution of Togni's reagent (94.8 mg, 0.3 mmol, 3.0 equiv) in DCM (0.5 mL) under argon atmosphere. After stirring for 2 min, compound **3a** (41.4 mg, 0.1 mmol, 1.0 equiv) and TEMPO (46.8 mg, 0.3 mmol, 3.0 equiv) in DCM (0.5 mL) was added to the above mixture. After being stirred for 4 hours at room temperature under argon atmosphere, the reaction mixture was quenched with water, extracted with EtOAc. The organic extracts were washed with Na<sub>2</sub>CO<sub>3</sub> solution and brine, dried over Na<sub>2</sub>SO<sub>4</sub>. The solvent was removed under reduced pressure. The yield of **TEMPO-CF<sub>3</sub>**<sup>4</sup> was determined by <sup>19</sup>F NMR analysis (PhF was internal reference) as 94% yield.

#### d) KIE Experiments of oxidative $\delta$ -trifluoromethylation of 2-ethyl benzohdrazides

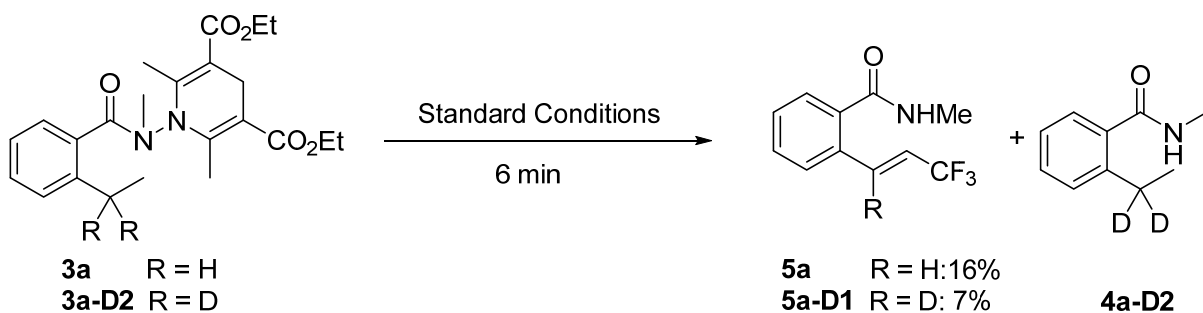

Two sets of reactions were carried out in parallel under the standard conditions, and quenched with aqueous Na<sub>2</sub>CO<sub>3</sub> in 6 min. **5a** and **5a-D1** were isolated in 16% and 7% yield, respectively. Note: **5a-D1** was not pure, which was contaminated with amide **4a-D2**.

#### (*E*)-*N*-methyl-2-(3,3,3-trifluoroprop-1-en-1-yl-1-d)benzamide (**5a-D1**)

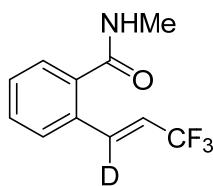

**$^1\text{H}$  NMR** (400 MHz,  $\text{CDCl}_3$ )  $\delta$  7.49 (dd,  $J = 8.0, 1.4$  Hz, 1H), 7.41 – 7.36 (m, 2H), 7.34 – 7.29 (m, 1H), 6.08 (qt,  $J = 6.4, 2.2$  Hz, 1H), 5.89 (s, 1H), 2.92 (d,  $J = 4.9$  Hz, 3H).

**$^{13}\text{C}$  NMR** (101 MHz,  $\text{CDCl}_3$ )  $\delta$  169.2, 136.5, 135.2 (m), 131.9, 130.4, 129.7, 127.4, 127.0, 123.3 (q,  $J = 269.2$  Hz), 117.9 (q,  $J = 34.0$  Hz), 26.9.

**IR (neat)  $\text{cm}^{-1}$   $\nu$ :** 3293 (w), 1667 (w), 1543 (w), 1471 (w), 1410 (w), 1302 (m), 1261 (m), 1115 (s), 970 (w), 915 (w), 836 (w), 761 (m), 699 (s).

**HRMS (ESI)  $m/z$ :**  $[\text{M} + \text{H}]^+$  Calcd for  $\text{C}_{11}\text{H}_{10}[\text{2H}]\text{F}_3\text{NO}^+$  231.0850; Found 231.0851.

### c) Isoindolinone (**11**) formation

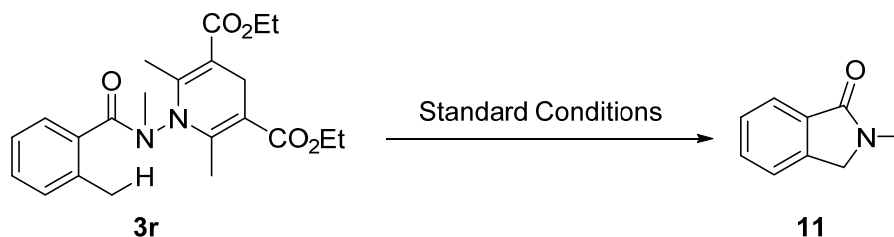

To a screw cap tube charged with  $\text{CuCl}$  (4.0 mg, 0.04 mmol) and  $\text{Na}_2\text{CO}_3$  (31.8 mg, 0.3 mmol, 3.0 equiv) was added a solution of Togni's reagent (94.8 mg, 0.3 mmol, 3.0 equiv) in DCM (0.5 mL) under argon atmosphere. After stirring for 2 min, compound **3r** (40.0 mg, 0.1 mmol, 1.0 equiv) in DCM (0.5 mL) was added to the above mixture. After being stirred for 4 hours at room temperature under argon atmosphere, the reaction mixture was quenched with water, extracted with EtOAc. The organic extracts were washed with  $\text{Na}_2\text{CO}_3$  solution and brine, dried over  $\text{Na}_2\text{SO}_4$ . The solvent was removed under reduced pressure. The residue was purified by flash chromatography ( $\text{SiO}_2$ , eluent: PE/EtOAc = 2/1) to give **11** (5.3 mg, 36% yield). The physical and spectroscopic data were in accordance with those reported in the literature.<sup>5</sup>

$^1\text{H NMR}$  (400 MHz,  $\text{CDCl}_3$ ): 3.22 (s, 3H), 4.38 (s, 2H), 7.47 (t,  $J = 8.1$  Hz, 2H), 7.54 (t,  $J = 7.4$  Hz, 1H), 7.82 (d,  $J = 7.5$  Hz, 1H).

## Supplementary Note 2: transformation of amides **4a**

a)

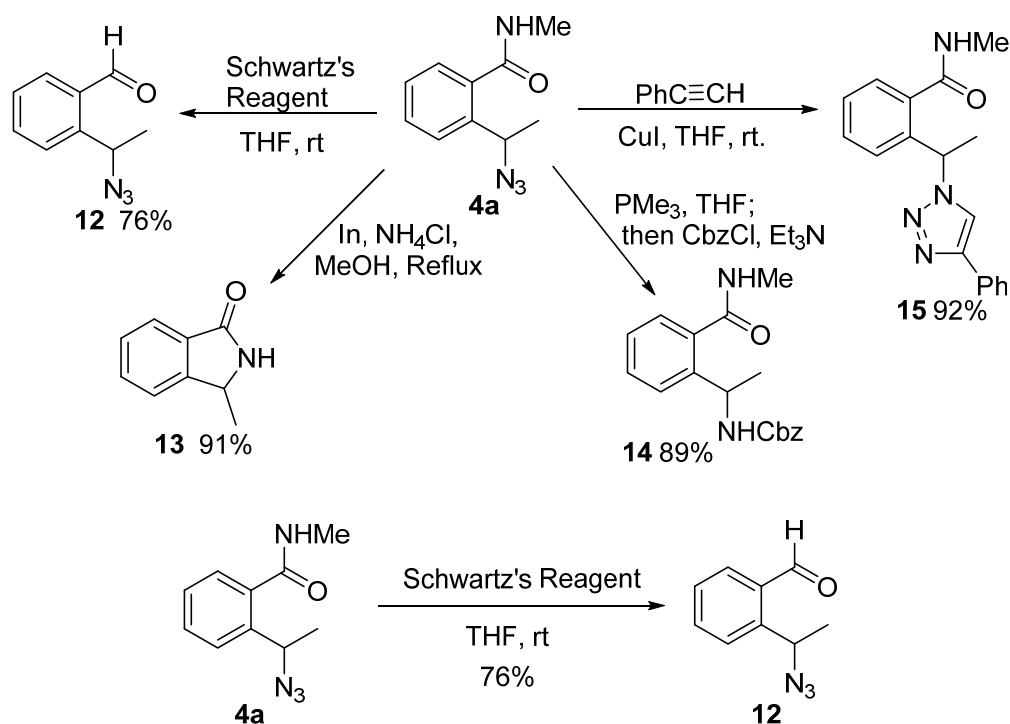

To a solution of **4a** (20.4 mg, 0.1 mmol, 1.0 equiv) in THF (2.0 mL) was added Schwartz's reagent (35.0 mg, 0.12 mmol, 1.2 equiv) at room temperature. The reaction mixture was stirred at room temperature overnight, then the solvent was removed under reduced pressure. The residue was purified by flash chromatography ( $\text{SiO}_2$ , eluent: PE/EtOAc = 3/1) to give **12** (13.2 mg, 76% yield) as an oil.

### 2-(1-azidoethyl)benzaldehyde (**12**)

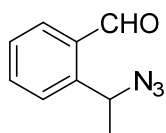

$^1\text{H NMR}$  (400 MHz,  $\text{CDCl}_3$ )  $\delta$  10.16 (s, 1H), 7.85 – 7.79 (m, 1H), 7.70 – 7.61 (m, 2H), 7.52 (ddd,  $J = 7.6, 6.7, 2.1$  Hz, 1H), 5.79 (q,  $J = 6.7$  Hz, 1H), 1.53 (d,  $J = 6.7$  Hz, 3H).



$^{13}\text{C}$  NMR (101 MHz,  $\text{CDCl}_3$ )  $\delta$  193.1, 143.5, 134.8, 134.5, 132.7, 128.3, 127.1, 56.6, 22.2.

IR (neat)  $\text{cm}^{-1}$   $\nu$ : 3220 (w), 1688 (s), 1616 (w), 1469 (w), 1416 (w), 1356 (w), 1308 (w), 1142 (w), 1099 (m), 798 (w), 761 (m), 716 (m), 703 (s).

HRMS (ESI)  $m/z$ :  $[\text{M} + \text{H}]^+$  Calcd for  $\text{C}_9\text{H}_{10}\text{N}_3\text{O}^+$  176.0818; Found 176.0816

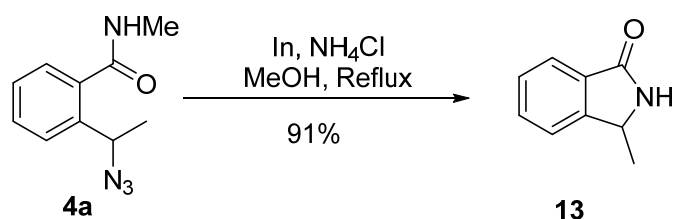

To a solution of **4a** (20.4 mg, 0.1 mmol, 1.0 equiv) and  $\text{NH}_4\text{Cl}$  (32.1 mg, 0.6 mmol, 6.0 equiv) in MeOH (3.0 mL) was added In (68.9 mg, 0.6 mmol, 6.0 equiv) at room temperature. The reaction mixture was stirred under reflux for 24 hours, then quenched with water, extracted with EtOAc. The organic extracts were washed with  $\text{Na}_2\text{CO}_3$  solution and brine, dried over  $\text{Na}_2\text{SO}_4$ . The solvent was removed under reduced pressure. The residue was purified by flash chromatography ( $\text{SiO}_2$ , eluent: PE/EtOAc = 2/1) to give **13** (13.5 mg, 91% yield), the physical and spectroscopic data were in accordance with those reported in the literature<sup>6</sup>.

### 3-methylisoindolin-1-one (**13**)

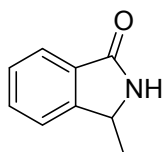

$^1\text{H}$  NMR (400 MHz,  $\text{CDCl}_3$ )  $\delta$  8.11 (s, 1H), 7.84 (d,  $J = 7.5$  Hz, 1H), 7.55 (td,  $J = 7.5, 1.2$  Hz, 1H), 7.49 – 7.39 (m, 2H), 4.70 (q,  $J = 6.7$  Hz, 1H), 1.50 (d,  $J = 6.8$  Hz, 3H).

$^{13}\text{C}$  NMR (101 MHz,  $\text{CDCl}_3$ )  $\delta$  171.3, 149.1, 131.91, 131.87, 128.1, 123.7, 122.3, 52.8, 20.4.

HRMS (ESI)  $m/z$ :  $[\text{M} + \text{H}]^+$  Calcd for  $\text{C}_9\text{H}_{10}\text{NO}^+$  148.0757; Found 148.0754.

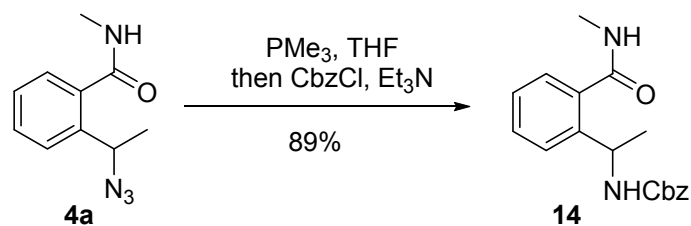

To a solution of **4a** (20.4 mg, 0.1 mmol, 1.0 equiv) in THF (2.0 mL) was added  $\text{PMe}_3$  (1.0 M in THF, 2.0 mL, 2.0 equiv) at room temperature. The reaction mixture was stirred at room temperature overnight.  $\text{Et}_3\text{N}$  (30  $\mu\text{L}$ , 0.3 mmol) and  $\text{CbzCl}$  (29.0  $\mu\text{L}$ , 0.2 mmol, 2.0 equiv) were added to the above mixture at 0 °C. After stirring for 1 h, the reaction mixture was quenched with water, extracted with EtOAc. The organic extracts were washed with  $\text{Na}_2\text{CO}_3$  solution and brine, dried over  $\text{Na}_2\text{SO}_4$ . The solvent was removed under reduced pressure. The residue was purified by flash chromatography ( $\text{SiO}_2$ , eluent: PE/EtOAc = 3/1) to give **14** (27.7 mg, 89% yield) as colorless oil.

#### benzyl (1-(2-(methylcarbamoyl)phenyl)ethyl)carbamate (**14**)

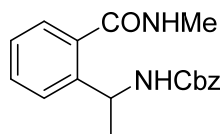

**$^1\text{H NMR}$**  (400 MHz,  $\text{CDCl}_3$ )  $\delta$  7.85 – 6.98 (m, 9H), 5.90 (d,  $J = 6.9$  Hz, 1H), 5.28 – 4.88 (m, 3H), 2.99 (d,  $J = 4.7$  Hz, 3H), 1.44 (d,  $J = 6.9$  Hz, 3H).

**$^{13}\text{C NMR}$**  (101 MHz,  $\text{CDCl}_3$ )  $\delta$  170.8, 156.2, 141.4, 136.3, 135.9, 130.4, 128.6, 128.3, 128.15, 128.12, 127.5, 126.7, 66.9, 48.9, 26.8, 23.1.

**IR (neat)  $\text{cm}^{-1}$   $\nu$ :** 3278 (w), 2968 (w), 2160 (w), 1698 (s), 1638 (s), 1530 (s), 1455 (m), 1313 (m), 1250 (s), 1049 (s), 1005 (m), 755 (s), 731 (s), 697 (s).

**HRMS (ESI)  $m/z$ :**  $[\text{M} + \text{H}]^+$  Calcd for  $\text{C}_{18}\text{H}_{21}\text{N}_2\text{O}_3^+$  313.1547; Found 313.1544.

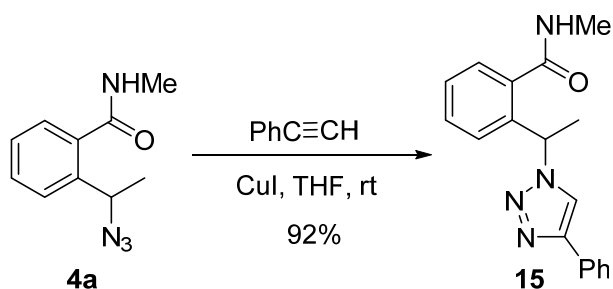

To a solution of **4a** (20.4 mg, 0.1 mmol, 1.0 equiv) and CuI (3.8 mg, 0.02 mmol, 0.02 equiv) in THF (1.0 mL) was added ethynylbenzene (33  $\mu$ L, 0.3 mmol, 3.0 equiv) at room temperature. The reaction mixture was stirred at room temperature for 24 hours, then quenched with water, and extracted with EtOAc. The organic extracts were washed with Na<sub>2</sub>CO<sub>3</sub> solution and brine, dried over Na<sub>2</sub>SO<sub>4</sub>. The solvent was removed under reduced pressure. The residue was purified by flash chromatography (SiO<sub>2</sub>, eluent: PE/EtOAc = 1/1) to give **15** (28.1 mg, 92% yield).

#### **N-methyl-2-(1-(4-phenyl-1H-1,2,3-triazol-1-yl)ethyl)benzamide (15)**

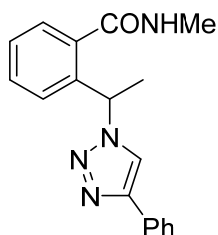

**<sup>1</sup>H NMR** (400 MHz, CDCl<sub>3</sub>)  $\delta$  7.96 (s, 1H), 7.74 (d,  $J$  = 6.9 Hz, 2H), 7.40 – 7.30 (m, 5H), 7.29 – 7.18 (m, 2H), 6.73 (d,  $J$  = 5.0 Hz, 1H), 6.34 (q,  $J$  = 7.0 Hz, 1H), 2.93 (d,  $J$  = 4.8 Hz, 3H), 1.98 (d,  $J$  = 7.0 Hz, 3H).

**<sup>13</sup>C NMR** (101 MHz, CDCl<sub>3</sub>)  $\delta$  169.9, 147.3, 138.9, 135.3, 130.8, 130.6, 128.8, 128.3, 128.1, 127.3, 126.8, 125.6, 119.8, 56.3, 26.8, 21.2.

**IR (neat) cm<sup>-1</sup>**: 3291 (w), 2938 (w), 1639 (m), 1542 (m), 1484 (w), 1410 (w), 1307 (w), 1225 (w), 1157 (w), 1077 (w), 1030 (w), 911 (w), 763 (s), 729 (s), 720 (s), 694 (s).

**HRMS** (ESI)  $m/z$ : [M + H]<sup>+</sup> Calcd for C<sub>18</sub>H<sub>19</sub>N<sub>4</sub>O<sup>+</sup> 307.1553; Found 307.1545.

b)

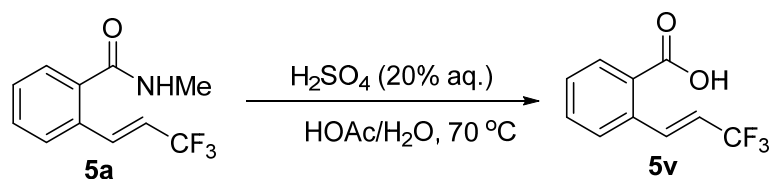

To a solution of **5a** (22.9 mg, 0.01 mmol, 1.0 equiv) in HOAc (1.0 mL) and water (1.0 mL) was added H<sub>2</sub>SO<sub>4</sub> (0.5 mL, 20% aq.) at room temperature. The reaction mixture was stirred at 70 °C for 24 h. The mixture was extracted with EtOAc. The organic extracts were washed with brine, dried over Na<sub>2</sub>SO<sub>4</sub>. The solvent was removed under reduced pressure. The residue was purified by a short column flash chromatography (SiO<sub>2</sub>, eluent: EtOAc/PE = 1:1) to give **5v** (15.2 mg, 71% yield) as a white solid.

**MP:** 103 – 104 °C

**<sup>1</sup>H NMR** (400 MHz, CDCl<sub>3</sub>)  $\delta$  12.20 (s, 1H), 8.17 (dd,  $J = 7.9, 1.4$  Hz, 1H), 8.12 (dq,  $J = 16.0, 2.3$  Hz, 1H), 7.66-7.61 (m, 1H), 7.57 (dd,  $J = 7.9, 1.4$  Hz, 1H), 7.51 (td,  $J = 7.6, 1.5$  Hz, 1H), 6.09 (dq,  $J = 16.0, 6.4$  Hz, 1H).

**<sup>13</sup>C NMR** (101 MHz, CDCl<sub>3</sub>)  $\delta$  172.5, 137.5 (q,  $J = 7.0$  Hz), 136.7, 133.8, 132.0, 129.6, 128.4, 128.0, 123.3 (q,  $J = 269.4$  Hz), 118.9 (q,  $J = 33.8$  Hz).

**<sup>19</sup>F NMR** (376 MHz, CDCl<sub>3</sub>)  $\delta$  -63.65 (dd,  $J = 6.3, 2.5$  Hz).

**IR (neat) cm<sup>-1</sup> v:** 3247 (w), 2164 (w), 1687 (s), 1572 (w), 1489 (w), 1415 (m), 1308 (m), 1267 (s), 1107 (s), 1080 (s), 966 (m), 928 (m), 749 (s).

**HRMS** (ESI)  $m/z$ : [M - H]<sup>-</sup> Calcd for C<sub>10</sub>H<sub>6</sub>F<sub>3</sub>O<sub>2</sub><sup>-</sup> 215.0325; Found 215.0324.

### Supplementary Note 3: crystallographic data for 5a

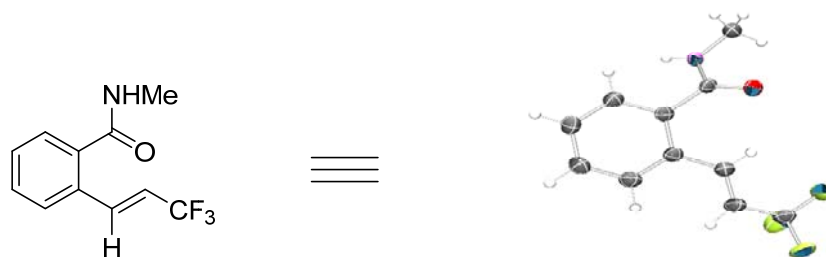

**Table S7** Crystal data and structure refinement for 5a

|                                 |                                                             |                        |
|---------------------------------|-------------------------------------------------------------|------------------------|
| Identification code             | bax1188e-a                                                  |                        |
| Empirical formula               | C <sub>11</sub> H <sub>10</sub> F <sub>3</sub> NO           |                        |
| Formula weight                  | 229.20                                                      |                        |
| Temperature                     | 140.00(10) K                                                |                        |
| Wavelength                      | 1.54184 Å                                                   |                        |
| Crystal system                  | Monoclinic                                                  |                        |
| Space group                     | <i>P</i> <sub>2</sub> <sub>1</sub> / <i>c</i>               |                        |
| Unit cell dimensions            | <i>a</i> = 14.2553(4) Å                                     | $\alpha$ = 90°.        |
|                                 | <i>b</i> = 4.95361(10) Å                                    | $\beta$ = 110.625(3)°. |
|                                 | <i>c</i> = 16.0604(4) Å                                     | $\gamma$ = 90°.        |
| Volume                          | 1061.42(5) Å <sup>3</sup>                                   |                        |
| <i>Z</i>                        | 4                                                           |                        |
| Density (calculated)            | 1.434 Mg/m <sup>3</sup>                                     |                        |
| Absorption coefficient          | 1.118 mm <sup>-1</sup>                                      |                        |
| <i>F</i> (000)                  | 472                                                         |                        |
| Crystal size                    | 0.435 x 0.223 x 0.189 mm <sup>3</sup>                       |                        |
| Theta range for data collection | 5.648 to 75.096°.                                           |                        |
| Index ranges                    | -17 ≤ <i>h</i> ≤ 17, -5 ≤ <i>k</i> ≤ 3, -19 ≤ <i>l</i> ≤ 19 |                        |
| Reflections collected           | 6516                                                        |                        |

|                                         |                                          |
|-----------------------------------------|------------------------------------------|
| Independent reflections                 | 2123 [ $R_{\text{int}} = 0.0169$ ]       |
| Completeness to $\theta = 67.684^\circ$ | 99.9 %                                   |
| Absorption correction                   | Gaussian                                 |
| Max. and min. transmission              | 1.000 and 0.458                          |
| Refinement method                       | Full-matrix least-squares on $F^2$       |
| Data / restraints / parameters          | 2123 / 0 / 186                           |
| Goodness-of-fit on $F^2$                | 1.051                                    |
| Final $R$ indices [ $I > 2 \sigma(I)$ ] | $R_1 = 0.0347$ , $wR_2 = 0.0942$         |
| $R$ indices (all data)                  | $R_1 = 0.0370$ , $wR_2 = 0.0966$         |
| Extinction coefficient                  | 0.0036(5)                                |
| <u>Largest diff. peak and hole</u>      | <u>0.331 and -0.273 e.Å<sup>-3</sup></u> |

CCDC No.: CCDC 1866223

### Supplementary References:

1. Chou, C.-M.; Guin, J.; Mück-Lichtenfeld, C.; Grimme, S.; Studer, A. Radical-Transfer Hydroamination of Olefins with N-Aminated Dihydropyridines. *Chem. Asian J.* **2011**, *6*, 1197.
2. Talbot, E. P. A.; Fernandes, T. de A.; McKenna, J. M.; Toste, F. D. Asymmetric Palladium-Catalyzed Directed Intermolecular Fluoroarylation of Styrenes. *J. Am. Chem. Soc.* **2014**, *136*, 4101.
3. Havlik, S. E.; Simmons, J. M.; Winton, V. J.; Johnson, J. B. Nickel-Mediated Decarbonylative Cross-Coupling of Phthalimides with in Situ Generated Diorganozinc Reagents. *J. Org. Chem.* **2011**, *76*, 3588.
4. Zhu, Z.-Z.; Chen, K.; Yu, L.-Z.; Tang, X.-Y.; Shi, M. Copper(I)-Catalyzed Intramolecular Trifluoromethylation of Methylene cyclopropanes. *Org. Lett.* **2015**, *17*, 5994.
5. Dang, T. T.; Zhu, Y.; Ngiam, J. S. Y.; Ghosh, S. C.; Chen, A.; Seayad, A. M. Palladium Nanoparticles Supported on ZIF-8 As an Efficient Heterogeneous Catalyst for Aminocarbonylation. *ACS Catal.* **2013**, *3*, 1406.

6. Ruan, Y. P.; Chen, M. D.; He, M. Z.; Zhou, X.; Huang, P. Q. A Practical Two-Step Synthesis of 3-Alkyl-2,3-dihydro-1H-isoindolin-1-ones. *Synth. Commun.* **2004**, *34*, 853.
